# Supplementary material for: Synthesis of Half-Titanocene Complexes Containing π,π-Stacked Aryloxide Ligands, and Their Use as Catalysts for Ethylene (Co)polymerizations
Source: MDPI journal article supplement (doi:10.3390/polym14071427), 2022-03-31
Supplement: s1 [file s1]

# Synthesis of Half-Titanocene Complexes Containing $\pi,\pi$ -Stacked Aryloxide Ligands, and Their Use as Catalysts for Ethylene (Co)polymerizations

Jin Gu,<sup>1</sup> Xiaohua Wang,<sup>2</sup> Wenpeng Zhao,<sup>2</sup> Rui Zhuang,<sup>1,3</sup> Chunyu Zhang,<sup>2,3</sup> Xuequan Zhang<sup>2,3</sup>, Yinghui Cai<sup>1</sup>, Wenbo Yuan<sup>1</sup>, Bo Luan<sup>1</sup>, Bo Dong,<sup>1,3\*</sup> Heng Liu<sup>2,3\*</sup>

<sup>1</sup> Shandong Provincial Key Laboratory of Olefin Catalysis and Polymerization, Chambroad Chemical Industry Research Institute Co., Ltd., Qingdao, 266042, China;

<sup>2</sup> Key Laboratory of Rubber-Plastics, Ministry of Education/ Shandong Provincial Key Laboratory of Rubber-plastics, Qingdao University of Science & Technology, Qingdao, 266042, China;

<sup>3</sup> Changchun Institute of Applied Chemistry, Chinese Academy of Sciences, Changchun, 130022, Jilin, China;

## Contents

|                                                                                  |           |
|----------------------------------------------------------------------------------|-----------|
| 1. Crystal data and structure refinement details table for <b>Ti1, Ti3</b> ..... | <b>S2</b> |
| 2. NMR Figures of poly(ethylene/1-hexene) obtained in different conditions ..... | <b>S3</b> |

**Table S1** Crystallographic data and refinement details for complex **Ti1** and **Ti3**.

|                                   | <b>Ti1</b>                                          | <b>Ti3</b>                                          |
|-----------------------------------|-----------------------------------------------------|-----------------------------------------------------|
| Empirical formula                 | C <sub>15</sub> H <sub>12</sub> Cl <sub>2</sub> OTi | C <sub>22</sub> H <sub>16</sub> Cl <sub>4</sub> OTi |
| Formula weight                    | 327.05                                              | 486.05                                              |
| Crystal color                     | Red                                                 | Red                                                 |
| Temperature (K)                   | 273                                                 | 187                                                 |
| Wave length (Å)                   | 0.71073                                             | 0.71073                                             |
| Crystal system                    | Monoclinic                                          | Monoclinic                                          |
| Space group                       | P2 <sub>1</sub> /c                                  | P2 <sub>1</sub> /c                                  |
| a (Å)                             | 9.989 (6)                                           | 16.662(12)                                          |
| b (Å)                             | 7.039 (4)                                           | 10.291 (10)                                         |
| c (Å)                             | 19.978 (11)                                         | 12.087 (4)                                          |
| α (°)                             | 90                                                  | 90                                                  |
| β (°)                             | 92.25                                               | 101.1 (2)                                           |
| γ (°)                             | 90                                                  | 90                                                  |
| Volume(Å <sup>3</sup> )           | 1403.6                                              | 2033.6                                              |
| Z                                 | 4                                                   | 4                                                   |
| D calcd (mg m <sup>-3</sup> )     | 1.548                                               | 1.588                                               |
| μ (mm <sup>-1</sup> )             | 0.98                                                | 0.96                                                |
| F (000)                           | 664                                                 | 984                                                 |
| Crystal size (mm)                 | 0.17 × 0.16 × 0.15                                  | 0.21 × 0.18 × 0.11                                  |
| θ range (°)                       | 2.8–26.4                                            | 2.3–26.4                                            |
| Limiting indices                  | -12 ≤ h ≤ 12<br>-8 ≤ k ≤ 8<br>-13 ≤ l ≤ 24          | -20 ≤ h ≤ 20<br>-12 ≤ k ≤ 12<br>-8 ≤ l ≤ 15         |
| No. of rflns collected            | 2848                                                | 12457                                               |
| No. of unique rflns               | 2567                                                | 4135                                                |
| R <sub>int</sub>                  | 0.037                                               | 0.029                                               |
| Goodness-of-fit on F <sup>2</sup> | 1.05                                                | 1.03                                                |
| wR2                               | 0.091                                               | 0.122                                               |

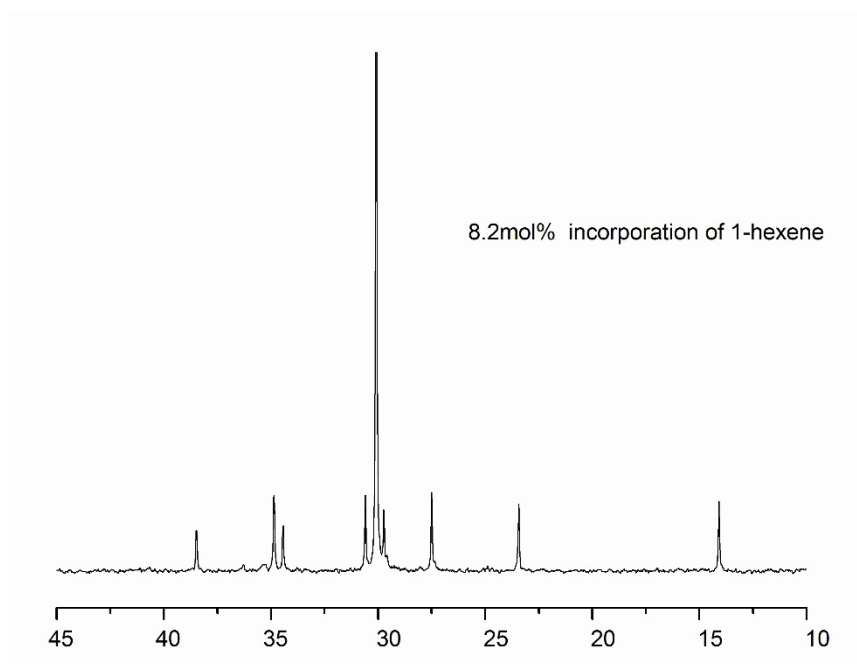

**Figure S1**  $^{13}\text{C}$  NMR spectrum of ethylene/1-hexene copolymer obtained with **1a**/MAO system (Table 2, Entry 9).

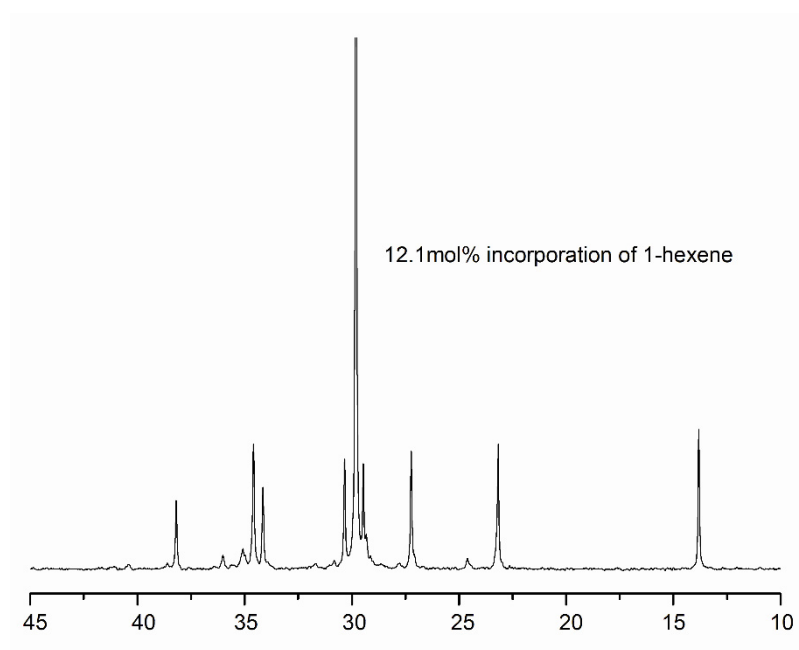

**Figure S2**  $^{13}\text{C}$  NMR spectrum of ethylene/1-hexene copolymer obtained with **1a**/MAO system (Table 2, Entry 10).

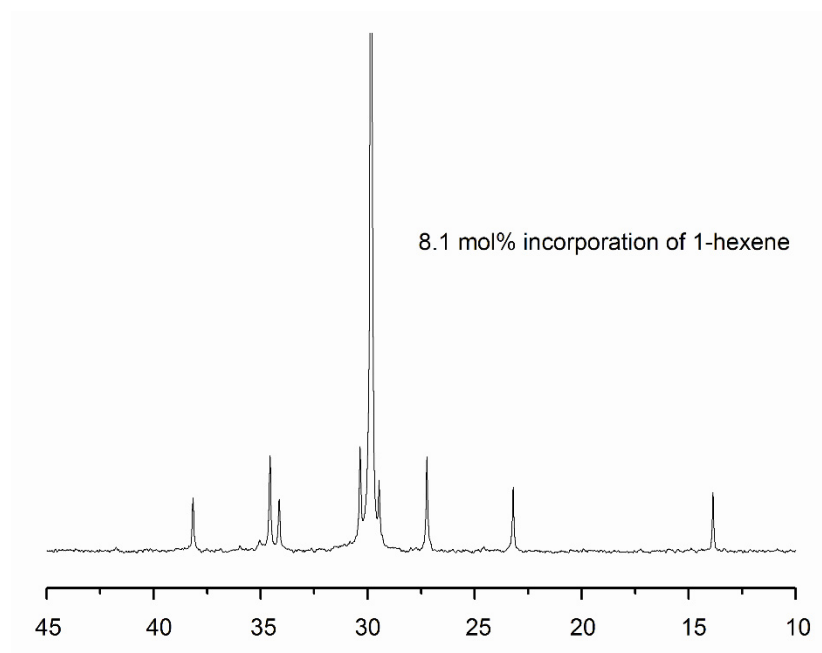

**Figure S3**  $^{13}\text{C}$  NMR spectrum of ethylene/1-hexene copolymer obtained with **2a**/MAO system (Table 2, Entry 11).

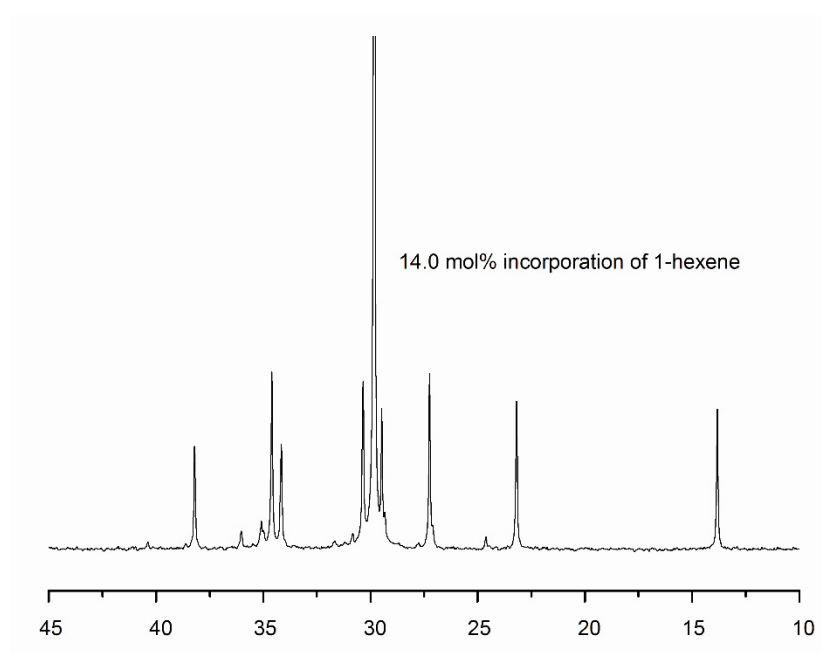

**Figure S4.**  $^{13}\text{C}$  NMR spectrum of ethylene/1-hexene copolymer obtained with **2a**/MAO system (Table 2, Entry 11).

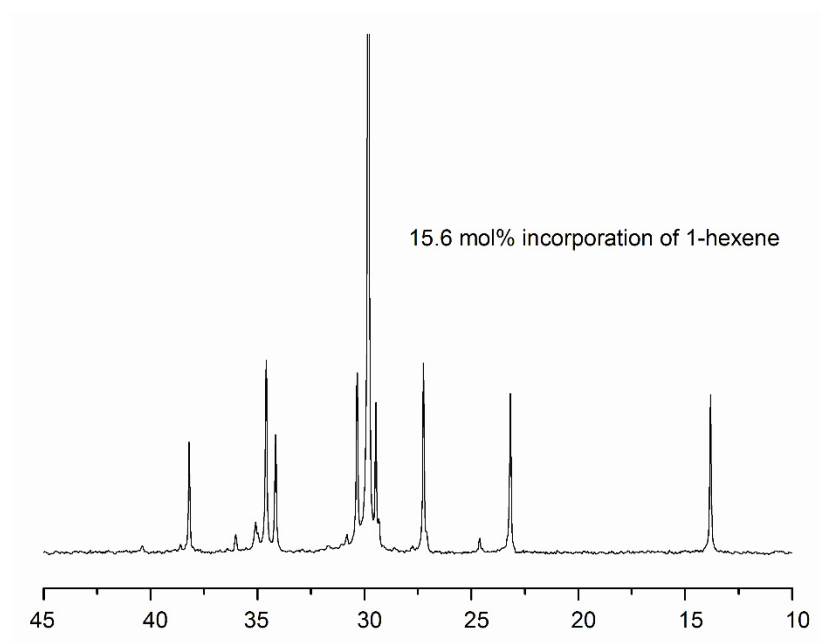

**Figure S5**  $^{13}\text{C}$  NMR spectrum of ethylene/1-hexene copolymer obtained with **2a**/MAO system (**Table 2, Entry 12**).
