# Supplementary material for: Synthesis of Half-Titanocene Complexes Containing π,π-Stacked Aryloxide Ligands, and Their Use as Catalysts for Ethylene (Co)polymerizations
Source: Polymers (Basel). 2022 Mar 31;14(7):1427. doi: 10.3390/polym14071427 (PMC9002825; doi:10.3390/polym14071427)
Supplement: Supplementary file 1 [file polymers-14-01427-s001.zip]

Archive with 5 entries (5 files):
- supporting information.pdf
- Ti 1.cif
- Ti 1.pdf
- Ti 3.cif
- Ti 3.pdf
