# Supplementary material for: Synthesis of Half-Titanocene Complexes Containing π,π-Stacked Aryloxide Ligands, and Their Use as Catalysts for Ethylene (Co)polymerizations
Source: Polymers (Basel). 2022 Mar 31;14(7):1427. doi: 10.3390/polym14071427 (PMC9002825; doi:10.3390/polym14071427)
Supplement: Supplementary file 1 [file polymers-14-01427-s001.zip › Ti 1.cif]

data_d196m
_audit_creation_date               2018-10-19
_audit_creation_method
;
Olex2 1.2
(compiled 2018.05.29 svn.r3508 for OlexSys, GUI svn.r5506)
;
_shelx_SHELXL_version_number       '2018/3'
_audit_contact_author_address      ?
_audit_contact_author_email        ?
_audit_contact_author_name         ''
_audit_contact_author_phone        ?
_publ_contact_author_id_orcid      ?
_publ_section_references
;
Dolomanov, O.V., Bourhis, L.J., Gildea, R.J, Howard, J.A.K. & Puschmann, H.
 (2009), J. Appl. Cryst. 42, 339-341.

Sheldrick, G.M. (2015). Acta Cryst. A71, 3-8.

Sheldrick, G.M. (2015). Acta Cryst. C71, 3-8.
;
_chemical_name_common              ?
_chemical_name_systematic          ?
_chemical_formula_moiety           'C15 H12 Cl2 O Ti'
_chemical_formula_sum              'C15 H12 Cl2 O Ti'
_chemical_formula_weight           327.05
_chemical_melting_point            ?
loop_
  _atom_type_symbol
  _atom_type_description
  _atom_type_scat_dispersion_real
  _atom_type_scat_dispersion_imag
  _atom_type_scat_source
 'C' 'C' 0.0033 0.0016 'International Tables Vol C Tables 4.2.6.8 and 6.1.1.4'
 'H' 'H' 0.0000 0.0000 'International Tables Vol C Tables 4.2.6.8 and 6.1.1.4'
 'Cl' 'Cl' 0.1484 0.1585 'International Tables Vol C Tables 4.2.6.8 and 6.1.1.4'
 'O' 'O' 0.0106 0.0060 'International Tables Vol C Tables 4.2.6.8 and 6.1.1.4'
 'Ti' 'Ti' 0.2776 0.4457 'International Tables Vol C Tables 4.2.6.8 and 6.1.1.4'

_shelx_space_group_comment
;
The symmetry employed for this shelxl refinement is uniquely defined
by the following loop, which should always be used as a source of
symmetry information in preference to the above space-group names.
They are only intended as comments.
;
_space_group_crystal_system        'monoclinic'
_space_group_IT_number             14
_space_group_name_H-M_alt          'P 1 21/c 1'
_space_group_name_Hall             '-P 2ybc'
loop_
  _space_group_symop_operation_xyz
 'x, y, z'
 '-x, y+1/2, -z+1/2'
 '-x, -y, -z'
 'x, -y-1/2, z-1/2'

_cell_length_a                     9.989(6)
_cell_length_b                     7.039(4)
_cell_length_c                     19.978(11)
_cell_angle_alpha                  90
_cell_angle_beta                   92.25
_cell_angle_gamma                  90
_cell_volume                       1403.6(14)
_cell_formula_units_Z              4
_cell_measurement_reflns_used      4076
_cell_measurement_temperature      273(2)
_cell_measurement_theta_max        26.352
_cell_measurement_theta_min        2.829
_shelx_estimated_absorpt_T_max     0.867
_shelx_estimated_absorpt_T_min     0.851
_exptl_absorpt_coefficient_mu      0.977
_exptl_absorpt_correction_T_max    1.000000
_exptl_absorpt_correction_T_min    0.726645
_exptl_absorpt_correction_type     multi-scan
_exptl_absorpt_process_details    
 'SADABS v.2.10 (Bruker,2003) was used for absorption correction. R(int) was 0.0699 before and 0.0247 after correction. The Ratio of minimum to maximum transmission is 0.7266. The \l/2 correction factor is 0.0015.'
_exptl_absorpt_special_details     ?
_exptl_crystal_colour              colourless
_exptl_crystal_colour_primary      colourless
_exptl_crystal_density_diffrn      1.548
_exptl_crystal_density_meas        .
_exptl_crystal_density_method      ?
_exptl_crystal_description         block
_exptl_crystal_F_000               664
_exptl_crystal_size_max            0.17
_exptl_crystal_size_mid            0.16
_exptl_crystal_size_min            0.15
_exptl_transmission_factor_max     ?
_exptl_transmission_factor_min     ?
_diffrn_reflns_av_R_equivalents    0.0436
_diffrn_reflns_av_unetI/netI       0.0433
_diffrn_reflns_Laue_measured_fraction_full  0.993
_diffrn_reflns_Laue_measured_fraction_max  0.989
_diffrn_reflns_limit_h_max         12
_diffrn_reflns_limit_h_min         -12
_diffrn_reflns_limit_k_max         8
_diffrn_reflns_limit_k_min         -8
_diffrn_reflns_limit_l_max         24
_diffrn_reflns_limit_l_min         -13
_diffrn_reflns_number              7514
_diffrn_reflns_point_group_measured_fraction_full  0.993
_diffrn_reflns_point_group_measured_fraction_max  0.989
_diffrn_reflns_theta_full          25.242
_diffrn_reflns_theta_max           26.354
_diffrn_reflns_theta_min           2.040
_diffrn_ambient_temperature        273.15
_diffrn_detector_area_resol_mean   ?
_diffrn_measured_fraction_theta_full  0.993
_diffrn_measured_fraction_theta_max  0.989
_diffrn_measurement_device_type    'CCD area detector'
_diffrn_measurement_method         'phi and omega scans'
_diffrn_radiation_monochromator    'graphite'
_diffrn_radiation_type             MoK\a
_diffrn_radiation_wavelength       0.71073
_diffrn_source                     ?
_reflns_Friedel_coverage           0.000
_reflns_Friedel_fraction_full      .
_reflns_Friedel_fraction_max       .
_reflns_number_gt                  2567
_reflns_number_total               2848
_reflns_special_details
;
 Reflections were merged by SHELXL according to the crystal
 class for the calculation of statistics and refinement.
 
 _reflns_Friedel_fraction is defined as the number of unique
 Friedel pairs measured divided by the number that would be
 possible theoretically, ignoring centric projections and
 systematic absences.
;
_reflns_threshold_expression       'I > 2\s(I)'
_computing_cell_refinement         'SAINT v6.45A (Bruker, 2003)'
_computing_data_collection         'SAINT v6.45A (Bruker, 2003)'
_computing_data_reduction          'SAINT v6.45A (Bruker, 2003)'
_computing_molecular_graphics      'Olex2 (Dolomanov et al., 2009)'
_computing_publication_material    'Olex2 (Dolomanov et al., 2009)'
_computing_structure_refinement    'ShelXL (Sheldrick, 2015)'
_computing_structure_solution      'ShelXT (Sheldrick, 2015)'
_refine_diff_density_max           0.437
_refine_diff_density_min           -0.420
_refine_diff_density_rms           0.085
_refine_ls_extinction_coef         .
_refine_ls_extinction_method       none
_refine_ls_goodness_of_fit_ref     1.047
_refine_ls_hydrogen_treatment      constr
_refine_ls_matrix_type             full
_refine_ls_number_parameters       172
_refine_ls_number_reflns           2848
_refine_ls_number_restraints       0
_refine_ls_R_factor_all            0.0413
_refine_ls_R_factor_gt             0.0365
_refine_ls_restrained_S_all        1.047
_refine_ls_shift/su_max            0.000
_refine_ls_shift/su_mean           0.000
_refine_ls_structure_factor_coef   Fsqd
_refine_ls_weighting_details      
 'w=1/[\s^2^(Fo^2^)+(0.0415P)^2^+0.7968P] where P=(Fo^2^+2Fc^2^)/3'
_refine_ls_weighting_scheme        calc
_refine_ls_wR_factor_gt            0.0877
_refine_ls_wR_factor_ref           0.0908
_refine_special_details            ?
_olex2_refinement_description
;
1. Fixed Uiso
 At 1.2 times of:
  All C(H) groups
2.a Aromatic/amide H refined with riding coordinates:
 C3(H3), C4(H4), C5(H5), C6(H6), C8(H8), C9(H9), C10(H10), C11(H11), C12(H12),
 C13(H13), C14(H14), C15(H15)
;
_atom_sites_solution_hydrogens     geom
_atom_sites_solution_primary       dual
_atom_sites_solution_secondary     ?
loop_
  _atom_site_label
  _atom_site_type_symbol
  _atom_site_fract_x
  _atom_site_fract_y
  _atom_site_fract_z
  _atom_site_U_iso_or_equiv
  _atom_site_adp_type
  _atom_site_occupancy
  _atom_site_site_symmetry_order
  _atom_site_calc_flag
  _atom_site_refinement_flags_posn
  _atom_site_refinement_flags_adp
  _atom_site_refinement_flags_occupancy
  _atom_site_disorder_assembly
  _atom_site_disorder_group
 Ti1 Ti 0.22464(3) 0.78441(5) 0.32403(2) 0.02085(12) Uani 1 1 d . . . . .
 Cl1 Cl 0.09860(6) 1.00929(8) 0.27196(3) 0.03386(16) Uani 1 1 d . . . . .
 Cl2 Cl 0.34984(5) 0.95629(8) 0.39999(3) 0.03681(16) Uani 1 1 d . . . . .
 O1 O 0.11005(14) 0.6652(2) 0.37549(7) 0.0252(3) Uani 1 1 d . . . . .
 C1 C 0.0363(2) 0.5187(3) 0.39949(10) 0.0211(4) Uani 1 1 d . . . . .
 C2 C -0.0996(2) 0.5548(3) 0.41107(10) 0.0218(4) Uani 1 1 d . . . . .
 C3 C -0.1611(2) 0.7315(3) 0.39732(11) 0.0271(5) Uani 1 1 d . . . . .
 H3 H -0.112159 0.828792 0.378423 0.032 Uiso 1 1 calc R . . . .
 C4 C -0.2916(2) 0.7608(3) 0.41151(12) 0.0326(5) Uani 1 1 d . . . . .
 H4 H -0.331361 0.877981 0.402522 0.039 Uiso 1 1 calc R . . . .
 C5 C -0.3662(2) 0.6145(4) 0.43969(12) 0.0368(5) Uani 1 1 d . . . . .
 H5 H -0.455040 0.636074 0.449769 0.044 Uiso 1 1 calc R . . . .
 C6 C -0.3101(2) 0.4406(3) 0.45251(11) 0.0323(5) Uani 1 1 d . . . . .
 H6 H -0.361646 0.344648 0.470511 0.039 Uiso 1 1 calc R . . . .
 C7 C -0.1756(2) 0.4051(3) 0.43882(10) 0.0244(4) Uani 1 1 d . . . . .
 C8 C -0.1149(2) 0.2263(3) 0.45210(11) 0.0285(5) Uani 1 1 d . . . . .
 H8 H -0.164897 0.128268 0.469822 0.034 Uiso 1 1 calc R . . . .
 C9 C 0.0155(2) 0.1979(3) 0.43906(11) 0.0283(5) Uani 1 1 d . . . . .
 H9 H 0.054190 0.079674 0.447396 0.034 Uiso 1 1 calc R . . . .
 C10 C 0.0932(2) 0.3450(3) 0.41307(10) 0.0264(4) Uani 1 1 d . . . . .
 H10 H 0.183102 0.324508 0.405082 0.032 Uiso 1 1 calc R . . . .
 C11 C 0.2378(2) 0.6369(3) 0.21850(11) 0.0329(5) Uani 1 1 d . . . . .
 H11 H 0.167732 0.647021 0.186659 0.039 Uiso 1 1 calc R . . . .
 C12 C 0.3480(2) 0.7602(3) 0.22534(12) 0.0342(5) Uani 1 1 d . . . . .
 H12 H 0.363870 0.865783 0.198825 0.041 Uiso 1 1 calc R . . . .
 C13 C 0.4295(2) 0.6958(4) 0.27922(13) 0.0369(6) Uani 1 1 d . . . . .
 H13 H 0.509913 0.750343 0.294387 0.044 Uiso 1 1 calc R . . . .
 C14 C 0.3689(2) 0.5337(3) 0.30658(13) 0.0359(5) Uani 1 1 d . . . . .
 H14 H 0.401010 0.464713 0.343523 0.043 Uiso 1 1 calc R . . . .
 C15 C 0.2516(2) 0.4952(3) 0.26816(12) 0.0337(5) Uani 1 1 d . . . . .
 H15 H 0.193346 0.394231 0.274318 0.040 Uiso 1 1 calc R . . . .

loop_
  _atom_site_aniso_label
  _atom_site_aniso_U_11
  _atom_site_aniso_U_22
  _atom_site_aniso_U_33
  _atom_site_aniso_U_23
  _atom_site_aniso_U_13
  _atom_site_aniso_U_12
 Ti1 0.0189(2) 0.0205(2) 0.0233(2) 0.00021(14) 0.00269(14) -0.00035(13)
 Cl1 0.0355(3) 0.0295(3) 0.0362(3) 0.0070(2) -0.0032(2) 0.0049(2)
 Cl2 0.0320(3) 0.0369(3) 0.0408(3) -0.0115(2) -0.0065(2) 0.0000(2)
 O1 0.0239(7) 0.0233(7) 0.0290(8) 0.0012(6) 0.0068(6) 0.0003(6)
 C1 0.0256(10) 0.0214(10) 0.0166(9) 0.0005(7) 0.0038(7) -0.0009(7)
 C2 0.0250(10) 0.0248(10) 0.0156(9) -0.0004(8) 0.0011(7) 0.0003(8)
 C3 0.0281(11) 0.0241(10) 0.0292(11) 0.0026(9) 0.0035(9) 0.0014(8)
 C4 0.0301(12) 0.0307(12) 0.0369(13) 0.0019(10) 0.0024(10) 0.0082(9)
 C5 0.0248(11) 0.0475(14) 0.0386(13) 0.0014(11) 0.0077(9) 0.0045(10)
 C6 0.0300(11) 0.0379(13) 0.0293(12) 0.0027(10) 0.0066(9) -0.0067(9)
 C7 0.0291(10) 0.0265(10) 0.0177(10) 0.0001(8) 0.0036(8) -0.0025(8)
 C8 0.0397(12) 0.0234(10) 0.0227(11) 0.0035(8) 0.0037(9) -0.0044(9)
 C9 0.0394(12) 0.0214(10) 0.0242(11) 0.0034(8) 0.0014(9) 0.0054(8)
 C10 0.0275(10) 0.0275(11) 0.0245(11) 0.0018(9) 0.0033(8) 0.0043(8)
 C11 0.0353(12) 0.0371(12) 0.0266(11) -0.0091(10) 0.0060(9) -0.0058(10)
 C12 0.0325(12) 0.0412(13) 0.0299(12) -0.0026(10) 0.0130(10) -0.0074(10)
 C13 0.0233(11) 0.0461(14) 0.0420(14) -0.0102(11) 0.0097(10) -0.0004(10)
 C14 0.0336(12) 0.0338(12) 0.0407(14) -0.0032(10) 0.0087(10) 0.0117(10)
 C15 0.0378(12) 0.0265(11) 0.0377(13) -0.0097(10) 0.0125(10) -0.0023(9)

_geom_special_details
;
 All esds (except the esd in the dihedral angle between two l.s. planes)
 are estimated using the full covariance matrix.  The cell esds are taken
 into account individually in the estimation of esds in distances, angles
 and torsion angles; correlations between esds in cell parameters are only
 used when they are defined by crystal symmetry.  An approximate (isotropic)
 treatment of cell esds is used for estimating esds involving l.s. planes.
;
loop_
  _geom_bond_atom_site_label_1
  _geom_bond_atom_site_label_2
  _geom_bond_distance
  _geom_bond_site_symmetry_2
  _geom_bond_publ_flag
 Ti1 Cl1 2.2517(10) . ?
 Ti1 Cl2 2.2764(10) . ?
 Ti1 O1 1.7788(15) . ?
 Ti1 C11 2.358(2) . ?
 Ti1 C12 2.372(2) . ?
 Ti1 C13 2.350(2) . ?
 Ti1 C14 2.313(2) . ?
 Ti1 C15 2.342(2) . ?
 O1 C1 1.365(2) . ?
 C1 C2 1.410(3) . ?
 C1 C10 1.370(3) . ?
 C2 C3 1.410(3) . ?
 C2 C7 1.424(3) . ?
 C3 H3 0.9300 . ?
 C3 C4 1.360(3) . ?
 C4 H4 0.9300 . ?
 C4 C5 1.402(3) . ?
 C5 H5 0.9300 . ?
 C5 C6 1.366(3) . ?
 C6 H6 0.9300 . ?
 C6 C7 1.405(3) . ?
 C7 C8 1.417(3) . ?
 C8 H8 0.9300 . ?
 C8 C9 1.354(3) . ?
 C9 H9 0.9300 . ?
 C9 C10 1.405(3) . ?
 C10 H10 0.9300 . ?
 C11 H11 0.9300 . ?
 C11 C12 1.403(3) . ?
 C11 C15 1.410(3) . ?
 C12 H12 0.9300 . ?
 C12 C13 1.400(4) . ?
 C13 H13 0.9300 . ?
 C13 C14 1.412(4) . ?
 C14 H14 0.9300 . ?
 C14 C15 1.401(4) . ?
 C15 H15 0.9300 . ?

loop_
  _geom_angle_atom_site_label_1
  _geom_angle_atom_site_label_2
  _geom_angle_atom_site_label_3
  _geom_angle
  _geom_angle_site_symmetry_1
  _geom_angle_site_symmetry_3
  _geom_angle_publ_flag
 Cl1 Ti1 Cl2 102.53(5) . . ?
 Cl1 Ti1 C11 86.92(7) . . ?
 Cl1 Ti1 C12 88.03(7) . . ?
 Cl1 Ti1 C13 119.35(7) . . ?
 Cl1 Ti1 C14 143.80(7) . . ?
 Cl1 Ti1 C15 117.62(7) . . ?
 Cl2 Ti1 C11 141.39(6) . . ?
 Cl2 Ti1 C12 107.62(7) . . ?
 Cl2 Ti1 C13 86.05(7) . . ?
 Cl2 Ti1 C14 100.19(8) . . ?
 Cl2 Ti1 C15 135.16(7) . . ?
 O1 Ti1 Cl1 103.76(6) . . ?
 O1 Ti1 Cl2 102.39(7) . . ?
 O1 Ti1 C11 111.64(8) . . ?
 O1 Ti1 C12 144.45(8) . . ?
 O1 Ti1 C13 133.21(8) . . ?
 O1 Ti1 C14 98.38(9) . . ?
 O1 Ti1 C15 87.36(8) . . ?
 C11 Ti1 C12 34.52(8) . . ?
 C13 Ti1 C11 57.49(9) . . ?
 C13 Ti1 C12 34.49(9) . . ?
 C14 Ti1 C11 58.16(9) . . ?
 C14 Ti1 C12 58.20(9) . . ?
 C14 Ti1 C13 35.24(9) . . ?
 C14 Ti1 C15 35.02(9) . . ?
 C15 Ti1 C11 34.91(8) . . ?
 C15 Ti1 C12 57.87(8) . . ?
 C15 Ti1 C13 57.96(8) . . ?
 C1 O1 Ti1 158.09(13) . . ?
 O1 C1 C2 117.25(17) . . ?
 O1 C1 C10 121.23(18) . . ?
 C10 C1 C2 121.50(18) . . ?
 C1 C2 C7 117.51(18) . . ?
 C3 C2 C1 122.84(18) . . ?
 C3 C2 C7 119.64(19) . . ?
 C2 C3 H3 119.8 . . ?
 C4 C3 C2 120.4(2) . . ?
 C4 C3 H3 119.8 . . ?
 C3 C4 H4 120.0 . . ?
 C3 C4 C5 120.1(2) . . ?
 C5 C4 H4 120.0 . . ?
 C4 C5 H5 119.6 . . ?
 C6 C5 C4 120.8(2) . . ?
 C6 C5 H5 119.6 . . ?
 C5 C6 H6 119.6 . . ?
 C5 C6 C7 120.8(2) . . ?
 C7 C6 H6 119.6 . . ?
 C6 C7 C2 118.2(2) . . ?
 C6 C7 C8 121.8(2) . . ?
 C8 C7 C2 119.99(19) . . ?
 C7 C8 H8 119.9 . . ?
 C9 C8 C7 120.2(2) . . ?
 C9 C8 H8 119.9 . . ?
 C8 C9 H9 119.6 . . ?
 C8 C9 C10 120.77(19) . . ?
 C10 C9 H9 119.6 . . ?
 C1 C10 C9 120.01(19) . . ?
 C1 C10 H10 120.0 . . ?
 C9 C10 H10 120.0 . . ?
 Ti1 C11 H11 120.7 . . ?
 C12 C11 Ti1 73.26(13) . . ?
 C12 C11 H11 125.8 . . ?
 C12 C11 C15 108.3(2) . . ?
 C15 C11 Ti1 71.93(13) . . ?
 C15 C11 H11 125.8 . . ?
 Ti1 C12 H12 121.5 . . ?
 C11 C12 Ti1 72.22(13) . . ?
 C11 C12 H12 126.1 . . ?
 C13 C12 Ti1 71.93(14) . . ?
 C13 C12 C11 107.8(2) . . ?
 C13 C12 H12 126.1 . . ?
 Ti1 C13 H13 121.3 . . ?
 C12 C13 Ti1 73.59(13) . . ?
 C12 C13 H13 125.9 . . ?
 C12 C13 C14 108.3(2) . . ?
 C14 C13 Ti1 70.95(13) . . ?
 C14 C13 H13 125.9 . . ?
 Ti1 C14 H14 118.4 . . ?
 C13 C14 Ti1 73.81(14) . . ?
 C13 C14 H14 126.1 . . ?
 C15 C14 Ti1 73.62(13) . . ?
 C15 C14 C13 107.8(2) . . ?
 C15 C14 H14 126.1 . . ?
 Ti1 C15 H15 121.1 . . ?
 C11 C15 Ti1 73.17(13) . . ?
 C11 C15 H15 126.1 . . ?
 C14 C15 Ti1 71.36(13) . . ?
 C14 C15 C11 107.8(2) . . ?
 C14 C15 H15 126.1 . . ?

loop_
  _geom_torsion_atom_site_label_1
  _geom_torsion_atom_site_label_2
  _geom_torsion_atom_site_label_3
  _geom_torsion_atom_site_label_4
  _geom_torsion
  _geom_torsion_site_symmetry_1
  _geom_torsion_site_symmetry_2
  _geom_torsion_site_symmetry_3
  _geom_torsion_site_symmetry_4
  _geom_torsion_publ_flag
 Ti1 O1 C1 C2 -134.1(3) . . . . ?
 Ti1 O1 C1 C10 47.2(5) . . . . ?
 Ti1 C11 C12 C13 63.59(17) . . . . ?
 Ti1 C11 C15 C14 -63.41(16) . . . . ?
 Ti1 C12 C13 C14 62.90(16) . . . . ?
 Ti1 C13 C14 C15 66.30(16) . . . . ?
 Ti1 C14 C15 C11 64.59(16) . . . . ?
 Cl1 Ti1 O1 C1 118.5(4) . . . . ?
 Cl2 Ti1 O1 C1 -135.1(4) . . . . ?
 O1 C1 C2 C3 1.7(3) . . . . ?
 O1 C1 C2 C7 -177.35(17) . . . . ?
 O1 C1 C10 C9 178.68(19) . . . . ?
 C1 C2 C3 C4 -177.8(2) . . . . ?
 C1 C2 C7 C6 178.14(19) . . . . ?
 C1 C2 C7 C8 -1.7(3) . . . . ?
 C2 C1 C10 C9 0.1(3) . . . . ?
 C2 C3 C4 C5 -0.3(4) . . . . ?
 C2 C7 C8 C9 0.6(3) . . . . ?
 C3 C2 C7 C6 -0.9(3) . . . . ?
 C3 C2 C7 C8 179.30(19) . . . . ?
 C3 C4 C5 C6 -0.8(4) . . . . ?
 C4 C5 C6 C7 1.1(4) . . . . ?
 C5 C6 C7 C2 -0.2(3) . . . . ?
 C5 C6 C7 C8 179.6(2) . . . . ?
 C6 C7 C8 C9 -179.2(2) . . . . ?
 C7 C2 C3 C4 1.2(3) . . . . ?
 C7 C8 C9 C10 0.8(3) . . . . ?
 C8 C9 C10 C1 -1.2(3) . . . . ?
 C10 C1 C2 C3 -179.7(2) . . . . ?
 C10 C1 C2 C7 1.3(3) . . . . ?
 C11 Ti1 O1 C1 26.4(4) . . . . ?
 C11 C12 C13 Ti1 -63.78(16) . . . . ?
 C11 C12 C13 C14 -0.9(3) . . . . ?
 C12 Ti1 O1 C1 12.2(4) . . . . ?
 C12 C11 C15 Ti1 64.71(16) . . . . ?
 C12 C11 C15 C14 1.3(3) . . . . ?
 C12 C13 C14 Ti1 -64.60(17) . . . . ?
 C12 C13 C14 C15 1.7(3) . . . . ?
 C13 Ti1 O1 C1 -38.8(4) . . . . ?
 C13 C14 C15 Ti1 -66.43(16) . . . . ?
 C13 C14 C15 C11 -1.8(2) . . . . ?
 C14 Ti1 O1 C1 -32.6(4) . . . . ?
 C15 Ti1 O1 C1 0.7(4) . . . . ?
 C15 C11 C12 Ti1 -63.84(16) . . . . ?
 C15 C11 C12 C13 -0.3(3) . . . . ?

_shelx_res_file
;
TITL test P -1 R New: P21/c
    d196m.res
    created by SHELXL-2018/3 at 14:54:54 on 19-Oct-2018
CELL 0.71073 9.989 7.039 19.978 90 92.25 90
ZERR 4 0.006 0.004 0.011 0 0 0
LATT 1
SYMM -X,0.5+Y,0.5-Z
SFAC C H Cl O Ti
UNIT 60 48 8 4 4

L.S. 10
PLAN  -2
SIZE 0.15 0.16 0.17
TEMP 0
CONF
BOND $H
fmap 2
acta
OMIT 1 0 0
OMIT 5 0 4
REM <olex2.extras>
REM <HklSrc "%.\\D196m.hkl">
REM </olex2.extras>

WGHT    0.041500    0.796800
FVAR       0.61534
TI1   5    0.224640    0.784409    0.324029    11.00000    0.01890    0.02050 =
         0.02330    0.00021    0.00269   -0.00035
CL1   3    0.098603    1.009289    0.271956    11.00000    0.03551    0.02951 =
         0.03619    0.00700   -0.00318    0.00487
CL2   3    0.349845    0.956293    0.399994    11.00000    0.03203    0.03695 =
         0.04081   -0.01155   -0.00654    0.00001
O1    4    0.110047    0.665162    0.375491    11.00000    0.02390    0.02328 =
         0.02896    0.00120    0.00677    0.00034
C1    1    0.036342    0.518682    0.399495    11.00000    0.02561    0.02140 =
         0.01664    0.00055    0.00385   -0.00093
C2    1   -0.099646    0.554791    0.411069    11.00000    0.02496    0.02482 =
         0.01559   -0.00041    0.00109    0.00028
C3    1   -0.161125    0.731540    0.397321    11.00000    0.02811    0.02411 =
         0.02917    0.00258    0.00353    0.00138
AFIX  43
H3    2   -0.112159    0.828792    0.378423    11.00000   -1.20000
AFIX   0
C4    1   -0.291602    0.760788    0.411515    11.00000    0.03013    0.03070 =
         0.03692    0.00193    0.00238    0.00822
AFIX  43
H4    2   -0.331361    0.877981    0.402522    11.00000   -1.20000
AFIX   0
C5    1   -0.366220    0.614475    0.439685    11.00000    0.02478    0.04750 =
         0.03861    0.00145    0.00768    0.00454
AFIX  43
H5    2   -0.455040    0.636074    0.449769    11.00000   -1.20000
AFIX   0
C6    1   -0.310132    0.440607    0.452509    11.00000    0.03004    0.03794 =
         0.02927    0.00266    0.00659   -0.00675
AFIX  43
H6    2   -0.361646    0.344648    0.470511    11.00000   -1.20000
AFIX   0
C7    1   -0.175575    0.405063    0.438825    11.00000    0.02911    0.02649 =
         0.01766    0.00008    0.00360   -0.00254
C8    1   -0.114937    0.226345    0.452098    11.00000    0.03967    0.02342 =
         0.02268    0.00351    0.00372   -0.00440
AFIX  43
H8    2   -0.164897    0.128268    0.469822    11.00000   -1.20000
AFIX   0
C9    1    0.015504    0.197928    0.439058    11.00000    0.03937    0.02136 =
         0.02423    0.00336    0.00141    0.00540
AFIX  43
H9    2    0.054190    0.079674    0.447396    11.00000   -1.20000
AFIX   0
C10   1    0.093151    0.345024    0.413069    11.00000    0.02747    0.02747 =
         0.02455    0.00183    0.00328    0.00430
AFIX  43
H10   2    0.183102    0.324508    0.405082    11.00000   -1.20000
AFIX   0
C11   1    0.237823    0.636935    0.218500    11.00000    0.03529    0.03706 =
         0.02659   -0.00912    0.00599   -0.00584
AFIX  43
H11   2    0.167732    0.647021    0.186659    11.00000   -1.20000
AFIX   0
C12   1    0.347951    0.760195    0.225341    11.00000    0.03254    0.04121 =
         0.02985   -0.00258    0.01301   -0.00743
AFIX  43
H12   2    0.363870    0.865783    0.198825    11.00000   -1.20000
AFIX   0
C13   1    0.429541    0.695761    0.279217    11.00000    0.02328    0.04610 =
         0.04203   -0.01015    0.00975   -0.00036
AFIX  43
H13   2    0.509913    0.750343    0.294387    11.00000   -1.20000
AFIX   0
C14   1    0.368870    0.533672    0.306576    11.00000    0.03355    0.03384 =
         0.04074   -0.00322    0.00874    0.01168
AFIX  43
H14   2    0.401010    0.464713    0.343523    11.00000   -1.20000
AFIX   0
C15   1    0.251633    0.495203    0.268161    11.00000    0.03782    0.02654 =
         0.03775   -0.00973    0.01250   -0.00235
AFIX  43
H15   2    0.193346    0.394231    0.274318    11.00000   -1.20000
AFIX   0
HKLF 4 1 0 0 0.5 0 -1 0 1 0 0


REM  test P -1 R New: P21/c
REM wR2 = 0.0908, GooF = S = 1.047, Restrained GooF = 1.047 for all data
REM R1 = 0.0365 for 2567 Fo > 4sig(Fo) and 0.0413 for all 2848 data
REM 172 parameters refined using 0 restraints

END

WGHT      0.0415      0.7969

REM Highest difference peak  0.437,  deepest hole -0.420,  1-sigma level  0.085
Q1    1  -0.0371  0.5364  0.4092  11.00000  0.05    0.44
Q2    1   0.3835  1.0076  0.3653  11.00000  0.05    0.40
;
_shelx_res_checksum                75920
_shelx_hkl_file
;
   1   0   1   -2.51    0.25
   2   0   2 2551.30   98.75
   3   0   3   -1.81    0.68
   4   0   4  503.17   21.05
   5   0   5   -0.31    1.08
   6   0   6 1550.17   61.83
   7   0   7    0.93    1.50
   8   0   8 3566.29  139.93
   9   0   9    2.00    1.78
   9   0   9   -0.13    0.94
  10   0  10  168.73    9.86
  10   0  10  154.55    8.47
  11   0  11   -0.45    1.40
  11   0  11   -1.29    1.29
  12   0  12  719.08   32.69
  13   0  13    1.77    2.04
  14   0  14  132.94    9.78
  15   0  15   -0.13    2.00
  16   0  16  400.78   22.01
  17   0  17    4.54    2.45
  16   0  17    2.09    2.20
  15   0  16    1.31    2.43
  14   0  15   -0.35    1.81
  13   0  14   -0.65    1.94
  12   0  13   -2.09    1.55
  11   0  12    0.25    2.02
  10   0  11    1.74    1.90
  10   0  11    2.23    1.31
   9   0  10    5.85    2.16
   8   0   9    0.76    1.67
   7   0   8    2.67    1.80
   6   0   7    1.13    1.26
   5   0   6   -1.35    1.09
   4   0   5    1.21    1.04
   3   0   4   -0.94    0.91
  -2   0  -3   -0.02    0.44
   2   0   3    0.57    0.56
   1   0   2    0.21    0.23
  -1   0  -2   -0.21    0.12
   3   0   2    0.40    0.64
   4   0   3   -2.68    0.92
   5   0   4    1.97    1.15
   6   0   5    0.22    1.06
   7   0   6   -0.41    0.72
   7   0   6    0.24    1.18
   8   0   7    0.56    1.54
   8   0   7   -0.74    0.92
   9   0   8    1.91    1.49
   9   0   8    2.97    1.26
  10   0   9   -0.21    0.86
  10   0   9    0.57    1.59
  11   0  10   -1.42    1.32
  11   0  10   -0.63    1.08
  12   0  11   -0.21    1.16
  12   0  11    0.61    2.16
  13   0  12   -0.36    1.74
  14   0  13   -0.09    1.53
  15   0  14    0.91    2.33
  16   0  15    2.07    2.27
  17   0  16    7.13    3.01
  16   0  18   51.03    7.21
  15   0  17    0.63    2.35
  14   0  16  301.35   17.36
  13   0  15    1.34    2.09
  12   0  14   27.99    5.08
  11   0  13   -1.07    1.61
  10   0  12  717.56   32.07
   9   0  11   -1.66    1.43
   8   0  10  175.14   10.01
   7   0   9   -0.42    1.49
   6   0   8 1122.99   45.89
   5   0   7   -1.34    1.10
   4   0   6   14.48    2.16
   3   0   5   -6.06    0.99
  -3   0  -5   -6.18    0.77
  -1   0  -3    0.80    0.44
  -1   0  -3    0.88    0.39
   1   0   3    0.50    0.45
   0   0  -2  506.88   20.69
   1   0  -1   -0.71    0.17
   2   0   0 1674.55   67.12
   3   0   1    1.72    0.57
   4   0   2 9900.50  384.35
   5   0   3   -5.30    0.77
   5   0   3   -5.16    1.07
   6   0   4    2.64    1.27
   6   0   4    1.49    0.88
   7   0   5   -0.72    0.89
   7   0   5   -1.41    0.91
   8   0   6 2990.36  121.91
   8   0   6 3080.71  119.09
   9   0   7   -2.19    1.07
   9   0   7   -2.29    1.45
  10   0   8   61.41    4.31
  10   0   8   58.63    5.04
  11   0   9   -0.92    1.08
  11   0   9   -0.01    1.59
  12   0  10    6.30    1.95
  12   0  10    5.61    2.64
  13   0  11   -1.97    1.97
  14   0  12    3.84    2.26
  15   0  13    0.14    2.14
  16   0  14  202.64   13.27
  17   0  15    0.20    2.28
  18   0  16   19.90    4.61
  15   0  18    0.47    1.94
  14   0  17    1.17    2.53
  13   0  16    2.30    2.35
  12   0  15    0.19    2.14
  11   0  14   -0.20    2.05
  10   0  13    1.12    2.21
   9   0  12   -1.37    1.39
   8   0  11    0.86    1.59
   7   0  10   -0.97    1.36
   6   0   9    0.09    1.52
   5   0   8   -2.22    0.86
   4   0   7    1.73    1.21
  -4   0  -7    0.51    0.62
   3   0   6   -1.09    0.77
  -3   0  -6   -0.27    0.68
   2   0   5    0.74    0.90
  -2   0  -5   -0.50    0.52
  -1   0  -4    0.42    0.56
   0   0   3   -0.01    0.27
   0   0  -3   -0.08    0.39
   0   0  -3   -0.57    0.28
   1   0  -2   -1.35    0.11
   1   0  -2   -0.86    0.28
   2   0  -1   -5.73    0.62
   3   0   0  -10.86    0.57
   3   0   0   -8.83    0.79
   4   0   1   -0.74    0.48
   4   0   1   -0.31    0.48
   5   0   2    0.13    0.81
   5   0   2    0.14    0.22
   6   0   3   -0.63    0.45
   6   0   3   -1.13    0.93
   7   0   4    0.29    1.12
   7   0   4   -0.08    0.81
   8   0   5   -0.08    0.96
   8   0   5    1.28    1.36
   9   0   6    0.35    1.08
   9   0   6    1.20    1.45
  10   0   7   -2.31    1.01
  10   0   7    0.84    1.21
  11   0   8    0.95    1.24
  11   0   8    1.52    1.72
  12   0   9    1.26    1.54
  12   0   9    0.65    1.32
  13   0  10    0.84    1.92
  13   0  10    0.33    1.20
  14   0  11   -0.95    1.26
  15   0  12    0.75    1.90
  16   0  13    0.02    1.98
  17   0  14    1.04    2.33
  18   0  15    0.42    1.98
  15   0  19    1.44    2.26
  14   0  18  137.66   10.71
  13   0  17    1.64    2.00
  12   0  16  187.41   12.50
  11   0  15   -3.09    1.78
  10   0  14  478.13   23.25
   9   0  13   -1.08    1.61
   8   0  12   35.28    4.53
   7   0  11   -0.42    1.40
   6   0  10 5154.10  200.85
   5   0   9    0.44    1.06
  -3   0  -7    0.46    0.92
   3   0   7   -0.97    0.98
  -1   0  -5    0.34    0.64
   1   0   5   -0.09    0.76
  -1   0  -5   -0.53    0.38
   1   0  -3   -0.40    0.36
   1   0  -3   -0.26    0.23
  -1   0   3    0.29    0.35
   2   0  -2  665.14   27.17
   3   0  -1    0.03    0.28
   3   0  -1   -0.06    0.50
   4   0   0  454.72   19.07
   5   0   1    0.86    0.82
   5   0   1   -0.44    0.66
   7   0   3   -0.46    0.34
   7   0   3    0.58    1.07
   8   0   4 1109.65   44.90
   8   0   4 1115.42   45.88
   9   0   5   -0.58    1.21
   9   0   5    1.17    1.41
  10   0   6 4408.34  172.69
  10   0   6 4437.04  177.43
  11   0   7    2.26    1.74
  11   0   7    1.77    1.35
  12   0   8  195.68   11.28
  12   0   8  206.04   10.70
  13   0   9    4.56    1.82
  13   0   9    4.18    1.56
  14   0  10  160.57    8.99
  14   0  10  142.33    9.83
  15   0  11   -1.27    1.60
  16   0  12   93.05    8.05
  17   0  13    2.11    2.45
  18   0  14  528.72   26.95
  19   0  15    1.44    2.09
  14   0  19   -0.74    1.71
  13   0  18    0.61    2.26
  12   0  17    3.29    2.91
  11   0  16   -0.11    2.04
  10   0  15   -0.72    1.66
   9   0  14    0.33    1.93
   8   0  13   -0.38    1.66
   7   0  12    0.40    1.50
   6   0  11    2.37    1.61
  -5   0 -10    0.64    1.12
   5   0  10   -0.30    1.34
  -4   0  -9    1.49    1.10
   4   0   9    0.85    1.29
   3   0   8   -0.69    0.92
  -3   0  -8    1.05    0.89
   2   0   7   -1.78    0.94
  -2   0  -7   -1.27    0.73
  -2   0  -7    0.09    0.70
   1   0   6   -8.07    0.88
  -1   0  -6   -7.36    0.76
  -1   0  -6   -9.79    0.54
   0   0   5   -0.39    0.55
   0   0  -5   -0.74    0.59
   0   0  -5   -0.41    0.56
  -1   0   4   -0.84    0.43
   1   0  -4   -1.07    0.42
   1   0  -4    0.24    0.73
  -2   0   3   -0.74    0.27
   2   0  -3   -0.10    0.60
   3   0  -2   -1.74    0.88
   4   0  -1   -0.55    0.42
   4   0  -1   -0.53    0.71
   5   0   0   -1.02    0.77
   5   0   0   -0.76    0.64
   6   0   1   -2.10    0.75
   6   0   1   -1.56    0.82
   7   0   2    0.13    0.97
   7   0   2   -2.47    0.80
   8   0   3    1.37    1.19
   8   0   3   -0.26    0.39
   9   0   4    0.14    0.65
   9   0   4    1.01    1.28
  10   0   5    0.70    1.47
  10   0   5   -0.41    1.16
  11   0   6    1.00    1.75
  11   0   6    2.44    1.35
  12   0   7   -0.46    1.26
  12   0   7    0.47    1.48
  13   0   8   -0.21    1.17
  13   0   8    2.41    1.82
  14   0   9   -1.21    1.68
  14   0   9    1.58    1.06
  15   0  10    1.61    1.81
  16   0  11    0.16    1.64
  17   0  12    0.50    2.10
  18   0  13    2.25    2.45
  19   0  14    3.04    2.54
  14   0  20   78.45    7.84
  13   0  19    0.78    1.96
  12   0  18  528.57   26.76
  11   0  17    0.27    2.19
  10   0  16   72.56    6.62
   9   0  15    3.34    2.07
   8   0  14  143.57    9.47
   7   0  13    0.52    1.50
   6   0  12  224.52   12.06
   5   0  11  388.36   18.13
  -4   0 -10  130.69    7.61
  -3   0  -9   -0.78    0.66
   3   0   9   -0.65    1.12
   2   0   8   56.85    3.75
  -2   0  -8   40.87    3.35
  -1   0  -7   -0.67    0.60
   1   0   7   -0.07    0.95
  -1   0  -7   -0.44    0.73
   0   0  -6  230.69   10.55
   0   0  -6  246.48   10.95
   1   0  -5   -0.88    0.69
  -1   0   5   -1.63    0.52
   1   0  -5   -0.85    0.56
  -2   0   4 1005.76   38.66
   2   0  -4  972.04   40.21
  -3   0   3   -1.22    0.25
   3   0  -3   -2.08    0.55
  -3   0   3   -0.88    0.29
   4   0  -2 6244.15  249.82
   4   0  -2 6618.64  258.54
   5   0  -1   -0.52    0.43
   5   0  -1   -0.29    0.74
   6   0   0 9486.25  379.72
   7   0   1    0.24    0.94
   7   0   1   -1.54    0.77
   8   0   2   20.25    2.35
   8   0   2   17.87    2.19
   9   0   3    1.50    1.21
   9   0   3    0.29    0.59
  11   0   5    1.19    1.17
  11   0   5   -1.03    1.40
  12   0   6  513.74   22.99
  12   0   6  510.47   22.98
  13   0   7    0.32    1.56
  13   0   7    0.33    1.20
  14   0   8   10.07    2.17
  14   0   8   12.01    3.12
  15   0   9   -0.93    1.76
  15   0   9    0.44    1.39
  16   0  10    4.96    2.37
  17   0  11   -3.50    1.80
  18   0  12   63.38    6.65
  19   0  13    0.26    2.07
  13   0  20    2.45    1.87
  12   0  19    6.11    2.66
  11   0  18    0.15    2.17
  10   0  17   -2.20    1.68
   9   0  16    0.59    1.84
   8   0  15    1.47    2.03
   7   0  14    1.99    1.81
   6   0  13    0.29    1.81
   5   0  12    0.50    1.45
  -5   0 -12    0.58    1.04
  -4   0 -11   -0.32    0.99
   4   0  11    0.45    1.48
   3   0  10    0.02    1.03
  -3   0 -10    0.39    0.97
   2   0   9   -0.36    0.92
  -2   0  -9   -0.15    0.63
  -2   0  -9    0.68    0.88
  -1   0  -8   -2.52    1.02
  -1   0  -8   -1.72    0.94
   1   0   8   -3.21    0.93
   0   0   7   -2.58    0.67
   0   0  -7    0.61    1.01
   0   0  -7   -0.88    1.13
   1   0  -6    1.84    0.97
   1   0  -6   -0.71    0.57
  -1   0   6   -0.32    0.69
  -2   0   5    0.46    0.67
   2   0  -5   -0.24    0.31
   2   0  -5   -0.22    0.69
  -3   0   4   -5.87    0.45
   3   0  -4   -5.57    0.86
   4   0  -3   -3.97    0.30
   4   0  -3   -3.66    0.97
   5   0  -2   -0.33    0.39
   5   0  -2   -0.82    0.93
   6   0  -1   -0.93    0.64
   6   0  -1   -1.94    0.98
   7   0   0   -0.79    0.96
   7   0   0    0.16    0.88
   8   0   1    0.34    1.02
   8   0   1    1.51    1.20
   9   0   2    0.43    1.17
   9   0   2   -1.95    0.89
  10   0   3   -1.06    0.99
  10   0   3   -0.36    0.91
  11   0   4    0.22    0.39
  11   0   4    0.45    1.29
  12   0   5   -0.42    1.39
  12   0   5    0.08    1.03
  13   0   6    2.15    1.64
  13   0   6   -1.10    1.16
  14   0   7    0.51    1.09
  14   0   7    0.39    1.44
  15   0   8   -1.08    1.38
  15   0   8    1.33    1.41
  16   0   9   -1.26    1.64
  16   0   9    1.67    1.39
  17   0  10    1.26    1.76
  18   0  11   -1.96    1.76
  19   0  12    2.43    1.95
  20   0  13    0.14    2.12
  12   0  20   28.21    5.41
  11   0  19    1.20    2.21
  10   0  18   97.89    8.35
   9   0  17    0.06    2.14
   8   0  16   64.86    6.18
   7   0  15    1.33    1.93
   6   0  14  377.74   18.58
  -5   0 -13    0.16    0.97
   5   0  13    0.42    1.61
  -4   0 -12  234.24   12.34
  -3   0 -11   -0.90    0.98
   3   0  11   -0.13    1.33
  -2   0 -10  102.63    5.95
  -2   0 -10   85.69    5.03
   2   0  10   94.66    5.85
  -1   0  -9   -0.42    0.64
   1   0   9    0.35    1.07
  -1   0  -9    0.14    0.77
   0   0  -8 2391.98  100.99
   0   0  -8 2597.34  100.46
  -1   0   7   -0.89    0.87
   1   0  -7   -1.67    0.88
   1   0  -7   -1.98    0.79
   2   0  -6  159.60    7.44
  -2   0   6  146.47    6.91
   3   0  -5   -0.06    0.77
   3   0  -5   -0.05    0.16
  -3   0   5   -0.19    0.44
   4   0  -4 1229.89   52.02
  -4   0   4 1300.05   46.97
  -4   0   4 1304.05   49.71
   5   0  -3   -1.86    0.25
   5   0  -3   -1.17    0.94
   6   0  -2   48.09    2.42
   6   0  -2   35.98    3.06
   7   0  -1   -0.41    1.03
   7   0  -1   -0.41    0.67
   8   0   0 1475.87   60.97
   8   0   0 1504.35   58.57
   9   0   1   -1.06    0.81
   9   0   1    0.40    1.00
  10   0   2  453.00   19.00
  10   0   2  420.07   19.49
  11   0   3    3.48    1.49
  11   0   3    1.34    1.45
  12   0   4 2885.93  113.74
  13   0   5    0.36    1.44
  13   0   5    1.02    0.75
  14   0   6   52.77    4.46
  14   0   6   57.06    5.08
  15   0   7    0.21    1.57
  15   0   7    2.53    1.43
  16   0   8  157.89   10.28
  16   0   8  167.24    9.74
  17   0   9    0.91    1.96
  18   0  10  417.71   21.43
  19   0  11    0.09    2.08
  20   0  12  276.88   16.50
  12   0  21   -3.02    1.33
  11   0  20    0.77    2.01
  10   0  19    1.92    2.19
   9   0  18   -1.27    1.71
   8   0  17   -1.19    1.74
   7   0  16    0.12    1.80
  -5   0 -14    1.15    1.11
   5   0  14    1.19    1.79
   4   0  13   -0.62    1.36
  -4   0 -13    0.14    0.79
  -3   0 -12    4.17    2.01
   3   0  12    1.34    1.80
   2   0  11    0.67    1.32
  -2   0 -11   -0.75    0.79
  -2   0 -11    0.65    0.88
  -1   0 -10   -0.58    0.72
  -1   0 -10   -0.40    0.78
   1   0  10   -0.83    0.99
   0   0  -9    2.22    1.11
   0   0   9   -0.22    0.79
   0   0  -9    3.21    1.17
  -1   0   8   -1.82    0.74
   1   0  -8    2.10    1.21
   1   0  -8   -0.89    0.91
  -2   0   7    2.11    0.97
   2   0  -7    1.94    1.15
   2   0  -7    2.14    0.94
   3   0  -6   -0.44    0.23
  -3   0   6    0.56    0.63
   3   0  -6   -0.40    0.79
  -4   0   5   -2.75    0.40
   4   0  -5   -2.21    0.98
   5   0  -4   -1.77    0.82
   5   0  -4   -0.48    0.36
   6   0  -3   -0.83    0.97
   6   0  -3   -0.16    0.36
   7   0  -2    2.14    1.37
   7   0  -2    0.28    0.59
   8   0  -1    2.68    1.03
   9   0   0    2.80    1.51
   9   0   0   -0.55    0.92
  10   0   1    3.10    1.40
  10   0   1    1.80    1.11
  11   0   2   -0.79    1.07
  11   0   2   -0.34    1.14
  12   0   3   -1.32    1.18
  12   0   3   -0.61    1.46
  13   0   4    1.01    1.38
  13   0   4    1.86    1.58
  14   0   5   -0.20    0.50
  14   0   5    1.19    1.34
  15   0   6    3.82    1.49
  15   0   6   -0.53    1.18
  16   0   7   -0.19    1.51
  16   0   7    1.42    1.23
  17   0   8   -0.15    1.39
  17   0   8    1.65    2.21
  18   0   9    1.11    1.83
  19   0  10    0.47    1.92
  20   0  11   -0.55    1.49
  21   0  12    0.10    2.04
  11   0  21    1.43    2.12
  10   0  20  666.62   32.42
   9   0  19   -1.73    1.64
   8   0  18   30.02    5.08
   7   0  17    0.85    1.72
   6   0  16    6.58    2.73
  -5   0 -15    0.26    1.14
   5   0  15   -1.54    1.48
   4   0  14 1097.13   46.55
  -4   0 -14 1123.75   48.03
  -3   0 -13    0.67    1.02
   3   0  13    0.70    1.30
  -2   0 -12 6097.45  253.41
   2   0  12 6309.95  246.57
  -2   0 -12 6657.76  255.50
   1   0  11   -1.15    0.82
  -1   0 -11    0.04    0.83
  -1   0 -11    0.28    1.06
   0   0 -10  133.08    7.50
   0   0 -10  135.84    7.05
   1   0  -9   -1.69    0.99
  -1   0   9   -1.89    0.79
   1   0  -9   -0.71    0.89
  -2   0   8  757.66   32.07
   2   0  -8  827.61   33.56
   2   0  -8  808.58   33.42
   3   0  -7   -0.68    0.78
   3   0  -7    0.19    0.48
  -3   0   7    0.02    0.66
   4   0  -6  641.34   27.32
  -4   0   6  652.30   25.66
  -5   0   5   -0.27    0.26
   5   0  -5   -0.67    0.98
  -5   0   5    0.20    0.38
   6   0  -4 2820.48  114.86
   6   0  -4 2881.82  110.23
   7   0  -3    0.53    0.35
   7   0  -3    0.26    1.19
   8   0  -2  275.79   13.11
   9   0  -1   -1.23    0.73
   9   0  -1    0.79    1.17
  10   0   0  843.49   35.55
  10   0   0  817.87   33.62
  11   0   1    0.05    1.10
  11   0   1    0.04    1.31
  12   0   2 1108.21   44.77
  12   0   2 1092.62   46.45
  13   0   3   -0.39    1.41
  13   0   3    0.84    1.57
  14   0   4  998.18   41.01
  14   0   4  962.37   42.06
  15   0   5    1.13    1.64
  15   0   5    0.77    0.70
  16   0   6    9.54    2.75
  16   0   6    9.99    2.42
  17   0   7    0.18    1.88
  17   0   7   -1.35    1.48
  18   0   8   26.36    4.41
  18   0   8   38.52    4.86
  19   0   9    0.29    1.90
  20   0  10   -0.41    2.10
  21   0  11    1.54    2.23
  10   0  21   -0.97    1.68
   9   0  20    1.78    2.50
   8   0  19   -1.88    1.71
   7   0  18   -0.44    1.51
   6   0  17    0.66    1.90
   5   0  16   -1.12    1.51
  -5   0 -16    1.13    1.57
  -4   0 -15   -0.31    1.07
   4   0  15    0.43    1.33
  -3   0 -14    2.44    1.56
   3   0  14    1.38    1.60
   2   0  13    3.53    1.58
  -2   0 -13    2.13    1.33
  -2   0 -13   -0.71    0.93
   1   0  12   -1.42    1.25
  -1   0 -12    3.85    1.49
  -1   0 -12    1.79    1.46
   0   0 -11   -0.69    0.90
   0   0  11   -1.59    0.58
   0   0 -11    1.05    1.03
   1   0 -10   -0.24    1.01
  -1   0  10   -0.71    1.01
   1   0 -10   -1.71    0.90
   2   0  -9    0.99    1.07
  -2   0   9   -0.11    0.85
   2   0  -9    0.14    0.77
  -3   0   8    0.27    0.71
   3   0  -8    0.34    0.54
   3   0  -8    1.10    0.94
   4   0  -7    0.11    0.36
  -4   0   7    0.61    0.65
   4   0  -7    1.28    1.07
   5   0  -6   -0.22    1.35
  -5   0   6   -2.03    0.39
   6   0  -5   -0.61    1.14
  -6   0   5   -0.45    0.31
  -6   0   5   -1.08    0.30
   7   0  -4    1.56    1.28
   7   0  -4    0.48    0.32
   8   0  -3   -0.14    0.44
   8   0  -3    0.35    1.17
   9   0  -2   -0.71    0.82
   9   0  -2    1.08    1.47
  10   0  -1    5.26    1.81
  11   0   0    1.89    1.67
  11   0   0    0.22    1.09
  12   0   1   -0.91    1.12
  12   0   1    0.90    1.52
  13   0   2    0.42    1.18
  13   0   2    1.72    1.65
  14   0   3    1.83    1.40
  14   0   3    0.26    1.35
  15   0   4   -0.45    1.11
  15   0   4    2.52    1.54
  16   0   5   -0.86    1.11
  16   0   5   -1.08    0.59
  17   0   6    0.56    1.22
  17   0   6   -0.40    1.62
  18   0   7   -0.57    1.80
  18   0   7    1.65    2.00
  19   0   8    0.07    1.79
  20   0   9   -1.23    1.74
  21   0  10    1.75    1.94
  10   0  22   38.68    6.18
   9   0  21    1.38    2.35
   8   0  20    5.99    2.71
   7   0  19    0.11    2.01
   6   0  18   55.12    6.28
  -5   0 -17    0.20    1.41
   5   0  17   -0.71    1.66
  -4   0 -16  199.50   11.46
   4   0  16  174.60   10.92
  -3   0 -15   -0.13    1.12
   3   0  15   -0.95    1.54
  -2   0 -14   32.06    3.92
  -2   0 -14   27.51    3.02
   2   0  14   31.50    3.93
  -1   0 -13    0.20    1.01
  -1   0 -13    0.27    1.14
   0   0 -12  332.34   15.73
   0   0 -12  320.11   15.05
  -1   0  11   -0.49    0.95
   1   0 -11    0.17    0.83
   1   0 -11   -0.08    0.89
   2   0 -10  813.05   34.03
  -2   0  10  765.35   32.61
   2   0 -10  824.24   33.92
   3   0  -9   -0.03    1.14
   3   0  -9   -0.99    0.57
  -3   0   9   -0.25    0.74
   4   0  -8  329.53   14.92
  -4   0   8  318.76   13.66
   5   0  -7    0.77    1.12
   5   0  -7   -0.16    0.32
  -5   0   7   -0.36    0.44
   6   0  -6  900.42   37.41
  -6   0   6  867.18   34.66
   7   0  -5    0.12    0.28
   7   0  -5   -0.43    1.17
   8   0  -4  558.51   22.57
   8   0  -4  580.51   25.00
   9   0  -3   -0.52    0.44
   9   0  -3    1.20    1.42
  10   0  -2    0.61    1.38
  10   0  -2    0.54    0.82
  11   0  -1   -0.52    0.81
  11   0  -1   -1.37    1.01
  12   0   0  115.05    7.19
  12   0   0  112.60    6.26
  13   0   1   -2.01    1.16
  13   0   1   -1.38    1.11
  14   0   2  501.64   23.38
  14   0   2  504.65   22.20
  15   0   3   -1.15    1.17
  15   0   3    0.12    1.40
  16   0   4  126.20    8.05
  16   0   4  131.85    8.44
  17   0   5   -0.72    1.23
  17   0   5    1.27    1.54
  19   0   7    1.64    1.90
  19   0   7    0.89    1.94
  20   0   8   54.09    6.39
  21   0   9   -0.18    2.31
  22   0  10  177.32   12.29
   9   0  22    2.62    2.28
   8   0  21   -2.41    1.75
   7   0  20   -0.35    1.76
   6   0  19   -1.30    1.88
  -5   0 -18    1.12    1.73
   5   0  18   -0.82    1.77
   4   0  17    0.42    1.94
  -4   0 -17    1.93    1.87
   3   0  16    0.55    1.77
  -3   0 -16   -1.38    1.50
  -2   0 -15    0.49    1.25
  -2   0 -15    1.23    1.37
   2   0  15    0.65    1.67
   1   0  14   -1.67    1.39
  -1   0 -14    0.06    1.11
  -1   0 -14    2.87    1.66
   0   0 -13    2.92    1.31
   0   0  13    0.13    0.80
   0   0 -13    2.11    1.32
  -1   0  12   -1.42    1.00
   1   0 -12    1.04    1.19
   1   0 -12   -0.46    0.95
   2   0 -11   -0.69    0.75
  -2   0  11   -0.89    0.82
   2   0 -11   -0.87    1.00
  -3   0  10    0.03    0.80
   3   0 -10    3.38    1.46
   3   0 -10    1.39    0.84
   4   0  -9   -1.38    0.97
  -4   0   9    0.42    0.75
   4   0  -9    0.25    0.45
  -5   0   8   -0.07    0.57
   5   0  -8   -0.72    0.91
   5   0  -8   -0.18    0.41
   6   0  -7   -1.05    1.07
  -6   0   7   -0.66    0.41
   7   0  -6   -0.47    1.00
  -7   0   6    0.56    0.29
  -7   0   6    0.84    0.34
   8   0  -5   -1.29    0.33
   8   0  -5   -1.43    1.34
   9   0  -4    0.58    0.43
   9   0  -4    0.30    1.20
  10   0  -3   -0.21    1.44
  10   0  -3   -0.54    0.53
  11   0  -2    0.13    0.70
  11   0  -2   -1.91    1.16
  12   0  -1   -0.96    0.97
  12   0  -1   -0.67    1.41
  13   0   0    2.17    1.69
  13   0   0    0.76    1.37
  14   0   1    4.31    1.75
  14   0   1   -0.70    1.20
  15   0   2    0.94    1.46
  15   0   2    1.87    1.65
  16   0   3    0.35    1.15
  16   0   3   -1.49    1.36
  17   0   4    1.05    1.62
  17   0   4   -0.21    1.65
  18   0   5    1.92    2.17
  18   0   5    0.33    1.79
  19   0   6   -0.31    1.06
  19   0   6    0.08    1.84
  20   0   7   -0.63    1.57
  21   0   8    2.32    2.58
   8   0  22  178.08   12.55
   7   0  21   -0.61    1.60
   6   0  20    4.46    2.79
  -5   0 -19    0.21    1.49
   5   0  19    0.56    1.80
   4   0  18   93.21    7.58
  -4   0 -18  111.69    7.97
  -3   0 -17    2.15    1.84
   3   0  17   -1.28    1.66
  -2   0 -16 2161.76   88.64
   2   0  16 2093.93   85.73
  -1   0 -15    2.73    1.67
  -1   0 -15    0.03    1.17
   1   0  15    2.02    1.53
   0   0 -14 1907.22   78.46
   0   0 -14 1924.09   79.46
   1   0 -13    1.69    1.26
  -1   0  13   -1.02    0.96
   1   0 -13    0.35    1.09
   2   0 -12   77.12    5.22
  -2   0  12   69.70    4.82
   2   0 -12   72.20    4.99
  -3   0  11   -1.16    0.80
   3   0 -11    1.00    0.82
   3   0 -11    0.29    1.24
  -4   0  10   26.27    2.39
   4   0 -10   25.48    3.03
   5   0  -9   -0.55    0.32
  -5   0   9   -0.28    0.72
   5   0  -9    2.28    1.51
  -6   0   8 5338.42  205.10
   6   0  -8 5303.71  213.17
   7   0  -7    1.49    1.55
   8   0  -6 3091.52  125.17
   9   0  -5   -0.66    1.43
   9   0  -5   -0.11    0.31
  10   0  -4  567.13   23.63
  10   0  -4  619.10   26.57
  11   0  -3   -0.44    0.56
  11   0  -3    0.89    1.50
  12   0  -2  582.70   25.36
  12   0  -2  661.27   28.02
  13   0  -1    0.62    0.94
  13   0  -1   -1.10    1.29
  14   0   0  669.91   30.09
  14   0   0  662.27   28.06
  15   0   1   -0.83    1.30
  15   0   1   -0.99    1.72
  16   0   2  453.49   20.39
  16   0   2  444.92   21.60
  17   0   3    1.99    1.89
  17   0   3    1.38    1.57
  18   0   4  291.75   15.56
  18   0   4  274.14   14.55
  19   0   5   -0.92    1.76
  19   0   5    0.02    1.64
   8   0  23    3.18    2.23
   7   0  22    1.97    2.37
   6   0  21    1.21    2.44
   5   0  20   -2.06    1.89
   4   0  19   -0.11    1.72
  -4   0 -19    0.62    1.70
   3   0  18   -0.37    1.92
  -3   0 -18    1.51    1.92
  -2   0 -17    5.61    2.22
   2   0  17    9.36    2.56
   1   0  16   -1.64    1.59
  -1   0 -16   -1.62    1.67
  -1   0 -16    0.32    1.27
   0   0 -15    7.84    2.15
   0   0 -15    9.66    2.28
   1   0 -14    0.06    1.33
   1   0 -14    1.73    1.59
  -1   0  14   -0.84    1.46
   2   0 -13   -1.08    0.98
  -2   0  13   -1.34    1.00
   2   0 -13   -1.54    0.90
  -3   0  12   -0.80    0.88
   3   0 -12   -0.37    0.93
   3   0 -12    0.93    1.23
  -4   0  11    0.75    0.91
   4   0 -11   -0.15    0.61
   4   0 -11    0.76    1.28
   5   0 -10    0.81    1.29
  -5   0  10    1.24    0.73
   5   0 -10   -0.32    0.33
   6   0  -9   -1.35    1.18
   6   0  -9    0.34    0.45
  -6   0   9   -0.44    0.65
  -7   0   8    0.86    0.52
   7   0  -8   -0.37    1.21
  -7   0   8    0.88    0.52
  -8   0   7   -0.09    0.31
   8   0  -7    1.41    1.45
   9   0  -6    0.87    0.37
   9   0  -6   -0.13    1.41
  10   0  -5   -0.25    1.48
  10   0  -5   -0.14    0.37
  11   0  -4    0.68    1.55
  11   0  -4    0.13    0.48
  12   0  -3   -0.45    0.63
  12   0  -3    0.43    1.71
  13   0  -2    0.01    0.89
  13   0  -2    1.81    1.46
  14   0  -1   10.66    2.73
  15   0   0    4.02    2.14
  15   0   0    6.05    1.88
  16   0   1    6.78    2.10
  16   0   1   10.48    2.47
  17   0   2    1.56    2.07
  17   0   2    1.86    1.42
  18   0   3    3.42    2.49
  18   0   3    2.31    1.78
  19   0   4    0.77    1.72
  20   0   5    0.81    1.91
  21   0   6   -0.51    1.26
   7   0  23    4.51    2.84
   6   0  22  459.51   23.76
   5   0  21    2.73    2.18
   4   0  20    1.11    1.71
  -4   0 -20   -3.09    1.14
   3   0  19    1.44    1.94
  -3   0 -19    0.50    1.82
  -2   0 -18   50.28    5.25
   2   0  18   52.14    5.26
  -1   0 -17    1.75    1.75
   1   0  17   -0.74    1.28
   0   0 -16  522.34   24.04
   0   0 -16  506.26   23.26
  -1   0  15   -1.42    1.38
   1   0 -15    0.21    1.06
   1   0 -15    0.19    1.36
   2   0 -14 1400.03   58.00
   2   0 -14 1388.67   57.43
  -2   0  14 1341.38   55.68
   3   0 -13   -2.16    1.31
   3   0 -13    0.42    0.89
  -3   0  13   -0.09    1.07
   4   0 -12  366.42   19.54
  -4   0  12  471.92   18.97
   4   0 -12  473.43   20.23
  -5   0  11    1.16    0.98
   5   0 -11   -0.17    1.34
   5   0 -11   -0.29    0.34
  -6   0  10   56.15    3.43
   6   0 -10   57.04    4.62
  -7   0   9    1.24    0.56
   7   0  -9   -1.02    1.26
   7   0  -9   -1.29    0.53
   8   0  -8    8.94    2.39
  -8   0   8   10.68    1.02
   9   0  -7    0.28    1.59
  -9   0   7   -0.10    0.25
  -9   0   7    0.51    0.34
  10   0  -6 1095.39   49.35
  10   0  -6 1228.49   45.60
  11   0  -5   -0.68    0.37
  11   0  -5   -1.25    1.38
  12   0  -4  181.99   10.50
  12   0  -4  182.88    8.21
  13   0  -3    0.54    1.24
  13   0  -3    0.16    0.75
  14   0  -2  460.60   19.86
  14   0  -2  472.63   22.41
  15   0  -1    0.43    1.60
  15   0  -1    2.54    1.46
  16   0   0  242.03   13.54
  17   0   1    0.77    1.90
  18   0   2  655.60   30.77
  19   0   3    0.37    1.83
  20   0   4   34.59    5.20
  21   0   5    3.40    2.38
   6   0  23    3.24    2.35
   5   0  22   -1.19    1.75
  -4   0 -21    1.92    1.82
   4   0  21    0.91    1.90
   3   0  20    0.75    1.76
  -3   0 -20    3.39    2.28
   2   0  19   -0.95    1.58
  -2   0 -19    0.67    1.55
  -1   0 -18   -3.51    1.54
   1   0  18   -0.04    1.79
   0   0 -17    3.93    1.91
   0   0  17    0.93    0.67
   0   0 -17    8.79    2.41
   1   0 -16    1.38    1.60
   1   0 -16    0.98    1.40
  -1   0  16   -1.69    1.10
   2   0 -15    1.64    1.64
   2   0 -15    3.52    1.51
  -2   0  15    6.11    1.89
   3   0 -14    3.23    1.32
   3   0 -14    2.85    1.56
  -4   0  13   -0.45    1.00
   4   0 -13   -0.89    0.88
   4   0 -13   -3.05    1.17
  -5   0  12    0.24    0.99
   5   0 -12   -0.37    0.47
   5   0 -12    2.61    1.78
   6   0 -11    1.39    1.62
   6   0 -11   -0.11    0.45
  -6   0  11    0.49    0.92
   7   0 -10    0.72    1.48
  -7   0  10    0.79    0.76
   7   0 -10    0.44    0.79
   8   0  -9    1.71    1.44
  -8   0   9   -0.09    0.43
   9   0  -8    0.58    1.71
  -9   0   8    0.22    0.30
 -10   0   7   -0.08    0.27
  10   0  -7    0.05    1.67
 -10   0   7    0.32    0.33
  11   0  -6   -0.59    1.19
  12   0  -5   -0.59    1.35
  13   0  -4   -0.32    1.40
  14   0  -3    4.63    2.27
  15   0  -2    1.03    1.84
  16   0  -1   13.41    3.24
  17   0   0    5.21    2.81
  18   0   1   21.64    3.99
  19   0   2    8.27    2.67
  20   0   3    0.02    2.04
  21   0   4    0.32    2.06
  22   0   5    0.04    2.43
   5   0  23    2.78    2.53
  -4   0 -22   52.48    6.24
   4   0  22   34.93    5.74
   3   0  21   -1.58    1.54
  -3   0 -21   -0.77    1.57
   2   0  20  274.57   15.19
  -2   0 -20  273.37   15.51
   1   0  19   -0.23    1.67
  -1   0 -19   -0.36    1.47
   1   0 -17    2.25    1.62
  -1   0  17    1.17    1.62
   1   0 -17    0.22    1.35
  -2   0  16  524.82   23.47
   2   0 -16  541.43   24.59
   2   0 -16  510.38   23.94
   3   0 -15    0.78    0.92
  -3   0  15   -0.72    1.30
   3   0 -15   -0.67    1.42
   4   0 -14  174.07    9.64
  -4   0  14  175.84    9.10
   4   0 -14  174.86    9.84
   5   0 -13    0.76    1.50
  -5   0  13   -0.72    0.86
   5   0 -13    0.76    0.71
   6   0 -12  153.97    8.88
  -6   0  12  152.79    7.62
   7   0 -11    0.30    1.53
  -7   0  11    0.29    0.75
   7   0 -11   -0.15    0.75
   8   0 -10 2250.20   92.74
  -8   0  10 2258.45   87.78
   8   0 -10 2263.52   92.10
   9   0  -9    0.00    1.48
  10   0  -8 1107.45   47.57
  11   0  -7    1.02    1.71
  12   0  -6  324.41   16.49
  13   0  -5    0.39    1.62
  14   0  -4  335.83   17.25
  15   0  -3    0.93    1.97
  16   0  -2  753.65   34.46
  17   0  -1    0.19    2.27
  18   0   0 1124.39   49.67
  19   0   1   -0.65    1.99
  20   0   2  330.93   18.22
  21   0   3    1.26    2.61
  22   0   4  409.66   22.04
  23   0   5   -0.74    1.96
   5   0  24    2.16    2.48
   4   0  23    2.90    2.06
   3   0  22    2.39    2.42
  -3   0 -22   -0.57    1.86
   2   0  21    0.29    1.59
  -2   0 -21    0.18    2.07
  -1   0 -20    2.48    1.75
   1   0  20    4.51    2.12
   0   0 -19   17.29    3.55
   1   0 -18    0.37    1.85
  -1   0  18    2.54    1.75
  -2   0  17    3.90    1.77
   2   0 -17    2.75    1.62
   2   0 -17   -0.46    1.33
   3   0 -16    0.41    1.55
   3   0 -16    2.51    1.50
  -3   0  16   -0.82    1.44
  -4   0  15   -0.74    1.02
   4   0 -15    0.10    0.93
   4   0 -15   -1.35    1.33
   5   0 -14    0.09    1.44
  -5   0  14   -0.71    1.05
   5   0 -14    0.56    0.81
  -6   0  13    1.26    1.20
   6   0 -13   -0.53    1.42
   6   0 -13   -0.24    0.54
  -7   0  12    1.19    1.06
   7   0 -12    1.48    0.95
   7   0 -12   -0.19    1.60
   8   0 -11    0.71    1.63
   8   0 -11    0.23    0.97
   9   0 -10   -0.39    1.35
   9   0 -10    0.52    0.89
  10   0  -9   -1.18    1.18
  11   0  -8   -2.47    1.20
  12   0  -7   -1.29    1.52
  13   0  -6    0.81    1.58
  14   0  -5    0.87    1.58
  15   0  -4   10.58    3.19
  16   0  -3   15.28    3.65
  17   0  -2    1.99    2.37
  19   0   0   10.53    3.27
  20   0   1    9.73    3.15
  21   0   2    2.56    2.73
  22   0   3    4.30    2.90
  23   0   4    3.72    2.63
   4   0  24  230.00   14.59
   3   0  23   -1.05    1.55
  -3   0 -23    0.91    1.92
  -2   0 -22   31.90    5.27
   2   0  22   36.02    5.37
  -1   0 -21   -0.27    1.56
   1   0  21    0.96    1.84
   0   0 -20    2.04    1.70
   0   0  20    1.89    1.17
  -1   0  19    0.72    1.57
   1   0 -19   -2.54    1.49
   2   0 -18  989.66   43.83
   2   0 -18  991.40   43.20
  -2   0  18 1014.45   42.31
   3   0 -17    0.59    1.33
  -3   0  17    0.99    1.07
   3   0 -17    0.25    1.27
   4   0 -16  320.46   15.44
  -4   0  16  294.12   14.30
   4   0 -16  277.87   14.85
  -5   0  15    1.31    1.21
   5   0 -15    1.94    1.36
   5   0 -15    1.89    0.95
   6   0 -14   16.68    3.07
   7   0 -13   -0.49    0.64
   7   0 -13   -0.50    1.27
   8   0 -12  142.49    8.01
   8   0 -12  137.56    8.66
   9   0 -11    1.52    1.74
   9   0 -11   -0.49    1.06
  10   0 -10  233.50   12.74
  11   0  -9    1.00    1.86
  12   0  -8  516.18   24.55
  13   0  -7    0.78    1.72
  14   0  -6   48.16    5.40
  15   0  -5    2.94    2.38
  16   0  -4   40.00    5.29
  17   0  -3   -0.53    2.16
  18   0  -2  249.85   14.68
  19   0  -1    3.94    2.46
  20   0   0  122.51    9.38
  21   0   1    1.48    2.65
  22   0   2    6.19    3.20
  23   0   3    0.10    2.25
  24   0   4    3.53    3.08
  -3   0 -24    0.33    1.81
   3   0  24    2.42    2.45
  -2   0 -23    2.60    1.93
   2   0  23    0.51    1.99
   1   0  22    1.34    1.69
  -1   0 -22    1.80    2.14
   0   0 -21    1.00    1.41
   0   0  21   -1.78    0.78
  -1   0  20   -2.51    1.52
   1   0 -20    1.49    1.90
  -2   0  19    5.95    2.01
   2   0 -19    4.46    2.41
   3   0 -18   -0.40    1.44
   3   0 -18    1.33    1.92
  -3   0  18    2.36    1.59
   4   0 -17    0.36    1.27
   4   0 -17    1.92    1.71
   5   0 -16    0.60    1.10
   5   0 -16    3.90    1.89
   6   0 -15   -0.65    1.44
   6   0 -15   -0.35    0.55
   7   0 -14    0.02    1.65
   7   0 -14    0.43    0.68
   8   0 -13   -0.93    1.42
   8   0 -13   -0.15    1.12
   9   0 -12   -0.60    1.05
   9   0 -12    0.32    1.74
  10   0 -11   -1.34    1.69
  10   0 -11    1.05    1.22
  11   0 -10    1.33    1.99
  12   0  -9    1.74    1.91
  13   0  -8    0.13    1.82
  14   0  -7    2.51    2.22
  15   0  -6   -0.61    1.74
  16   0  -5   -0.44    2.17
  17   0  -4   -0.69    1.92
  18   0  -3    4.87    2.67
  19   0  -2    0.88    2.41
  20   0  -1    6.51    3.00
  21   0   0    3.85    2.99
  22   0   1    4.83    3.11
  23   0   2    1.03    2.44
  24   0   3   -1.18    2.18
   2   0  24    1.59    2.04
  -2   0 -24    0.91    1.99
  -1   0 -23   -0.99    1.48
   1   0  23   -0.70    1.58
   0   0 -22   22.90    4.45
   0   0  22   29.99    4.56
   1   0 -21    0.53    1.45
   2   0 -20  396.54   20.08
   3   0 -19   -0.39    1.40
   4   0 -18  146.51    8.98
   4   0 -18  128.89    8.81
   5   0 -17    0.15    0.95
   5   0 -17    0.22    1.67
   6   0 -16   -0.81    0.54
   6   0 -16    0.83    1.69
   7   0 -15    0.69    1.67
   7   0 -15   -0.70    0.55
   8   0 -14  151.80    9.54
   8   0 -14  157.86    8.95
   9   0 -13    1.46    1.95
   9   0 -13   -1.27    0.96
  10   0 -12 1951.74   79.82
  10   0 -12 1912.08   80.74
  11   0 -11    1.64    1.21
  11   0 -11    1.59    2.10
  12   0 -10  626.30   29.22
  13   0  -9   -2.85    1.73
  14   0  -8  142.18    9.79
  15   0  -7   -1.40    1.83
  16   0  -6  442.89   22.39
  17   0  -5   -1.55    2.03
  18   0  -4 1201.36   53.09
  19   0  -3   -1.79    1.94
  20   0  -2   -0.54    1.91
  21   0  -1   -2.44    2.07
  22   0   0  916.68   42.88
  23   0   1    5.31    3.15
  24   0   2   29.85    5.74
  -1   0 -24    0.70    1.85
   0   0 -23    0.10    1.86
   1   0 -22   -1.86    1.82
   2   0 -21    0.61    1.44
   3   0 -20    1.64    1.68
   4   0 -19    2.05    1.81
   5   0 -18    1.73    1.54
   5   0 -18    0.44    1.41
   6   0 -17   -1.28    1.41
   6   0 -17    0.10    0.67
   7   0 -16    0.77    0.79
   7   0 -16    0.60    1.56
   8   0 -15    1.30    1.73
   8   0 -15    0.81    1.15
   9   0 -14   -0.67    0.78
   9   0 -14    1.69    1.89
  10   0 -13   -0.47    0.84
  10   0 -13    0.93    2.04
  11   0 -12    0.27    1.93
  11   0 -12    3.12    1.23
  12   0 -11   -1.59    1.92
  13   0 -10    7.42    3.26
  14   0  -9   -0.02    2.63
  15   0  -8    0.64    2.37
  16   0  -7   -1.24    1.91
  17   0  -6   -0.48    1.86
  18   0  -5    2.91    2.33
  19   0  -4    5.48    2.50
  20   0  -3   -0.12    2.20
  21   0  -2    0.88    2.26
  22   0  -1   10.85    4.09
  23   0   0   13.97    4.05
  24   0   1    2.67    2.87
   0   0 -24    5.45    2.49
   1   0 -23    0.28    1.90
   2   0 -22   27.36    4.65
   3   0 -21    0.90    1.56
   4   0 -20  192.50   11.67
   5   0 -19    0.59    1.69
   5   0 -19    0.29    1.95
   6   0 -18  225.93   12.88
   7   0 -17    0.37    1.65
   7   0 -17    0.29    0.64
   8   0 -16   59.75    4.90
   8   0 -16   55.91    5.53
   9   0 -15    4.43    2.44
  10   0 -14   37.70    3.91
  10   0 -14   50.28    5.19
  11   0 -13    2.13    2.54
  11   0 -13    1.14    1.42
  12   0 -12 1865.40   78.36
  12   0 -12 1921.50   79.99
  13   0 -11    0.09    2.36
  14   0 -10  186.74   12.01
  15   0  -9   -0.51    2.25
  16   0  -8   81.17    7.32
  17   0  -7    3.24    2.63
  18   0  -6   58.12    6.24
  19   0  -5    1.77    2.22
  20   0  -4  218.84   13.98
  21   0  -3    3.88    2.69
  22   0  -2  145.26   10.99
  23   0  -1    3.48    3.13
  24   0   0  134.38   10.72
   1   0 -24   -2.48    1.67
   2   0 -23    4.19    2.43
   3   0 -22   -0.01    2.04
   4   0 -21    0.36    1.58
   5   0 -20    0.68    1.54
   6   0 -19   -0.81    1.02
   6   0 -19   -0.46    2.16
   7   0 -18   -2.03    1.93
   7   0 -18   -1.22    0.74
   8   0 -17   -2.08    1.85
   8   0 -17    1.30    1.45
   9   0 -16   -0.28    1.84
   9   0 -16    0.34    1.02
  10   0 -15    0.47    1.11
  10   0 -15    0.20    2.18
  11   0 -14   -0.66    2.17
  11   0 -14    0.72    1.38
  12   0 -13    1.67    2.65
  12   0 -13   -0.83    1.24
  13   0 -12    1.32    2.67
  14   0 -11    1.66    2.29
  15   0 -10    2.51    2.53
  16   0  -9   -2.02    2.43
  17   0  -8   -1.82    2.07
  18   0  -7   -2.50    1.57
  19   0  -6   -0.74    2.19
  20   0  -5   -1.27    2.65
  21   0  -4    3.88    2.83
  22   0  -3   -0.53    1.92
  23   0  -2    1.37    2.57
  24   0  -1   -0.47    2.14
   2   0 -24   34.44    5.46
   3   0 -23    0.57    2.21
   4   0 -22  134.01    9.50
   5   0 -21    0.04    1.56
   6   0 -20    0.43    1.03
   7   0 -19   -1.40    0.90
   7   0 -19   -0.21    1.99
   8   0 -18   59.32    5.90
   8   0 -18   51.07    4.92
   9   0 -17   -0.94    1.13
   9   0 -17    0.62    2.32
  10   0 -16  108.91    8.32
  10   0 -16  107.39    7.39
  11   0 -15   -0.64    1.88
  11   0 -15   -0.27    1.02
  12   0 -14  632.53   29.84
  12   0 -14  608.48   28.06
  13   0 -13    3.28    2.96
  13   0 -13    8.16    2.16
  14   0 -12   32.51    5.42
  15   0 -11   -0.08    2.33
  16   0 -10 1280.70   56.59
  17   0  -9   -0.66    2.25
  18   0  -8   78.26    7.44
  19   0  -7    1.27    2.40
  20   0  -6  250.11   15.53
  21   0  -5    0.33    2.38
  22   0  -4    2.91    3.09
  23   0  -3    2.01    2.51
  24   0  -2   54.78    7.34
   3   0 -24   -0.58    1.53
   4   0 -23    1.67    2.28
   5   0 -22    1.13    2.11
   6   0 -21   -0.39    1.19
   7   0 -20   -0.37    0.98
   7   0 -20    2.28    2.00
   8   0 -19    1.56    1.97
   8   0 -19   -0.22    1.37
   9   0 -18    1.44    2.00
   9   0 -18    0.79    1.61
  10   0 -17   -0.61    1.36
  10   0 -17   -2.06    1.67
  11   0 -16    0.19    1.45
  11   0 -16    2.52    2.02
  12   0 -15   -1.30    1.07
  12   0 -15    2.43    2.39
  13   0 -14    1.63    2.49
  13   0 -14    2.62    1.44
  14   0 -13   -0.11    1.06
  14   0 -13   -0.47    2.27
  15   0 -12    1.25    2.48
  16   0 -11    4.78    3.02
  17   0 -10    1.76    3.08
  18   0  -9    0.04    2.58
  19   0  -8    1.65    2.86
  20   0  -7   -0.25    2.42
  21   0  -6   -1.21    2.08
  22   0  -5    0.65    2.31
  23   0  -4    4.09    2.67
  24   0  -3    3.39    2.68
   4   0 -24   23.51    4.44
   5   0 -23    0.73    1.86
   7   0 -21   -1.30    0.85
   8   0 -20   38.26    4.90
   8   0 -20   41.62    5.55
   9   0 -19    1.37    1.61
   9   0 -19    2.52    2.40
  10   0 -18  215.18   12.08
  10   0 -18  184.88   12.31
  11   0 -17    1.51    1.71
  11   0 -17   -0.73    2.27
  12   0 -16  272.67   16.22
  12   0 -16  299.27   15.38
  13   0 -15    1.39    1.70
  13   0 -15    2.10    2.53
  14   0 -14  456.32   23.87
  14   0 -14  468.73   22.33
  15   0 -13   -0.12    1.25
  15   0 -13    1.65    2.58
  16   0 -12  310.98   17.89
  17   0 -11   -2.81    2.75
  18   0 -10   58.58    7.49
  19   0  -9    2.12    2.57
  20   0  -8  268.84   16.65
  21   0  -7    0.55    2.82
  22   0  -6   58.68    7.65
  23   0  -5   -0.09    2.14
  24   0  -4   13.46    4.05
   9   0 -20   -2.12    1.94
  10   0 -19   -1.80    2.17
  11   0 -18    1.04    2.41
  12   0 -17   -0.05    1.89
  13   0 -16   -3.79    1.65
  14   0 -15    1.49    2.43
  15   0 -14    0.22    2.61
  16   0 -13   -0.67    2.39
  17   0 -12    0.85    2.80
  18   0 -11    0.26    2.64
  19   0 -10    3.81    3.09
  20   0  -9    2.38    2.67
  21   0  -8   -2.86    2.14
  22   0  -7    1.38    2.89
  23   0  -6   -1.22    2.13
  24   0  -5    0.77    2.27
  10   0 -20   33.26    5.41
  11   0 -19   -0.16    2.47
  12   0 -18  115.52    9.47
  13   0 -17    2.37    2.56
  14   0 -16   52.91    6.98
  15   0 -15    2.51    3.13
  16   0 -14  118.10    9.74
  17   0 -13   -2.48    2.15
  18   0 -12   36.25    6.28
  19   0 -11    1.49    2.72
  20   0 -10   27.01    5.78
  21   0  -9   -1.55    2.52
  22   0  -8  267.00   17.25
  23   0  -7    2.61    2.91
  24   0  -6    2.00    2.19
  10   0 -21    1.87    2.63
  11   0 -20    1.96    3.15
  12   0 -19   -1.75    2.52
  13   0 -18   -3.41    2.20
  14   0 -17    0.45    2.37
  15   0 -16   -0.62    2.13
  16   0 -15    2.35    3.13
  17   0 -14    3.66    2.80
  18   0 -13    3.13    2.78
  19   0 -12    3.88    3.03
  20   0 -11    2.79    3.11
  21   0 -10    2.11    2.66
  22   0  -9    0.73    2.61
  23   0  -8    4.13    2.99
  24   0  -7    3.65    2.81
  11   0 -21    2.91    2.80
  12   0 -20   35.84    6.05
  13   0 -19    0.89    2.74
  14   0 -18   65.83    7.80
  15   0 -17    2.69    2.61
  16   0 -16  139.69   10.95
  17   0 -15   -0.82    2.27
  18   0 -14  128.75   10.65
  19   0 -13    1.56    3.10
  20   0 -12  882.70   42.33
  21   0 -11   -0.82    2.45
  22   0 -10   57.47    7.79
  23   0  -9    4.17    2.71
  12   0 -21    1.35    2.12
  13   0 -20   -0.49    2.29
  14   0 -19    0.89    2.47
  15   0 -18   -0.49    2.23
  16   0 -17    0.09    2.62
  17   0 -16    0.08    2.64
  18   0 -15    1.56    2.81
  19   0 -14    0.55    2.53
  20   0 -13    2.64    2.88
  21   0 -12    1.43    2.72
  22   0 -11    0.61    2.06
  23   0 -10    1.32    2.58
  13   0 -21    5.29    3.46
  14   0 -20   14.56    4.37
  15   0 -19   -2.17    2.29
  16   0 -18   -2.79    1.90
  17   0 -17    1.80    2.76
  18   0 -16  188.87   13.71
  19   0 -15    3.07    2.67
  20   0 -14   33.88    6.39
  21   0 -13    1.15    2.43
  22   0 -12  215.47   15.19
  14   0 -21    6.64    3.49
  15   0 -20    2.16    3.18
  16   0 -19    2.72    2.93
  17   0 -18   -0.04    2.49
  18   0 -17    1.72    2.70
  19   0 -16    1.53    2.31
  20   0 -15   -1.51    2.24
  21   0 -14    5.35    3.49
  20   1 -15   -0.01    2.45
  19   1 -16   44.80    7.03
  18   1 -17    0.35    2.49
  17   1 -18   23.36    5.45
  16   1 -19    2.16    2.78
  15   1 -20    3.93    3.09
  14   1 -21    2.30    2.89
  22   1 -12  205.67   14.69
  21   1 -13    2.85    2.21
  20   1 -14   17.50    4.69
  19   1 -15    1.14    2.40
  18   1 -16    6.63    3.59
  17   1 -17    0.53    2.60
  16   1 -18  224.67   15.19
  15   1 -19    1.33    2.51
  14   1 -20  109.34    9.87
  13   1 -21   -2.23    2.24
  12   1 -22   58.84    7.52
  23   1 -10  265.46   17.35
  22   1 -11    6.75    2.74
  21   1 -12    3.12    2.37
  20   1 -13   -1.42    2.25
  19   1 -14    1.32    3.24
  18   1 -15   -0.33    2.56
  17   1 -16  124.77   10.52
  16   1 -17    1.74    2.72
  15   1 -18   57.06    7.52
  14   1 -19   -3.51    2.18
  13   1 -20    4.77    2.92
  12   1 -21    1.71    2.74
  11   1 -22    0.25    2.46
  10   1 -23    2.76    2.85
  23   1  -9    4.27    2.46
  22   1 -10    2.60    2.72
  21   1 -11   -0.31    2.43
  20   1 -12  121.45   10.29
  19   1 -13    2.85    2.95
  18   1 -14  253.19   16.45
  17   1 -15    1.53    2.77
  16   1 -16   30.66    5.88
  15   1 -17    2.97    3.06
  14   1 -18   11.50    3.84
  13   1 -19    1.37    2.41
  12   1 -20   16.62    4.46
  11   1 -21    0.47    2.33
  10   1 -22  114.03    9.55
  24   1  -7    2.90    2.57
  23   1  -8    1.99    2.42
  22   1  -9   -3.37    2.55
  21   1 -10   25.17    5.60
  20   1 -11    2.61    2.70
  19   1 -12   12.90    4.49
  18   1 -13    2.35    2.45
  17   1 -14   48.07    6.95
  16   1 -15   -1.40    2.04
  15   1 -16    2.08    2.63
  14   1 -17   -1.17    2.38
  13   1 -18    5.72    3.27
  12   1 -19    0.26    2.37
  11   1 -20  135.88   10.51
  10   1 -21   -0.48    2.16
   9   1 -22   45.52    6.22
  24   1  -6   12.04    3.68
  23   1  -7    2.28    2.26
  22   1  -8  150.14   11.49
  21   1  -9    1.63    2.55
  20   1 -10  128.59   10.56
  19   1 -11    1.09    2.27
  18   1 -12  205.06   13.82
  17   1 -13   -0.35    2.19
  16   1 -14   32.80    6.03
  15   1 -15    1.72    2.52
  14   1 -16  140.25   10.74
  13   1 -17    1.92    2.89
  12   1 -18  236.65   14.82
  11   1 -19    0.14    2.27
  10   1 -20   59.99    7.13
   9   1 -21   -1.05    1.85
   8   1 -22   26.08    5.18
  24   1  -5    4.12    2.76
  23   1  -6   81.49    8.14
  22   1  -7    0.51    2.26
  21   1  -8   14.08    4.28
  20   1  -9   -0.61    2.19
  19   1 -10    5.39    3.28
  18   1 -11    2.08    2.69
  17   1 -12  212.21   14.03
  16   1 -13   -0.25    2.68
  15   1 -14  456.46   24.09
  14   1 -15    2.63    2.77
  13   1 -16  217.93   14.00
  12   1 -17    1.42    2.74
  11   1 -18   -1.60    2.48
  10   1 -19   -0.31    2.45
   9   1 -20   21.65    4.69
   8   1 -21    3.53    2.98
   7   1 -22   28.40    5.15
  24   1  -4   17.52    4.14
  24   1  -4   17.29    4.13
  23   1  -5   -3.09    1.81
  22   1  -6    0.52    2.43
  21   1  -7   -0.19    2.55
  20   1  -8   13.53    3.87
  19   1  -9    1.12    2.50
  18   1 -10   86.36    8.10
  17   1 -11    2.99    2.75
  16   1 -12    8.92    3.77
  15   1 -13    0.94    2.72
  14   1 -14  258.15   15.53
  13   1 -15    0.58    2.29
  12   1 -16    2.91    2.67
  11   1 -17   -0.18    1.85
  10   1 -18   33.83    5.18
   9   1 -19   -1.10    2.05
   8   1 -20   95.14    7.89
   7   1 -21    0.02    2.45
  24   1  -3    0.78    2.30
  23   1  -4   41.48    6.51
  22   1  -5    2.82    2.70
  21   1  -6   32.93    5.55
  20   1  -7    0.45    2.44
  19   1  -8    4.59    2.90
  18   1  -9    1.02    2.31
  17   1 -10  431.06   22.85
  16   1 -11   -0.52    2.27
  15   1 -12    4.82    2.84
  14   1 -13    0.90    2.15
  13   1 -14   50.20    6.33
  12   1 -15    0.65    2.42
  11   1 -16   -0.35    2.03
  10   1 -17   -0.05    1.97
   9   1 -18   66.39    6.59
   8   1 -19   -0.29    2.40
   7   1 -20  138.43    9.86
   6   1 -21    1.43    1.96
  24   1  -2    1.52    2.84
  23   1  -3   -3.31    1.91
  22   1  -4    5.88    3.24
  21   1  -5    0.83    2.80
  20   1  -6   82.03    7.82
  19   1  -7    2.12    2.43
  18   1  -8   36.44    5.71
  17   1  -9   -0.51    1.83
  16   1 -10  171.26   11.64
  15   1 -11   -1.50    2.04
  14   1 -12  113.96    8.93
  13   1 -13   -0.52    2.15
  12   1 -14   76.41    6.96
  11   1 -15   -0.69    2.19
  10   1 -16  161.63   10.76
   9   1 -17    0.87    2.13
   8   1 -18  147.90   10.13
   7   1 -19   -0.51    1.67
   6   1 -20   79.63    7.05
   5   1 -21    2.20    2.41
  24   1  -1    0.09    2.37
  23   1  -2  101.76    9.07
  22   1  -3   -1.76    1.81
  21   1  -4  128.67   10.24
  20   1  -5   -2.89    2.35
  19   1  -6    2.94    2.76
  18   1  -7    2.70    2.58
  17   1  -8   76.71    7.03
  16   1  -9   -1.71    1.88
  15   1 -10   82.14    7.37
  14   1 -11    1.10    2.39
  13   1 -12   50.79    6.29
  12   1 -13   -1.61    2.16
  11   1 -14    5.96    3.10
  10   1 -15    0.72    2.39
   9   1 -16   40.42    5.48
   8   1 -17   -0.76    2.17
   7   1 -18   61.12    6.07
   6   1 -19   -0.06    1.77
   5   1 -20  434.09   21.86
   4   1 -21    0.92    2.24
  24   1   0   50.22    6.97
  23   1  -1    4.10    2.63
  22   1  -2   29.01    5.65
  21   1  -3    4.65    2.72
  20   1  -4   -0.41    2.38
  19   1  -5    2.24    2.39
  18   1  -6  246.36   14.81
  17   1  -7    2.84    2.18
  16   1  -8  262.46   15.12
  15   1  -9    1.88    2.23
  14   1 -10   34.20    5.12
  13   1 -11    1.14    2.49
  12   1 -12  754.78   34.88
  11   1 -13   -0.52    2.33
  10   1 -14  683.21   31.84
   9   1 -15   -2.73    1.73
   8   1 -16  284.41   15.53
   7   1 -17   -0.28    2.14
   6   1 -18    2.44    2.50
   5   1 -19    1.36    2.16
   4   1 -20  141.79    9.75
  24   1   1   -2.10    2.31
  23   1   0    3.97    2.21
  22   1  -1   -1.22    1.94
  21   1  -2   24.17    4.99
  20   1  -3    3.10    2.43
  19   1  -4  190.66   12.44
  18   1  -5    0.26    2.15
  17   1  -6   33.05    5.16
  16   1  -7    0.84    2.29
  15   1  -8  282.17   15.73
  14   1  -9    0.65    1.84
  13   1 -10   33.32    5.06
  12   1 -11   -1.18    1.20
  12   1 -11    0.05    2.09
  11   1 -12  466.52   20.89
  11   1 -12  454.20   22.74
  10   1 -13   -1.02    1.77
  10   1 -13   -0.60    1.19
   9   1 -14  178.69   11.06
   9   1 -14  175.37    9.59
   8   1 -15    0.20    1.07
   8   1 -15    0.27    1.96
   7   1 -16  359.55   19.09
   7   1 -16  391.12   18.11
   6   1 -17   -0.66    1.80
   6   1 -17    0.03    1.31
   5   1 -18  154.23   10.27
   5   1 -18  161.07    9.52
   4   1 -19    0.52    1.25
   4   1 -19    2.72    2.31
   3   1 -20    1.31    2.53
   3   1 -20    5.61    2.47
   2   1 -21    1.51    1.57
   1   1 -22    0.29    1.06
  -1  -1  22    1.36    1.20
   0   1 -23    0.96    1.78
   0  -1  23    2.97    2.36
   1  -1  24   83.10    7.65
  23   1   1    1.63    2.19
  22   1   0   68.85    7.01
  21   1  -1   -0.05    2.34
  20   1  -2  356.29   19.42
  19   1  -3    1.57    2.40
  18   1  -4  103.58    8.27
  17   1  -5   -2.27    2.01
  16   1  -6   41.21    5.51
  15   1  -7   -1.95    1.85
  14   1  -8  138.82    9.40
  13   1  -9   -2.23    1.74
  12   1 -10  394.95   19.97
  11   1 -11   -0.54    1.99
  11   1 -11   -1.16    1.13
  10   1 -12  502.66   24.23
  10   1 -12  508.14   22.57
   9   1 -13   -0.24    1.84
   9   1 -13   -0.71    1.11
   8   1 -14  366.17   18.78
   8   1 -14  376.86   17.52
   7   1 -15    0.83    1.84
   7   1 -15    0.71    1.01
   6   1 -16  328.74   17.36
   6   1 -16  345.53   16.53
   5   1 -17   -0.03    1.14
   5   1 -17    1.94    2.18
  -5  -1  17    0.66    1.23
   4   1 -18  556.95   25.15
   4   1 -18  518.64   25.52
  -4  -1  18  541.91   24.49
   3   1 -19   -0.44    1.96
   3   1 -19    1.98    1.68
  -3  -1  19    0.16    1.41
   2   1 -20  148.34    9.67
  -2  -1  20  151.54    9.77
   2   1 -20  154.20   10.20
  -1  -1  21    0.84    0.87
   1   1 -21   -0.32    0.99
   0   1 -22    7.04    2.59
   0  -1  22    8.08    2.90
  -1   1 -23    0.93    1.99
   1  -1  23    2.19    2.31
   2  -1  24   93.06    8.35
  23   1   2   77.82    7.55
  22   1   1    0.92    2.65
  21   1   0    1.31    2.32
  20   1  -1    5.27    2.46
  19   1  -2   74.19    6.86
  18   1  -3    8.31    2.87
  17   1  -4   16.48    4.02
  16   1  -5    2.36    2.50
  15   1  -6  309.44   16.69
  14   1  -7    0.64    1.67
  13   1  -8   66.53    5.91
  12   1  -9    0.73    1.70
  11   1 -10  444.46   21.73
  10   1 -11    1.57    1.71
  10   1 -11   -0.87    0.92
   9   1 -12  106.15    6.38
   9   1 -12  107.87    7.70
   8   1 -13    0.04    1.01
   8   1 -13    0.36    1.54
  -7  -1  14   14.82    2.45
   7   1 -14    9.58    2.88
   7   1 -14   12.91    2.38
   6   1 -15   -0.60    1.20
   6   1 -15   -0.44    0.96
  -6  -1  15   -0.90    1.22
  -5  -1  16   22.92    3.24
   5   1 -16   22.80    3.14
   5   1 -16   22.15    3.71
  -4  -1  17   -0.59    1.25
   4   1 -17    2.83    1.78
   4   1 -17    1.99    1.50
   3   1 -18  563.54   26.37
   3   1 -18  592.78   27.15
  -3  -1  18  568.10   25.88
   2   1 -19   -0.09    1.28
  -2  -1  19    1.35    1.67
   2   1 -19   -1.92    1.65
   1   1 -20    0.13    0.90
  -1  -1  20   -0.41    0.70
   0  -1  21    2.79    2.00
   0   1 -21    1.21    1.72
   1  -1  22    5.01    2.72
  -1   1 -22    4.09    2.50
   2  -1  23    1.95    2.12
   3  -1  24   -0.35    2.00
  22   1   2  175.38   11.97
  21   1   1   -0.88    2.05
  20   1   0   23.17    4.45
  19   1  -1    0.98    1.98
  18   1  -2  456.03   22.94
  17   1  -3   16.19    3.72
  16   1  -4 1303.59   56.43
  15   1  -5   -0.56    1.86
  14   1  -6  202.26   11.99
  13   1  -7    1.55    1.42
  12   1  -8   43.34    5.01
  11   1  -9    0.15    1.67
  10   1 -10  141.75    7.73
  10   1 -10  150.29    9.32
  -9  -1  11   -1.22    0.86
   9   1 -11    0.37    1.00
   9   1 -11   -0.43    1.51
  -8  -1  12  755.10   31.11
   8   1 -12  742.93   33.77
   8   1 -12  766.46   32.38
   7   1 -13    1.58    1.73
  -7  -1  13    1.11    1.13
   7   1 -13   -0.88    1.01
  -6  -1  14  301.29   14.33
   6   1 -14  307.37   14.72
   6   1 -14  307.99   15.83
  -5  -1  15   -0.58    1.23
   5   1 -15   -1.43    1.59
   5   1 -15    0.44    1.01
   4   1 -16   57.75    5.24
   4   1 -16   61.07    4.76
  -4  -1  16   62.71    4.91
  -3  -1  17    1.17    1.51
   3   1 -17    0.84    1.19
   3   1 -17    1.34    1.34
   2   1 -18   88.46    6.88
   2   1 -18   89.71    6.56
  -2  -1  18   85.66    6.51
   1   1 -19   -0.01    1.75
  -1  -1  19   -0.86    0.86
   1   1 -19   -0.02    0.78
   0   1 -20  514.51   26.38
   0  -1  20  601.62   26.54
  -1   1 -21    2.38    1.73
   1  -1  21   -0.59    1.59
   2  -1  22  101.74    8.40
   3  -1  23   -1.75    1.88
   4  -1  24    2.73    2.31
  22   1   3    1.42    1.72
  21   1   2    9.89    3.40
  20   1   1    8.56    3.16
  19   1   0    1.61    2.11
  18   1  -1    7.11    2.81
  17   1  -2  710.16   32.93
  16   1  -3    2.15    2.08
  15   1  -4    5.38    2.46
  14   1  -5    0.29    1.50
  13   1  -6   20.56    3.73
  12   1  -7   -1.17    1.53
  11   1  -8   34.87    4.39
  11   1  -8   23.19    2.12
 -10  -1   9    2.27    0.92
 -10  -1   9   -0.69    0.65
  10   1  -9    0.09    1.65
   9   1 -10  478.72   23.35
   9   1 -10  508.87   21.93
  -9  -1  10  509.88   21.00
   8   1 -11    0.03    1.36
  -8  -1  11    1.25    0.96
   8   1 -11   -0.65    0.78
   7   1 -12   48.72    3.67
   7   1 -12   45.23    4.44
  -7  -1  12   43.71    3.42
  -6  -1  13   -0.46    1.04
   6   1 -13    0.49    1.48
   6   1 -13    0.47    1.02
  -5  -1  14   31.95    3.46
   5   1 -14   36.77    4.33
   5   1 -14   41.05    3.63
   4   1 -15    0.48    1.09
  -4  -1  15   -1.26    1.25
   4   1 -15    0.28    1.59
  -3  -1  16    9.01    2.35
   3   1 -16    8.69    2.69
   3   1 -16   10.77    2.22
   2   1 -17    0.79    1.48
   2   1 -17    1.38    1.46
  -2  -1  17   -0.34    1.06
  -1  -1  18   53.40    4.96
   0   1 -19    1.47    1.62
   0  -1  19    0.46    1.75
   0   1 -19    1.33    1.88
   1  -1  20   70.29    6.46
  -1   1 -20   75.38    6.35
   2  -1  21   -0.02    1.95
   3  -1  22  134.02   10.06
   4  -1  23    0.74    2.30
   5  -1  24   43.94    6.52
  21   1   3    0.10    1.25
  20   1   2  180.83   11.63
  19   1   1    3.02    2.19
  18   1   0  164.37   10.68
  17   1  -1    1.70    2.22
  16   1  -2   53.82    5.47
  15   1  -3    3.77    2.08
  14   1  -4  153.35    9.57
  14   1  -4  146.00    7.60
  13   1  -5    0.62    0.90
  13   1  -5    0.34    1.71
  12   1  -6  789.13   32.23
  12   1  -6  805.86   35.44
  11   1  -7   -0.98    1.02
  11   1  -7    0.21    0.69
  10   1  -8  577.11   24.62
  10   1  -8  639.83   27.67
  -9  -1   9    0.00    0.66
   9   1  -9    0.11    1.37
   9   1  -9   -0.50    0.68
  -9  -1   9   -0.63    0.80
   8   1 -10    1.17    1.56
   8   1 -10    0.51    0.80
  -8  -1  10    2.16    0.97
   7   1 -11   -0.44    1.30
  -7  -1  11    0.32    0.65
   7   1 -11   -1.12    0.63
   6   1 -12    0.45    0.86
   6   1 -12    1.47    1.60
  -6  -1  12    2.27    1.26
  -5  -1  13   -0.36    0.89
   5   1 -13    0.50    0.95
   5   1 -13    0.83    1.34
   4   1 -14  354.55   17.31
   4   1 -14  355.79   16.73
  -4  -1  14  343.24   16.31
   3   1 -15   -0.98    1.01
   3   1 -15   -0.37    1.20
  -3  -1  15    0.51    1.41
   2   1 -16  345.66   16.66
   2   1 -16  342.55   16.16
  -2  -1  16  290.14   15.62
   1   1 -17    0.44    0.83
   1   1 -17    0.05    1.58
  -1  -1  17   -1.31    0.85
   0   1 -18   36.29    4.46
   0  -1  18   38.79    4.89
   1  -1  19    1.29    1.85
  -1   1 -19    0.71    1.83
  -2   1 -20   63.97    5.95
   2  -1  20   65.16    6.23
   3  -1  21    0.58    2.21
   4  -1  22  299.73   17.15
   5  -1  23    3.05    2.21
  20   1   3    0.15    1.07
  19   1   2   25.70    4.43
  18   1   1    2.93    2.57
  17   1   0   49.61    4.29
  17   1   0   47.88    5.11
  16   1  -1    7.42    2.51
  16   1  -1   -0.74    1.27
  15   1  -2   92.44    7.07
  15   1  -2   92.57    5.83
  14   1  -3    1.53    1.80
  14   1  -3   -0.14    0.99
  13   1  -4  343.90   16.94
  13   1  -4  324.44   14.64
  12   1  -5    0.92    1.43
  12   1  -5    0.73    0.85
  11   1  -6  282.38   14.59
  11   1  -6  286.05   12.50
  10   1  -7   -0.78    0.64
  10   1  -7    0.06    1.34
   9   1  -8 1368.12   57.59
   8   1  -9    1.32    1.63
  -8  -1   9   -0.04    0.62
  -8  -1   9   -1.18    0.74
   8   1  -9   -0.45    0.86
  -7  -1  10  166.83    8.07
   7   1 -10  161.18    9.51
   7   1 -10  166.86    8.35
  -6  -1  11   -0.92    0.79
   6   1 -11   -0.74    1.31
   6   1 -11   -0.56    0.50
   5   1 -12  342.93   15.74
  -5  -1  12  342.14   15.39
   5   1 -12  338.29   16.66
   4   1 -13   -0.20    1.40
   4   1 -13   -0.05    0.92
  -4  -1  13   -1.57    0.83
   3   1 -14   13.41    2.51
   3   1 -14   14.24    2.92
  -3  -1  14   11.67    2.56
   2   1 -15    3.97    1.59
  -2  -1  15    0.07    0.64
   2   1 -15    0.05    0.99
   1   1 -16  434.18   22.60
  -1  -1  16  563.90   23.06
   0   1 -17    0.08    0.70
   0   1 -17    4.59    1.92
   0  -1  17    1.67    1.80
   1  -1  18    1.13    1.79
  -1   1 -18   -0.87    1.58
  -1   1 -18   -0.68    1.51
  -2   1 -19    0.16    1.40
   2  -1  19    1.12    1.63
   3  -1  20   21.69    4.27
   4  -1  21   -0.73    2.26
   5  -1  22   13.07    3.92
   6  -1  23   -0.04    1.84
  20   1   4   77.00    6.81
  19   1   3    0.37    1.09
  19   1   3   -0.92    1.62
  18   1   2  109.56    7.32
  18   1   2   97.34    7.71
  17   1   1    0.36    1.14
  17   1   1    0.25    1.58
  16   1   0  239.20   11.94
  16   1   0  222.52   12.83
  15   1  -1    1.19    1.53
  15   1  -1    7.67    2.58
  14   1  -2  293.85   13.86
  14   1  -2  307.01   15.58
  13   1  -3   -0.31    0.66
  13   1  -3   -0.44    1.30
  12   1  -4  803.91   33.41
  12   1  -4  846.60   36.31
  11   1  -5    0.40    1.67
  11   1  -5   -1.18    0.59
  10   1  -6    4.80    2.07
  10   1  -6    7.49    1.41
   9   1  -7    0.16    0.64
   9   1  -7   -0.20    1.38
  -8  -1   8 2252.17   81.82
   8   1  -8 2122.82   90.83
  -8  -1   8 2268.80   86.58
   7   1  -9    1.38    1.56
  -7  -1   9   -0.61    0.68
   7   1  -9   -0.59    0.74
  -6  -1  10 1607.45   64.19
   6   1 -10 1640.62   67.53
   6   1 -10 1628.79   66.42
  -5  -1  11   -0.69    0.65
   5   1 -11    0.19    0.69
   5   1 -11   -0.16    1.44
   4   1 -12  143.50    8.60
  -4  -1  12  149.27    7.90
   4   1 -12  144.29    7.90
  -3  -1  13    0.10    1.12
   3   1 -13    0.65    1.61
   3   1 -13    1.11    1.14
   2   1 -14   71.44    5.54
   2   1 -14   77.23    5.30
   1   1 -15    0.93    0.76
   1   1 -15    0.82    1.35
  -1  -1  15    0.47    1.29
   0  -1  16  943.51   40.56
   0   1 -16  967.05   41.41
  -1   1 -17    1.41    1.43
   1  -1  17    1.48    1.86
  -1   1 -17   -0.28    1.51
   2  -1  18  268.44   14.63
  -2   1 -18  267.25   14.48
   3  -1  19   -1.30    1.56
   4  -1  20    0.90    2.25
   5  -1  21   -0.86    2.11
   6  -1  22  160.74   11.55
   7  -1  23    1.94    1.93
  21   1   6   22.21    4.37
  20   1   5    0.19    1.79
  19   1   4   64.26    6.20
  19   1   4   60.10    5.62
  18   1   3   -0.81    0.94
  18   1   3    1.96    1.58
  17   1   2    0.58    1.49
  17   1   2    2.88    2.25
  16   1   1    4.27    1.88
  16   1   1    2.45    1.43
  15   1   0  647.30   27.50
  15   1   0  629.45   29.10
  14   1  -1    1.51    1.68
  14   1  -1   -1.51    1.11
  13   1  -2    3.16    1.72
  13   1  -2    4.34    1.50
  12   1  -3   -0.08    1.54
  12   1  -3    0.05    0.84
  11   1  -4  252.06   12.97
  11   1  -4  240.23   11.13
  10   1  -5   -0.92    1.27
  10   1  -5   -0.22    0.69
   9   1  -6   41.56    2.80
   9   1  -6   37.84    3.82
   8   1  -7   -0.41    0.55
   8   1  -7    0.57    1.48
   7   1  -8  384.98   17.57
   7   1  -8  396.12   18.93
  -7  -1   8  412.85   17.25
  -7  -1   8  430.54   16.36
  -6  -1   9   -0.34    0.66
   6   1  -9   -1.79    1.01
   6   1  -9   -0.22    0.69
   5   1 -10    1.83    1.71
   5   1 -10    3.27    1.24
  -5  -1  10    1.77    1.15
   4   1 -11   -0.41    1.35
   4   1 -11   -0.31    0.73
  -4  -1  11    0.02    0.81
  -3  -1  12  363.53   17.06
   3   1 -12  406.72   17.63
   3   1 -12  372.25   18.01
   2   1 -13    1.52    1.50
   2   1 -13   -0.39    0.97
  -2  -1  13   -0.16    0.62
   1   1 -14   30.93    3.12
   1   1 -14   35.33    3.79
  -1  -1  14   28.51    3.70
   0  -1  15   -0.63    1.39
   0   1 -15    1.02    1.37
   0   1 -15    0.46    0.49
  -1   1 -16  328.90   16.24
   1  -1  16  307.98   15.85
  -1   1 -16  313.56   15.72
  -2   1 -17   -2.40    1.13
   2  -1  17    1.10    1.89
   3  -1  18   40.92    5.14
   4  -1  19    1.94    2.31
   5  -1  20  158.86   11.01
   6  -1  21   -0.32    1.83
   7  -1  22    7.95    3.24
   8  -1  23    1.10    2.00
  22   1   8   14.31    3.81
  21   1   7   -2.31    2.23
  20   1   6  158.43   10.27
  19   1   5    1.08    2.21
  19   1   5    0.37    1.62
  18   1   4  218.12   12.48
  18   1   4  198.77   11.65
  17   1   3    0.54    1.20
  17   1   3    1.79    0.96
  16   1   2   76.88    6.20
  15   1   1   -1.41    1.12
  15   1   1   -0.60    1.61
  14   1   0   95.62    6.59
  14   1   0   85.71    5.84
  13   1  -1   -0.63    0.98
  13   1  -1    0.23    1.61
  12   1  -2  160.56    8.08
  12   1  -2  154.27    9.19
  11   1  -3   -1.02    1.36
  11   1  -3    0.25    0.90
  10   1  -4  552.54   22.15
  10   1  -4  510.31   24.10
   9   1  -5    0.32    0.63
   9   1  -5    0.26    1.34
   8   1  -6  763.23   33.44
   8   1  -6  782.30   31.10
   7   1  -7   -0.13    1.16
   6   1  -8  153.45    7.49
  -6  -1   8  157.74    7.50
  -6  -1   8  155.59    7.08
   6   1  -8  147.60    8.50
  -5  -1   9   -0.47    0.52
   5   1  -9   -0.48    1.15
   5   1  -9   -0.01    0.68
   4   1 -10  766.30   31.52
   4   1 -10  734.05   32.28
  -4  -1  10  736.77   30.64
   3   1 -11   -1.88    1.08
   3   1 -11    0.07    0.67
  -3  -1  11   -0.30    0.90
   2   1 -12 1017.13   42.53
   2   1 -12 1001.42   43.03
  -1  -1  13    0.78    1.30
   1   1 -13   -1.08    1.13
   1   1 -13   -0.80    0.70
   0   1 -14  258.13   13.45
   0  -1  14  272.56   13.50
   1  -1  15   -1.51    1.41
  -1   1 -15   -1.25    1.09
  -1   1 -15    0.03    0.83
   2  -1  16   29.58    4.19
  -2   1 -16   23.99    3.56
   3  -1  17   -0.86    1.64
   4  -1  18  231.21   13.42
   6  -1  20   85.87    7.62
   7  -1  21    2.98    2.64
   8  -1  22   41.28    6.31
  22   1   9    2.81    2.22
  21   1   8  128.94    9.60
  20   1   7    2.80    2.23
  19   1   6  141.67    9.51
  18   1   5    1.65    2.09
  18   1   5   -0.51    1.67
  17   1   4  175.84   10.36
  17   1   4  183.45   10.84
  16   1   3   -0.46    1.40
  16   1   3   -0.46    1.03
  15   1   2   -0.28    1.17
  15   1   2    0.77    0.72
  14   1   1   -0.79    1.21
  14   1   1   -0.28    1.48
  13   1   0  122.95    7.71
  13   1   0  111.49    6.79
  12   1  -1    9.08    1.83
  11   1  -2  872.50   35.94
  11   1  -2  898.92   38.17
  10   1  -3   -0.24    1.26
  10   1  -3    0.21    0.69
   9   1  -4  110.07    6.86
   9   1  -4  111.54    5.66
   8   1  -5    0.85    1.24
   8   1  -5    0.05    0.60
   7   1  -6  979.63   41.52
   7   1  -6  985.76   39.08
  -6  -1   7    0.15    0.65
   6   1  -7    0.59    1.23
  -6  -1   7   -0.91    0.59
   6   1  -7    0.92    0.70
   5   1  -8  184.64    8.72
  -5  -1   8  185.33    8.68
   5   1  -8  180.91    9.76
   4   1  -9   -0.56    0.73
   4   1  -9   -2.58    1.07
  -4  -1   9   -0.02    0.77
  -3  -1  10  893.61   36.43
   3   1 -10  884.88   38.11
   3   1 -10  901.44   37.45
   2   1 -11    0.27    0.76
   2   1 -11   -0.23    1.12
  -2  -1  11   -0.71    0.33
  -1  -1  12  102.64    6.64
   1   1 -12  113.37    7.02
   1   1 -12  118.00    6.64
   0  -1  13    0.16    1.28
   0   1 -13   -0.14    0.57
   0   1 -13    2.46    1.54
   1  -1  14  207.17   11.29
  -1   1 -14  211.83   11.11
  -2   1 -15    0.35    1.11
   2  -1  15    1.56    1.81
  -2   1 -15    0.23    1.39
   3  -1  16    0.10    1.69
   4  -1  17   -1.50    1.62
   5  -1  18   20.17    4.06
   6  -1  19    2.32    2.45
   7  -1  20    5.17    2.89
   8  -1  21   -0.02    2.08
   9  -1  22  273.97   16.76
  22   1  10   50.09    6.67
  21   1   9    0.46    1.83
  20   1   8  267.88   15.55
  19   1   7   -0.71    1.67
  18   1   6   25.37    4.39
  17   1   5    1.22    1.43
  17   1   5    1.05    1.87
  16   1   4   20.56    3.42
  16   1   4   17.45    3.39
  15   1   3    1.56    1.14
  15   1   3   -0.05    1.03
  13   1   1   -0.33    1.14
  13   1   1    0.59    1.69
  12   1   0 1800.67   75.67
  12   1   0 1867.06   72.88
  11   1  -1   -1.41    1.23
  11   1  -1    1.87    1.03
  10   1  -2    3.26    1.16
  10   1  -2    1.53    1.52
   9   1  -3   -0.08    0.63
   9   1  -3    1.65    1.52
   8   1  -4 1095.94   46.30
   8   1  -4 1113.94   43.80
   7   1  -5    0.00    0.58
   7   1  -5   -0.43    1.11
   6   1  -6  828.92   33.59
   6   1  -6  855.90   35.79
  -5  -1   7   -0.85    0.61
   5   1  -7   -0.01    0.61
   5   1  -7   -0.41    1.13
  -5  -1   7    0.09    0.65
   4   1  -8  883.85   38.06
   4   1  -8  915.92   37.21
  -4  -1   8  899.54   36.17
  -3  -1   9   -0.58    0.69
   3   1  -9   -1.25    0.70
   3   1  -9   -1.62    1.15
   2   1 -10  175.60    9.33
   2   1 -10  172.88    8.80
   1   1 -11   -0.36    1.02
   1   1 -11    1.40    0.91
  -1  -1  11    1.69    1.17
   0  -1  12  493.50   22.23
   0   1 -12  519.07   22.89
   1  -1  13    1.55    1.63
  -1   1 -13    1.02    0.95
  -1   1 -13    1.35    1.35
   2  -1  14  413.18   19.82
  -2   1 -14  441.48   20.09
  -2   1 -14  421.09   19.65
   3  -1  15   -0.11    1.33
   4  -1  16  157.03    9.87
   5  -1  17   -1.82    1.72
   6  -1  18   -0.18    1.82
   7  -1  19   -0.03    2.21
   8  -1  20   87.96    7.93
   9  -1  21    1.97    2.26
  10  -1  22  165.32   12.07
  21   1  10   67.70    7.04
  20   1   9   -0.63    1.80
  19   1   8   23.89    4.55
  18   1   7   -1.05    1.58
  17   1   6  264.96   14.89
  17   1   6  296.08   15.02
  16   1   5    1.43    1.47
  16   1   5    2.12    1.57
  15   1   4  261.49   13.43
  15   1   4  249.45   13.29
  14   1   3    0.22    1.61
  14   1   3    0.76    1.41
  12   1   1    3.35    1.47
  12   1   1    2.49    1.69
  11   1   0    1.99    1.36
  11   1   0    1.72    1.48
  10   1  -1    8.55    1.66
   9   1  -2    0.58    1.36
   9   1  -2    0.84    0.76
   8   1  -3    0.10    0.69
   8   1  -3   -1.43    1.05
   7   1  -4  597.69   26.36
   7   1  -4  623.64   24.83
   6   1  -5   -1.24    0.91
   6   1  -5    0.40    0.66
   5   1  -6 7130.86  287.83
   5   1  -6 7297.31  287.73
  -4  -1   7   -1.19    0.65
   4   1  -7    0.89    1.29
  -4  -1   7   -1.37    0.56
   4   1  -7   -1.26    0.49
   3   1  -8   68.61    3.98
   3   1  -8   69.21    4.72
  -3  -1   8   68.58    4.16
   2   1  -9    0.03    1.06
  -2  -1   9    0.54    0.35
   2   1  -9   -0.28    0.70
   1   1 -10  664.36   28.25
   1   1 -10  637.44   28.61
  -1  -1  10  686.62   27.84
   0  -1  11   -0.50    1.21
   0   1 -11    0.06    0.63
   0   1 -11   -0.75    0.93
   2  -1  13   -1.74    1.06
  -2   1 -13    0.71    1.33
  -2   1 -13   -0.20    0.94
   3  -1  14  562.05   25.31
   4  -1  15    4.48    2.09
   5  -1  16   71.69    6.32
   6  -1  17    0.20    1.96
   7  -1  18  159.63   10.83
   8  -1  19    1.05    2.16
   9  -1  20    2.55    2.31
  10  -1  21    1.68    2.20
  21   1  11   -1.05    1.96
  20   1  10   33.34    5.43
  19   1   9   -0.20    2.10
  18   1   8   87.11    7.24
  17   1   7    0.36    1.74
  16   1   6  198.26   11.16
  16   1   6  195.34   11.31
  15   1   5    0.94    1.28
  15   1   5    0.56    1.34
  14   1   4    1.84    1.50
  14   1   4    2.21    1.68
  13   1   3   -0.67    1.57
  13   1   3   -0.05    1.55
  12   1   2   84.63    5.68
  10   1   0  751.29   31.82
  10   1   0  797.32   33.26
   9   1  -1   -0.12    0.96
   8   1  -2  333.81   15.17
   8   1  -2  319.94   14.03
   7   1  -3   -1.48    1.13
   7   1  -3   -1.21    0.69
   6   1  -4 1106.81   42.90
   6   1  -4 1059.92   45.00
   5   1  -5   -1.67    0.90
   5   1  -5    0.09    0.53
   4   1  -6 1246.26   52.95
  -4  -1   6 1306.90   50.68
  -4  -1   6 1334.27   47.93
   4   1  -6 1253.61   52.02
   3   1  -7   -4.25    1.20
  -3  -1   7   -4.34    0.71
   3   1  -7   -4.59    0.74
   2   1  -8  295.87   12.91
   2   1  -8  274.92   13.41
  -1  -1   9    0.35    0.88
   1   1  -9   -0.53    0.69
   1   1  -9   -0.67    0.98
   0  -1  10  124.16    6.83
   0   1 -10  125.63    6.95
   0   1 -10  104.66    6.32
  -1   1 -11   -0.32    0.44
  -1   1 -11   -0.12    1.13
   1  -1  11    0.97    1.30
  -2   1 -12   78.78    5.35
  -2   1 -12   78.62    5.19
   2  -1  12   80.22    5.77
   3  -1  13    1.07    1.34
   4  -1  14   29.31    4.06
   5  -1  15   15.22    3.35
   7  -1  17   -2.09    1.68
   8  -1  18   78.90    7.18
   9  -1  19   -0.90    1.65
  10  -1  20    0.54    1.90
  11  -1  21    4.20    2.52
  21   1  12   57.26    7.43
  20   1  11    0.91    2.26
  19   1  10   19.27    4.39
  18   1   9   -2.25    1.50
  17   1   8  192.21   11.72
  16   1   7    0.26    1.90
  15   1   6  119.94    8.10
  15   1   6  126.55    7.83
  14   1   5   -1.54    1.22
  14   1   5    0.78    1.61
  13   1   4    9.52    2.37
  13   1   4    9.02    2.30
  12   1   3    0.92    1.51
  12   1   3    0.69    1.49
  11   1   2 2032.01   81.64
  11   1   2 1954.03   79.00
  10   1   1    1.56    1.11
  10   1   1   -0.20    0.49
   9   1   0  976.53   40.31
   9   1   0  943.29   38.79
   8   1  -1   -0.33    1.02
   8   1  -1   -0.16    0.74
   7   1  -2  220.68    9.27
   7   1  -2  184.25    9.92
   6   1  -3   -0.32    0.89
   6   1  -3   -0.03    0.54
   5   1  -4   19.23    1.73
   5   1  -4   19.80    2.31
   4   1  -5    0.27    0.44
   4   1  -5    0.53    0.68
   4   1  -5    0.29    1.11
  -3  -1   6 1051.57   42.48
   3   1  -6 1059.77   44.45
  -3  -1   6 1077.58   40.19
   3   1  -6 1094.15   43.70
   2   1  -7   -0.17    0.56
   2   1  -7   -0.42    0.99
  -2  -1   7   -0.21    0.26
  -1  -1   8  279.64   12.66
   1   1  -8  276.54   12.61
   1   1  -8  286.43   13.26
   0  -1   9    1.77    1.00
   0   1  -9    0.18    1.01
   0   1  -9    0.12    0.80
   1  -1  10  184.46    9.31
  -1   1 -10  167.14    9.03
  -2   1 -11   -0.02    0.94
   2  -1  11   -0.98    1.13
  -2   1 -11   -0.69    0.63
   3  -1  12  316.52   15.35
   4  -1  13   -1.17    1.41
   5  -1  14   11.71    2.89
   6  -1  15    1.27    1.77
   7  -1  16  140.42    9.58
   8  -1  17    0.38    1.92
   9  -1  18   -0.46    2.03
  10  -1  19    1.59    2.29
  11  -1  20  208.16   13.81
  12  -1  21    2.57    1.97
  20   1  12   38.62    5.87
  19   1  11   -0.69    1.74
  18   1  10    8.09    3.23
  17   1   9    3.91    2.14
  16   1   8   62.63    5.95
  15   1   7    0.60    1.33
  15   1   7    2.20    2.02
  14   1   6  156.73    9.47
  14   1   6  158.87    8.95
  13   1   5   -0.51    1.14
  13   1   5    0.40    1.38
  12   1   4  280.30   13.60
  12   1   4  271.86   13.51
  11   1   3    3.30    1.73
  11   1   3    0.27    1.44
  10   1   2  346.94   16.18
  10   1   2  354.71   15.91
   9   1   1   -0.22    0.50
   9   1   1    0.06    0.99
   8   1   0    1.59    0.99
   8   1   0    1.90    1.31
   7   1  -1    0.49    1.13
   7   1  -1   -0.78    0.51
   6   1  -2  120.72    6.84
   6   1  -2  129.51    6.27
   5   1  -3   -0.50    0.65
   5   1  -3   -0.80    0.99
   4   1  -4   12.69    1.47
   4   1  -4   10.07    1.88
  -3  -1   5    0.15    0.49
   3   1  -5   -0.11    0.41
  -3  -1   5   -0.12    0.38
   3   1  -5    0.27    1.07
   2   1  -6   -1.55    1.06
   2   1  -6   -0.78    0.77
   1   1  -7   -1.28    0.58
   1   1  -7   -0.74    1.01
  -1  -1   7   -1.37    0.74
   0   1  -8  751.62   32.35
   0   1  -8  784.22   32.02
   0  -1   8  761.96   31.37
  -1   1  -9   -0.18    0.44
  -1   1  -9   -0.75    0.85
   1  -1   9   -1.71    0.94
   2  -1  10  783.85   32.51
  -2   1 -10  749.09   32.77
  -2   1 -10  794.75   33.06
   3  -1  11    1.85    1.43
   4  -1  12  666.62   29.07
   5  -1  13   -1.07    1.39
   6  -1  14   16.88    3.61
   7  -1  15   -2.40    1.63
   8  -1  16    8.51    3.13
   9  -1  17    1.32    2.19
  10  -1  18  346.58   19.07
  11  -1  19    2.18    2.55
  12  -1  20   72.41    7.43
  20   1  13   -1.87    1.52
  19   1  12   24.51    4.93
  18   1  11   -1.04    1.93
  17   1  10   45.59    5.88
  16   1   9    1.33    1.99
  15   1   8  879.13   38.39
  14   1   7    0.78    1.45
  14   1   7    0.88    1.43
  13   1   6   19.44    2.92
  13   1   6   15.16    3.17
  12   1   5    0.63    1.41
  12   1   5    2.19    1.34
  11   1   4 1860.49   74.78
  11   1   4 1793.05   73.02
  10   1   3    0.52    1.17
  10   1   3    0.41    1.39
   9   1   2  465.31   20.15
   9   1   2  465.41   20.52
   8   1   1   -0.35    0.68
   8   1   1   -1.12    0.77
   7   1   0    0.20    0.80
   7   1   0    0.68    0.82
   6   1  -1   -0.16    0.59
   6   1  -1   -0.48    0.95
   5   1  -2 2563.78  107.21
   5   1  -2 2776.39  103.62
   4   1  -3   -0.47    0.44
   4   1  -3   -0.66    0.81
   3   1  -4 8213.59  335.96
   3   1  -4 8586.44  325.96
   3   1  -4 8337.60  338.08
  -2  -1   5   -1.52    0.29
  -2  -1   5   -1.75    0.31
   2   1  -5   -1.83    0.43
   2   1  -5   -2.24    0.86
  -1  -1   6  184.42    8.33
   1   1  -6  171.58    8.09
   1   1  -6  184.53    8.87
   0   1  -7    0.32    0.77
   0   1  -7    0.02    0.53
   0  -1   7    0.06    0.77
   1  -1   8  570.14   23.90
  -1   1  -8  564.94   24.34
   2  -1   9   -0.93    0.73
  -2   1  -9    0.73    0.73
  -2   1  -9   -0.70    0.72
   3  -1  10  332.01   15.52
   4  -1  11   -0.04    1.30
   5  -1  12 1524.53   62.17
   6  -1  13   -1.57    1.14
   7  -1  14   95.56    7.33
   8  -1  15   -1.69    1.66
   9  -1  16   68.51    6.61
  10  -1  17   -0.75    1.99
  11  -1  18    6.46    3.01
  12  -1  19    3.34    2.35
  13  -1  20  145.80   11.17
  19   1  13    0.04    1.55
  18   1  12  167.26   11.53
  17   1  11   -1.11    1.90
  16   1  10  223.94   13.26
  15   1   9    1.58    2.01
  14   1   8   37.70    4.74
  13   1   7   -0.03    1.24
  13   1   7    0.15    1.35
  12   1   6  467.10   20.37
  12   1   6  426.30   20.44
  11   1   5   -1.18    1.03
  11   1   5    0.29    1.46
  10   1   4 4445.50  173.23
  10   1   4 4446.69  178.11
   9   1   3   -0.82    1.04
   9   1   3   -0.58    0.95
   8   1   2 1190.50   48.65
   8   1   2 1234.98   49.92
   7   1   1   -0.90    1.05
   7   1   1   -0.53    0.95
   5   1  -1   -2.35    0.87
   5   1  -1   -2.40    0.67
   4   1  -2  299.75   12.27
   4   1  -2  282.23   12.85
   3   1  -3   -0.60    0.73
   3   1  -3   -0.25    0.57
   2   1  -4  658.10   25.86
   2   1  -4  604.85   26.51
   1   1  -5   -4.29    0.66
   1   1  -5   -5.43    0.86
  -1  -1   5   -4.00    0.77
   0   1  -6  457.08   20.95
   0  -1   6  524.16   20.43
  -1   1  -7    0.06    0.30
  -1   1  -7   -0.41    0.62
   1  -1   7    0.18    0.86
   2  -1   8   37.32    3.22
  -2   1  -8   36.80    3.02
   3  -1   9   -0.85    1.06
   4  -1  10  317.28   15.10
   5  -1  11    1.99    1.70
   6  -1  12  555.41   25.08
   7  -1  13   -0.68    1.28
   8  -1  14  516.98   24.40
   9  -1  15    0.27    1.99
  10  -1  16    4.25    2.48
  11  -1  17   -2.37    1.85
  12  -1  18   17.44    4.51
  13  -1  19   -0.86    1.80
  19   1  14   45.83    6.64
  18   1  13   -0.61    2.03
  17   1  12   88.85    7.80
  16   1  11    0.24    1.67
  15   1  10    6.35    2.79
  14   1   9   -1.23    1.41
  13   1   8   65.92    5.59
  13   1   8   64.82    4.75
  12   1   7    2.08    1.86
  12   1   7    1.78    1.33
  11   1   6  125.69    7.01
  11   1   6  125.81    7.69
  10   1   5   -0.26    1.19
  10   1   5   -0.25    1.41
   9   1   4   15.10    2.60
   9   1   4   18.41    2.31
   8   1   3   -1.10    1.05
   8   1   3   -0.67    0.94
   7   1   2  550.71   22.77
   7   1   2  515.73   22.39
   6   1   1   -0.67    0.75
   6   1   1    0.34    1.11
   4   1  -1   -6.09    0.98
   4   1  -1   -6.49    0.83
   3   1  -2 2274.26   85.09
   3   1  -2 2107.51   87.94
   2   1  -3    0.31    0.49
   2   1  -3   -0.71    0.65
  -1  -1   4  758.66   30.13
  -1  -1   4  755.18   28.46
   1   1  -4  752.51   31.29
   0  -1   5   -1.37    0.58
   0   1  -5   -1.58    0.75
   0   1  -5   -1.48    0.42
   1  -1   6 1788.60   67.74
  -1   1  -6 1653.46   69.55
   2  -1   7   -0.29    0.95
   3  -1   8   52.90    4.03
   4  -1   9   -0.12    1.04
   5  -1  10 1158.25   47.64
   6  -1  11    0.11    1.34
   7  -1  12   73.17    5.83
   8  -1  13   -0.09    1.72
   9  -1  14  162.00   10.45
  10  -1  15   -0.07    2.47
  11  -1  16   57.82    6.95
  12  -1  17    1.59    2.16
  13  -1  18   75.72    7.60
  14  -1  19    1.67    2.19
  19   1  15    1.41    1.75
  18   1  14   26.51    5.26
  17   1  13    0.45    2.22
  16   1  12  111.42    8.72
  15   1  11   -1.23    1.21
  14   1  10  214.95   12.51
  13   1   9    0.30    1.60
  12   1   8  584.08   25.22
  12   1   8  566.96   25.98
  11   1   7    0.15    0.77
  11   1   7   -0.80    1.02
  10   1   6    0.58    1.54
  10   1   6    0.61    1.09
   9   1   5   -0.52    1.13
   9   1   5   -0.51    0.93
   8   1   4   22.60    2.34
   7   1   3    0.11    1.04
   7   1   3   -1.40    0.85
   6   1   2 6733.62  263.55
   6   1   2 6927.31  271.90
   5   1   1   -3.00    0.75
   5   1   1   -2.57    0.85
   3   1  -1    0.11    0.63
   3   1  -1   -0.68    0.43
   2   1  -2 4109.89  163.81
   2   1  -2 4101.50  158.47
   1   1  -3   -0.53    0.27
   1   1  -3    0.00    0.70
   0  -1   4   13.87    1.63
  -1   1  -5    0.02    0.63
   1  -1   5   -0.09    0.66
   2  -1   6  786.02   31.96
   3  -1   7   -0.92    0.84
   4  -1   8  756.87   31.61
   5  -1   9    0.19    1.15
   6  -1  10    6.45    2.32
   7  -1  11    1.30    1.59
   8  -1  12    0.65    1.82
   9  -1  13    2.27    2.32
  10  -1  14  442.42   21.91
  11  -1  15   -1.16    1.95
  12  -1  16  163.38   11.42
  13  -1  17   -0.07    1.99
  14  -1  18   14.51    4.38
  15  -1  19    1.90    2.28
  18   1  15    2.12    2.12
  17   1  14    1.10    2.18
  16   1  13    1.52    2.18
  15   1  12   73.99    6.74
  14   1  11    0.67    2.04
  13   1  10  382.52   19.16
  12   1   9   -1.87    1.15
  11   1   8  204.99   10.00
  11   1   8  195.35   11.11
  10   1   7    0.74    1.23
  10   1   7   -1.38    1.27
   9   1   6  340.65   16.02
   9   1   6  341.57   15.19
   8   1   5   -0.23    1.27
   8   1   5   -1.82    0.64
   7   1   4   15.63    2.37
   7   1   4   24.40    2.20
   6   1   3   -0.02    0.92
   6   1   3    0.01    0.80
   5   1   2 9492.61  375.10
   5   1   2 9999.00  389.53
   4   1   1   -1.29    0.80
   3   1   0  475.94   18.18
   3   1   0  407.42   18.43
   2   1  -1   -0.74    0.42
   2   1  -1   -0.63    0.48
   1   1  -2 1888.44   78.25
   1   1  -2 2012.51   75.77
   0  -1   3   -1.48    0.64
   0   1  -3   -2.11    0.61
   0  -1   3   -2.70    0.49
  -1   1  -4   69.73    3.98
   1  -1   4   67.98    3.92
   2  -1   5    0.76    0.88
   3  -1   6  790.01   32.28
   4  -1   7    0.79    1.06
   5  -1   8  748.84   31.49
   6  -1   9   -0.56    1.21
   7  -1  10 1938.59   77.90
   8  -1  11    1.43    1.80
   9  -1  12   19.40    3.89
  10  -1  13   -1.87    1.78
  11  -1  14    5.31    2.72
  12  -1  15   -5.03    1.42
  13  -1  16  162.51   11.51
  14  -1  17    2.85    2.59
  15  -1  18  102.95    9.24
  18   1  16  131.49   10.54
  17   1  15   -3.41    1.62
  16   1  14  241.88   14.73
  15   1  13    2.07    2.26
  14   1  12  262.73   14.96
  13   1  11   -0.95    1.93
  12   1  10    1.73    1.80
  11   1   9   -1.02    1.17
  10   1   8  555.93   24.14
  10   1   8  570.50   25.20
   9   1   7    0.71    0.90
   9   1   7   -1.53    1.12
   8   1   6 1662.94   67.29
   8   1   6 1662.65   66.61
   7   1   5    0.26    1.12
   7   1   5    0.37    0.75
   6   1   4  673.72   28.64
   6   1   4  713.74   28.65
   5   1   3    0.07    0.83
   5   1   3    1.65    1.19
   4   1   2 2322.54   92.74
   4   1   2 2441.87   95.33
  -3  -1  -1   -0.68    0.35
   3   1   1   -0.35    0.51
   3   1   1   -0.24    0.63
   2   1   0 3976.65  160.70
   2   1   0 4053.02  154.93
   1   1  -1    0.58    0.42
   1   1  -1    1.66    0.60
   0   1  -2 5086.51  191.32
   0   1  -2 4797.83  198.55
   1  -1   3   -0.78    0.63
   2  -1   4 3456.22  133.89
   3  -1   5    1.08    0.96
   4  -1   6  557.59   23.53
   5  -1   7    0.48    1.13
   6  -1   8  984.37   40.65
   7  -1   9   -1.36    1.29
   8  -1  10  526.18   23.80
   9  -1  11   -1.30    1.58
  10  -1  12   40.97    5.10
  11  -1  13    0.80    2.30
  12  -1  14  106.62    8.41
  13  -1  15   -0.03    2.52
  14  -1  16  309.12   17.75
  15  -1  17   -1.20    1.78
  16  -1  18    3.70    2.27
  17   1  16  168.06   12.17
  16   1  15    1.62    2.32
  15   1  14   64.14    6.68
  14   1  13    0.07    1.84
  13   1  12   12.52    3.63
  12   1  11    2.43    2.11
  11   1  10   96.41    7.14
  10   1   9   -0.49    1.55
  10   1   9   -0.03    1.09
   9   1   8  877.76   36.40
   9   1   8  877.81   37.17
   8   1   7   -1.34    1.07
   8   1   7    0.86    0.78
   7   1   6  755.01   31.56
   7   1   6  749.45   31.02
   6   1   5   -1.05    0.56
   6   1   5   -0.74    1.02
  -5  -1  -4 1171.50   52.46
   5   1   4 1379.90   51.80
   5   1   4 1299.05   51.14
  -4  -1  -3    0.03    0.61
  -3  -1  -2 2089.39   84.18
   3   1   2 1988.70   83.81
   3   1   2 2195.21   81.57
   2   1   1   -4.79    0.71
   2   1   1   -3.81    0.58
  -2  -1  -1   -4.97    0.53
  -1  -1   0  693.61   28.03
   1   1   0  688.46   27.32
   0   1  -1    0.23    0.37
   0   1  -1   -0.03    0.32
   1  -1   2    3.11    1.00
   1  -1   2    2.18    0.94
   2  -1   3   -5.99    0.74
   3  -1   4 2798.96  108.81
   4  -1   5    0.30    0.97
   5  -1   6   14.49    2.35
   6  -1   7    0.42    1.32
   7  -1   8   35.08    3.68
   8  -1   9   -0.18    1.37
   9  -1  10   93.33    6.83
  10  -1  11   -0.56    1.71
  11  -1  12  382.09   19.29
  12  -1  13    0.46    2.36
  13  -1  14   30.27    5.23
  14  -1  15   -0.29    2.54
  15  -1  16   71.27    7.37
  16  -1  17   -0.05    2.15
  17   1  17    1.87    1.86
  16   1  16   -0.46    1.98
  15   1  15   -2.23    1.77
  14   1  14   16.07    4.00
  13   1  13    2.12    2.04
  12   1  12  302.57   16.33
  11   1  11    0.28    1.84
  10   1  10  358.90   17.76
   9   1   9   -2.25    0.83
   9   1   9   -0.09    1.54
   8   1   8   36.46    3.77
   8   1   8   37.13    2.70
   7   1   7   -1.07    1.18
   7   1   7   -2.04    0.59
   6   1   6  469.45   20.46
   6   1   6  468.21   19.54
   5   1   5    1.35    1.14
   5   1   5    0.07    0.50
  -5  -1  -5    0.15    0.82
   4   1   4  311.15   13.06
   4   1   4  319.24   13.78
  -3  -1  -3   -1.25    0.48
   3   1   3   -1.94    0.46
   3   1   3   -1.20    0.74
   2   1   2 1439.03   54.03
  -2  -1  -2 1321.68   55.75
   1   1   1   -0.96    0.47
   1   1   1   -1.08    0.35
  -1  -1  -1   -1.04    0.40
   0   1   0    0.16    0.26
  -1   1  -1   -1.22    0.35
   2  -1   2 1425.89   55.67
   3  -1   3   -0.80    0.82
   4  -1   4  296.69   13.04
   5  -1   5   -0.53    1.06
   6  -1   6  445.47   19.45
   7  -1   7   -1.03    1.32
   8  -1   8   38.49    3.93
   9  -1   9   -0.01    1.36
  10  -1  10  325.55   16.35
  11  -1  11    1.47    2.15
  12  -1  12  299.31   16.19
  13  -1  13    3.81    2.59
  14  -1  14   20.02    4.65
  15  -1  15   -2.61    1.61
  16  -1  16    4.20    2.76
  17  -1  17    1.93    1.94
  16   1  17   -0.67    1.70
  15   1  16   50.99    6.63
  14   1  15   -1.31    1.83
  13   1  14   27.19    4.94
  12   1  13   -0.19    1.82
  11   1  12  383.91   19.41
  10   1  11   -0.88    1.46
   9   1  10   90.30    6.72
   8   1   9   -1.66    0.78
   8   1   9   -0.48    1.38
   7   1   8   33.22    3.86
   7   1   8   34.70    2.50
   6   1   7   -1.16    0.60
  -6  -1  -7    0.52    1.03
   6   1   7   -0.60    1.22
   5   1   6   14.55    1.30
  -5  -1  -6   11.61    2.00
   5   1   6   14.77    2.27
   4   1   5   -0.27    0.75
  -4  -1  -5   -0.54    0.55
   4   1   5    0.26    0.42
  -2  -1  -3   -7.73    0.48
   2   1   3   -5.95    0.79
  -1  -1  -2   -1.93    0.72
   1   1   2   -0.59    0.86
   0  -1  -1    0.26    0.28
   0   1   1    0.25    0.27
   2  -1   1   -3.96    0.59
   2  -1   1   -3.72    0.63
   3  -1   2 1973.08   76.90
   5  -1   4 1273.52   50.63
   6  -1   5   -0.68    1.06
   7  -1   6  735.26   30.81
   8  -1   7   -0.88    1.19
   9  -1   8  815.85   34.69
  10  -1   9    0.97    1.63
  11  -1  10   87.75    6.84
  12  -1  11    0.34    1.24
  12  -1  11   -2.27    2.04
  13  -1  12   17.29    3.98
  13  -1  12   12.13    2.64
  14  -1  13   -1.42    2.36
  15  -1  14   72.10    7.06
  16  -1  15   -0.38    2.43
  17  -1  16  230.77   15.06
  16   1  18    2.33    2.11
  15   1  17    3.28    2.34
  14   1  16  290.05   16.94
  13   1  15    0.92    2.15
  12   1  14  125.82    9.27
  11   1  13    2.49    2.14
  10   1  12   43.33    5.31
   9   1  11   -0.53    1.21
   8   1  10  512.88   23.60
   8   1  10  524.01   22.09
   7   1   9   -1.54    1.13
   7   1   9    0.81    0.79
   6   1   8 1019.61   41.54
   6   1   8  989.89   40.78
   5   1   7   -0.05    0.56
   5   1   7   -1.98    0.81
  -5  -1  -7   -1.75    0.72
  -4  -1  -6  603.53   25.46
   4   1   6  579.87   24.03
   4   1   6  590.32   24.91
  -3  -1  -5   -0.24    0.63
   3   1   5   -0.49    0.88
   3   1   5    0.44    0.45
   1   1   3   -1.68    0.57
  -1  -1  -3   -2.23    0.52
  -1   1   1   -2.68    0.41
   2  -1   0 4079.82  157.29
   2  -1   0 4018.15  148.62
   3  -1   1   -0.24    0.48
   4  -1   2 2134.66   83.08
   5  -1   3    1.94    1.00
   6  -1   4  677.36   28.01
   7  -1   5    0.47    1.15
   8  -1   6 1675.57   67.02
   9  -1   7    0.74    1.51
  10  -1   8  522.99   23.59
  11  -1   9   -1.74    1.41
  12  -1  10    1.26    1.83
  12  -1  10    0.75    1.17
  13  -1  11    0.24    1.46
  13  -1  11   -0.21    2.08
  14  -1  12  303.22   15.43
  14  -1  12  286.78   16.25
  15  -1  13   -1.24    2.09
  16  -1  14  289.69   17.10
  17  -1  15    0.07    2.14
  18  -1  16  157.90   11.77
  15   1  18   96.33    8.73
  14   1  17    0.54    1.92
  13   1  16  180.85   12.20
  12   1  15    0.89    1.99
  11   1  14    3.84    2.63
  10   1  13    0.73    1.82
   9   1  12   19.34    3.86
   8   1  11    1.28    1.55
   7   1  10 1942.97   79.83
   7   1  10 1992.60   80.08
  -7  -1 -10 2031.58   82.38
  -6  -1  -9    0.59    1.00
   6   1   9    0.23    0.60
   6   1   9    1.45    1.45
  -5  -1  -8  379.87   17.57
   4   1   7    0.20    0.89
  -4  -1  -7   -0.30    0.83
  -3  -1  -6  316.49   14.35
   2   1   5    0.20    0.80
  -2  -1  -5    0.71    0.75
   1   1   4   74.40    4.19
  -1  -1  -4   79.05    4.38
   0  -1  -3   -1.79    0.39
   0  -1  -3   -1.90    0.58
  -1   1   2 1766.01   69.57
   1  -1  -2 1824.83   71.88
  -2   1   1   -0.73    0.25
   3  -1   0  456.87   18.39
   4  -1   1   -2.51    0.62
   5  -1   2 8476.77  330.30
   6  -1   3    1.77    1.10
   7  -1   4   16.10    2.34
   8  -1   5    0.81    1.33
   9  -1   6  327.76   15.43
  10  -1   7   -0.76    1.49
  10  -1   7    0.68    1.11
  12  -1   9    0.59    0.67
  12  -1   9   -0.15    1.50
  13  -1  10  406.28   19.19
  13  -1  10  387.36   19.72
  14  -1  11   -0.37    1.18
  14  -1  11   -0.58    1.89
  15  -1  12   81.25    7.21
  16  -1  13    0.07    2.15
  17  -1  14   -0.54    2.02
  18  -1  15   -1.43    1.80
  15   1  19    0.06    1.73
  14   1  18   10.60    3.53
  13   1  17    1.50    2.07
  12   1  16  158.53   11.14
  11   1  15   -0.02    1.50
  10   1  14  483.03   23.57
   9   1  13   -0.01    1.78
   8   1  12    1.52    1.56
   7   1  11   -1.53    1.12
  -7  -1 -11    1.05    1.29
   6   1  10    8.58    2.46
  -6  -1 -10    6.32    2.04
  -5  -1  -9    0.42    1.01
   5   1   9    0.21    1.05
   4   1   8  824.04   32.50
  -4  -1  -8  730.31   33.16
   3   1   7   -1.37    0.76
  -3  -1  -7    0.59    1.00
  -2  -1  -6  606.67   25.95
  -1  -1  -5   -0.41    0.29
  -1  -1  -5    0.42    0.61
   1   1   5   -0.23    0.67
   0   1   4   -2.32    0.34
   1  -1  -3   -0.10    0.48
   1  -1  -3   -0.39    0.44
  -1   1   3    0.32    0.49
  -2   1   2 3882.98  155.05
   2  -1  -2 4113.33  159.41
   3  -1  -1    0.05    0.37
   3  -1  -1    0.00    0.34
   3  -1  -1   -0.85    0.53
   4  -1   0 2078.28   81.35
   4  -1   0 2115.10   84.31
   5  -1   1   -2.53    0.75
   5  -1   1   -2.01    0.75
   6  -1   2 6169.04  237.99
   7  -1   3    0.55    1.05
   8  -1   4    8.29    1.82
   8  -1   4    7.48    1.91
   9  -1   5   -0.45    1.31
   9  -1   5   -0.91    0.93
  10  -1   6    0.44    1.24
  10  -1   6    1.13    1.74
  11  -1   7    0.78    1.35
  11  -1   7   -1.78    1.34
  13  -1   9    2.93    2.13
  13  -1   9    0.31    0.87
  14  -1  10  241.35   13.95
  14  -1  10  254.42   13.42
  15  -1  11   -1.83    1.58
  15  -1  11   -0.76    1.74
  16  -1  12  134.65   10.06
  17  -1  13    0.75    2.65
  18  -1  14   25.15    5.10
  19  -1  15    1.33    2.39
  14   1  19    1.65    2.03
  13   1  18   72.40    7.32
  12   1  17    0.13    2.06
  11   1  16   59.89    7.05
  10   1  15    0.56    1.75
   9   1  14  185.14   11.44
   8   1  13   -0.17    1.50
  -7  -1 -12   71.16    5.75
   7   1  12   77.46    5.93
   6   1  11    0.96    1.31
  -6  -1 -11    3.80    1.34
   5   1  10 1212.75   46.31
  -5  -1 -10 1028.40   47.26
   4   1   9    2.68    1.46
  -4  -1  -9   -0.77    0.79
  -3  -1  -8   53.71    4.04
   3   1   8   53.25    3.95
   2   1   7   -0.74    0.83
  -2  -1  -7   -0.20    0.81
  -1  -1  -6 1716.44   70.81
  -1  -1  -6 1822.38   71.99
   0  -1  -5   -1.72    0.39
   0  -1  -5   -1.03    0.68
   0   1   5   -1.17    0.28
  -1   1   4  713.21   27.23
   1  -1  -4  700.48   28.46
   1  -1  -4  649.68   27.94
   2  -1  -3    0.13    0.56
  -2   1   3   -0.04    0.32
  -3   1   2 2148.02   85.23
   3  -1  -2 2250.68   88.20
   4  -1  -1   -6.34    1.03
   5  -1   0  279.67   12.34
   5  -1   0  273.08   11.55
   6  -1   1    1.07    0.90
   7  -1   2  513.73   21.37
   7  -1   2  513.29   22.18
   8  -1   3   -0.81    1.10
   8  -1   3   -0.89    0.92
   9  -1   4   15.82    2.35
   9  -1   4   14.85    2.47
  10  -1   5   -1.99    1.33
  10  -1   5   -0.24    1.29
  11  -1   6  129.19    7.64
  11  -1   6  125.02    7.80
  12  -1   7   -1.68    1.49
  12  -1   7   -0.89    1.10
  14  -1   9    0.30    0.72
  14  -1   9    1.20    2.12
  15  -1  10    7.40    2.94
  15  -1  10    7.83    2.54
  16  -1  11    0.77    1.97
  16  -1  11   -1.86    1.71
  17  -1  12   86.45    7.93
  18  -1  13    0.73    1.93
  19  -1  14   64.19    7.84
  13   1  19    0.15    1.97
  12   1  18   19.88    4.71
  11   1  17    0.61    1.95
  10   1  16    7.16    2.66
   9   1  15    2.35    1.85
   8   1  14  537.43   25.30
   7   1  13    1.52    1.58
  -7  -1 -13   -0.51    1.11
   6   1  12  574.14   22.81
  -6  -1 -12  403.62   22.27
  -5  -1 -11    1.73    1.37
   5   1  11    4.88    1.98
  -4  -1 -10  238.63   12.17
   3   1   9   -1.92    0.90
  -3  -1  -9   -2.29    0.78
  -2  -1  -8   54.20    2.65
   2   1   8   43.24    3.63
  -1  -1  -7   -0.48    0.87
  -1  -1  -7   -0.17    0.33
   1   1   7    0.83    1.08
   1  -1  -5   -4.71    0.76
   1  -1  -5   -5.82    0.58
  -1   1   5   -4.90    0.67
   2  -1  -4  423.64   19.54
   2  -1  -4  519.10   19.92
  -2   1   4  469.23   18.74
   3  -1  -3   -0.97    0.59
  -3   1   3   -0.35    0.28
   4  -1  -2  291.48   11.84
   4  -1  -2  302.39   13.03
   5  -1  -1   -2.02    0.94
   5  -1  -1   -1.68    0.61
   6  -1   0 1836.13   72.40
   6  -1   0 1883.86   75.34
   7  -1   1   -0.05    0.89
   8  -1   2 1148.00   46.08
   8  -1   2 1161.27   47.83
   9  -1   3   -0.96    0.96
   9  -1   3    0.67    1.26
  10  -1   4 4588.32  182.82
  10  -1   4 4514.82  177.04
  11  -1   5   -0.75    1.47
  11  -1   5   -0.15    1.28
  12  -1   6  455.10   21.02
  12  -1   6  448.68   20.72
  13  -1   7    2.00    1.56
  13  -1   7   -0.37    1.52
  14  -1   8   54.87    5.37
  15  -1   9    0.46    2.09
  15  -1   9    0.60    0.78
  16  -1  10  264.66   14.57
  16  -1  10  263.08   15.11
  17  -1  11    0.22    1.72
  18  -1  12  187.39   12.47
  19  -1  13    2.13    2.27
  13   1  20  155.09   11.60
  12   1  19   -0.87    1.92
  11   1  18    5.98    2.60
  10   1  17    2.72    2.22
   9   1  16   65.58    6.36
   8   1  15    2.10    1.92
  -7  -1 -14  116.89    8.04
   7   1  14  112.46    8.05
  -6  -1 -13    0.57    0.99
   6   1  13    0.93    1.48
  -5  -1 -12 1609.67   67.49
   5   1  12 1605.59   65.51
   4   1  11    0.36    1.34
  -4  -1 -11    0.35    1.02
  -3  -1 -10  344.05   16.85
   3   1  10  374.91   16.75
   2   1   9   -0.69    0.97
  -2  -1  -9    0.98    0.54
  -2  -1  -9   -0.72    0.84
   1   1   8  421.85   20.06
  -1  -1  -8  542.82   19.74
  -1  -1  -8  446.28   20.91
   0  -1  -7   -0.53    0.60
   0  -1  -7   -0.84    0.78
   0   1   7   -0.50    0.44
  -1   1   6  136.94    7.50
   1  -1  -6  185.10    7.61
   1  -1  -6  179.66    8.26
   2  -1  -5   -1.22    0.77
  -2   1   5   -1.23    0.50
   2  -1  -5   -0.57    0.78
   4  -1  -3   -0.93    0.82
   5  -1  -2 2808.57  112.72
   6  -1  -1    0.50    1.04
   7  -1   0    0.35    1.07
   7  -1   0    0.79    0.84
   8  -1   1   -0.62    0.97
   8  -1   1    2.85    1.16
   9  -1   2  441.05   19.18
   9  -1   2  459.38   20.17
  10  -1   3    0.12    1.30
  10  -1   3    1.50    1.48
  11  -1   4 1859.85   76.65
  11  -1   4 1866.21   74.25
  12  -1   5    7.19    1.95
  12  -1   5    2.59    1.69
  13  -1   6   18.24    3.08
  13  -1   6   16.77    3.07
  14  -1   7   -0.23    1.50
  14  -1   7   -1.71    1.20
  15  -1   8  941.78   36.43
  15  -1   8  700.90   35.73
  16  -1   9    0.52    1.05
  16  -1   9    0.84    2.26
  17  -1  10   44.17    5.83
  17  -1  10   47.61    5.44
  18  -1  11    0.51    2.13
  19  -1  12   34.39    5.64
  20  -1  13   -4.02    1.65
  12   1  20   70.64    7.45
  11   1  19    0.34    1.91
  10   1  18  352.52   19.45
   9   1  17   -0.98    1.88
   8   1  16    8.65    3.12
   7   1  15    2.92    2.20
  -7  -1 -15   -0.30    1.31
  -6  -1 -14   15.73    3.36
   6   1  14   18.56    3.65
   5   1  13   -1.52    1.30
  -5  -1 -13    1.02    1.13
  -4  -1 -12  715.07   32.13
   4   1  12  731.62   31.41
  -3  -1 -11   -1.10    0.99
   3   1  11    0.83    1.44
  -2  -1 -10  837.18   33.99
   2   1  10  744.30   32.61
  -2  -1 -10  760.15   31.90
  -1  -1  -9    0.14    0.56
  -1  -1  -9   -0.51    0.80
   1   1   9   -1.60    0.66
   0  -1  -8  758.86   29.48
   0   1   8  633.22   29.16
   0  -1  -8  752.76   30.63
   1  -1  -7   -1.42    0.59
   1  -1  -7   -1.16    0.69
  -1   1   7   -1.36    0.58
  -2   1   6   -3.24    0.47
   2  -1  -6   -1.88    0.87
   2  -1  -6   -1.52    0.77
  -3   1   5    0.74    0.41
   3  -1  -5   -1.07    0.85
   4  -1  -4   13.33    2.00
   5  -1  -3   -1.24    0.97
   6  -1  -2  124.71    6.81
   7  -1  -1    0.36    0.66
   7  -1  -1    0.06    1.01
   8  -1   0    1.70    0.97
   8  -1   0   -0.84    0.91
   9  -1   1    0.01    1.11
   9  -1   1    0.10    1.24
  10  -1   2  345.54   15.08
  10  -1   2  328.77   15.87
  11  -1   3    0.86    1.49
  11  -1   3    1.28    1.63
  12  -1   4  286.34   13.76
  12  -1   4  278.06   14.16
  13  -1   5   -0.12    1.46
  13  -1   5    0.88    1.09
  14  -1   6  157.08    9.52
  14  -1   6  163.40    9.68
  15  -1   7    0.95    1.68
  15  -1   7    0.26    1.35
  16  -1   8   59.39    5.93
  16  -1   8   55.07    5.31
  17  -1   9    0.86    1.11
  17  -1   9   -1.57    1.41
  18  -1  10    8.26    2.97
  18  -1  10    4.06    2.44
  19  -1  11   -0.67    2.27
  20  -1  12   44.49    6.55
  12   1  21    1.91    1.66
  11   1  20  231.00   14.88
  10   1  19    1.68    2.19
   9   1  18    0.02    2.04
   8   1  17    1.33    2.02
   7   1  16  132.40    9.12
  -7  -1 -16  127.81    8.99
   6   1  15   -3.03    1.18
  -6  -1 -15    1.67    1.92
   5   1  14   16.21    3.42
  -5  -1 -14    7.76    2.32
   4   1  13    0.96    1.45
  -4  -1 -13    1.42    1.42
  -3  -1 -12  358.43   17.38
   3   1  12  362.00   17.15
   2   1  11   -0.48    1.30
  -2  -1 -11    0.68    0.68
  -2  -1 -11   -0.17    1.04
  -1  -1 -10  169.97    9.05
  -1  -1 -10  170.64    7.67
   1   1  10  146.66    8.45
   0  -1  -9   -0.54    0.89
   0   1   9    0.69    0.76
   0  -1  -9    0.15    0.74
   1  -1  -8  273.84   11.98
  -1   1   8  271.50   12.16
   1  -1  -8  268.21   12.78
   2  -1  -7    0.21    0.82
   2  -1  -7    0.05    0.69
  -2   1   7   -0.25    0.60
   3  -1  -6  275.73   11.84
  -3   1   6  246.18   10.88
   4  -1  -5    0.42    1.08
  -4   1   5    0.54    0.35
   5  -1  -4   14.07    2.11
   6  -1  -3    1.00    1.10
   7  -1  -2  220.76   10.70
   8  -1  -1   -0.18    0.65
   8  -1  -1   -1.25    0.83
   9  -1   0  933.94   39.46
   9  -1   0  938.66   37.40
  10  -1   1   -0.85    1.10
  10  -1   1    1.08    1.22
  11  -1   2 1970.48   77.59
  11  -1   2 1957.23   80.62
  12  -1   3   -0.63    1.32
  12  -1   3    1.33    1.54
  13  -1   4    7.22    2.09
  13  -1   4   10.61    2.60
  14  -1   5   -0.34    1.15
  14  -1   5    0.16    1.39
  15  -1   6  124.38    8.24
  15  -1   6  125.30    8.30
  16  -1   7   -0.92    1.71
  16  -1   7   -1.41    1.74
  17  -1   8  168.69   11.15
  17  -1   8  208.20   11.77
  18  -1   9    1.14    1.92
  18  -1   9    1.29    1.16
  19  -1  10   16.97    4.30
  20  -1  11   -0.97    1.54
  21  -1  12   61.20    7.55
  11   1  21   -0.76    1.81
  10   1  20    1.59    2.29
   9   1  19   -1.94    2.07
   8   1  18   76.39    7.10
  -7  -1 -17    2.28    1.91
   7   1  17   -0.98    1.48
  -6  -1 -16   50.50    5.22
   6   1  16   46.93    5.68
   5   1  15    6.40    2.24
  -5  -1 -15    7.04    2.24
   4   1  14   31.95    4.44
  -4  -1 -14   29.50    4.03
  -3  -1 -13    0.81    1.23
   3   1  13   -0.33    1.25
  -2  -1 -12   75.70    4.39
   2   1  12   81.71    5.83
  -2  -1 -12   92.67    6.07
  -1  -1 -11   -1.06    0.58
  -1  -1 -11   -1.15    1.01
   1   1  11   -1.44    1.01
   0  -1 -10  119.82    7.05
   0   1  10  112.51    6.61
   0  -1 -10  126.50    6.16
  -1   1   9   -0.30    0.80
   1  -1  -9   -1.46    0.73
   1  -1  -9   -1.04    0.70
   2  -1  -8  274.82   12.90
   2  -1  -8  276.93   12.34
  -3   1   7   -4.22    0.55
   3  -1  -7   -2.97    1.03
   3  -1  -7   -4.21    0.92
   4  -1  -6 1090.06   43.37
  -4   1   6 1015.01   41.01
   5  -1  -5   -1.39    0.99
   6  -1  -4  826.84   34.83
   7  -1  -3   -1.00    1.17
   7  -1  -3   -1.88    0.35
   8  -1  -2  337.56   15.54
   9  -1  -1    1.73    1.48
   9  -1  -1    1.12    0.98
  10  -1   0  773.78   33.62
  10  -1   0  790.87   31.69
  11  -1   1    2.43    1.62
  12  -1   2  170.37    9.50
  12  -1   2  166.20    8.79
  13  -1   3   -0.39    1.13
  13  -1   3    0.07    1.45
  14  -1   4    0.17    1.68
  14  -1   4    2.79    1.73
  15  -1   5    0.54    1.38
  15  -1   5    0.59    1.36
  16  -1   6  197.51   11.48
  16  -1   6  186.36   10.97
  17  -1   7    1.06    1.94
  17  -1   7    0.95    1.88
  18  -1   8   91.96    7.51
  18  -1   8   92.38    7.31
  19  -1   9   -0.50    0.98
  19  -1   9   -1.55    1.90
  20  -1  10   40.00    5.89
  21  -1  11   -0.25    1.69
  10   1  21   -0.30    1.89
   9   1  20    2.40    2.15
   8   1  19    0.06    1.94
   7   1  18  159.70   10.76
  -7  -1 -18  165.56   11.07
   6   1  17    0.18    1.57
  -6  -1 -17   -1.34    1.28
   5   1  16   77.32    6.57
  -5  -1 -16   81.76    6.81
  -4  -1 -15    0.88    1.37
   4   1  15   -0.93    1.39
  -3  -1 -14  612.53   28.56
   3   1  14  643.88   28.12
  -2  -1 -13    0.00    0.94
  -2  -1 -13   -0.55    0.84
   2   1  13   -2.01    1.13
   0  -1 -11   -0.54    1.15
   0   1  11   -0.73    0.84
   0  -1 -11   -0.64    0.74
   1  -1 -10  681.81   30.11
   1  -1 -10  705.00   29.11
   2  -1  -9    1.12    0.97
  -2   1   9    2.24    0.90
   3  -1  -8   68.89    4.24
   3  -1  -8   63.11    3.93
  -3   1   8   55.56    3.46
  -4   1   7    0.09    0.40
   4  -1  -7    0.94    0.95
   4  -1  -7    0.27    1.05
   5  -1  -6 2601.34  113.72
  -5   1   6 3047.03  110.07
   6  -1  -5    0.05    1.14
   7  -1  -4  336.73   15.58
   8  -1  -3    0.07    1.14
   8  -1  -3   -0.81    0.39
   9  -1  -2    2.27    0.80
   9  -1  -2    1.23    1.44
  10  -1  -1   -0.63    0.84
  10  -1  -1    0.60    1.33
  11  -1   0    1.88    1.56
  11  -1   0    2.64    1.23
  13  -1   2  555.07   23.73
  13  -1   2  539.47   24.93
  14  -1   3    0.28    1.52
  14  -1   3    0.47    1.60
  15  -1   4  259.91   13.70
  15  -1   4  249.62   12.91
  16  -1   5    1.37    2.00
  16  -1   5    0.41    1.44
  17  -1   6  266.87   15.16
  17  -1   6  292.53   15.04
  18  -1   7    0.33    1.70
  18  -1   7    1.47    2.01
  19  -1   8   27.11    4.72
  19  -1   8   25.61    4.37
  20  -1   9    2.51    2.76
  20  -1   9    0.13    1.41
  21  -1  10   70.25    6.83
  10   1  22  173.46   12.44
   9   1  21    0.91    2.41
   8   1  20   93.91    8.25
   7   1  19    3.07    2.42
   6   1  18    1.50    1.85
  -6  -1 -18    2.85    1.76
   5   1  17    0.28    1.76
  -5  -1 -17   -0.50    1.43
   4   1  16  190.45   11.29
  -4  -1 -16  180.67   11.19
   3   1  15   -2.02    1.45
  -3  -1 -15    0.12    1.25
  -2  -1 -14  416.84   21.26
   2   1  14  488.04   21.19
  -1  -1 -13    1.25    1.11
  -1  -1 -13    1.87    0.96
   1   1  13   -0.69    0.97
   0  -1 -12  511.19   22.31
   0  -1 -12  530.19   23.80
  -1   1  11   -0.29    0.68
   1  -1 -11   -0.42    0.99
   1  -1 -11   -0.54    0.90
   2  -1 -10  176.80    9.37
   2  -1 -10  178.85    8.78
  -3   1   9   -1.44    0.66
   3  -1  -9    1.78    1.10
   3  -1  -9    4.20    1.32
   4  -1  -8  900.88   36.85
   4  -1  -8  859.17   36.93
  -5   1   7    0.54    0.29
   5  -1  -7   -0.69    0.95
   6  -1  -6  424.02   19.09
   7  -1  -5    0.13    1.21
   8  -1  -4 1156.79   48.36
   9  -1  -3    0.03    0.44
   9  -1  -3   -0.41    1.20
  10  -1  -2    2.98    1.61
  10  -1  -2    1.62    0.88
  11  -1  -1    5.78    1.82
  12  -1   0 1769.25   72.98
  12  -1   0 1755.63   69.51
  13  -1   1    5.86    1.73
  13  -1   1    5.05    1.67
  14  -1   2  426.33   19.09
  14  -1   2  426.44   20.42
  15  -1   3    1.33    1.49
  15  -1   3    3.50    1.71
  16  -1   4   14.25    2.93
  16  -1   4   17.96    3.70
  17  -1   5    0.21    1.86
  17  -1   5    0.45    1.38
  18  -1   6   26.66    4.43
  18  -1   6   20.48    3.94
  19  -1   7    3.64    2.11
  19  -1   7    2.62    2.00
  20  -1   8  289.26   16.65
  20  -1   8  303.42   16.56
   9   1  22  294.07   17.72
   8   1  21    0.05    1.83
   7   1  20    6.89    2.83
   6   1  19    0.84    1.85
  -6  -1 -19    2.55    2.13
  -5  -1 -18   18.40    4.06
   5   1  18   19.97    4.00
  -4  -1 -17    1.17    1.52
   4   1  17    1.19    1.76
  -3  -1 -16    3.87    1.81
   3   1  16    1.80    1.73
   2   1  15   -0.21    1.50
  -2  -1 -15    1.77    1.31
   1   1  14   79.64    5.79
   0   1  13   -0.68    1.09
   0  -1 -13   -1.59    0.69
   0  -1 -13    0.58    1.03
   1  -1 -12  125.59    6.73
   1  -1 -12  119.87    7.43
  -2   1  11    0.29    0.86
   2  -1 -11   -0.87    0.92
   2  -1 -11    0.66    1.08
   3  -1 -10  887.75   37.91
   3  -1 -10  894.48   37.29
   4  -1  -9   -0.77    0.89
   4  -1  -9   -1.34    1.04
  -4   1   9   -1.60    0.57
  -4   1   9   -1.57    0.57
   5  -1  -8  114.08    6.63
   6  -1  -7   -0.26    1.18
   7  -1  -6  397.13   18.27
   8  -1  -5    0.24    1.37
   9  -1  -4  106.34    6.69
  10  -1  -3    0.55    0.53
  10  -1  -3   -2.13    1.25
  11  -1  -2  934.91   36.30
  11  -1  -2  883.78   39.03
  12  -1  -1    5.88    2.06
  12  -1  -1    3.46    1.32
  13  -1   0  114.37    6.40
  13  -1   0  111.83    7.36
  14  -1   1    9.05    2.49
  14  -1   1    8.28    1.95
  15  -1   2    0.95    1.53
  15  -1   2    1.03    1.62
  16  -1   3    2.53    1.50
  16  -1   3    0.83    1.75
  17  -1   4  184.90   10.75
  17  -1   4  193.54   11.56
  18  -1   5    0.68    1.75
  18  -1   5    1.36    1.78
  19  -1   6  148.59    9.92
  19  -1   6  149.75   10.15
  20  -1   7   -2.70    1.69
  21  -1   8  136.13   10.11
   8   1  22   53.49    7.08
   7   1  21   -0.45    1.52
  -6  -1 -20   94.06    8.10
   6   1  20  102.80    8.33
   5   1  19    4.50    2.19
  -5  -1 -19    1.01    1.89
   4   1  18  242.38   13.52
  -4  -1 -18  224.08   13.60
  -3  -1 -17    0.30    1.50
   3   1  17   -1.47    1.66
   2   1  16   28.89    4.35
  -2  -1 -16   34.38    4.47
  -1  -1 -15   -0.10    1.05
   1   1  15   -1.09    0.57
   0   1  14  281.55   13.68
   0  -1 -14  261.00   12.75
   0  -1 -14  278.55   14.29
   1  -1 -13   -0.43    1.12
   1  -1 -13    0.07    1.08
  -1   1  13    0.46    1.15
   2  -1 -12  938.19   41.18
   2  -1 -12  983.29   40.26
   3  -1 -11   -0.12    1.02
   3  -1 -11   -0.31    1.06
  -3   1  11    1.22    0.90
  -4   1  10  668.88   28.78
   4  -1 -10  732.06   30.31
   4  -1 -10  729.62   30.71
   5  -1  -9   -1.07    1.05
   5  -1  -9   -0.63    0.74
  -5   1   9    0.24    0.47
   6  -1  -8  104.61    6.98
  -6   1   8  138.56    5.51
   7  -1  -7   -1.30    1.18
   8  -1  -6  526.27   23.67
   9  -1  -5    0.01    1.59
  10  -1  -4  516.13   21.19
  10  -1  -4  567.14   24.42
  11  -1  -3    0.17    1.61
  11  -1  -3   -0.32    0.62
  12  -1  -2  166.69    7.84
  12  -1  -2  168.15    9.62
  13  -1  -1    0.13    1.10
  13  -1  -1   -1.45    1.09
  14  -1   0   82.34    6.32
  14  -1   0   84.26    5.26
  15  -1   1   12.78    2.84
  15  -1   1    8.48    2.04
  16  -1   2  148.88    9.53
  16  -1   2  139.87    8.36
  17  -1   3    2.77    2.31
  17  -1   3    1.56    1.41
  18  -1   4  198.65   12.10
  19  -1   5   -0.43    1.93
  20  -1   6  156.38   10.75
  21  -1   7    1.27    2.17
   8   1  23    4.82    2.72
   7   1  22    1.35    2.53
   6   1  21    2.60    2.57
  -6  -1 -21    0.69    1.62
  -5  -1 -20  175.11   11.71
   5   1  20  158.11   10.95
   4   1  19    0.11    1.55
  -4  -1 -19    3.61    2.05
   3   1  18   59.01    5.95
  -3  -1 -18   61.55    5.86
   2   1  17    3.08    2.05
  -2  -1 -17    1.69    1.64
   0   1  15    1.49    1.45
   0  -1 -15    3.18    1.50
   1  -1 -14   37.60    4.24
  -1   1  14   23.10    3.17
   1  -1 -14   32.95    3.03
   2  -1 -13    6.25    1.59
   2  -1 -13    6.23    1.60
  -2   1  13    0.79    1.10
   3  -1 -12  371.51   17.75
   3  -1 -12  378.63   17.14
   4  -1 -11   -0.83    0.96
  -4   1  11   -0.56    0.82
   4  -1 -11    0.93    1.17
   5  -1 -10    2.31    1.56
   5  -1 -10    2.51    1.32
  -5   1  10    0.23    0.76
   6  -1  -9   -0.02    0.89
  -6   1   9    0.64    0.40
   6  -1  -9   -0.48    1.03
   7  -1  -8  297.78   14.46
   8  -1  -7    1.71    1.70
   9  -1  -6   37.79    4.25
  10  -1  -5    0.90    1.70
  11  -1  -4  251.99   13.11
  12  -1  -3   -1.46    1.29
  13  -1  -2    3.56    1.86
  14  -1  -1    5.02    2.11
  15  -1   0  637.79   29.21
  16  -1   1    6.59    2.44
  17  -1   2    0.24    1.95
  18  -1   3    1.05    1.95
  19  -1   4   68.38    6.46
  20  -1   5    2.38    2.07
  21  -1   6   22.99    4.64
  22  -1   7    1.77    2.24
   7   1  23    5.13    2.70
   6   1  22  158.70   11.35
  -6  -1 -22  152.90   11.27
   5   1  21   -0.93    1.68
  -5  -1 -21   -0.69    1.61
  -4  -1 -20    4.83    2.80
   4   1  20    5.86    2.20
  -3  -1 -19   -1.61    1.16
   3   1  19    0.81    1.55
  -2  -1 -18  268.02   15.33
   2   1  18  299.64   15.51
  -1  -1 -17   -0.74    1.47
   1   1  17    0.32    0.70
   0  -1 -16  990.11   44.65
   0   1  16 1052.95   43.21
   1  -1 -15    0.61    1.19
  -1   1  15   -0.36    1.48
   2  -1 -14   67.02    5.16
   2  -1 -14   68.32    4.76
  -2   1  14   60.21    4.75
   3  -1 -13    0.92    0.93
  -3   1  13   -0.09    1.02
   3  -1 -13   -0.12    1.30
   4  -1 -12  152.45    8.05
   4  -1 -12  146.14    7.70
  -4   1  12  104.18    6.66
   5  -1 -11    0.01    0.92
   5  -1 -11   -0.33    1.18
  -5   1  11   -1.45    0.64
   6  -1 -10 1606.61   66.48
   6  -1 -10 1609.78   66.41
   7  -1  -9    0.80    0.97
  -7   1   9   -0.16    0.24
   7  -1  -9    0.17    1.46
   8  -1  -8  984.33   42.00
   9  -1  -7   -0.68    1.65
  10  -1  -6    7.13    2.42
  11  -1  -5   -0.59    1.53
  12  -1  -4  865.45   37.93
  13  -1  -3    0.42    1.61
  14  -1  -2  320.64   16.61
  15  -1  -1   23.21    3.85
  16  -1   0  254.53   14.20
  17  -1   1    0.43    1.97
  18  -1   2  103.11    8.00
  19  -1   3    0.01    1.86
  20  -1   4   70.81    6.81
  21  -1   5    1.87    2.71
  22  -1   6  108.47    9.06
  23  -1   7    0.59    2.50
   6   1  23   -0.13    1.65
  -5  -1 -22   10.83    3.72
   5   1  22   17.94    4.31
  -4  -1 -21    0.93    1.92
   4   1  21    1.62    2.04
  -3  -1 -20   21.77    4.49
   3   1  20   22.79    4.21
  -2  -1 -19    0.40    1.66
   2   1  19    1.06    1.80
   1   1  18    0.13    0.76
  -1  -1 -18    1.56    1.69
   0   1  17   -1.02    1.25
   0  -1 -17    2.31    1.72
  -1   1  16  829.19   35.91
   1  -1 -16  853.38   37.58
   2  -1 -15    0.77    1.16
  -2   1  15    1.49    1.67
   2  -1 -15    0.08    1.37
   3  -1 -14   12.34    2.50
   3  -1 -14   11.08    2.56
  -3   1  14    8.97    1.91
   4  -1 -13   -0.81    0.63
  -4   1  13   -1.00    0.98
   4  -1 -13    0.94    1.32
  -5   1  12  284.55   13.76
   5  -1 -12  334.06   15.23
   5  -1 -12  327.21   15.40
   6  -1 -11   -1.15    1.19
   6  -1 -11    0.29    0.98
  -6   1  11    1.45    0.71
   7  -1 -10  163.84    8.96
   7  -1 -10  162.36    9.26
   8  -1  -9    0.29    1.61
   9  -1  -8  709.27   31.40
  10  -1  -7   -1.14    1.56
  11  -1  -6  324.05   16.42
  12  -1  -5    1.36    1.83
  13  -1  -4  397.46   19.60
  14  -1  -3    7.36    2.44
  15  -1  -2   94.70    7.20
  16  -1  -1   12.81    3.47
  17  -1   0   44.40    5.67
  18  -1   1    4.52    2.47
  19  -1   2   22.50    4.48
  20  -1   3    3.09    2.43
  21  -1   4  101.63    8.72
  22  -1   5    0.03    2.20
  23  -1   6   33.98    5.86
  -5  -1 -23   -0.55    1.67
   5   1  23    0.92    1.72
   4   1  22  284.22   16.58
  -4  -1 -22  295.21   17.32
  -3  -1 -21    1.70    2.17
   3   1  21    1.65    1.85
  -2  -1 -20   51.64    6.24
   2   1  20   56.18    5.48
   1   1  19   -0.72    0.85
  -1  -1 -19   -0.79    1.51
   0  -1 -18   36.71    4.96
   0   1  18   41.22    4.94
  -1   1  17    1.34    1.52
   1  -1 -17   -1.55    1.49
   2  -1 -16  343.87   17.79
  -2   1  16  363.05   17.00
  -3   1  15    0.39    1.22
   3  -1 -15   -1.93    1.41
   3  -1 -15   -0.85    1.00
  -4   1  14  359.02   16.24
   4  -1 -14  364.88   16.94
   4  -1 -14  344.24   17.37
   5  -1 -13   -0.58    1.40
   5  -1 -13    0.92    0.94
  -5   1  13   -0.66    0.86
   6  -1 -12    2.29    1.91
   6  -1 -12    0.99    1.12
   7  -1 -11   -0.24    0.97
   7  -1 -11    0.10    1.41
   8  -1 -10    0.97    1.90
   8  -1 -10    0.64    0.97
   9  -1  -9   -0.21    1.75
  10  -1  -8  342.98   17.07
  11  -1  -7   -0.70    1.62
  12  -1  -6  903.46   39.81
  13  -1  -5    2.59    2.20
  14  -1  -4  161.97   10.13
  15  -1  -3    1.73    1.98
  16  -1  -2   56.67    5.60
  17  -1  -1   10.59    3.07
  18  -1   0  140.44    9.75
  19  -1   1    0.51    2.26
  20  -1   2  181.18   12.00
  21  -1   3    0.12    2.31
  22  -1   4   33.64    5.51
  23  -1   5    0.36    2.31
  -5  -1 -24   46.24    6.36
   5   1  24   49.83    6.79
   4   1  23    3.19    1.97
  -4  -1 -23   -0.73    1.62
   3   1  22  155.54   10.70
  -3  -1 -22  146.23   10.85
  -2  -1 -21    1.92    1.92
   2   1  21    1.38    1.59
  -1  -1 -20   64.47    6.25
   0   1  19    1.26    2.05
   0  -1 -19    1.03    1.65
   1  -1 -18  209.06   13.03
  -1   1  18  257.26   13.05
  -2   1  17    1.41    1.09
   2  -1 -17    4.25    1.84
  -3   1  16    9.81    2.36
   3  -1 -16    7.94    2.44
   3  -1 -16    8.78    2.61
   4  -1 -15    1.38    1.17
  -4   1  15    2.60    1.32
   4  -1 -15   -0.03    1.67
   5  -1 -14   38.70    3.89
   5  -1 -14   35.76    3.89
   6  -1 -13    0.13    1.61
   6  -1 -13   -0.45    0.82
   7  -1 -12   44.19    4.39
   7  -1 -12   47.82    4.05
   8  -1 -11   -0.48    0.93
   8  -1 -11    0.41    1.75
   9  -1 -10  449.59   21.33
  10  -1  -9    0.66    1.90
  11  -1  -8   26.82    4.09
  12  -1  -7   -1.75    2.11
  13  -1  -6   25.73    4.35
  14  -1  -5    2.08    2.10
  15  -1  -4   10.73    3.31
  16  -1  -3    0.41    2.31
  17  -1  -2  786.78   36.21
  18  -1  -1    3.62    2.55
  19  -1   0    0.14    2.03
  20  -1   1   -0.78    2.08
  21  -1   2    8.88    3.37
  22  -1   3    2.63    2.43
  23  -1   4    7.70    3.59
  24  -1   5   -0.38    2.15
  -4  -1 -24    6.15    2.55
   4   1  24    1.57    1.88
   3   1  23    3.07    2.26
  -2  -1 -22  105.59    8.60
   2   1  22  108.27    8.47
  -1  -1 -21    1.50    1.93
   1   1  21   -1.01    0.86
   0   1  20  630.67   27.80
   0  -1 -20  566.79   28.45
   1  -1 -19    3.28    2.03
  -1   1  19    2.01    1.78
   2  -1 -18   82.19    6.98
  -2   1  18   91.42    6.57
   3  -1 -17   -0.40    1.45
   4  -1 -16   61.74    4.98
   4  -1 -16   54.79    5.02
   5  -1 -15    0.96    1.82
   5  -1 -15   -0.51    0.93
   6  -1 -14  331.88   16.34
   6  -1 -14  318.41   16.02
   7  -1 -13   -0.04    1.50
   7  -1 -13   -0.70    0.94
   8  -1 -12  738.10   32.25
   8  -1 -12  726.47   32.49
   9  -1 -11    0.84    0.99
   9  -1 -11   -0.09    1.57
  10  -1 -10  128.13    8.48
  11  -1  -9    1.07    1.86
  12  -1  -8   46.71    5.05
  13  -1  -7    0.58    1.96
  14  -1  -6  229.31   13.34
  15  -1  -5   -0.18    2.34
  16  -1  -4 1434.24   61.81
  17  -1  -3   19.27    4.03
  18  -1  -2  509.95   25.38
  19  -1  -1   -0.19    1.94
  20  -1   0   18.91    4.58
  21  -1   1   -1.62    2.07
  22  -1   2  198.40   13.35
  23  -1   3    4.04    3.10
  24  -1   4  141.18   11.13
  -3  -1 -24    0.61    1.78
   3   1  24    0.81    2.06
  -2  -1 -23    1.61    2.07
  -1  -1 -22    4.02    2.58
   0  -1 -21    2.05    2.10
   1  -1 -20   79.86    6.83
   2  -1 -19    0.79    1.83
   3  -1 -18  548.53   26.28
   4  -1 -17    0.84    1.47
   5  -1 -16   20.53    3.60
   5  -1 -16   23.23    3.60
   6  -1 -15    1.14    1.73
   6  -1 -15    0.80    0.90
   7  -1 -14    9.27    2.47
   7  -1 -14   12.49    2.76
   8  -1 -13   -1.32    1.10
   8  -1 -13    1.00    1.38
   9  -1 -12  106.53    7.48
   9  -1 -12  108.78    7.10
  10  -1 -11   -0.86    0.78
  10  -1 -11   -0.18    2.10
  11  -1 -10  425.88   20.91
  12  -1  -9    0.87    2.00
  13  -1  -8   58.74    5.80
  14  -1  -7   -1.49    2.13
  15  -1  -6  341.85   18.29
  16  -1  -5    8.28    3.00
  17  -1  -4   19.20    4.23
  18  -1  -3    9.19    3.21
  19  -1  -2   93.23    7.93
  20  -1  -1    2.91    2.71
  21  -1   0   -1.51    2.14
  22  -1   1    1.53    2.55
  23  -1   2   80.29    7.99
  24  -1   3   -2.72    2.09
  -2  -1 -24   96.16    8.55
  -1  -1 -23    1.61    2.08
   0  -1 -22    6.34    2.94
   1  -1 -21    0.44    1.72
   2  -1 -20  131.61    9.33
   3  -1 -19   -2.40    1.36
   4  -1 -18  524.08   25.31
   5  -1 -17    1.72    1.48
   5  -1 -17    0.62    1.62
   6  -1 -16  367.96   17.42
   6  -1 -16  327.46   17.47
   7  -1 -15    0.34    1.27
   7  -1 -15   -2.19    1.21
   8  -1 -14  366.09   18.52
   8  -1 -14  398.83   19.05
   9  -1 -13    0.60    1.98
   9  -1 -13   -0.24    1.20
  10  -1 -12  536.15   25.42
  10  -1 -12  540.32   24.78
  11  -1 -11   -1.89    1.94
  12  -1 -10  426.47   21.24
  13  -1  -9    1.69    2.33
  14  -1  -8  171.98   11.12
  15  -1  -7    0.62    2.53
  16  -1  -6   61.44    7.05
  17  -1  -5   -0.67    2.13
  18  -1  -4   99.33    8.37
  19  -1  -3   -1.39    2.03
  20  -1  -2  334.85   18.88
  21  -1  -1    0.50    2.62
  22  -1   0   74.60    7.46
  23  -1   1   -0.26    2.68
  24  -1   2    8.48    3.70
  -1  -1 -24   77.74    7.44
   0  -1 -23   -0.78    1.98
   1  -1 -22    1.94    2.43
   2  -1 -21    4.26    2.32
   3  -1 -20    3.49    2.16
   4  -1 -19    1.25    1.78
   5  -1 -18  136.78    9.12
   6  -1 -17    3.66    2.13
   6  -1 -17    0.34    1.47
   7  -1 -16  395.03   19.81
   7  -1 -16  405.35   19.75
   8  -1 -15   -0.49    1.49
   8  -1 -15    1.54    1.82
   9  -1 -14  191.33   11.29
   9  -1 -14  190.34   10.87
  10  -1 -13    0.22    1.62
  10  -1 -13    1.40    1.33
  11  -1 -12  472.68   22.60
  11  -1 -12  502.00   23.77
  12  -1 -11   -0.91    2.24
  13  -1 -10   31.30    5.00
  14  -1  -9    1.61    2.81
  15  -1  -8  304.66   16.96
  16  -1  -7    1.52    2.37
  17  -1  -6   47.33    6.35
  18  -1  -5   -1.53    2.17
  19  -1  -4  207.51   13.45
  20  -1  -3   -1.03    2.70
  21  -1  -2   22.06    5.13
  22  -1  -1    0.32    2.17
  23  -1   0   -0.40    2.49
  24  -1   1    0.29    2.43
   0  -1 -24   55.25    6.86
   1  -1 -23   -0.31    1.89
   2  -1 -22   46.98    6.03
   3  -1 -21    0.48    1.56
   4  -1 -20  130.64    9.28
   5  -1 -19   -0.05    1.52
   6  -1 -18    6.04    2.45
   7  -1 -17   -0.66    1.47
   7  -1 -17   -0.72    1.54
   8  -1 -16  320.69   16.60
   8  -1 -16  315.57   16.43
   9  -1 -15   -0.94    1.36
   9  -1 -15   -0.33    1.48
  10  -1 -14  682.69   31.03
  10  -1 -14  658.01   30.37
  11  -1 -13    0.04    1.40
  11  -1 -13    0.73    2.29
  12  -1 -12  810.35   36.98
  13  -1 -11   -2.24    2.53
  14  -1 -10   30.93    5.23
  15  -1  -9   -0.54    2.52
  16  -1  -8  283.21   16.22
  17  -1  -7    0.39    2.56
  18  -1  -6  284.06   16.54
  19  -1  -5   -1.94    2.17
  20  -1  -4    1.15    2.86
  21  -1  -3   -1.51    2.29
  22  -1  -2   23.61    5.36
  23  -1  -1   -0.83    2.52
  24  -1   0   71.47    8.63
   1  -1 -24   11.31    3.63
   2  -1 -23    1.40    2.01
   3  -1 -22  166.77   11.35
   4  -1 -21    0.89    1.94
   5  -1 -20  453.71   22.94
   6  -1 -19    0.55    1.32
   7  -1 -18   56.17    5.48
   8  -1 -17    1.08    1.70
   8  -1 -17   -1.00    1.51
   9  -1 -16   34.51    4.64
   9  -1 -16   41.67    5.14
  10  -1 -15   -1.26    1.06
  10  -1 -15    0.63    2.26
  11  -1 -14    8.44    3.17
  11  -1 -14    4.88    2.05
  12  -1 -13   -1.16    2.19
  12  -1 -13   -0.17    1.19
  13  -1 -12   47.16    6.11
  14  -1 -11   -1.46    2.63
  15  -1 -10   92.92    8.02
  16  -1  -9    0.04    2.47
  17  -1  -8   76.40    7.41
  18  -1  -7    2.81    2.95
  19  -1  -6    3.12    3.01
  20  -1  -5   -1.85    2.16
  21  -1  -4  137.52   10.82
  22  -1  -3   -1.81    2.77
  23  -1  -2  119.10   10.12
  24  -1  -1    1.96    2.56
   2  -1 -24    0.20    1.96
   3  -1 -23    1.46    2.17
   4  -1 -22   63.19    6.43
   5  -1 -21   -1.43    1.79
   6  -1 -20   75.72    6.66
   7  -1 -19    2.82    2.10
   8  -1 -18  156.57   10.38
   8  -1 -18  165.37   10.48
   9  -1 -17   -0.92    1.54
   9  -1 -17    0.84    2.22
  10  -1 -16  158.42   10.15
  10  -1 -16  162.97   10.75
  11  -1 -15   -2.54    2.28
  11  -1 -15   -1.19    1.50
  12  -1 -14   82.26    7.29
  12  -1 -14   72.38    6.14
  13  -1 -13    0.10    1.29
  13  -1 -13    1.04    2.24
  14  -1 -12  113.69    9.01
  15  -1 -11    1.12    2.41
  16  -1 -10  189.66   12.57
  17  -1  -9   -3.30    1.94
  18  -1  -8   37.89    6.07
  19  -1  -7   -1.10    2.59
  20  -1  -6   76.83    7.77
  21  -1  -5   -1.24    2.24
  22  -1  -4   12.51    4.01
  23  -1  -3    3.79    2.90
  24  -1  -2   -2.22    2.19
   3  -1 -24   13.18    3.78
   4  -1 -23    0.23    2.02
   5  -1 -22   79.32    7.43
   6  -1 -21    2.24    1.96
   7  -1 -20  144.21    9.85
   8  -1 -19    1.77    1.95
   9  -1 -18   75.77    7.12
   9  -1 -18   83.89    6.87
  10  -1 -17    1.67    2.48
  10  -1 -17   -1.04    1.21
  11  -1 -16    1.54    1.61
  11  -1 -16    2.67    2.63
  12  -1 -15   -0.16    1.42
  12  -1 -15   -0.12    2.18
  13  -1 -14   51.77    6.25
  13  -1 -14   43.18    4.73
  14  -1 -13   -2.17    1.80
  14  -1 -13    1.58    1.40
  15  -1 -12    7.79    3.63
  16  -1 -11    1.65    3.02
  17  -1 -10  510.14   26.11
  18  -1  -9    3.14    3.06
  19  -1  -8    5.34    3.40
  20  -1  -7    0.57    2.62
  21  -1  -6   35.43    6.10
  22  -1  -5    1.58    2.64
  23  -1  -4   54.50    7.41
  24  -1  -3   -0.97    1.77
   4  -1 -24   15.04    4.04
   5  -1 -23    3.68    2.27
   6  -1 -22    5.19    2.91
   7  -1 -21   -0.16    2.13
   8  -1 -20  101.82    8.08
   9  -1 -19    1.61    1.66
  10  -1 -18   28.09    4.43
  10  -1 -18   29.25    4.75
  11  -1 -17    3.78    2.50
  11  -1 -17    1.26    1.73
  12  -1 -16    5.35    2.88
  12  -1 -16    3.38    1.66
  13  -1 -15   -0.90    2.02
  13  -1 -15   -0.47    1.51
  14  -1 -14  263.91   15.76
  14  -1 -14  269.70   14.62
  15  -1 -13    1.42    2.39
  16  -1 -12    6.03    3.37
  17  -1 -11   -2.06    2.52
  18  -1 -10   95.46    8.74
  19  -1  -9   -0.07    2.88
  20  -1  -8   15.08    4.32
  21  -1  -7   -0.50    2.55
  22  -1  -6    1.61    2.40
  23  -1  -5   -0.58    2.69
  24  -1  -4   16.97    4.44
   5  -1 -24   71.10    7.03
   6  -1 -23   -1.15    1.86
   7  -1 -22   26.10    4.87
   8  -1 -21   -0.64    1.60
   9  -1 -20   22.24    4.65
  10  -1 -19    3.45    2.73
  10  -1 -19    0.36    1.59
  11  -1 -18   -0.58    2.21
  11  -1 -18   -0.80    1.69
  12  -1 -17    1.17    2.19
  12  -1 -17   -1.01    1.43
  13  -1 -16  213.29   12.66
  13  -1 -16  215.97   13.77
  14  -1 -15    1.89    1.81
  14  -1 -15    2.19    2.57
  15  -1 -14  464.40   23.71
  15  -1 -14  436.63   21.96
  16  -1 -13    0.83    2.89
  17  -1 -12  220.10   14.66
  18  -1 -11    2.37    3.11
  19  -1 -10    5.96    3.64
  20  -1  -9    0.76    2.88
  21  -1  -8   16.37    4.80
  22  -1  -7   -0.62    2.28
  23  -1  -6   90.30    8.72
  24  -1  -5    1.21    2.05
   6  -1 -24  169.32   11.96
   7  -1 -23    0.84    2.18
   8  -1 -22   22.09    4.50
   9  -1 -21    2.50    2.20
  10  -1 -20   56.89    6.59
  11  -1 -19    2.68    1.90
  11  -1 -19    0.16    2.30
  12  -1 -18  263.27   15.23
  12  -1 -18  275.33   16.00
  13  -1 -17   -1.06    2.39
  13  -1 -17    2.34    1.86
  14  -1 -16  115.29    9.51
  14  -1 -16  123.58    8.62
  15  -1 -15   -0.67    2.46
  15  -1 -15   -0.47    1.41
  16  -1 -14   32.39    4.35
  16  -1 -14   46.95    6.64
  17  -1 -13    0.79    2.57
  18  -1 -12  200.23   13.84
  19  -1 -11   -3.34    2.06
  20  -1 -10  141.24   11.24
  21  -1  -9    4.81    3.43
  22  -1  -8  160.03   12.26
  23  -1  -7   -0.89    1.80
  24  -1  -6   16.20    4.46
   8  -1 -23    0.25    2.10
   9  -1 -22   50.40    6.22
  10  -1 -21   -0.46    2.09
  11  -1 -20  142.56   10.24
  12  -1 -19   -2.32    2.81
  12  -1 -19   -0.31    1.81
  13  -1 -18    7.25    2.74
  13  -1 -18    0.54    2.45
  14  -1 -17    0.70    2.72
  14  -1 -17    0.56    1.78
  15  -1 -16    2.95    1.81
  15  -1 -16    1.89    2.90
  16  -1 -15    0.87    2.89
  16  -1 -15    2.25    1.79
  17  -1 -14   52.21    7.21
  18  -1 -13    1.13    2.80
  19  -1 -12   13.63    4.59
  20  -1 -11    1.21    3.18
  21  -1 -10   13.97    4.38
  22  -1  -9   -1.15    2.64
  23  -1  -8    1.76    2.06
  24  -1  -7    1.85    2.62
   9  -1 -23    0.23    2.00
  10  -1 -22  116.30    9.13
  11  -1 -21    0.59    1.85
  12  -1 -20   18.44    4.22
  13  -1 -19    0.77    2.58
  13  -1 -19    0.36    2.08
  14  -1 -18   10.75    3.35
  14  -1 -18   11.13    4.05
  15  -1 -17   -1.88    1.70
  15  -1 -17    4.16    3.21
  16  -1 -16   33.86    5.05
  16  -1 -16   40.75    6.34
  17  -1 -15   -0.55    1.80
  17  -1 -15    0.54    2.16
  18  -1 -14  256.42   16.35
  19  -1 -13    4.70    3.33
  20  -1 -12  128.91   10.87
  21  -1 -11    1.97    2.85
  22  -1 -10   -0.21    2.51
  23  -1  -9    2.97    2.78
  12  -1 -21    0.08    1.88
  13  -1 -20    8.76    3.82
  13  -1 -20    6.78    3.27
  14  -1 -19   -0.33    1.80
  14  -1 -19    0.78    2.31
  15  -1 -18   36.83    5.52
  15  -1 -18   61.06    7.33
  16  -1 -17   -1.87    1.44
  16  -1 -17    1.74    2.94
  17  -1 -16  117.26    9.80
  17  -1 -16   77.19    7.03
  18  -1 -15    0.73    1.66
  18  -1 -15   -1.68    2.58
  19  -1 -14    5.93    3.62
  20  -1 -13   -1.30    2.53
  21  -1 -12    8.13    3.81
  22  -1 -11    3.46    3.06
  23  -1 -10  244.92   16.72
  14  -1 -20  107.69    9.66
  15  -1 -19    4.54    2.85
  16  -1 -18  215.02   14.71
  17  -1 -17    5.10    3.24
  18  -1 -16   16.79    4.68
  19  -1 -15   -0.02    2.83
  20  -1 -14   26.57    5.79
  21  -1 -13    3.65    3.15
  22  -1 -12  203.15   14.80
  15  -1 -20    5.51    2.99
  16  -1 -19    0.94    2.30
  17  -1 -18   23.19    5.58
  18  -1 -17    4.41    2.89
  19  -1 -16   39.83    6.83
  20  -1 -15    0.63    2.27
  21   2 -13    2.20    2.26
  20   2 -14  182.89   13.52
  19   2 -15    0.85    2.16
  18   2 -16   65.33    8.31
  17   2 -17    2.77    2.53
  16   2 -18   76.58    8.09
  15   2 -19    1.35    2.24
  14   2 -20   67.66    8.23
  13   2 -21    1.15    2.13
  22   2 -11    0.96    2.37
  21   2 -12   12.02    3.60
  20   2 -13    2.36    2.47
  19   2 -14   28.43    5.97
  18   2 -15    1.30    2.69
  17   2 -16    9.33    3.64
  16   2 -17   -1.24    2.61
  15   2 -18   32.40    5.97
  14   2 -19    1.77    2.77
  13   2 -20   12.19    4.47
  12   2 -21    0.79    2.53
  11   2 -22   15.36    4.54
  22   2 -10  127.22   10.61
  21   2 -11    0.16    2.25
  20   2 -12    4.52    3.24
  19   2 -13    1.33    2.26
  18   2 -14   53.02    7.50
  17   2 -15    0.68    2.94
  16   2 -16   28.09    5.75
  15   2 -17    1.17    2.26
  14   2 -18   43.25    6.59
  13   2 -19    2.82    2.96
  12   2 -20   14.22    4.00
  11   2 -21   -0.58    2.19
  10   2 -22    3.12    2.79
  23   2  -8   26.10    5.28
  22   2  -9    1.77    2.29
  21   2 -10   96.34    9.00
  20   2 -11    4.06    2.90
  19   2 -12    6.43    3.02
  18   2 -13   -1.18    1.94
  17   2 -14    4.76    3.15
  16   2 -15   -2.16    2.41
  15   2 -16  111.36    9.76
  14   2 -17   -0.01    2.54
  13   2 -18  150.04   11.36
  12   2 -19    0.21    2.42
  11   2 -20   26.28    5.21
  10   2 -21    1.36    2.58
   9   2 -22   25.22    5.29
   8   2 -23   -2.38    2.27
  23   2  -7    3.61    2.65
  22   2  -8   24.43    5.40
  21   2  -9    1.69    2.39
  20   2 -10  201.19   13.91
  19   2 -11   -0.08    2.86
  18   2 -12  159.57   11.84
  17   2 -13    2.15    2.30
  16   2 -14   44.85    6.63
  15   2 -15    3.28    2.51
  14   2 -16   34.35    5.80
  13   2 -17   -0.60    1.92
  12   2 -18   98.02    8.66
  11   2 -19   -0.36    2.00
  10   2 -20  247.49   15.33
   9   2 -21    0.08    2.67
   8   2 -22   90.74    8.38
   7   2 -23    3.19    2.96
  23   2  -6   16.51    4.34
  22   2  -7    1.07    2.20
  21   2  -8   14.61    4.30
  20   2  -9    0.98    2.57
  19   2 -10    1.56    2.01
  18   2 -11   -0.74    2.10
  17   2 -12    2.65    2.64
  16   2 -13    0.37    2.34
  15   2 -14   15.77    4.38
  14   2 -15   -1.70    2.23
  13   2 -16   62.12    6.73
  12   2 -17   -2.82    1.90
  11   2 -18   58.76    7.12
  10   2 -19    2.71    2.74
   9   2 -20   49.61    6.50
   8   2 -21    0.55    2.19
   7   2 -22  112.58    9.28
   6   2 -23   -1.82    2.45
  24   2  -4   21.88    5.14
  23   2  -5   -2.48    2.01
  22   2  -6   12.35    4.13
  21   2  -7   -2.25    1.83
  20   2  -8  105.27    9.02
  19   2  -9    2.64    2.46
  18   2 -10  129.32   10.24
  17   2 -11    1.74    2.57
  16   2 -12   23.93    5.07
  15   2 -13   -0.11    2.56
  14   2 -14  111.91    9.20
  13   2 -15   -0.54    2.32
  12   2 -16  316.49   18.11
  11   2 -17    0.19    2.89
  10   2 -18   12.81    4.16
   9   2 -19   -2.65    2.11
   8   2 -20   33.47    5.51
   7   2 -21   -3.21    1.89
   6   2 -22    1.88    2.58
   5   2 -23    2.20    2.15
  24   2  -3    1.94    2.48
  23   2  -4    2.08    2.65
  22   2  -5    5.34    3.02
  21   2  -6   45.59    6.62
  20   2  -7   -0.03    2.42
  19   2  -8   61.60    6.71
  18   2  -9   -1.13    2.31
  17   2 -10   59.55    6.48
  16   2 -11    0.77    2.31
  15   2 -12   -0.73    2.05
  14   2 -13    1.90    2.60
  13   2 -14  316.86   17.90
  12   2 -15   -1.96    2.00
  11   2 -16  109.96    8.81
  10   2 -17    0.39    2.08
   9   2 -18   36.09    5.63
   8   2 -19   -0.02    2.33
   7   2 -20   51.19    6.58
   6   2 -21    0.63    2.44
   5   2 -22   53.19    6.88
   4   2 -23   -0.50    2.17
  24   2  -2    6.95    3.36
  23   2  -3   -0.57    2.42
  22   2  -4   36.89    6.06
  21   2  -5    2.00    2.19
  20   2  -6  113.22    9.34
  19   2  -7    2.29    2.74
  18   2  -8  125.05    9.75
  17   2  -9   -0.63    1.75
  16   2 -10   87.74    7.82
  15   2 -11    3.29    2.22
  14   2 -12  133.88    9.88
  13   2 -13    1.92    2.37
  12   2 -14  300.37   17.01
  11   2 -15    1.23    2.30
  10   2 -16 1277.37   56.25
   9   2 -17   -1.59    2.01
   8   2 -18  642.52   30.86
   7   2 -19    1.55    2.35
   6   2 -20   64.29    6.80
   5   2 -21    1.08    2.34
   4   2 -22    9.69    3.47
  24   2  -1   12.22    3.62
  23   2  -2   19.52    4.65
  22   2  -3    3.50    2.43
  21   2  -4   13.91    4.19
  20   2  -5    1.17    2.34
  19   2  -6   29.32    5.37
  18   2  -7   -1.35    1.75
  17   2  -8    0.83    1.90
  16   2  -9   -0.81    1.96
  15   2 -10   16.96    4.16
  14   2 -11    0.88    2.05
  13   2 -12  117.75    8.98
  12   2 -13   -1.07    1.84
  11   2 -14   18.40    4.23
  10   2 -15    2.66    2.65
   9   2 -16   35.48    5.38
   8   2 -17   -1.63    1.85
   7   2 -18    5.51    3.11
   6   2 -19    1.85    1.93
   5   2 -20  116.68    9.07
   4   2 -21   -2.17    2.35
   3   2 -22   18.85    4.74
  23   2  -1   -2.26    1.93
  22   2  -2   84.69    7.82
  21   2  -3    0.86    2.04
  20   2  -4  195.06   12.75
  19   2  -5    2.46    2.24
  18   2  -6   50.39    6.32
  17   2  -7    3.62    2.23
  16   2  -8  228.49   13.94
  15   2  -9    0.99    2.12
  14   2 -10  104.51    8.23
  13   2 -11   -1.49    1.33
  12   2 -12    7.08    3.11
  11   2 -13   -0.28    2.12
  10   2 -14   33.34    5.03
   9   2 -15   -0.27    1.89
   8   2 -16   80.41    6.98
   7   2 -17    3.42    2.36
   6   2 -18  362.30   19.29
   5   2 -19    0.21    2.12
   4   2 -20    6.45    2.88
  -3  -2  21   -1.00    1.24
   3   2 -21    0.74    2.07
   2   2 -22   53.57    6.52
  -1  -2  23    0.38    2.24
   0  -2  24   38.80    5.96
  23   2   0    9.25    3.23
  22   2  -1    1.77    2.37
  21   2  -2    1.36    2.55
  20   2  -3    4.05    2.69
  19   2  -4   94.94    7.95
  18   2  -5    1.22    2.23
  17   2  -6  371.12   19.77
  16   2  -7   -0.74    1.76
  15   2  -8   93.71    7.74
  14   2  -9   -0.77    1.84
  13   2 -10   16.68    3.78
  12   2 -11   -1.29    1.88
  11   2 -12   48.55    5.90
  10   2 -13   -1.36    2.32
   9   2 -14  344.56   18.17
   8   2 -15   -1.63    2.05
   7   2 -16   92.37    7.58
  -6  -2  17    1.82    1.17
   6   2 -17    0.66    1.94
  -5  -2  18   42.04    4.44
   5   2 -18   49.63    5.87
   4   2 -19    1.92    2.17
  -4  -2  19    1.63    1.87
  -3  -2  20   44.44    4.65
  -2  -2  21    0.73    1.32
   2   2 -21    0.73    1.84
  -1  -2  22   41.99    5.67
   0  -2  23    0.24    1.80
   1  -2  24    2.90    2.41
  22   2   0    7.32    3.00
  21   2  -1    2.49    2.61
  20   2  -2   55.77    5.93
  19   2  -3   -0.47    1.93
  18   2  -4   13.33    3.61
  17   2  -5   -1.95    1.70
  16   2  -6  659.85   31.18
  15   2  -7    0.88    1.88
  14   2  -8   28.53    4.75
  13   2  -9    0.54    1.86
  12   2 -10   57.31    5.55
  11   2 -11    0.14    1.99
  10   2 -12   56.01    5.66
  -9  -2  13    1.40    0.94
   9   2 -13    0.56    2.03
  -8  -2  14  226.34   11.54
   8   2 -14  225.73   13.32
   7   2 -15    1.68    2.42
  -7  -2  15   -0.86    0.99
   6   2 -16    1.88    2.37
  -6  -2  16    2.33    1.47
   5   2 -17    0.58    2.14
  -5  -2  17   -0.37    1.04
   4   2 -18   29.73    4.68
  -4  -2  18   25.31    4.02
   3   2 -19    0.26    1.83
  -3  -2  19   -1.02    0.72
  -2  -2  20   12.37    3.30
   2   2 -20    8.78    3.37
   1   2 -21    0.53    1.93
  -1  -2  21   -0.17    1.58
   0  -2  22  401.87   21.04
   1  -2  23    4.25    2.69
   2  -2  24   76.67    7.63
  21   2   0    3.26    2.31
  20   2  -1   11.12    3.16
  19   2  -2    3.76    2.55
  18   2  -3    6.35    2.42
  17   2  -4   40.46    5.40
  16   2  -5   -0.58    1.99
  15   2  -6   51.72    6.02
  14   2  -7    1.36    2.08
  13   2  -8   54.00    5.50
  12   2  -9   -1.26    1.60
 -11  -2  10    9.54    1.78
  11   2 -10    8.28    2.67
 -11  -2  10    4.24    1.37
 -10  -2  11    1.14    0.89
  10   2 -11    0.13    1.76
 -10  -2  11   -0.40    0.81
  -9  -2  12   10.88    2.13
   9   2 -12    5.04    2.51
   8   2 -13    0.63    2.02
  -8  -2  13   -0.23    0.91
  -7  -2  14  220.05   11.33
   7   2 -14  216.41   12.79
   6   2 -15    2.22    2.41
  -6  -2  15    2.52    1.28
  -5  -2  16   23.52    3.56
   5   2 -16   28.65    4.56
   4   2 -17    0.17    2.06
  -4  -2  17    2.40    1.45
  -3  -2  18    0.95    0.76
   3   2 -18    2.56    2.53
  -2  -2  19   -2.10    1.35
   2   2 -19   -0.61    1.57
   1   2 -20    8.38    3.12
  -1  -2  20   10.35    3.06
   0   2 -21    0.28    1.91
   0  -2  21   -0.85    2.17
   1  -2  22    1.73    2.31
   2  -2  23   -1.69    2.10
  21   2   1    0.66    1.28
  21   2   1    0.79    1.28
  20   2   0  235.27   14.17
  19   2  -1    4.86    2.36
  18   2  -2  380.09   19.91
  17   2  -3   -1.06    1.82
  16   2  -4   38.19    5.23
  15   2  -5    2.95    2.28
  14   2  -6 1239.40   53.71
  13   2  -7   -1.46    1.62
  13   2  -7   -0.88    0.98
  12   2  -8  472.55   21.23
  12   2  -8  521.86   24.08
  11   2  -9    0.70    0.95
  11   2  -9    0.80    1.38
 -10  -2  10   74.29    4.67
 -10  -2  10   76.70    4.95
  10   2 -10   81.20    6.43
  -9  -2  11    2.08    1.12
  -9  -2  11    0.80    0.95
   9   2 -11   -0.20    1.37
  -8  -2  12    5.15    1.72
   8   2 -12    0.66    1.64
   7   2 -13    0.05    1.72
  -7  -2  13    0.36    0.96
  -6  -2  14 3290.83  126.34
   6   2 -14 3119.17  131.24
  -5  -2  15    0.74    1.17
   5   2 -15   -0.20    2.04
  -4  -2  16  138.12    8.51
   4   2 -16  133.19    9.12
  -3  -2  17    1.28    0.89
   3   2 -17   -1.05    2.01
  -2  -2  18   14.42    3.38
   2   2 -18   15.84    3.99
  -1  -2  19    1.44    1.59
   1   2 -19   -1.33    1.60
   0   2 -20    2.69    2.41
   0  -2  20    6.72    2.75
   1  -2  21    0.22    1.70
   2  -2  22  435.76   22.67
   3  -2  23   -0.86    1.81
  20   2   1   -1.16    1.10
  19   2   0   16.02    3.59
  19   2   0   15.82    3.59
  18   2  -1    0.52    2.06
  17   2  -2    8.05    2.96
  16   2  -3    0.79    1.18
  16   2  -3    0.02    2.01
  15   2  -4   29.17    4.50
  15   2  -4   30.31    3.46
  14   2  -5   -1.40    1.47
  14   2  -5   -1.55    1.13
  13   2  -6  122.90    7.00
  13   2  -6  128.84    8.58
  12   2  -7   -0.24    0.74
  12   2  -7   -1.06    1.26
  11   2  -8   -1.73    1.18
  11   2  -8    0.18    1.10
  10   2  -9    0.19    1.46
  10   2  -9   -1.08    0.73
  -9  -2  10   21.72    2.51
  -9  -2  10   19.36    2.50
   9   2 -10   22.53    3.80
   8   2 -11   -2.97    1.01
  -8  -2  11   -0.46    0.95
  -8  -2  11   -0.05    0.79
  -7  -2  12  113.61    6.93
   7   2 -12  121.33    8.16
   6   2 -13    0.99    1.70
  -6  -2  13   -0.01    0.98
   5   2 -14   26.05    4.25
  -5  -2  14   24.29    3.46
  -4  -2  15    1.73    1.31
   4   2 -15    2.76    2.18
   3   2 -16    3.43    2.24
  -2  -2  17   -1.49    1.32
   2   2 -17    0.27    2.03
   1   2 -18   62.16    5.93
  -1  -2  18   63.81    5.87
   0   2 -19    0.45    2.06
   0  -2  19   -1.61    1.40
   1  -2  20    6.47    2.74
   2  -2  21   -0.08    1.97
   3  -2  22    4.88    2.87
   4  -2  23   -0.71    2.03
  20   2   2  180.34   11.71
  19   2   1    0.32    1.26
  18   2   0    6.05    2.85
  18   2   0   11.21    2.70
  17   2  -1    1.77    2.10
  17   2  -1   -0.62    1.22
  16   2  -2  210.54   12.55
  16   2  -2  217.53   11.30
  15   2  -3    0.34    1.32
  15   2  -3   -0.22    1.50
  14   2  -4  408.20   20.05
  14   2  -4  398.87   18.21
  13   2  -5   -0.35    1.05
  13   2  -5    1.50    1.66
  12   2  -6   29.26    4.20
  12   2  -6   27.36    2.99
  11   2  -7    0.00    0.86
  11   2  -7    0.25    1.55
  10   2  -8  140.77    7.42
  10   2  -8  132.96    8.63
   9   2  -9    1.09    1.63
   8   2 -10    7.70    2.56
  -8  -2  10   12.51    2.05
  -8  -2  10   13.83    2.22
  -7  -2  11    0.41    0.98
   7   2 -11   -2.74    1.18
  -7  -2  11   -1.74    0.59
  -6  -2  12 1386.32   55.71
   6   2 -12 1370.53   58.59
   5   2 -13    1.22    0.93
   5   2 -13    0.66    1.77
  -5  -2  13   -1.13    1.13
   4   2 -14    8.74    2.76
  -4  -2  14    7.11    1.82
   4   2 -14    9.03    1.95
   3   2 -15    2.10    1.31
  -3  -2  15   -0.67    0.97
   3   2 -15    1.03    1.64
   2   2 -16  343.46   18.24
   2   2 -16  364.86   17.26
  -2  -2  16  361.34   17.69
   1   2 -17    2.18    1.31
   1   2 -17   -0.68    1.62
  -1  -2  17    0.65    1.59
   0  -2  18   62.60    5.94
   0   2 -18   73.13    6.38
   1  -2  19    0.23    1.72
   2  -2  20  623.95   29.55
   3  -2  21    1.14    2.26
   4  -2  22    6.23    3.25
   5  -2  23   -1.40    2.18
  20   2   3    1.11    1.98
  19   2   2    6.04    2.75
  19   2   2    7.96    3.01
  18   2   1    5.84    2.07
  18   2   1   -0.30    0.99
  17   2   0    7.72    2.68
  17   2   0   10.42    2.64
  16   2  -1    4.81    2.30
  16   2  -1    2.50    1.51
  15   2  -2  177.42   10.77
  15   2  -2  180.29    9.77
  14   2  -3   -0.40    0.81
  14   2  -3    1.75    1.91
  13   2  -4   13.27    2.46
  13   2  -4   15.67    3.50
  12   2  -5   -0.47    1.07
  12   2  -5    0.74    1.46
  11   2  -6  665.10   27.91
  11   2  -6  667.40   30.14
  10   2  -7    0.08    0.83
  10   2  -7    0.21    1.13
   9   2  -8   97.10    4.94
   9   2  -8   87.28    5.48
   9   2  -8   95.55    6.67
  -8  -2   9    1.08    0.94
   8   2  -9   -0.97    0.47
   8   2  -9    0.71    1.20
  -8  -2   9    0.27    0.81
   7   2 -10   28.36    3.89
   7   2 -10   33.46    2.51
  -7  -2  10   33.08    2.85
  -7  -2  10   31.96    2.92
   6   2 -11   -0.59    1.25
  -6  -2  11    0.06    0.73
   6   2 -11    0.93    0.87
  -5  -2  12  114.41    7.02
   5   2 -12  123.41    6.56
   5   2 -12  111.35    7.78
   4   2 -13    1.81    2.05
  -4  -2  13    0.90    0.71
   4   2 -13    0.64    1.07
   3   2 -14   56.07    4.22
   3   2 -14   56.46    5.36
  -2  -2  15   -0.66    1.35
   2   2 -15    2.70    1.40
   2   2 -15   -0.57    1.54
   1   2 -16  407.25   18.72
  -1  -2  16  376.68   19.12
   1   2 -16  398.70   19.83
   0  -2  17    2.32    1.91
   0   2 -17    1.73    2.03
   1  -2  18   18.06    3.77
  -1   2 -18   12.55    3.34
   2  -2  19   -1.71    1.55
   3  -2  20    4.28    2.67
   4  -2  21    3.00    2.37
   5  -2  22    3.21    2.64
   6  -2  23    4.18    2.23
  22   2   6   13.09    3.56
  21   2   5   -2.22    1.99
  20   2   4  139.18    9.52
  19   2   3    0.77    1.46
  18   2   2  174.34   11.08
  18   2   2  184.84   10.87
  17   2   1    0.41    1.10
  17   2   1    0.06    1.30
  15   2  -1   -0.39    1.09
  15   2  -1    0.32    1.60
  14   2  -2    1.89    1.87
  14   2  -2    2.95    1.44
  13   2  -3    1.36    1.39
  13   2  -3   -0.40    1.53
  12   2  -4 2875.52  118.82
  12   2  -4 2936.53  113.96
  11   2  -5    3.69    1.57
  11   2  -5   -1.16    0.97
  10   2  -6 1027.51   41.35
  10   2  -6 1004.62   43.83
   9   2  -7    1.52    1.51
   9   2  -7    0.01    0.92
   8   2  -8 1862.23   74.74
   8   2  -8 1845.89   76.86
   8   2  -8 1848.23   73.29
   7   2  -9   -0.42    1.21
   7   2  -9   -0.51    0.63
  -7  -2   9    0.23    0.71
  -7  -2   9   -0.93    0.66
   6   2 -10    2.20    0.84
  -6  -2  10    1.27    0.93
   6   2 -10    2.76    1.73
  -6  -2  10    2.48    1.08
  -5  -2  11   -0.02    0.86
   5   2 -11    1.40    0.90
   5   2 -11   -0.55    1.24
   4   2 -12 1882.71   75.40
   4   2 -12 1812.90   76.94
   3   2 -13   -0.95    0.96
   3   2 -13   -0.81    1.60
  -3  -2  13   -0.55    1.06
   2   2 -14  704.89   31.54
   2   2 -14  685.09   30.22
  -2  -2  14  696.08   30.27
   1   2 -15    0.78    1.61
   1   2 -15    0.91    0.94
  -1  -2  15    0.42    1.27
   0   2 -16    2.89    1.95
   0  -2  16    0.78    1.70
   1  -2  17    1.68    2.02
  -1   2 -17   -0.51    1.44
   2  -2  18  276.16   15.29
   3  -2  19    0.25    1.71
   4  -2  20  907.62   40.88
   5  -2  21    0.55    1.83
   6  -2  22  124.71   10.00
  22   2   7   -0.38    1.90
  21   2   6  112.33    8.82
  20   2   5   -1.56    1.81
  19   2   4   -1.04    1.64
  18   2   3    1.01    1.82
  18   2   3    0.08    1.45
  17   2   2   35.02    4.52
  17   2   2   36.21    4.58
  16   2   1    0.75    1.37
  16   2   1    1.29    1.36
  15   2   0   22.84    3.29
  14   2  -1    1.40    1.67
  14   2  -1    0.19    1.34
  13   2  -2    2.72    1.65
  13   2  -2    5.53    1.86
  12   2  -3   -0.68    0.88
  12   2  -3    0.75    1.67
  11   2  -4  360.74   16.08
  11   2  -4  354.94   17.46
  10   2  -5   -2.19    1.19
  10   2  -5    1.08    0.97
   9   2  -6   13.08    2.76
   9   2  -6    6.47    1.58
   8   2  -7    0.24    0.92
   8   2  -7   -0.98    1.05
   8   2  -7    0.47    0.47
   7   2  -8   24.65    1.87
   7   2  -8   24.38    3.47
   7   2  -8   24.40    2.72
   6   2  -9   -0.04    0.55
  -6  -2   9   -0.58    0.58
   6   2  -9    0.66    1.37
  -6  -2   9   -0.81    0.66
   5   2 -10   14.30    2.99
  -5  -2  10   15.90    2.32
   5   2 -10   18.43    1.82
  -5  -2  10   12.40    2.21
   4   2 -11   -1.04    1.33
   4   2 -11   -0.04    0.74
  -4  -2  11   -0.50    0.36
   3   2 -12  123.28    6.61
  -3  -2  12  116.10    7.15
   3   2 -12  114.15    7.66
   2   2 -13    0.73    1.27
  -2  -2  13   -0.82    0.91
   2   2 -13   -0.29    0.89
  -1  -2  14  446.04   21.03
   1   2 -14  450.24   20.59
   1   2 -14  469.67   21.94
   0  -2  15   -0.68    1.19
   0   2 -15   -1.28    1.60
  -1   2 -16  113.44    7.96
   1  -2  16  136.60    8.67
   2  -2  17   -0.50    1.77
   3  -2  18    3.12    2.15
   4  -2  19    0.09    1.92
   5  -2  20   20.53    4.62
   6  -2  21    1.17    2.16
   7  -2  22   67.71    7.20
  22   2   8   62.13    7.20
  21   2   7   -1.46    1.83
  20   2   6   56.65    6.49
  19   2   5    3.65    2.10
  18   2   4   45.57    5.39
  17   2   3   -0.86    1.47
  17   2   3    1.30    1.40
  16   2   2  186.13   10.63
  16   2   2  193.99   11.18
  15   2   1    5.54    1.70
  15   2   1   -1.47    1.20
  12   2  -2  181.45    9.52
  12   2  -2  181.12   10.25
  11   2  -3   -0.37    1.38
  11   2  -3   -0.45    0.89
  10   2  -4  192.18   10.40
  10   2  -4  179.72    9.20
   9   2  -5   -0.17    1.24
   9   2  -5   -0.38    0.84
   8   2  -6  238.80   11.22
   8   2  -6  236.77   12.30
   7   2  -7   -0.02    1.20
   7   2  -7   -0.20    0.66
   7   2  -7   -0.26    0.43
   6   2  -8  565.37   22.92
  -6  -2   8  531.77   21.98
   6   2  -8  524.82   24.78
  -6  -2   8  574.62   23.46
   5   2  -9    0.67    0.66
  -5  -2   9    0.74    0.71
  -5  -2   9    0.25    0.61
   5   2  -9   -0.31    1.24
   4   2 -10 1103.76   47.33
   4   2 -10 1119.09   45.62
   3   2 -11   -0.82    1.27
  -3  -2  11   -0.09    0.98
   3   2 -11    0.71    0.77
  -2  -2  12  305.90   14.87
   2   2 -12  302.64   15.53
   2   2 -12  316.62   14.35
  -1  -2  13   -0.31    0.85
   1   2 -13    1.85    0.89
   1   2 -13   -0.22    1.15
   0   2 -14   78.83    6.12
   0  -2  14   69.65    5.79
  -1   2 -15   -1.59    1.34
   1  -2  15    1.64    1.56
   2  -2  16    4.11    2.39
   3  -2  17   -1.47    1.60
   4  -2  18   83.63    7.12
   5  -2  19    3.20    2.38
   6  -2  20   18.46    4.10
   7  -2  21   -0.53    2.07
   8  -2  22   21.62    4.58
  22   2   9   -2.38    1.75
  21   2   8   64.65    6.69
  20   2   7    0.87    2.05
  19   2   6  118.29    8.71
  18   2   5    1.81    2.13
  17   2   4   86.35    6.86
  16   2   3   -0.68    1.33
  16   2   3    3.85    1.88
  15   2   2  327.23   15.84
  15   2   2  308.01   15.95
  12   2  -1    0.40    1.17
  12   2  -1   -0.10    1.41
  11   2  -2  206.17   10.29
  11   2  -2  198.30   10.87
  10   2  -3    0.44    1.11
  10   2  -3   -1.37    1.19
   9   2  -4   11.15    1.97
   9   2  -4    9.38    2.28
   8   2  -5    1.07    1.32
   8   2  -5   -0.18    0.74
   7   2  -6  786.04   34.96
   7   2  -6  814.01   32.98
   7   2  -6  829.78   33.27
   6   2  -7   -0.13    1.20
   6   2  -7   -1.28    0.62
   6   2  -7   -0.33    0.37
   5   2  -8  809.00   36.13
   5   2  -8  860.59   34.32
   4   2  -9   -1.08    1.11
  -4  -2   9   -0.74    0.43
  -4  -2   9    0.34    0.49
   4   2  -9   -0.18    0.56
   3   2 -10  121.75    7.55
  -3  -2  10  109.55    6.62
   3   2 -10  115.12    5.99
   2   2 -11    2.20    1.86
  -2  -2  11    1.33    1.21
   2   2 -11   -1.22    0.80
   1   2 -12  394.78   17.71
   1   2 -12  386.00   18.93
  -1  -2  12  401.66   18.36
   0   2 -13    1.94    1.29
   0  -2  13    0.48    1.15
   1  -2  14   20.49    3.54
  -1   2 -14   17.84    3.28
   2  -2  15   -2.24    1.21
   3  -2  16  142.16    9.41
   4  -2  17    0.19    1.84
   5  -2  18   52.78    6.32
   6  -2  19   -1.93    1.81
   7  -2  20   26.63    5.10
   8  -2  21    1.91    2.68
   9  -2  22   18.34    4.17
  21   2   9    1.02    2.03
  20   2   8   45.42    5.99
  19   2   7   -1.10    1.94
  18   2   6  181.10   11.38
  17   2   5    0.85    2.06
  16   2   4   95.30    6.79
  16   2   4   95.95    7.20
  15   2   3    2.09    1.53
  15   2   3    3.87    1.48
  14   2   2  964.86   40.90
  14   2   2  979.23   42.03
  13   2   1    0.98    1.43
  13   2   1    1.29    1.74
  11   2  -1    2.11    1.48
  11   2  -1    3.28    1.41
  10   2  -2 1992.70   84.34
  10   2  -2 2119.96   81.46
   9   2  -3    0.52    0.98
   9   2  -3    1.34    1.22
   8   2  -4  322.52   15.61
   8   2  -4  330.42   14.64
   7   2  -5   -1.41    0.94
   7   2  -5   -1.54    0.70
   6   2  -6  329.33   13.80
   6   2  -6  337.56   14.83
   6   2  -6  324.40   15.74
   5   2  -7   -0.27    1.16
   5   2  -7   -0.38    0.68
   5   2  -7    0.25    0.35
   4   2  -8  955.86   35.37
  -4  -2   8  674.06   31.13
   3   2  -9    0.65    0.62
  -3  -2   9    0.92    0.97
   3   2  -9   -1.81    1.22
  -2  -2  10 4057.26  162.17
   2   2 -10 4154.28  168.06
   2   2 -10 4273.31  167.03
   1   2 -11   -0.32    1.34
   1   2 -11    0.82    0.76
  -1  -2  11   -1.25    0.72
   0  -2  12   44.11    4.15
   0   2 -12   48.96    4.52
  -1   2 -13    1.60    1.38
   1  -2  13   -0.77    1.28
   2  -2  14    0.26    1.35
   3  -2  15   -0.56    1.62
   4  -2  16   32.23    4.90
   5  -2  17   -1.41    1.74
   6  -2  18  815.97   37.02
   7  -2  19   -4.43    1.58
   8  -2  20    6.99    3.16
   9  -2  21   -2.86    1.94
  21   2  10    3.34    2.43
  20   2   9    1.59    1.83
  19   2   8   19.22    4.23
  18   2   7   -0.10    1.48
  17   2   6    7.92    2.74
  16   2   5   -0.40    1.75
  15   2   4  238.80   12.92
  15   2   4  237.15   12.66
  14   2   3    0.34    1.63
  14   2   3    1.92    1.70
  13   2   2   33.41    3.95
  13   2   2   36.91    3.90
  12   2   1    0.14    1.38
  12   2   1    0.73    1.49
  11   2   0   87.36    5.94
  11   2   0   99.96    6.10
  10   2  -1    0.63    0.94
  10   2  -1    0.04    1.02
   9   2  -2   25.45    2.73
   9   2  -2   29.35    3.40
   8   2  -3    1.27    1.27
   8   2  -3   -0.96    0.68
   7   2  -4  459.62   20.99
   7   2  -4  538.95   22.39
   6   2  -5   -0.37    1.00
   6   2  -5    0.30    0.28
   6   2  -5   -0.50    0.71
   5   2  -6 1280.55   51.65
   5   2  -6 1265.25   53.80
   5   2  -6 1328.67   52.11
   4   2  -7   -1.11    1.13
  -4  -2   7    0.26    0.66
   4   2  -7    0.83    0.34
  -4  -2   7    0.34    0.65
   3   2  -8   37.73    3.69
   3   2  -8   41.92    2.52
  -3  -2   8   41.15    3.30
  -3  -2   8   35.21    3.02
   2   2  -9   -0.04    0.45
  -2  -2   9   -1.14    0.60
   2   2  -9   -0.74    1.16
  -1  -2  10   10.23    2.30
   1   2 -10   10.58    2.70
   0  -2  11    0.91    1.32
   0   2 -11    0.21    1.35
   1  -2  12   12.02    2.53
  -1   2 -12   10.06    2.46
   2  -2  13    0.31    1.49
   3  -2  14    1.55    1.51
   4  -2  15   -0.07    1.75
   5  -2  16  136.08    9.31
   6  -2  17   -0.05    1.61
   7  -2  18   78.30    7.29
   8  -2  19    2.59    2.16
   9  -2  20   36.02    5.92
  10  -2  21   -0.60    2.01
  21   2  11    3.81    1.98
  20   2  10  163.57   11.31
  19   2   9    1.15    2.17
  18   2   8   -0.35    1.84
  17   2   7    1.11    1.77
  16   2   6  839.41   36.73
  15   2   5    2.64    1.88
  14   2   4  284.63   14.87
  14   2   4  306.04   14.92
  13   2   3   -0.58    1.19
  13   2   3   -0.28    1.48
  12   2   2   66.47    5.07
  12   2   2   63.48    4.99
  11   2   1    1.46    1.33
  11   2   1    1.37    1.27
  10   2   0  113.22    6.68
  10   2   0  112.38    6.70
   9   2  -1   -0.82    0.49
   9   2  -1    0.25    0.99
   8   2  -2 6056.71  233.29
   8   2  -2 6004.28  241.23
   7   2  -3   -0.51    0.67
   7   2  -3    0.53    0.93
   6   2  -4   19.44    2.64
   6   2  -4   19.85    2.36
   5   2  -5    0.04    1.11
   5   2  -5   -0.65    0.64
   4   2  -6    6.16    1.52
   4   2  -6    6.46    1.95
   4   2  -6    7.52    0.72
   3   2  -7   -2.35    0.86
   3   2  -7    0.78    0.42
  -3  -2   7   -0.80    0.65
  -3  -2   7   -0.96    0.57
   2   2  -8   59.99    3.33
  -2  -2   8   59.00    4.17
  -2  -2   8   59.93    3.99
   2   2  -8   55.78    4.40
  -1  -2   9   -0.94    0.72
   1   2  -9   -0.78    1.11
   0   2 -10 1070.05   44.09
   0  -2  10 1000.05   42.46
   1  -2  11   -0.51    1.27
  -1   2 -11   -0.50    1.00
   2  -2  12   67.27    5.29
   3  -2  13    0.56    1.48
   4  -2  14   54.31    5.16
   5  -2  15    7.15    2.57
   6  -2  16  308.77   16.59
   7  -2  17   -0.01    1.82
   8  -2  18   73.90    7.15
   9  -2  19   -0.85    1.94
  10  -2  20    3.25    2.49
  11  -2  21    1.08    2.10
  20   2  11   -0.95    1.60
  19   2  10  123.25    9.33
  18   2   9   -0.87    1.74
  17   2   8  126.80    8.91
  16   2   7   -0.95    1.58
  15   2   6   15.51    3.50
  14   2   5    0.18    1.50
  14   2   5    0.65    1.56
  13   2   4   88.36    5.88
  13   2   4   72.77    5.82
  12   2   3    0.18    1.06
  12   2   3    0.18    1.26
  11   2   2 1181.10   49.33
  11   2   2 1170.30   48.17
  10   2   1    0.92    1.48
  10   2   1   -1.30    1.19
   9   2   0  249.76   12.03
   9   2   0  242.88   11.79
   8   2  -1    0.70    1.01
   8   2  -1   -0.27    0.41
   7   2  -2   13.89    2.14
   7   2  -2   17.84    2.47
   6   2  -3    0.10    0.82
   6   2  -3   -0.91    0.85
   5   2  -4  547.22   22.99
   5   2  -4  548.16   23.96
   4   2  -5   -0.16    1.03
   4   2  -5    0.15    0.80
   3   2  -6 1447.39   59.77
  -2  -2   7    0.77    0.80
  -2  -2   7   -0.88    0.59
   2   2  -7   -0.92    1.03
   1   2  -8   94.49    6.14
  -1  -2   8  101.60    5.87
   0  -2   9   -0.37    0.89
   0   2  -9    1.15    1.38
   1  -2  10  109.51    6.84
  -1   2 -10  114.32    7.02
   2  -2  11    1.05    1.34
   3  -2  12  272.68   13.94
   4  -2  13   -0.70    1.18
   5  -2  14   83.57    6.74
   6  -2  15   -0.76    1.83
   7  -2  16  141.47    9.77
   8  -2  17    0.20    1.92
   9  -2  18  109.44    9.03
  10  -2  19    0.17    2.06
  11  -2  20   76.49    7.67
  20   2  12   37.73    5.90
  19   2  11    1.79    2.20
  18   2  10  136.06    9.85
  17   2   9   -0.79    1.78
  16   2   8  187.73   11.42
  15   2   7    2.16    2.04
  14   2   6  440.87   20.86
  13   2   5    0.25    1.24
  13   2   5   -0.05    1.37
  12   2   4   75.62    5.24
  12   2   4   65.77    5.20
  11   2   3    2.83    1.55
  11   2   3    1.11    1.41
  10   2   2 1839.17   74.92
  10   2   2 1823.97   73.10
  10   2   2 1828.90   74.90
   9   2   1   -0.17    1.08
   9   2   1   -1.51    0.89
   8   2   0 1402.88   58.09
   8   2   0 1424.06   56.55
   7   2  -1   -0.04    0.43
   7   2  -1   -0.25    0.80
   6   2  -2  320.74   13.85
   6   2  -2  295.81   14.13
   5   2  -3   -0.22    0.68
   5   2  -3   -0.98    0.85
   4   2  -4  313.21   14.58
   4   2  -4  315.10   13.91
   3   2  -5   -0.93    0.88
   3   2  -5   -0.51    0.67
   2   2  -6  475.88   21.18
  -2  -2   6  483.46   20.29
  -2  -2   6  469.89   19.15
   1   2  -7    0.58    1.11
  -1  -2   7   -0.36    0.72
  -1  -2   7    0.19    0.69
   0   2  -8 1938.07   82.44
   0  -2   8 2099.36   79.83
  -1   2  -9   -0.55    1.02
   1  -2   9   -0.08    1.11
   2  -2  10    6.81    2.11
   3  -2  11   -0.13    1.23
   4  -2  12   39.56    4.17
   5  -2  13   -0.67    1.04
   6  -2  14   70.98    6.13
   7  -2  15   -0.94    1.82
   8  -2  16  663.33   30.85
   9  -2  17   -0.09    2.25
  10  -2  18   39.41    5.76
  11  -2  19   -0.45    2.14
  12  -2  20   78.47    7.86
  19   2  12    1.83    1.96
  18   2  11   -1.40    1.78
  17   2  10   20.42    4.52
  16   2   9   -1.84    1.61
  15   2   8  124.53    8.71
  14   2   7   -1.70    1.68
  13   2   6    5.30    2.21
  12   2   5    0.83    1.38
  12   2   5   -0.06    1.28
  11   2   4    4.85    1.54
  11   2   4    7.50    2.14
  10   2   3   -0.14    1.38
  10   2   3   -0.58    1.20
   9   2   2   22.53    2.99
   9   2   2   23.11    2.74
   8   2   1   -2.27    0.87
   8   2   1   -0.63    0.99
   7   2   0   73.02    4.65
   7   2   0   70.24    4.62
   6   2  -1    0.26    0.96
   6   2  -1    0.06    0.36
   5   2  -2   37.26    3.07
   5   2  -2   35.53    2.81
   4   2  -3   -0.06    0.83
   4   2  -3   -0.51    1.01
   3   2  -4  495.01   22.52
   3   2  -4  593.27   23.71
   2   2  -5   -0.17    0.98
   2   2  -5   -0.53    0.53
   1   2  -6   89.32    5.50
  -1  -2   6   83.27    5.12
  -1  -2   6   90.65    4.95
   0  -2   7    0.66    0.83
   0   2  -7    0.40    1.09
  -1   2  -8   69.40    4.92
   1  -2   8   70.75    4.74
   2  -2   9   -0.43    1.08
   3  -2  10   90.57    6.14
   4  -2  11    1.78    1.16
   5  -2  12   46.52    4.54
   6  -2  13    0.93    1.65
   7  -2  14   81.59    6.84
   8  -2  15   -1.18    1.85
   9  -2  16   51.68    6.38
  10  -2  17    0.64    2.32
  11  -2  18    5.90    3.46
  12  -2  19    0.50    2.36
  19   2  13   -0.35    1.93
  18   2  12  228.61   14.36
  17   2  11   -0.59    1.84
  16   2  10  264.80   15.17
  15   2   9    0.68    2.09
  14   2   8  741.23   33.12
  13   2   7   -2.00    1.43
  12   2   6   89.79    6.45
  11   2   5   -1.19    0.80
  11   2   5    1.05    1.25
  10   2   4 1949.18   76.33
  10   2   4 1790.60   74.71
   9   2   3    0.04    0.95
   9   2   3    0.19    0.94
   9   2   3    0.22    1.07
   8   2   2 1733.87   68.68
   8   2   2 1714.45   70.06
   7   2   1   -0.86    0.66
   7   2   1    0.09    0.99
   6   2   0 3149.65  125.67
   6   2   0 3109.33  121.96
   5   2  -1   -0.54    0.68
   5   2  -1    0.08    0.37
   4   2  -2  240.83   10.92
   4   2  -2  239.89   11.25
   3   2  -3   -0.20    1.01
   3   2  -3   -0.28    0.65
   2   2  -4   65.75    4.19
   2   2  -4   74.61    4.58
  -1  -2   5    0.85    0.87
  -1  -2   5    0.74    0.81
   1   2  -5   -0.35    0.91
   0  -2   6 1911.98   75.17
   0   2  -6 1840.15   77.62
   0  -2   6 1970.33   71.07
  -1   2  -7    0.53    1.13
   1  -2   7    0.88    0.95
   2  -2   8 2552.07  100.46
   3  -2   9    0.23    1.15
   4  -2  10   19.73    3.10
   5  -2  11    2.45    1.48
   6  -2  12    2.14    1.59
   7  -2  13    1.54    2.13
   8  -2  14  175.28   11.10
   9  -2  15   -1.37    1.99
  10  -2  16  244.99   14.73
  11  -2  17    1.56    2.33
  12  -2  18   58.84    7.28
  13  -2  19   -3.62    1.85
  19   2  14   -0.63    1.64
  18   2  13    1.32    2.18
  17   2  12  150.26   10.80
  16   2  11   -0.50    1.89
  15   2  10   85.29    7.32
  14   2   9    1.14    1.83
  13   2   8   54.15    5.42
  12   2   7    1.68    1.47
  11   2   6   94.19    5.72
  11   2   6   92.99    6.52
  10   2   5   -0.14    1.00
  10   2   5    0.45    1.27
   9   2   4  160.88    8.11
   9   2   4  154.89    8.68
   8   2   3    0.05    1.01
   8   2   3    0.34    0.86
   7   2   2  596.48   25.80
   7   2   2  626.14   25.90
   6   2   1   -0.15    0.71
   6   2   1    0.18    0.91
   5   2   0  136.51    7.47
   5   2   0  169.01    7.65
   4   2  -1    0.36    0.35
   4   2  -1    0.21    0.78
   3   2  -2 1571.30   61.77
   3   2  -2 1559.13   63.68
   2   2  -3   -1.65    0.57
   2   2  -3   -0.41    0.93
   1   2  -4 1131.33   46.22
   1   2  -4 1106.23   44.69
   0  -2   5   -0.44    0.63
   0  -2   5   -0.54    0.75
   1  -2   6   -0.19    1.12
  -1   2  -6   -1.68    1.09
   2  -2   7   -0.66    0.80
   3  -2   8  132.82    7.55
   4  -2   9    1.16    1.29
   5  -2  10 1101.37   45.81
   6  -2  11    0.73    1.62
   7  -2  12  145.67    9.33
   8  -2  13   -2.71    1.96
   9  -2  14   30.30    4.85
  10  -2  15   -1.29    2.20
  11  -2  16  216.29   13.62
  12  -2  17    3.85    2.48
  13  -2  18  167.81   12.19
  14  -2  19    0.47    1.78
  18   2  14   15.66    4.25
  17   2  13   -0.71    1.88
  16   2  12  195.86   12.71
  15   2  11   -2.36    1.71
  14   2  10    1.99    2.01
  13   2   9    1.70    1.94
  12   2   8  261.05   14.01
  11   2   7    0.84    1.45
  10   2   6  269.18   12.16
  10   2   6  245.24   13.01
   9   2   5    0.01    1.31
   9   2   5    0.06    0.94
   8   2   4  122.70    6.18
   8   2   4  110.16    6.81
   7   2   3   -0.56    0.72
   7   2   3   -0.22    1.00
   6   2   2  425.16   18.74
   6   2   2  453.81   19.07
   5   2   1   -0.04    0.84
   5   2   1    0.02    0.61
  -5  -2  -1   -0.81    0.45
   4   2   0  456.61   18.79
   4   2   0  421.02   18.54
  -3  -2   1   -0.58    0.32
   3   2  -1   -1.69    0.68
   3   2  -1   -1.02    0.35
   1   2  -3   -0.21    0.86
   1   2  -3   -0.08    0.75
   0   2  -4  912.26   38.73
   0  -2   4  945.62   37.62
   0  -2   4  947.18   35.54
  -1   2  -5   -0.23    0.83
   1  -2   5    0.08    0.90
   1  -2   5    0.59    0.85
   2  -2   6 1281.42   51.26
   3  -2   7   -1.52    0.91
   4  -2   8  243.75   12.05
   5  -2   9    0.08    1.26
   6  -2  10   32.29    4.00
   7  -2  11    0.15    1.60
   8  -2  12  811.23   35.58
   9  -2  13   -1.15    2.00
  10  -2  14  820.20   36.77
  11  -2  15   -0.09    2.36
  12  -2  16  355.79   19.55
  13  -2  17   -0.05    2.36
  14  -2  18   43.95    6.60
  18   2  15   -0.59    1.70
  17   2  14   35.45    5.83
  16   2  13    1.51    1.97
  15   2  12   79.00    7.12
  14   2  11    0.95    1.88
  13   2  10   11.03    3.08
  12   2   9    0.11    1.64
  11   2   8   39.36    4.65
  10   2   7   -0.71    1.03
   9   2   6  144.54    8.71
   9   2   6  160.93    7.73
   8   2   5   -1.10    0.89
   8   2   5   -0.45    0.73
   7   2   4   35.51    2.50
   7   2   4   31.11    3.06
   6   2   3   -0.04    0.88
  -6  -2  -3    0.74    0.74
   6   2   3    0.64    0.65
  -5  -2  -2   15.54    1.76
   5   2   2   15.81    2.21
   5   2   2   15.73    1.63
   4   2   1    0.24    0.72
  -4  -2  -1   -0.31    0.50
   3   2   0  325.20   13.73
   3   2   0  302.70   13.60
  -2  -2   1    1.29    0.37
   2   2  -1    1.13    0.77
   1   2  -2   37.04    2.77
   1   2  -2   35.54    2.71
   0   2  -3    0.17    0.68
   0   2  -3    0.38    0.84
   1  -2   4  142.71    6.64
   1  -2   4  131.79    6.93
   2  -2   5    0.18    1.12
   3  -2   6  717.07   29.72
   5  -2   8    5.89    2.02
   6  -2   9    1.40    1.48
   7  -2  10    0.92    1.73
   8  -2  11    0.20    1.79
   9  -2  12    0.92    2.10
  10  -2  13    3.24    2.53
  11  -2  14    1.61    2.45
  12  -2  15   -0.53    2.20
  13  -2  16  113.66    9.22
  14  -2  17    2.52    2.14
  15  -2  18    2.65    2.36
  17   2  15    0.88    1.80
  16   2  14  140.85   10.44
  15   2  13   -0.32    1.76
  14   2  12  370.58   19.34
  13   2  11    3.55    2.13
  12   2  10  768.59   34.08
  11   2   9   -0.09    1.61
  10   2   8  144.20    8.73
   9   2   7   -1.03    0.83
   8   2   6    9.48    1.38
   8   2   6    9.20    2.38
  -7  -2  -5    0.11    0.91
   7   2   5    1.20    0.69
   7   2   5    0.34    1.05
   6   2   4 2832.93  108.49
   6   2   4 2706.17  110.69
  -5  -2  -3   -2.22    0.66
   5   2   3   -0.47    0.98
   5   2   3    0.19    0.58
   4   2   2 4323.24  172.88
  -4  -2  -2 4326.40  173.50
   4   2   2 4362.90  168.09
   3   2   1   -0.07    0.65
  -3  -2  -1   -0.51    0.44
   3   2   1   -0.98    0.57
   2   2   0   29.30    2.22
   2   2   0   26.81    2.30
  -2  -2   0   31.43    1.80
   1   2  -1   -0.36    0.68
   1   2  -1   -0.95    0.47
   0   2  -2    2.89    1.01
   0   2  -2    2.55    0.92
   1  -2   3   -0.08    0.71
   1  -2   3   -0.69    0.62
   2  -2   4 3388.24  131.47
   2  -2   4 3377.91  124.20
   3  -2   5   -1.46    0.84
   4  -2   6 5167.94  200.49
   5  -2   7    1.33    1.33
   6  -2   8   51.46    4.43
   7  -2   9   -0.87    1.11
   8  -2  10  146.58    9.10
   9  -2  11   -2.18    1.63
  10  -2  12  459.33   22.29
  11  -2  13    1.38    2.60
  12  -2  14  945.91   42.04
  13  -2  15   -1.63    2.11
  14  -2  16    0.60    2.26
  15  -2  17   -2.51    1.76
  17   2  16    4.78    2.08
  16   2  15   -1.26    1.83
  15   2  14    3.20    2.24
  14   2  13    0.23    1.98
  13   2  12   16.43    3.99
  12   2  11   -0.43    1.50
  11   2  10   10.25    3.11
  10   2   9    0.30    1.28
   9   2   8    4.66    1.86
   8   2   7   -0.07    0.69
   8   2   7   -0.37    1.09
   7   2   6  204.41   10.76
  -7  -2  -6  212.92   10.62
   7   2   6  213.76    9.35
   6   2   5   -0.53    0.98
  -6  -2  -5   -0.95    0.68
   6   2   5    0.87    0.46
   5   2   4  717.48   29.45
  -5  -2  -4  727.49   29.98
   5   2   4  685.58   28.88
  -4  -2  -3   -0.17    0.61
   4   2   3    2.08    1.05
   4   2   3   -0.07    0.37
   3   2   2    0.23    0.52
  -3  -2  -2   -0.31    0.52
   3   2   2    0.77    0.79
  -2  -2  -1   -0.19    0.47
   2   2   1   -0.33    0.61
   2   2   1   -0.20    0.58
   1   2   0   16.92    1.78
   1   2   0   15.27    1.65
  -1  -2   0   14.26    1.24
   0   2  -1   -0.05    0.53
  -1   2  -2  534.65   22.03
   2  -2   3   -0.13    0.57
   2  -2   3    0.47    0.71
   3  -2   4  338.25   14.80
   4  -2   5   -0.06    0.79
   5  -2   6  614.98   26.08
   6  -2   7    0.37    1.31
   7  -2   8  584.09   25.65
   8  -2   9   -1.35    1.08
   9  -2  10  106.77    7.45
  10  -2  11    2.58    2.41
  11  -2  12   42.95    5.41
  12  -2  13    5.37    2.51
  13  -2  14   52.90    6.54
  14  -2  15   -0.98    2.17
  15  -2  16   20.69    4.88
  16  -2  17    2.95    2.55
  16   2  16   18.55    4.36
  15   2  15    0.52    2.34
  14   2  14   10.59    3.38
  13   2  13   -1.67    1.81
  12   2  12  148.13   10.00
  11   2  11   -1.18    1.60
  10   2  10  291.71   15.17
   9   2   9    2.97    1.69
   8   2   8    7.57    2.22
  -8  -2  -8    7.44    2.05
   7   2   7    0.67    1.00
   7   2   7    1.24    0.55
  -7  -2  -7    0.28    0.96
   6   2   6 1063.96   42.04
   6   2   6  982.48   41.14
   5   2   5    0.83    0.34
   5   2   5    1.54    1.15
  -5  -2  -5   -0.75    0.79
   4   2   4  521.20   20.68
  -4  -2  -4  478.36   21.68
   4   2   4  513.40   21.50
   3   2   3    0.72    0.37
  -3  -2  -3   -0.36    0.62
   3   2   3    0.34    0.90
  -2  -2  -2 1091.82   43.50
   2   2   2 1026.92   42.36
   2   2   2 1074.52   42.98
  -1  -2  -1    0.23    0.44
   1   2   1   -0.94    0.55
   0   2   0   -2.31    0.96
  -1   2  -1   -0.36    0.50
   2  -2   2 1047.22   41.51
   2  -2   2 1039.02   39.20
   3  -2   3   -0.28    0.77
   4  -2   4  485.65   20.56
   5  -2   5    0.58    1.04
   6  -2   6 1080.60   44.15
   7  -2   7    0.83    1.28
   8  -2   8   10.03    2.63
   9  -2   9    0.91    1.84
  10  -2  10  282.98   14.85
  11  -2  11    1.62    2.53
  12  -2  12  136.08    9.57
  13  -2  13    0.63    2.30
  14  -2  14    5.97    3.24
  15  -2  15   -0.90    2.05
  16  -2  16   30.55    5.82
  16   2  17    5.34    2.62
  15   2  16   19.66    4.49
  14   2  15   -0.71    1.85
  13   2  14   63.78    6.55
  12   2  13   -0.81    1.82
  11   2  12   51.53    5.92
  10   2  11    0.08    1.60
   9   2  10  105.74    7.31
   8   2   9    1.53    1.45
  -8  -2  -9    0.67    0.94
  -7  -2  -8  637.21   27.61
   7   2   8  598.47   26.85
   6   2   7    0.36    1.19
  -6  -2  -7   -0.37    0.94
   5   2   6  626.69   26.80
  -5  -2  -6  637.69   27.30
   4   2   5    0.34    0.91
  -4  -2  -5    0.04    0.91
  -3  -2  -4  317.53   14.80
   3   2   4  349.41   14.75
  -2  -2  -3    0.02    0.72
   2   2   3   -0.48    0.72
  -1  -2  -2  513.63   21.46
   1   2   2  513.05   21.12
   0   2   1    0.60    0.67
  -1   2   0   15.82    1.72
  -2   2  -1    0.32    0.59
   3  -2   2    1.52    0.83
   3  -2   2    0.38    0.78
   4  -2   3    5.92    1.30
   5  -2   4  725.50   29.93
   6  -2   5   -0.50    1.13
   7  -2   6  197.89   10.26
   8  -2   7    0.64    1.57
   9  -2   8   -0.42    1.37
  10  -2   9   -0.97    1.69
  11  -2  10   10.45    3.05
  12  -2  11   -1.97    1.70
  13  -2  12    9.66    3.44
  14  -2  13   -0.86    2.06
  14  -2  13    1.32    1.05
  15  -2  14    2.08    2.82
  15  -2  14    3.00    2.00
  16  -2  15    0.24    1.99
  17  -2  16    2.52    2.53
  15   2  17   -0.50    1.76
  14   2  16   -1.05    1.85
  13   2  15    0.06    2.12
  12   2  14 1025.13   45.14
  11   2  13    2.31    2.17
  10   2  12  457.73   22.18
   9   2  11   -2.08    1.09
  -8  -2 -10  100.08    6.79
  -7  -2  -9   -0.87    0.97
   7   2   9   -0.30    0.99
   6   2   8   56.27    4.51
  -6  -2  -8   55.70    4.46
  -5  -2  -7   -0.33    0.97
   5   2   7    0.82    1.03
   4   2   6 5260.52  199.25
  -4  -2  -6 5009.76  206.06
   3   2   5   -1.55    0.80
  -3  -2  -5   -1.59    0.74
   2   2   4 3388.31  131.60
  -2  -2  -4 3388.05  136.18
  -1  -2  -3    0.88    0.64
   1   2   3   -1.02    0.53
   0  -2  -2    3.72    0.91
   0   2   2    4.37    1.02
  -1   2   1   -0.51    0.48
  -2   2   0    1.06    0.47
   3  -2   1   -0.30    0.53
   3  -2   1    0.06    0.68
   4  -2   2 4132.23  159.94
   5  -2   3   -0.33    0.82
   6  -2   4 2716.81  106.36
   7  -2   5    0.07    1.04
   8  -2   6   16.64    2.83
   9  -2   7   -0.61    1.47
  10  -2   8  171.81    9.98
  11  -2   9    0.28    1.80
  12  -2  10  765.85   34.06
  13  -2  11   -1.08    2.00
  14  -2  12  408.08   20.17
  14  -2  12  389.24   20.57
  15  -2  13   -0.26    0.95
  15  -2  13    3.65    2.86
  16  -2  14  168.10   11.89
  17  -2  15   -2.19    1.65
  15   2  18    2.15    1.70
  14   2  17   -0.90    2.03
  13   2  16   95.90    8.29
  12   2  15   -0.44    1.84
  11   2  14    0.89    1.76
  10   2  13   -0.83    1.45
   9   2  12   -1.11    1.46
  -8  -2 -11    0.91    1.15
   8   2  11   -2.23    0.95
   7   2  10    0.71    1.38
  -7  -2 -10    1.21    1.19
   6   2   9   -0.54    1.13
  -6  -2  -9    1.10    1.40
   5   2   8   12.15    2.45
  -5  -2  -8    9.07    2.12
   4   2   7   -0.09    1.07
  -4  -2  -7    0.15    1.06
   3   2   6  732.90   30.22
  -3  -2  -6  731.36   31.23
  -2  -2  -5   -1.97    0.79
   2   2   5   -1.97    0.73
   1   2   4  130.73    6.55
  -1  -2  -4  134.64    6.72
   0  -2  -3    0.38    0.59
   0   2   3   -0.12    0.43
  -1   2   2   -0.12    0.25
  -2   2   1   -2.67    0.40
  -3   2   0  235.98   10.30
   4  -2   1   -0.26    0.56
   4  -2   1    0.24    0.70
   5  -2   2   14.37    1.86
   6  -2   3    0.61    1.11
   7  -2   4   39.36    3.44
   8  -2   5   -0.85    1.04
   9  -2   6  166.72    9.29
  10  -2   7    1.58    1.57
  11  -2   8   43.26    4.90
  12  -2   9    1.08    1.81
  13  -2  10   15.36    3.82
  14  -2  11    0.58    1.80
  14  -2  11   -0.46    2.12
  15  -2  12   83.56    7.66
  15  -2  12   87.18    7.02
  16  -2  13   -0.55    1.04
  16  -2  13    2.33    2.52
  17  -2  14   30.13    5.59
  18  -2  15    4.72    2.72
  14   2  18   41.98    6.34
  13   2  17   -0.54    1.80
  12   2  16  380.98   20.43
  11   2  15    0.33    1.75
  10   2  14  863.84   38.42
   9   2  13   -2.50    1.36
  -8  -2 -12  829.68   36.59
   8   2  12  807.33   35.73
   7   2  11    0.19    1.28
  -7  -2 -11   -0.04    1.27
   6   2  10   37.24    3.73
  -6  -2 -10   32.14    3.49
   5   2   9    0.87    1.26
  -5  -2  -9   -0.47    0.99
   4   2   8  234.50   11.78
  -4  -2  -8  248.22   12.16
  -3  -2  -7   -0.40    0.95
   3   2   7   -0.48    1.12
  -2  -2  -6 1314.38   52.71
   2   2   6 1233.99   50.76
  -1  -2  -5   -0.02    0.78
  -1  -2  -5    0.21    0.37
   1   2   5   -0.25    0.79
   0  -2  -4  936.08   36.89
   0  -2  -4  888.94   37.70
  -1   2   3   -0.04    0.52
   1  -2  -3    0.03    0.54
  -2   2   2 2750.34  106.68
  -3   2   1    0.34    0.63
   4  -2   0  417.03   17.30
   4  -2   0  419.58   16.36
   5  -2   1    0.21    0.68
   6  -2   2  446.20   18.96
   7  -2   3   -0.10    1.03
   8  -2   4  107.15    6.40
   9  -2   5    0.47    1.35
  10  -2   6  246.87   12.61
  11  -2   7   -1.95    1.14
  12  -2   8  258.61   13.77
  13  -2   9    6.44    2.71
  13  -2   9    5.52    1.91
  14  -2  10   -0.68    1.76
  14  -2  10    2.45    2.49
  15  -2  11   -1.61    1.29
  15  -2  11   -0.19    2.20
  16  -2  12  218.45   13.09
  16  -2  12  221.85   13.80
  17  -2  13    0.40    1.36
  17  -2  13    1.56    2.04
  18  -2  14   18.76    4.62
  14   2  19   -1.64    1.42
  13   2  18  154.22   11.40
  12   2  17    1.33    1.88
  11   2  16  214.66   13.40
  10   2  15    0.76    1.88
   9   2  14   16.49    3.71
   8   2  13    0.91    1.71
  -8  -2 -13    0.04    1.67
  -7  -2 -12  160.57    9.92
   7   2  12  162.33    9.75
   6   2  11   -0.57    1.08
  -6  -2 -11    0.56    1.18
   5   2  10 1126.04   47.31
  -5  -2 -10 1164.48   48.74
   4   2   9   -0.21    1.08
  -4  -2  -9    0.36    1.22
   3   2   8  143.87    7.79
  -3  -2  -8  140.71    8.08
   2   2   7    0.02    1.08
  -2  -2  -7    1.31    1.19
  -1  -2  -6   -2.53    0.99
   1   2   6    0.51    1.10
   0  -2  -5    1.30    0.86
   0  -2  -5    0.32    0.47
   0   2   5    0.04    0.24
  -1   2   4 1048.62   41.31
   1  -2  -4 1067.28   42.26
   1  -2  -4 1014.38   42.95
  -2   2   3   -1.16    0.47
   2  -2  -3    0.10    0.72
  -3   2   2 1501.79   58.74
   5  -2   0  137.46    6.51
   7  -2   2  615.31   25.57
   8  -2   3   -0.10    1.16
   9  -2   4  166.24    8.88
  10  -2   5    0.05    1.54
  11  -2   6   90.12    6.35
  12  -2   7    0.03    1.77
  12  -2   7   -1.55    1.02
  13  -2   8   48.12    5.05
  13  -2   8   52.37    4.96
  14  -2   9   -0.40    2.10
  14  -2   9    0.01    1.87
  15  -2  10   73.05    6.41
  15  -2  10   79.12    6.97
  16  -2  11   -0.49    2.05
  16  -2  11   -0.74    1.57
  17  -2  12  164.19   11.62
  17  -2  12  175.58   11.39
  18  -2  13    4.37    2.66
  19  -2  14   -1.33    2.18
  13   2  19    2.64    2.10
  12   2  18   66.25    6.97
  11   2  17    0.62    1.88
  10   2  16  289.58   16.37
   9   2  15   -0.16    1.77
   8   2  14  184.48   11.32
  -8  -2 -14  187.35   11.50
   7   2  13    3.30    1.85
  -7  -2 -13   -0.88    1.44
  -6  -2 -12   -0.45    1.19
   6   2  12   -0.75    1.39
   5   2  11    0.56    1.08
  -5  -2 -11    0.30    1.20
   4   2  10   17.60    2.97
  -4  -2 -10   18.18    2.99
   3   2   9    0.47    0.98
  -3  -2  -9   -1.32    1.06
   2   2   8 2528.22   93.25
  -2  -2  -8 2205.54   96.45
  -1  -2  -7    0.65    1.11
   1   2   7   -0.46    0.80
   0  -2  -6 1825.47   75.44
   0  -2  -6 1873.81   74.14
   1  -2  -5    1.01    0.80
  -1   2   5   -0.28    0.48
   1  -2  -5    0.19    0.64
  -2   2   4   71.40    3.87
   2  -2  -4   74.78    4.00
   3  -2  -3   -0.97    0.73
  -3   2   3   -0.90    0.38
  -4   2   2  247.12   10.38
   4  -2  -2  239.39   11.10
   5  -2  -1    2.97    1.22
   5  -2  -1   -0.07    0.51
   5  -2  -1   -0.26    0.59
   6  -2   0 2972.98  115.34
   7  -2   1    1.42    0.94
   8  -2   2 1744.62   69.02
   9  -2   3    0.61    1.23
  10  -2   4 1852.10   73.60
  10  -2   4 1839.52   76.08
  11  -2   5    0.31    1.16
  11  -2   5    1.10    1.71
  12  -2   6   85.47    6.22
  12  -2   6   87.67    6.38
  13  -2   7    1.48    1.83
  13  -2   7    0.30    1.38
  14  -2   8  777.78   34.43
  14  -2   8  779.15   34.97
  15  -2   9   -0.81    2.06
  15  -2   9    3.47    2.44
  16  -2  10  289.59   16.20
  16  -2  10  291.06   16.01
  17  -2  11   -0.49    2.31
  17  -2  11    0.90    1.85
  18  -2  12  235.39   14.58
  18  -2  12  227.90   14.16
  19  -2  13   -1.27    1.88
  12   2  19    0.01    1.88
  11   2  18    4.94    2.59
  10   2  17    2.06    2.19
   9   2  16   39.72    5.34
  -8  -2 -15   -0.06    1.74
   8   2  15    1.07    1.56
   8   2  15    0.99    1.57
   7   2  14   79.03    6.62
  -7  -2 -14   84.14    6.95
  -6  -2 -13    0.31    1.43
   6   2  13    0.95    1.43
  -5  -2 -12   47.76    4.51
   5   2  12   41.98    4.25
   4   2  11    0.18    1.28
  -4  -2 -11    0.09    0.99
   3   2  10   83.38    5.76
  -3  -2 -10   91.85    6.18
  -2  -2  -9    0.49    1.25
   2   2   9   -0.57    0.92
   1   2   8   33.43    2.84
   0   2   7   -0.88    0.64
   0  -2  -7   -0.51    0.44
   0  -2  -7   -0.24    0.90
   1  -2  -6   76.93    4.79
  -1   2   6   79.13    4.40
   1  -2  -6   80.30    4.10
   2  -2  -5    0.25    0.77
  -2   2   5   -0.79    0.34
   2  -2  -5   -0.78    0.67
  -3   2   4  557.25   22.77
   3  -2  -4  575.56   23.83
   4  -2  -3   -0.37    0.97
  -4   2   3   -0.75    0.37
   5  -2  -2   35.08    2.09
   5  -2  -2   34.78    2.20
   5  -2  -2   30.58    2.72
   6  -2  -1  186.99    9.25
   7  -2   0   70.08    4.08
   7  -2   0   68.07    4.66
   8  -2   1   33.55    3.28
   9  -2   2   24.14    3.11
   9  -2   2   25.16    2.69
  10  -2   3    0.08    1.40
  10  -2   3    5.16    1.68
  11  -2   4    6.12    2.02
  11  -2   4    5.43    2.02
  12  -2   5    4.77    1.77
  12  -2   5    0.26    1.56
  13  -2   6    5.62    2.29
  13  -2   6    7.51    2.55
  14  -2   7    0.88    1.60
  14  -2   7    2.18    1.87
  15  -2   8  146.50    9.62
  15  -2   8  136.40    9.35
  16  -2   9   -2.29    1.65
  16  -2   9    2.94    2.11
  17  -2  10   26.91    4.60
  17  -2  10   24.95    4.81
  18  -2  11    0.00    2.17
  18  -2  11   -0.31    2.16
  19  -2  12    0.66    3.15
  12   2  20   62.46    7.61
  11   2  19   -1.12    1.73
  10   2  18   54.71    6.72
   9   2  17   -1.21    1.56
  -8  -2 -16  719.44   33.09
   8   2  16  683.89   32.11
  -7  -2 -15   -1.26    1.48
   7   2  15    0.59    1.69
   6   2  14   87.15    6.67
  -6  -2 -14   81.78    6.76
   5   2  13    0.54    1.33
  -5  -2 -13    1.10    1.41
   4   2  12   45.63    4.17
  -4  -2 -12   47.34    4.47
   4   2  12   45.78    4.17
  -3  -2 -11    0.99    1.14
   3   2  11   -1.08    0.82
   2   2  10    1.75    1.47
  -2  -2 -10    5.05    1.87
  -1  -2  -9   -1.36    0.99
  -1  -2  -9    0.57    0.45
   1   2   9   -0.08    0.39
   0   2   8 2212.18   84.56
   0  -2  -8 2115.35   87.78
   0  -2  -8 2121.16   86.01
  -1   2   7   -0.15    0.72
   1  -2  -7   -0.79    0.62
   1  -2  -7   -0.07    0.88
   2  -2  -6  386.51   17.82
  -2   2   6  443.34   17.45
   2  -2  -6  430.12   18.60
  -3   2   5    0.92    0.53
  -4   2   4  306.74   12.85
   4  -2  -4  317.39   13.92
  -5   2   3    0.33    0.39
   5  -2  -3    0.71    0.99
   6  -2  -2  310.25   14.30
   6  -2  -2  313.82   12.98
   7  -2  -1    1.80    0.85
   7  -2  -1    1.64    1.26
   8  -2   0 1410.95   55.65
   8  -2   0 1404.05   58.15
   9  -2   1    2.05    1.29
   9  -2   1    6.44    1.95
  10  -2   2 1820.02   75.41
  10  -2   2 1841.81   72.57
  11  -2   3   -0.42    1.21
  11  -2   3   -0.80    1.28
  12  -2   4   72.22    5.56
  12  -2   4   87.94    6.17
  13  -2   5   -0.95    1.08
  13  -2   5   -0.06    1.23
  14  -2   6  465.39   22.41
  14  -2   6  464.91   21.77
  15  -2   7    2.07    2.22
  15  -2   7   -0.80    1.79
  16  -2   8  229.49   13.27
  16  -2   8  226.40   13.26
  17  -2   9   -1.68    1.69
  17  -2   9   -2.89    1.81
  18  -2  10  135.54   10.20
  18  -2  10  150.99   10.51
  19  -2  11   -0.07    2.30
  19  -2  11    2.87    2.47
  20  -2  12   45.55    6.67
  11   2  20   66.13    7.76
  10   2  19    2.04    2.04
   9   2  18   49.56    6.28
  -8  -2 -17    1.41    2.10
   8   2  17   -2.02    1.35
   7   2  16  146.06   10.08
  -7  -2 -16  165.74   10.82
  -6  -2 -15   -0.91    1.52
   6   2  15    0.45    1.62
   5   2  14   79.95    6.36
  -5  -2 -14   91.07    6.92
   4   2  13   -1.43    0.99
  -4  -2 -13    0.72    1.05
  -3  -2 -12  249.78   13.69
   3   2  12  271.82   13.42
   3   2  12  271.42   13.42
   2   2  11   -0.68    1.00
  -2  -2 -11   -0.07    1.01
  -1  -2 -10  117.85    7.17
  -1  -2 -10  115.02    5.28
   0   2   9   -1.07    0.77
   0  -2  -9    0.59    0.69
   0  -2  -9   -0.05    1.05
  -1   2   8  104.88    5.58
   1  -2  -8  100.81    6.13
   1  -2  -8   98.44    5.09
  -2   2   7   -1.11    0.52
   2  -2  -7   -0.88    0.81
   2  -2  -7   -1.27    0.90
   3  -2  -6 1438.54   56.77
  -3   2   6 1362.12   54.55
   3  -2  -6 1381.38   57.33
   4  -2  -5   -2.15    0.74
  -4   2   5   -0.43    0.32
   5  -2  -4  550.29   23.34
  -5   2   4  536.58   21.66
   6  -2  -3    1.18    0.53
   6  -2  -3    1.80    1.17
   6  -2  -3    0.93    0.45
   7  -2  -2   16.09    1.52
   7  -2  -2   15.28    2.35
   9  -2   0  259.61   11.58
   9  -2   0  253.56   12.77
  10  -2   1    3.92    1.69
  10  -2   1    1.12    1.30
  11  -2   2 1124.94   45.70
  11  -2   2 1127.64   47.85
  12  -2   3    2.88    1.74
  12  -2   3    0.93    1.38
  13  -2   4   76.40    6.07
  13  -2   4   79.17    5.77
  14  -2   5   -1.97    1.35
  14  -2   5    0.20    1.47
  15  -2   6   27.82    4.34
  15  -2   6   28.96    4.26
  16  -2   7    1.39    1.99
  16  -2   7    0.76    2.02
  17  -2   8  146.98   10.16
  17  -2   8  153.28   10.22
  18  -2   9    2.23    2.03
  18  -2   9   -0.72    1.94
  19  -2  10  126.28    9.91
  19  -2  10  135.96    9.87
  20  -2  11   -0.03    2.03
  20  -2  11    1.75    2.45
  11   2  21   -0.46    1.39
  10   2  20    2.62    2.16
   9   2  19    2.62    1.91
  -8  -2 -18   80.85    7.35
   8   2  18   75.22    7.04
  -7  -2 -17    0.33    2.19
   7   2  17   -2.40    1.87
  -6  -2 -16  332.46   17.82
   6   2  16  329.80   17.38
  -5  -2 -15   -0.44    1.84
   5   2  15   -0.63    1.53
   4   2  14   54.98    4.94
  -4  -2 -14   50.87    4.94
   3   2  13    0.17    1.12
  -3  -2 -13   -0.41    1.34
   2   2  12   79.35    5.63
  -2  -2 -12   79.02    5.90
   1   2  11    0.66    0.51
  -1  -2 -11    1.68    1.43
   0  -2 -10 1030.68   42.26
   0  -2 -10 1002.22   44.21
   0   2  10 1088.98   42.51
   1  -2  -9    0.01    0.69
  -1   2   9    0.49    0.96
   1  -2  -9   -0.83    0.98
  -2   2   8   55.31    3.47
   2  -2  -8   47.90    3.35
   2  -2  -8   59.83    4.15
  -3   2   7    0.05    0.57
   3  -2  -7    0.25    0.95
   3  -2  -7    0.70    0.94
  -4   2   6    7.31    0.99
   4  -2  -6    7.35    1.61
  -5   2   5   -0.36    0.31
   5  -2  -5   -0.35    0.97
   6  -2  -4   22.39    2.58
   6  -2  -4   17.91    1.27
   6  -2  -4   17.96    1.33
   7  -2  -3    0.56    0.47
   7  -2  -3   -0.52    1.01
   8  -2  -2 6283.38  243.99
   8  -2  -2 6383.23  253.24
   9  -2  -1    0.66    0.87
   9  -2  -1   -0.99    1.34
  10  -2   0  117.61    7.22
  10  -2   0  115.35    6.20
  11  -2   1    5.32    1.82
  11  -2   1    2.83    1.48
  12  -2   2   57.98    4.92
  12  -2   2   58.82    4.49
  13  -2   3   -0.25    1.59
  13  -2   3    1.37    1.45
  14  -2   4  299.61   15.80
  14  -2   4  308.17   15.03
  15  -2   5   -0.03    1.64
  15  -2   5   -0.70    1.65
  16  -2   6  936.10   42.45
  16  -2   6  969.17   41.05
  17  -2   7    1.08    2.04
  17  -2   7   -0.82    1.87
  18  -2   8    0.26    1.94
  18  -2   8    0.86    2.02
  19  -2   9   -1.25    1.91
  19  -2   9   -1.03    2.04
  20  -2  10  173.15   11.84
  20  -2  10  178.80   12.22
  10   2  21    1.69    1.87
   9   2  20   39.72    5.90
   8   2  19    2.59    2.19
  -8  -2 -19   -2.10    1.51
   8   2  19    2.54    2.19
   7   2  18   95.59    7.78
  -7  -2 -18   88.49    8.11
  -6  -2 -17    0.76    1.89
   6   2  17    0.29    1.67
  -5  -2 -16  148.06   10.13
   5   2  16  163.56   10.26
   4   2  15   -1.23    1.22
  -4  -2 -15   -0.98    1.54
  -3  -2 -14    0.89    1.38
   3   2  14    1.67    1.54
  -2  -2 -13   -1.41    1.20
   2   2  13    0.06    1.13
   1   2  12    0.90    0.60
   0   2  11    1.39    1.01
   0  -2 -11   -0.01    0.75
   0  -2 -11    0.04    1.15
   1  -2 -10   10.78    1.59
   1  -2 -10   13.43    2.53
  -1   2  10    9.54    1.87
   2  -2  -9   -1.00    0.86
  -2   2   9    1.13    0.80
   3  -2  -8   27.09    2.71
  -3   2   8   34.06    2.45
   3  -2  -8   37.72    3.19
   4  -2  -7   -2.03    0.94
  -4   2   7    0.51    0.47
   4  -2  -7   -1.05    0.63
   5  -2  -6 1187.65   50.30
  -5   2   6 1247.84   47.64
   6  -2  -5   -2.61    0.90
  -6   2   5   -0.06    0.21
   7  -2  -4  472.30   18.94
   7  -2  -4  478.44   21.12
   8  -2  -3    1.04    1.48
   9  -2  -2   30.68    3.46
   9  -2  -2   28.87    2.29
  10  -2  -1    0.48    1.41
  11  -2   0  100.87    5.81
  11  -2   0  106.37    6.88
  12  -2   1    3.16    1.34
  12  -2   1    0.91    1.37
  13  -2   2   38.50    4.08
  13  -2   2   32.05    3.44
  14  -2   3    3.78    1.82
  14  -2   3    1.54    1.72
  15  -2   4  238.65   13.57
  15  -2   4  248.55   12.81
  16  -2   5    0.99    2.01
  16  -2   5   -0.01    1.87
  17  -2   6    4.16    2.54
  17  -2   6    8.09    2.86
  18  -2   7    2.76    2.10
  18  -2   7    3.19    2.08
  19  -2   8   21.42    4.47
  19  -2   8   16.96    4.09
  20  -2   9   -1.00    1.86
  21  -2  10    2.43    2.44
   9   2  21    1.15    1.89
   8   2  20    7.35    2.86
  -8  -2 -20    5.72    2.73
  -7  -2 -19   -1.15    2.16
   7   2  19    0.90    2.01
   6   2  18  816.95   36.40
  -6  -2 -18  787.95   37.38
   5   2  17    1.38    1.90
  -5  -2 -17   -1.69    1.37
  -4  -2 -16   23.20    4.16
   4   2  16   31.78    4.67
  -3  -2 -15    1.29    1.61
   3   2  15    0.15    1.07
   2   2  14    5.77    1.76
  -2  -2 -14   -0.31    1.19
  -1  -2 -13   -0.44    1.03
   1   2  13    0.37    0.60
   0  -2 -12   45.72    4.11
   0   2  12   43.72    3.83
   1  -2 -11    0.39    1.13
  -1   2  11   -0.59    0.80
   1  -2 -11   -0.39    0.87
  -2   2  10 4213.12  159.07
   2  -2 -10 4016.20  163.69
   2  -2 -10 4054.67  165.51
  -3   2   9    2.55    0.91
   4  -2  -8  914.25   38.00
  -4   2   8  877.60   35.96
   4  -2  -8  932.36   38.59
   5  -2  -7    1.48    1.40
  -5   2   7    0.37    0.34
   6  -2  -6  275.90   13.88
  -6   2   6  311.45   12.05
   7  -2  -5    1.23    1.37
   8  -2  -4  350.45   16.39
   8  -2  -4  350.72   14.21
   9  -2  -3    0.61    1.46
   9  -2  -3   -0.53    0.54
  10  -2  -2 2068.65   84.90
  11  -2  -1    0.59    1.40
  11  -2  -1    0.50    1.17
  12  -2   0   70.80    4.52
  12  -2   0   61.00    5.13
  13  -2   1    2.97    1.62
  13  -2   1    4.62    1.85
  14  -2   2 1009.86   43.76
  14  -2   2  997.82   41.44
  15  -2   3    0.99    1.71
  15  -2   3    0.55    1.78
  16  -2   4  104.52    7.80
  16  -2   4  102.46    7.14
  17  -2   5    1.41    1.83
  17  -2   5    1.22    2.05
  18  -2   6  181.44   11.83
  18  -2   6  196.58   11.65
  19  -2   7    0.11    2.12
  20  -2   8   53.63    6.63
  21  -2   9    1.88    2.39
   9   2  22   28.08    5.36
  -8  -2 -21   -1.37    1.67
   8   2  21   -0.51    1.75
  -7  -2 -20   23.57    4.81
   7   2  20   24.43    4.82
  -6  -2 -19    0.22    1.86
   6   2  19    1.57    2.07
  -5  -2 -18   54.75    5.81
   5   2  18   53.51    6.09
  -4  -2 -17   -1.23    1.30
   4   2  17    1.20    1.71
  -3  -2 -16  153.45    9.95
   3   2  16  155.91    9.80
   2   2  15   -0.06    1.32
  -2  -2 -15    0.07    1.64
  -1  -2 -14   17.10    3.23
   1   2  14    8.21    1.86
   0  -2 -13   -0.60    1.12
   0   2  13    1.70    1.32
   1  -2 -12  395.02   17.06
   1  -2 -12  377.02   18.69
  -1   2  12  397.97   17.68
  -2   2  11    0.40    0.81
   2  -2 -11    0.72    1.03
   2  -2 -11   -2.06    1.00
  -3   2  10  113.18    6.15
   3  -2 -10  118.27    6.41
   3  -2 -10  116.83    7.15
   4  -2  -9    0.22    0.98
  -4   2   9    0.02    0.44
   4  -2  -9   -1.02    1.18
  -5   2   8  795.89   31.51
   5  -2  -8  795.85   34.12
  -6   2   7    0.25    0.26
   6  -2  -7   -0.17    1.08
   7  -2  -6  877.31   37.34
   8  -2  -5   -0.03    1.44
   9  -2  -4    6.95    2.13
  10  -2  -3    1.47    0.83
  10  -2  -3   -0.45    1.52
  11  -2  -2  219.35    9.69
  11  -2  -2  209.81   11.47
  12  -2  -1    2.46    1.41
  12  -2  -1    1.79    1.56
  13  -2   0  804.24   32.95
  13  -2   0  795.71   35.35
  15  -2   2  315.82   15.30
  15  -2   2  325.03   16.75
  16  -2   3    3.68    2.20
  17  -2   4   73.18    6.46
  18  -2   5    1.86    2.11
  19  -2   6  127.17    9.52
  20  -2   7    0.08    1.96
  21  -2   8   80.53    7.60
  22  -2   9    4.19    2.62
   8   2  22   25.83    5.03
  -7  -2 -21    1.53    1.97
   7   2  21    0.65    1.96
   6   2  20   31.47    5.08
  -6  -2 -20   28.35    5.26
   5   2  19    2.60    1.85
  -5  -2 -19   -0.83    1.90
   4   2  18   91.33    7.47
  -4  -2 -18  105.53    8.04
   3   2  17    0.39    1.66
  -3  -2 -17   -1.44    1.20
  -2  -2 -16    8.55    2.48
   2   2  16    2.94    1.63
  -1  -2 -15   -0.01    1.54
   1   2  15    0.64    0.89
   0  -2 -14   71.62    5.96
   0   2  14   82.17    5.73
   1  -2 -13    0.64    1.32
  -1   2  13    2.38    1.33
   2  -2 -12  314.32   14.06
   2  -2 -12  298.19   15.33
  -2   2  12  314.30   14.35
   3  -2 -11    0.18    1.01
  -3   2  11    0.32    0.84
   3  -2 -11   -0.83    1.13
   4  -2 -10 1102.30   46.40
   4  -2 -10 1132.23   45.67
  -4   2  10 1055.55   43.51
  -5   2   9    0.62    0.55
   5  -2  -9    0.67    1.03
   5  -2  -9   -0.53    1.16
  -6   2   8  512.89   20.43
   7  -2  -7    0.90    1.53
   8  -2  -6  252.91   12.80
   9  -2  -5    1.23    1.62
  10  -2  -4  182.98   10.13
  11  -2  -3    1.31    1.56
  12  -2  -2  191.99   10.82
  13  -2  -1   18.87    3.22
  14  -2   0   92.69    6.89
  15  -2   1   10.64    2.80
  16  -2   2  190.62   11.61
  17  -2   3    1.47    1.89
  18  -2   4   47.51    5.86
  19  -2   5   -1.51    2.13
  20  -2   6   64.63    6.61
  21  -2   7   -2.06    1.82
  22  -2   8   78.13    7.69
   7   2  22   67.32    6.97
  -7  -2 -22   71.44    7.13
   6   2  21   -0.70    1.63
  -6  -2 -21    0.06    2.06
  -5  -2 -20   15.62    4.09
   5   2  20   25.46    4.72
   4   2  19    2.38    2.10
  -4  -2 -19    0.54    2.12
   3   2  18    2.22    2.06
  -3  -2 -18   -0.88    1.66
   2   2  17   -1.20    0.98
  -2  -2 -17   -1.08    1.12
   1   2  16  112.57    7.62
  -1  -2 -16  116.34    8.30
   0   2  15   -0.61    0.94
   0  -2 -15    1.10    1.68
   1  -2 -14  418.33   20.90
  -1   2  14  457.78   20.02
  -2   2  13    1.06    0.88
   2  -2 -13    0.93    1.35
   3  -2 -12  117.86    7.61
   3  -2 -12  122.26    6.98
  -3   2  12  129.34    6.83
   4  -2 -11   -0.72    0.85
   4  -2 -11   -1.45    1.21
  -4   2  11    0.65    0.85
  -5   2  10   15.61    1.59
   5  -2 -10   15.02    2.55
  -6   2   9    0.11    0.35
   6  -2  -9   -1.22    1.34
   6  -2  -9    0.16    1.03
   7  -2  -8   13.16    2.60
   8  -2  -7   -0.25    1.58
   9  -2  -6    9.36    2.63
  10  -2  -5   -0.09    1.61
  11  -2  -4  385.57   18.54
  12  -2  -3    2.42    2.00
  13  -2  -2    4.12    2.20
  14  -2  -1    4.80    2.03
  15  -2   0   27.63    4.20
  16  -2   1    3.95    2.36
  17  -2   2   39.29    5.27
  18  -2   3   -2.17    1.54
  19  -2   4    0.19    2.21
  20  -2   5    2.22    2.38
  21  -2   6   97.35    8.37
  22  -2   7    2.51    2.53
   6   2  22  114.59    9.23
  -6  -2 -22  112.12    9.54
   5   2  21    1.35    1.94
  -5  -2 -21   -0.49    1.95
   4   2  20  981.22   42.99
  -4  -2 -20  960.67   44.37
  -3  -2 -19    1.28    2.11
   3   2  19    1.88    1.66
   2   2  18   99.36    7.40
  -1  -2 -17    0.61    1.38
   1   2  17    2.04    1.30
   0  -2 -16   -1.45    1.59
   0   2  16    7.06    2.19
  -1   2  15    1.05    1.17
   1  -2 -15    0.29    1.41
   2  -2 -14  693.76   31.87
  -2   2  14  719.20   30.12
  -3   2  13    1.10    1.07
   3  -2 -13    5.89    1.81
   3  -2 -13    1.85    1.44
   4  -2 -12 1832.90   77.71
  -4   2  12 1869.38   73.87
   4  -2 -12 1913.33   76.58
   5  -2 -11    0.36    1.31
   5  -2 -11   -0.13    0.65
  -5   2  11    0.88    0.72
   6  -2 -10    5.83    1.88
   6  -2 -10    3.83    1.36
   7  -2  -9   -2.12    1.28
   8  -2  -8 2067.06   85.08
   9  -2  -7   -1.05    1.55
  10  -2  -6 1108.76   47.41
  11  -2  -5   -1.76    1.54
  12  -2  -4 3104.44  126.64
  13  -2  -3    1.21    1.95
  14  -2  -2    6.84    2.44
  15  -2  -1   -0.69    1.54
  16  -2   0  346.37   18.04
  17  -2   1    0.78    1.66
  18  -2   2  174.42   11.34
  19  -2   3   -2.36    2.01
  20  -2   4  143.32   10.42
  21  -2   5   -0.16    2.31
  22  -2   6   15.53    4.36
  -6  -2 -23    1.54    1.92
   6   2  23   -0.35    1.66
   5   2  22    5.02    2.13
  -5  -2 -22    1.58    2.22
   5   2  22    4.91    2.11
  -4  -2 -21    0.13    2.19
   4   2  21    2.08    1.94
  -3  -2 -20    4.80    2.81
   3   2  20    6.04    2.45
   2   2  19   -1.01    0.92
  -2  -2 -19    0.83    2.05
  -1  -2 -18   18.34    3.85
   1   2  18    8.90    2.84
   0  -2 -17    0.29    1.62
   0   2  17    0.23    1.31
  -1   2  16  422.88   19.40
   1  -2 -16  405.62   20.70
  -2   2  15    0.64    1.42
   2  -2 -15    0.39    1.57
  -3   2  14   60.52    4.46
   3  -2 -14   60.66    5.21
  -4   2  13    0.67    0.78
   4  -2 -13    0.35    1.20
   4  -2 -13   -0.23    1.47
   5  -2 -12  124.81    7.29
   5  -2 -12  120.61    7.74
   6  -2 -11    0.20    0.87
   6  -2 -11   -0.29    1.20
   7  -2 -10   28.37    3.07
   7  -2 -10   25.30    3.52
   8  -2  -9    0.95    1.99
   9  -2  -8   79.49    6.16
  10  -2  -7    1.04    1.88
  11  -2  -6  724.89   32.34
  12  -2  -5    8.55    2.86
  13  -2  -4   16.21    3.36
  14  -2  -3    0.60    1.82
  15  -2  -2  187.75   11.35
  16  -2  -1   10.29    3.20
  17  -2   0    8.60    3.04
  18  -2   1    0.01    1.99
  19  -2   2    5.50    2.86
  20  -2   3    1.82    2.26
  21  -2   4    0.81    2.03
  22  -2   5    2.18    2.53
  23  -2   6   22.52    5.00
  -5  -2 -23    3.39    2.02
   5   2  23    1.20    1.91
  -4  -2 -22    9.60    3.36
   4   2  22   12.21    3.78
   3   2  21   -1.14    1.51
  -3  -2 -21    4.59    2.43
  -1  -2 -19   -1.32    1.36
   1   2  19   -0.64    1.52
   0   2  18   81.67    6.24
   0  -2 -18   72.20    6.55
  -1   2  17   -1.43    1.12
   1  -2 -17    0.42    1.51
   2  -2 -16  334.55   17.73
  -2   2  16  361.47   16.67
   3  -2 -15   -1.69    1.56
  -3   2  15   -0.20    0.97
   4  -2 -14    8.48    2.45
   5  -2 -13    0.90    1.09
   5  -2 -13   -1.08    1.43
   6  -2 -12 1424.33   59.01
   6  -2 -12 1402.57   59.60
   7  -2 -11    0.97    1.22
   7  -2 -11    0.34    1.70
   8  -2 -10   12.50    3.00
   8  -2 -10   13.10    2.44
   9  -2  -9    0.85    2.08
  10  -2  -8  144.95    9.13
  12  -2  -6   30.81    4.37
  13  -2  -5   -0.12    2.03
  14  -2  -4  439.56   21.64
  15  -2  -3    6.03    2.64
  16  -2  -2  250.64   14.23
  17  -2  -1    0.55    1.74
  18  -2   0    6.11    2.74
  19  -2   1    2.88    2.40
  20  -2   2  173.52   11.87
  21  -2   3   -1.91    1.95
  22  -2   4  102.81    8.96
  23  -2   5    0.39    2.49
  -4  -2 -23   -0.26    2.10
   4   2  23    0.99    1.89
  -3  -2 -22   -1.47    2.19
   3   2  22    4.24    2.33
  -2  -2 -21   -0.79    1.82
   2   2  21   -0.14    0.86
  -1  -2 -20    4.44    2.60
   1   2  20    6.87    2.53
   0  -2 -19    2.25    1.99
   0   2  19    0.02    1.55
   1  -2 -18   66.16    6.13
   2  -2 -17    1.13    1.54
   3  -2 -16    4.12    2.20
   4  -2 -15   -0.98    1.55
   5  -2 -14   27.86    3.61
   5  -2 -14   26.37    4.08
   6  -2 -13    1.98    2.03
   6  -2 -13    1.68    1.21
   7  -2 -12  116.29    7.54
   8  -2 -11   -0.54    1.72
   8  -2 -11   -1.47    1.03
   9  -2 -10   15.05    3.21
  10  -2  -9   -0.36    1.78
  11  -2  -8    2.40    2.16
  12  -2  -7    0.30    1.92
  13  -2  -6  111.39    7.98
  14  -2  -5    5.49    2.50
  15  -2  -4   33.59    5.14
  16  -2  -3    6.76    2.94
  17  -2  -2   15.38    3.76
  18  -2  -1    0.03    2.00
  19  -2   0   23.46    4.76
  20  -2   1   -1.09    1.92
  21  -2   2    5.74    3.12
  22  -2   3   -1.26    2.52
  23  -2   4  103.62    9.34
  -3  -2 -23    0.24    1.86
  -2  -2 -22  407.10   21.91
  -1  -2 -21   -0.14    1.66
   0  -2 -20    2.18    2.30
   1  -2 -19    0.12    1.75
   2  -2 -18   17.50    3.78
   3  -2 -17    1.50    1.59
   4  -2 -16  144.68    9.61
   5  -2 -15    0.57    1.88
   6  -2 -14 3297.60  133.33
   6  -2 -14 3271.91  134.59
   7  -2 -13    0.87    1.21
   7  -2 -13    1.09    1.74
   8  -2 -12   -0.18    0.92
   8  -2 -12    2.99    1.99
   9  -2 -11    0.07    1.49
   9  -2 -11   -1.49    0.72
  10  -2 -10   72.01    6.11
  11  -2  -9   -0.49    2.23
  12  -2  -8  484.33   23.45
  13  -2  -7   -2.43    1.89
  14  -2  -6 1317.26   56.92
  15  -2  -5    2.03    2.38
  16  -2  -4   41.88    5.65
  17  -2  -3    1.99    2.31
  18  -2  -2  410.28   21.53
  19  -2  -1    2.50    2.71
  20  -2   0  252.11   15.41
  21  -2   1    0.86    2.36
  22  -2   2  477.38   25.40
  23  -2   3   -0.72    2.51
  -2  -2 -23   -2.57    1.51
  -1  -2 -22    4.16    2.81
   0  -2 -21    2.41    2.22
   1  -2 -20    9.48    3.16
   2  -2 -19    0.55    1.67
   3  -2 -18    0.41    1.66
   4  -2 -17   -1.75    1.06
   5  -2 -16   27.70    4.34
   6  -2 -15    0.56    1.75
   6  -2 -15   -0.23    1.88
   7  -2 -14  197.07   11.54
   7  -2 -14  202.74   11.28
   8  -2 -13    0.40    1.25
   8  -2 -13    3.42    1.81
   9  -2 -12    9.49    2.53
   9  -2 -12    4.83    1.95
  10  -2 -11    0.83    2.00
  11  -2 -10    8.94    2.94
  12  -2  -9    0.90    2.17
  13  -2  -8   53.30    6.14
  14  -2  -7    3.70    2.84
  15  -2  -6   52.16    6.27
  16  -2  -5    1.62    2.42
  17  -2  -4   48.25    6.15
  18  -2  -3    4.95    2.46
  19  -2  -2    0.93    2.72
  20  -2  -1   -0.84    2.50
  21  -2   0    8.81    3.64
  22  -2   1   -5.21    2.17
  23  -2   2   75.93    7.85
  -2  -2 -24   88.96    8.06
  -1  -2 -23    0.45    1.78
   0  -2 -22  389.60   21.08
   1  -2 -21    0.58    1.97
   2  -2 -20    7.62    3.02
   3  -2 -19    0.70    1.68
   4  -2 -18   20.38    3.98
   5  -2 -17    0.81    1.67
   6  -2 -16    9.80    2.95
   7  -2 -15    0.20    1.59
   7  -2 -15    0.46    1.72
   8  -2 -14  227.85   12.58
   8  -2 -14  232.33   12.88
   9  -2 -13    0.91    1.41
   9  -2 -13   -0.21    1.73
  10  -2 -12   54.98    5.06
  10  -2 -12   68.89    5.91
  11  -2 -11   -1.36    1.42
  12  -2 -10   40.51    5.23
  13  -2  -9    1.09    2.83
  14  -2  -8   39.50    5.68
  15  -2  -7    1.36    2.57
  16  -2  -6  678.84   32.15
  17  -2  -5    0.75    2.60
  18  -2  -4   12.77    3.91
  19  -2  -3   -1.52    1.89
  20  -2  -2   53.60    6.83
  21  -2  -1    1.56    2.52
  22  -2   0    0.35    2.60
  23  -2   1   -0.48    2.53
  24  -2   2  112.19    9.59
  -1  -2 -24    2.26    2.04
   0  -2 -23    1.58    2.01
   1  -2 -22   57.13    6.92
   2  -2 -21   -1.48    1.82
   3  -2 -20   90.13    7.78
   4  -2 -19    0.03    1.51
   5  -2 -18   37.44    5.13
   6  -2 -17    1.00    1.67
   7  -2 -16   91.11    7.25
   8  -2 -15    1.73    1.79
   8  -2 -15    1.23    1.85
   9  -2 -14  362.11   18.61
   9  -2 -14  374.60   18.61
  10  -2 -13    0.39    1.39
  10  -2 -13   -1.06    1.37
  11  -2 -12   41.62    4.32
  11  -2 -12   45.33    5.37
  12  -2 -11   -3.31    2.03
  13  -2 -10   17.01    4.13
  14  -2  -9    1.92    2.71
  15  -2  -8   87.52    7.72
  16  -2  -7   -0.94    2.48
  17  -2  -6  409.94   21.61
  18  -2  -5    1.34    2.82
  19  -2  -4  114.06    9.35
  20  -2  -3   -1.44    2.35
  21  -2  -2    0.88    2.56
  22  -2  -1   -0.49    2.53
  23  -2   0    5.20    3.40
  24  -2   1   -0.52    2.13
   0  -2 -24   34.72    5.74
   1  -2 -23    1.03    1.99
   2  -2 -22   45.39    6.20
   3  -2 -21   -1.31    1.94
   4  -2 -20    4.28    2.67
   5  -2 -19    1.38    1.86
   6  -2 -18  420.99   21.66
   7  -2 -17    0.39    1.60
   8  -2 -16   94.54    7.16
   8  -2 -16   87.48    7.08
   9  -2 -15    0.14    1.49
   9  -2 -15   -1.65    1.56
  10  -2 -14   32.66    4.78
  10  -2 -14   37.14    4.66
  11  -2 -13   -0.73    1.73
  11  -2 -13   -0.89    1.27
  12  -2 -12    5.19    2.97
  13  -2 -11   -1.80    2.20
  14  -2 -10  115.17    8.92
  15  -2  -9   -2.36    2.13
  16  -2  -8  262.30   15.54
  17  -2  -7   -1.85    2.20
  18  -2  -6   41.84    6.38
  19  -2  -5    0.84    2.76
  20  -2  -4  200.27   13.45
  21  -2  -3    3.79    3.05
  22  -2  -2   95.33    9.00
  23  -2  -1   -0.39    2.20
  24  -2   0  162.36   12.39
   1  -2 -24    3.15    2.22
   2  -2 -23   -0.56    1.77
   3  -2 -22   19.81    4.56
   4  -2 -21    1.50    2.05
   5  -2 -20  110.91    8.61
   6  -2 -19   -0.10    1.92
   7  -2 -18    5.35    2.61
   8  -2 -17    0.00    1.81
   9  -2 -16   42.25    5.18
   9  -2 -16   32.34    4.92
  10  -2 -15   -1.63    1.08
  10  -2 -15   -0.33    2.14
  11  -2 -14   11.98    3.50
  11  -2 -14   18.18    3.58
  12  -2 -13   -0.58    1.30
  12  -2 -13   -1.70    2.35
  13  -2 -12  120.20    9.12
  14  -2 -11   -2.49    2.04
  15  -2 -10   18.33    4.58
  16  -2  -9    0.07    2.59
  17  -2  -8    4.66    2.97
  18  -2  -7   -1.99    2.59
  19  -2  -6   28.87    5.79
  20  -2  -5    0.30    3.05
  21  -2  -4   16.42    4.69
  22  -2  -3   -0.89    2.40
  23  -2  -2   23.05    5.62
  24  -2  -1    2.43    2.60
   2  -2 -24  174.96   12.30
   3  -2 -23   -1.74    1.57
   4  -2 -22    7.34    3.11
   5  -2 -21    2.69    2.33
   6  -2 -20   59.35    6.11
   7  -2 -19    0.76    1.96
   8  -2 -18  709.26   33.36
   9  -2 -17   -0.85    1.76
  10  -2 -16 1439.07   61.91
  10  -2 -16 1442.24   62.24
  11  -2 -15   -0.03    1.68
  11  -2 -15   -2.96    2.35
  12  -2 -14  290.74   16.17
  12  -2 -14  311.95   16.91
  13  -2 -13    1.18    2.87
  13  -2 -13    1.33    1.56
  14  -2 -12   88.71    7.70
  15  -2 -11    3.57    2.80
  16  -2 -10   90.89    8.09
  17  -2  -9    0.52    2.72
  18  -2  -8  152.11   11.36
  19  -2  -7   -2.39    2.37
  20  -2  -6  132.08   10.61
  21  -2  -5   -0.71    2.53
  22  -2  -4   63.46    8.08
  23  -2  -3   -1.77    2.14
  24  -2  -2    5.69    3.21
   3  -2 -24  144.64   11.02
   4  -2 -23   -0.55    1.76
   5  -2 -22   58.90    6.43
   6  -2 -21   -1.02    1.59
   7  -2 -20   54.86    6.61
   8  -2 -19   -1.07    1.86
   9  -2 -18   41.86    5.63
  10  -2 -17   -0.26    1.63
  11  -2 -16  116.53    8.79
  11  -2 -16  101.02    8.07
  12  -2 -15   -1.70    1.41
  12  -2 -15    2.09    2.51
  13  -2 -14  319.17   18.13
  13  -2 -14  341.56   17.64
  14  -2 -13    0.63    2.66
  15  -2 -12    0.52    2.80
  16  -2 -11    0.28    2.24
  17  -2 -10   69.53    7.22
  18  -2  -9    2.07    3.02
  19  -2  -8   75.57    7.93
  20  -2  -7   -2.27    2.31
  21  -2  -6   50.88    7.51
  22  -2  -5    0.88    2.45
  23  -2  -4    8.07    3.64
  24  -2  -3   -0.77    2.33
   4  -2 -24  158.07   11.66
   5  -2 -23   -0.42    1.75
   6  -2 -22    1.00    2.04
   7  -2 -21    1.75    1.73
   8  -2 -20   33.13    5.54
   9  -2 -19   -0.14    2.11
  10  -2 -18   13.20    3.68
  11  -2 -17    0.93    2.41
  11  -2 -17   -2.28    1.45
  12  -2 -16  374.35   19.65
  12  -2 -16  350.59   19.01
  13  -2 -15    0.11    2.01
  13  -2 -15   -1.20    1.35
  14  -2 -14  115.00    9.31
  14  -2 -14   97.88    7.65
  15  -2 -13    1.46    2.20
  16  -2 -12   17.75    4.78
  17  -2 -11   -1.22    2.69
  18  -2 -10  130.08   10.32
  19  -2  -9   -0.76    2.20
  20  -2  -8  122.89   10.39
  21  -2  -7   -3.29    2.41
  22  -2  -6   14.89    5.04
  23  -2  -5    2.42    2.73
  24  -2  -4   30.60    6.24
   6  -2 -23    0.08    2.01
   7  -2 -22   97.08    8.48
   8  -2 -21    0.60    1.71
   9  -2 -20   52.05    6.63
  10  -2 -19   -0.14    1.71
  11  -2 -18   53.47    5.86
  12  -2 -17    1.67    2.39
  12  -2 -17    0.02    1.62
  13  -2 -16   53.81    5.78
  13  -2 -16   66.38    6.77
  14  -2 -15    0.63    2.17
  14  -2 -15   -0.56    1.69
  15  -2 -14    9.10    3.90
  15  -2 -14    5.64    2.45
  16  -2 -13   -0.26    2.83
  17  -2 -12    8.46    3.67
  18  -2 -11   -2.19    2.32
  19  -2 -10   -2.71    2.01
  20  -2  -9   -0.13    2.83
  21  -2  -8   12.81    4.30
  22  -2  -7    1.30    2.78
  23  -2  -6   16.82    4.51
   7  -2 -23   -1.31    2.22
   8  -2 -22   94.05    8.38
   9  -2 -21   -1.28    1.95
  10  -2 -20  286.93   16.84
  11  -2 -19   -1.09    2.08
  12  -2 -18  107.52    8.67
  13  -2 -17   -2.07    2.19
  13  -2 -17   -0.01    1.72
  14  -2 -16   24.05    4.42
  14  -2 -16   32.35    5.66
  15  -2 -15   -1.96    2.74
  15  -2 -15   -0.66    1.63
  16  -2 -14   54.62    7.10
  16  -2 -14   31.33    4.61
  17  -2 -13    0.82    2.90
  18  -2 -12  175.90   12.67
  19  -2 -11    4.14    3.36
  20  -2 -10  219.77   14.74
  21  -2  -9    4.42    3.17
  22  -2  -8   35.78    6.44
  23  -2  -7    2.11    2.69
   8  -2 -23   -2.79    1.73
   9  -2 -22   29.19    5.24
  10  -2 -21   -0.14    2.26
  11  -2 -20   22.13    4.66
  12  -2 -19   -0.37    1.82
  13  -2 -18  172.43   11.73
  14  -2 -17   -4.08    2.39
  14  -2 -17    0.55    1.91
  15  -2 -16  115.46    8.72
  15  -2 -16  107.76    9.44
  16  -2 -15    0.84    1.61
  16  -2 -15    4.01    3.08
  17  -2 -14    6.78    3.24
  18  -2 -13    2.64    2.86
  19  -2 -12    1.96    3.63
  20  -2 -11    4.39    3.38
  21  -2 -10  104.07    9.68
  22  -2  -9    1.29    2.47
  23  -2  -8   19.04    5.11
  10  -2 -22    0.89    1.98
  11  -2 -21    1.32    2.00
  12  -2 -20   23.21    4.78
  13  -2 -19   -1.03    1.75
  14  -2 -18   39.40    5.72
  14  -2 -18   49.86    6.81
  15  -2 -17   -2.27    2.84
  15  -2 -17   -1.23    1.62
  16  -2 -16   30.04    5.64
  16  -2 -16   25.59    4.58
  17  -2 -15    0.05    1.76
  17  -2 -15    4.19    3.44
  18  -2 -14   52.79    7.55
  19  -2 -13    2.89    3.09
  20  -2 -12    3.62    3.27
  21  -2 -11    3.32    3.14
  22  -2 -10  131.63   11.06
  11  -2 -22   18.91    4.52
  12  -2 -21   -2.59    1.90
  13  -2 -20   13.62    4.17
  14  -2 -19   -1.32    1.76
  15  -2 -18   29.15    5.08
  15  -2 -18   35.49    5.95
  16  -2 -17    1.74    1.95
  16  -2 -17    0.33    2.81
  17  -2 -16    8.93    3.70
  17  -2 -16    3.38    2.39
  18  -2 -15   -0.64    1.51
  18  -2 -15    2.08    3.17
  19  -2 -14   30.89    6.20
  20  -2 -13    3.20    3.28
  21  -2 -12    2.59    3.06
  22  -2 -11    0.31    2.95
  14  -2 -20   70.90    7.19
  15  -2 -19   -0.84    1.71
  16  -2 -18   63.83    7.89
  16  -2 -18   63.35    6.48
  17  -2 -17    0.63    2.59
  17  -2 -17   -0.39    1.90
  18  -2 -16   65.66    8.13
  18  -2 -16   58.16    6.09
  19  -2 -15    0.15    2.73
  19  -2 -15   -0.01    1.52
  20  -2 -14  185.46   13.73
  21  -2 -13    4.82    3.13
  20   3 -13    2.41    2.41
  19   3 -14    4.85    2.90
  18   3 -15   -1.59    1.78
  17   3 -16   68.77    7.50
  16   3 -17   -3.47    1.43
  15   3 -18    0.81    2.33
  14   3 -19    0.70    2.28
  13   3 -20  290.46   18.12
  21   3 -11   -0.51    2.00
  20   3 -12  101.75    9.33
  19   3 -13    2.98    2.50
  18   3 -14  291.37   18.14
  17   3 -15   -0.98    1.71
  16   3 -16    8.93    3.67
  15   3 -17    0.89    2.31
  14   3 -18    4.59    2.56
  13   3 -19   -1.18    2.15
  12   3 -20   55.88    7.30
  11   3 -21    0.66    2.07
  21   3 -10    2.80    2.47
  20   3 -11    1.18    2.10
  19   3 -12  106.24    9.74
  18   3 -13   -2.09    1.87
  17   3 -14    2.23    2.30
  16   3 -15    1.20    2.02
  15   3 -16   66.91    7.35
  14   3 -17    4.23    2.74
  13   3 -18    9.95    3.43
  12   3 -19    1.54    2.53
  11   3 -20  194.40   13.56
  10   3 -21   -1.22    1.95
   9   3 -22   28.83    5.54
  22   3  -8   93.29    8.80
  21   3  -9   -0.23    2.10
  20   3 -10    0.75    2.23
  19   3 -11    1.30    2.27
  18   3 -12   -1.59    2.69
  17   3 -13    0.00    2.16
  16   3 -14   29.41    5.73
  15   3 -15   -0.68    2.34
  14   3 -16  152.10   11.53
  13   3 -17   -0.75    2.12
  12   3 -18    2.71    2.43
  11   3 -19   -0.26    2.52
  10   3 -20   15.12    4.39
   9   3 -21   -1.78    2.23
   8   3 -22   13.15    4.19
  22   3  -7    3.82    2.45
  21   3  -8   94.78    8.75
  20   3  -9    0.43    2.08
  19   3 -10   96.80    8.92
  18   3 -11    1.02    2.90
  17   3 -12    5.99    2.93
  16   3 -13    0.77    2.07
  15   3 -14   45.84    6.57
  14   3 -15   -0.55    2.05
  13   3 -16   57.61    7.19
  12   3 -17    7.34    3.63
  11   3 -18  150.71   11.28
  10   3 -19    1.01    2.71
   9   3 -20   11.39    3.78
   8   3 -21   -1.71    2.24
   7   3 -22    5.19    3.24
  23   3  -5    4.47    2.56
  22   3  -6   16.59    4.51
  21   3  -7    1.82    2.73
  20   3  -8   19.51    4.96
  19   3  -9    1.07    2.41
  18   3 -10   60.79    7.51
  17   3 -11    0.88    2.02
  16   3 -12  166.03   11.99
  15   3 -13   -2.51    1.95
  14   3 -14  138.73   10.60
  13   3 -15    2.63    2.77
  12   3 -16   26.14    5.26
  11   3 -17    4.79    2.61
  10   3 -18  329.36   18.80
   9   3 -19   -1.16    2.06
   8   3 -20  213.79   14.15
   7   3 -21    0.52    2.29
   6   3 -22   48.76    6.64
   5   3 -23   -0.28    2.44
  23   3  -4  108.78    9.43
  22   3  -5    6.04    3.07
  21   3  -6  278.84   17.25
  20   3  -7   -3.42    1.82
  19   3  -8    0.69    2.15
  18   3  -9    2.41    2.33
  17   3 -10  293.18   17.49
  16   3 -11   -0.16    2.39
  15   3 -12  173.71   12.10
  14   3 -13   -1.60    2.04
  13   3 -14  131.90   10.04
  12   3 -15   -1.74    1.83
  11   3 -16   48.55    6.59
  10   3 -17   -5.65    1.74
   9   3 -18  397.49   21.65
   8   3 -19   -0.31    2.04
   7   3 -20    6.94    2.96
   6   3 -21    3.36    2.71
   5   3 -22    4.01    2.91
   4   3 -23   -1.25    2.36
  23   3  -3    1.95    2.30
  22   3  -4  179.97   12.81
  21   3  -5    4.50    2.51
  20   3  -6    2.11    2.28
  19   3  -7   -0.77    2.31
  18   3  -8    3.38    2.56
  17   3  -9    2.76    2.89
  16   3 -10   58.53    7.22
  15   3 -11   -0.58    2.09
  14   3 -12  277.15   16.44
  13   3 -13    0.29    2.23
  12   3 -14   59.52    7.13
  11   3 -15   -0.35    2.19
  10   3 -16    8.50    3.35
   9   3 -17    1.68    2.73
   8   3 -18   29.27    5.25
   7   3 -19    0.49    2.27
   6   3 -20   86.65    7.99
   5   3 -21   -0.40    1.85
   4   3 -22    3.37    2.87
   3   3 -23   -1.65    2.27
  22   3  -3    2.96    2.61
  21   3  -4   52.36    6.88
  20   3  -5    1.36    2.10
  19   3  -6  125.34    9.91
  18   3  -7   -1.73    1.78
  17   3  -8  173.02   11.83
  16   3  -9   -2.88    1.83
  15   3 -10    6.02    3.01
  14   3 -11   -1.59    1.83
  13   3 -12   20.70    4.46
  12   3 -13   -0.40    1.68
  11   3 -14  133.34    9.90
  10   3 -15   -3.48    1.68
   9   3 -16   24.69    4.92
   8   3 -17   -0.04    2.64
   7   3 -18   17.23    4.38
   6   3 -19   -1.35    2.06
   5   3 -20    3.01    2.85
   4   3 -21   -0.98    1.87
  -4  -3  21   -0.89    1.14
   3   3 -22   50.06    6.77
  -3  -3  22   48.47    6.32
   2   3 -23    2.61    2.59
  -2  -3  23   -0.04    2.28
  22   3  -2   89.85    8.10
  21   3  -3    0.58    2.25
  20   3  -4   21.25    4.73
  19   3  -5    1.57    2.11
  18   3  -6   37.13    5.73
  17   3  -7    2.40    2.17
  16   3  -8  104.29    8.36
  15   3  -9    1.33    2.26
  14   3 -10  196.26   12.57
  13   3 -11   -0.52    1.82
  12   3 -12   34.25    5.18
  11   3 -13   -0.15    2.07
  10   3 -14  152.82   10.60
   9   3 -15   -1.74    1.95
   8   3 -16  313.77   17.47
  -8  -3  16  306.26   15.71
   7   3 -17   -1.74    1.80
  -7  -3  17    1.43    1.69
   6   3 -18  141.93   10.40
  -6  -3  18  141.26    9.40
   5   3 -19    2.05    2.66
  -5  -3  19    0.50    0.85
   4   3 -20    5.37    2.89
  -4  -3  20    1.89    1.67
   3   3 -21   -2.19    2.13
  -3  -3  21   -1.74    1.52
   2   3 -22   82.61    7.83
  -2  -3  22  102.18    8.31
  -1  -3  23   -2.30    1.88
  21   3  -2    6.96    3.00
  20   3  -3    7.94    3.04
  19   3  -4  245.91   14.96
  18   3  -5    1.06    1.66
  17   3  -6   39.62    5.65
  16   3  -7   -0.08    1.65
  15   3  -8  509.18   25.52
  14   3  -9    1.55    2.19
  13   3 -10  131.21    9.58
  12   3 -11   -0.49    1.84
  11   3 -12  144.63    9.98
 -10  -3  13    0.24    0.82
  10   3 -13   -0.51    1.94
 -10  -3  13   -0.71    1.06
  -9  -3  14   63.37    4.99
   9   3 -14   55.85    5.95
   8   3 -15    2.52    2.50
  -8  -3  15    3.62    1.45
   7   3 -16  460.49   23.37
  -7  -3  16  451.00   21.52
  -6  -3  17    0.89    1.46
   6   3 -17    0.61    2.34
   5   3 -18   10.01    3.36
   4   3 -19   -1.08    2.22
  -4  -3  19    0.06    1.35
   3   3 -20   26.98    5.03
  -3  -3  20   32.53    5.08
   2   3 -21    1.44    2.65
  -2  -3  21    2.75    2.16
  -1  -3  22   83.44    7.70
   0  -3  23   -0.13    2.01
  20   3  -2  302.43   17.37
  19   3  -3   -0.42    1.61
  18   3  -4  180.82   11.95
  17   3  -5    2.46    2.14
  16   3  -6   -1.75    1.48
  15   3  -7   -0.84    1.42
  14   3  -8  375.39   19.89
  13   3  -9   -0.32    1.12
  13   3  -9    2.56    2.24
  12   3 -10  335.12   17.96
  12   3 -10  330.49   15.81
 -11  -3  11   -0.01    0.86
 -11  -3  11   -0.50    0.71
  11   3 -11   -1.41    1.48
  10   3 -12   12.12    3.35
 -10  -3  12   20.47    3.05
 -10  -3  12   14.92    2.58
   9   3 -13   -0.36    1.75
  -9  -3  13    0.52    1.08
  -9  -3  13   -1.52    1.09
   8   3 -14   97.73    7.80
  -8  -3  14   95.47    6.60
  -7  -3  15    1.93    1.17
   7   3 -15   -0.31    2.00
   6   3 -16  134.00    9.45
  -6  -3  16  122.32    8.30
  -5  -3  17   -1.48    0.69
   5   3 -17   -0.09    2.01
   4   3 -18  317.00   17.68
  -4  -3  18  317.26   16.79
  -3  -3  19    1.53    1.80
   3   3 -19   -1.16    2.23
  -2  -3  20    4.72    2.80
   2   3 -20    5.12    3.09
   1   3 -21    0.42    2.43
  -1  -3  21    1.49    2.21
   0  -3  22   52.77    6.87
   1  -3  23    0.50    1.90
  20   3  -1    2.03    1.30
  19   3  -2   57.73    6.04
  18   3  -3    1.21    2.07
  17   3  -4   23.52    4.48
  16   3  -5   -1.24    1.47
  15   3  -6   36.77    3.80
  15   3  -6   38.39    5.42
  14   3  -7    0.46    1.10
  14   3  -7    1.51    2.21
  13   3  -8  389.45   19.99
  13   3  -8  378.61   17.73
  12   3  -9   -2.33    1.49
  12   3  -9    0.45    0.97
  11   3 -10    4.32    2.50
  11   3 -10    4.84    1.61
  10   3 -11    0.76    1.79
 -10  -3  11    1.97    1.00
   9   3 -12  127.04    9.10
  -9  -3  12  126.33    7.32
  -9  -3  12  130.58    7.81
  -8  -3  13    2.02    1.18
   8   3 -13   -2.03    1.81
  -7  -3  14  107.70    7.13
   7   3 -14  109.22    8.36
  -6  -3  15   -0.63    0.55
   6   3 -15   -1.29    1.60
   5   3 -16   18.87    4.22
   4   3 -17   -0.20    2.06
  -4  -3  17    1.93    1.96
   3   3 -18   23.20    4.73
  -3  -3  18   31.39    4.64
   2   3 -19   -0.32    2.15
  -2  -3  19    1.90    1.61
   1   3 -20    5.75    3.01
  -1  -3  20    2.55    1.91
   0  -3  21    1.86    2.37
   1  -3  22  121.05    9.81
   2  -3  23    5.83    3.08
  19   3  -1   -0.12    1.10
  18   3  -2   85.01    6.76
  18   3  -2   78.67    6.95
  17   3  -3   -1.07    1.30
  17   3  -3    1.56    1.90
  16   3  -4   26.45    3.63
  16   3  -4   22.69    4.35
  15   3  -5    1.51    1.51
  15   3  -5   -0.07    2.06
  14   3  -6  150.30    9.94
  14   3  -6  147.50    8.66
  13   3  -7    0.81    0.94
  13   3  -7   -1.64    1.58
  12   3  -8    9.75    2.03
  12   3  -8    7.92    3.06
  11   3  -9   -1.62    1.47
  11   3  -9    0.20    0.80
  10   3 -10    5.44    1.85
  10   3 -10    7.41    2.53
   9   3 -11    0.37    1.71
  -9  -3  11    2.87    1.06
  -9  -3  11    0.19    0.67
  -8  -3  12   21.47    2.95
  -8  -3  12   17.92    2.81
   8   3 -12   18.14    3.94
  -7  -3  13    1.95    0.93
   7   3 -13    0.34    2.05
   6   3 -14    1.63    2.36
  -6  -3  14    0.40    0.47
   5   3 -15    1.15    2.17
  -5  -3  15    1.14    1.20
  -4  -3  16  199.00   11.79
   4   3 -16  206.29   12.58
  -3  -3  17    0.99    1.69
   3   3 -17   -0.97    2.04
   2   3 -18    9.67    3.37
  -2  -3  18   10.49    3.18
  -1  -3  19   -1.21    1.22
   1   3 -19   -1.47    2.01
   0  -3  20  227.24   13.91
   1  -3  21    0.96    1.97
   2  -3  22  183.55   12.67
   3  -3  23   -0.21    1.86
  19   3   0   -0.41    1.79
  19   3   0    8.37    2.45
  18   3  -1   -0.24    0.95
  18   3  -1    3.26    2.43
  17   3  -2  190.54   10.79
  17   3  -2  170.26   11.38
  16   3  -3   -1.32    1.81
  16   3  -3    2.71    1.41
  15   3  -4  256.22   14.72
  15   3  -4  265.10   13.36
  14   3  -5    1.50    1.31
  14   3  -5   -0.11    1.74
  13   3  -6  171.80    9.58
  13   3  -6  180.01   11.06
  12   3  -7   -0.86    0.89
  12   3  -7   -0.75    1.60
  11   3  -8   60.78    5.68
  11   3  -8   61.38    4.72
  10   3  -9   -0.86    1.44
  10   3  -9    0.09    1.02
   9   3 -10  105.15    7.74
   8   3 -11   -0.55    1.38
  -8  -3  11   -0.04    0.68
  -8  -3  11   -0.03    0.76
  -7  -3  12  130.76    7.54
  -7  -3  12  137.74    8.06
  -6  -3  13    0.06    0.50
   6   3 -13    0.39    2.04
  -5  -3  14  857.46   36.67
   5   3 -14  845.87   38.50
   4   3 -15   -2.67    2.08
  -4  -3  15    0.47    1.32
  -3  -3  16  198.41   11.72
   3   3 -16  198.13   12.32
   2   3 -17   -2.13    1.83
  -2  -3  17    0.60    1.77
   1   3 -18  169.53   11.40
  -1  -3  18  185.65   11.50
   0  -3  19   -0.88    1.70
   1  -3  20   59.37    6.91
   2  -3  21    1.94    2.10
   3  -3  22  178.39   12.52
  21   3   3    0.96    2.29
  20   3   2  451.70   22.48
  19   3   1    8.98    2.61
  18   3   0  235.94   14.10
  18   3   0  257.54   13.89
  17   3  -1    1.47    1.77
  17   3  -1    1.59    1.13
  16   3  -2   20.69    3.97
  16   3  -2   17.10    3.23
  15   3  -3   -0.21    1.24
  15   3  -3    1.46    1.78
  14   3  -4  206.72   11.00
  14   3  -4  200.43   12.04
  13   3  -5    2.19    1.59
  13   3  -5   -0.90    0.84
  12   3  -6  412.16   19.28
  12   3  -6  435.27   21.06
  11   3  -7    1.25    1.27
  11   3  -7   -0.04    1.29
  10   3  -8  383.89   17.85
  10   3  -8  389.34   19.37
   9   3  -9   -0.61    1.28
   9   3  -9   -0.18    0.98
   8   3 -10    1.46    1.47
  -8  -3  10   -0.10    0.74
  -8  -3  10    2.22    0.93
  -7  -3  11   -0.41    0.38
  -7  -3  11   -0.37    0.44
   7   3 -11    0.15    1.46
  -6  -3  12   54.11    4.40
  -6  -3  12   46.87    3.97
  -5  -3  13    1.16    1.06
   5   3 -13    0.52    1.91
  -4  -3  14  861.01   36.91
   4   3 -14  857.06   38.78
   3   3 -15   -0.10    2.24
  -3  -3  15   -1.93    1.06
  -2  -3  16    2.24    2.05
   2   3 -16    2.46    2.58
   1   3 -17    3.24    2.46
  -1  -3  17    0.50    1.40
   0  -3  18   12.18    3.41
   0   3 -18    5.68    2.88
   1  -3  19    0.97    2.23
   2  -3  20  199.92   13.03
   3  -3  21    1.22    2.41
   4  -3  22  132.20   10.49
  22   3   5    0.20    2.20
  21   3   4  218.86   13.56
  20   3   3    1.76    2.21
  19   3   2  329.67   17.44
  18   3   1   -0.18    1.40
  17   3   0   11.92    3.20
  17   3   0   13.84    3.43
  16   3  -1   -0.28    0.89
  16   3  -1   -1.25    1.38
  15   3  -2  187.48   11.50
  15   3  -2  204.39   11.07
  14   3  -3    0.48    1.33
  14   3  -3    0.19    1.12
  13   3  -4  547.76   24.18
  13   3  -4  543.41   25.72
  12   3  -5   -1.59    1.35
  12   3  -5    1.71    1.05
  11   3  -6  314.83   14.94
  11   3  -6  301.51   16.00
  10   3  -7   -0.66    1.35
  10   3  -7   -0.25    1.11
   9   3  -8  246.16   12.34
   9   3  -8  245.41   13.42
   8   3  -9   -1.51    1.08
   8   3  -9   -0.14    1.36
  -7  -3  10    0.89    0.54
   7   3 -10    8.45    2.43
   6   3 -11    2.89    1.79
  -6  -3  11    0.16    0.64
  -6  -3  11    0.46    0.87
  -5  -3  12   16.36    2.91
   5   3 -12   15.13    3.35
  -4  -3  13    2.12    1.37
   4   3 -13    0.94    1.88
  -3  -3  14   99.84    7.03
   3   3 -14  101.29    7.95
   2   3 -15   -1.75    1.77
  -2  -3  15   -1.16    1.34
  -1  -3  16  127.51    8.96
   1   3 -16  136.57    9.50
   0   3 -17   -0.78    1.63
   0  -3  17    0.74    1.48
   1  -3  18  145.15   10.13
   2  -3  19   -0.61    1.95
   3  -3  20   40.46    6.16
   4  -3  21    0.08    1.86
   5  -3  22   31.47    5.81
  22   3   6   40.93    6.06
  21   3   5    2.37    2.03
  20   3   4   11.38    3.59
  19   3   3    0.17    1.54
  18   3   2   16.74    3.68
  17   3   1    2.10    1.77
  17   3   1   -0.64    1.57
  16   3   0  115.11    8.00
  16   3   0  113.03    7.90
  15   3  -1   -0.87    0.97
  15   3  -1   -0.09    0.90
  14   3  -2    5.42    1.91
  14   3  -2    2.86    1.99
  13   3  -3   -0.15    0.95
  13   3  -3    1.61    1.86
  12   3  -4    0.41    1.15
  12   3  -4    0.99    1.58
  11   3  -5   -0.47    1.07
  11   3  -5    0.28    1.49
  10   3  -6    0.84    1.52
  10   3  -6    0.93    1.09
   9   3  -7    0.19    1.08
   9   3  -7    1.08    1.43
   8   3  -8   30.01    3.51
   8   3  -8   35.74    4.46
   7   3  -9   -0.49    1.21
   6   3 -10   76.53    6.28
  -6  -3  10   87.07    5.55
  -6  -3  10   87.79    5.92
  -5  -3  11    1.47    0.83
  -5  -3  11    2.05    1.15
   5   3 -11    2.82    1.86
  -4  -3  12  240.84   12.14
   4   3 -12  213.57   12.72
   3   3 -13   -1.82    1.58
  -3  -3  13    0.15    1.12
   2   3 -14   16.35    3.91
  -2  -3  14   13.02    3.07
   1   3 -15    0.24    2.19
  -1  -3  15    0.00    1.27
   0  -3  16  517.89   24.56
   0   3 -16  512.86   25.08
   1  -3  17   -0.07    1.47
   2  -3  18    0.80    1.94
   3  -3  19   -1.73    1.76
   4  -3  20   39.87    5.97
   5  -3  21   -0.47    2.20
   6  -3  22    0.64    2.16
  21   3   6  267.47   15.78
  20   3   5    2.70    2.35
  19   3   4   32.80    5.11
  18   3   3    0.42    1.57
  17   3   2   46.50    5.57
  16   3   1    3.05    1.54
  16   3   1    2.10    1.90
  15   3   0   27.00    3.95
  15   3   0   27.33    4.06
  14   3  -1    1.20    1.41
  14   3  -1    0.89    1.10
  13   3  -2  216.61   12.08
  12   3  -3    0.12    1.23
  12   3  -3    0.59    0.98
  11   3  -4    3.65    1.73
  11   3  -4    4.33    1.84
  10   3  -5   -0.93    1.00
  10   3  -5   -0.20    1.03
   9   3  -6   64.60    4.75
   9   3  -6   55.19    5.02
   8   3  -7   -1.58    0.90
   8   3  -7   -0.37    1.15
   7   3  -8  480.51   22.73
   7   3  -8  483.17   21.52
  -6  -3   9    0.24    1.05
  -6  -3   9   -1.29    0.80
   6   3  -9   -0.18    1.15
  -5  -3  10  489.10   20.79
  -5  -3  10  495.85   22.07
   5   3 -10  485.40   23.29
   4   3 -11    1.65    1.72
  -4  -3  11    0.74    1.02
  -4  -3  11    1.06    0.93
   3   3 -12   40.49    4.75
  -3  -3  12   31.09    3.85
   2   3 -13    0.02    1.64
  -2  -3  13    0.02    1.11
   1   3 -14   46.49    5.47
  -1  -3  14   43.84    4.51
   0   3 -15   -2.61    1.97
   0  -3  15   -0.95    1.14
   1  -3  16  104.29    8.01
   2  -3  17   -0.53    1.68
   3  -3  18   41.97    5.84
   4  -3  19   -0.24    1.86
   5  -3  20  186.25   12.66
   6  -3  21    0.89    2.01
   7  -3  22   53.80    7.26
  21   3   7    5.09    2.67
  20   3   6   88.57    7.63
  19   3   5    1.26    2.20
  18   3   4   20.21    4.23
  17   3   3    1.54    2.01
  16   3   2  118.49    8.35
  15   3   1    5.83    2.16
  15   3   1    8.13    2.08
  14   3   0   14.92    2.80
  14   3   0    8.19    2.17
  13   3  -1    3.22    1.57
  13   3  -1    3.23    1.25
  11   3  -3    0.58    1.40
  11   3  -3    1.90    1.58
  10   3  -4 1419.62   60.84
  10   3  -4 1474.30   58.67
   9   3  -5   -0.22    1.23
   9   3  -5   -0.25    1.12
   8   3  -6  675.24   30.42
   8   3  -6  688.92   29.17
   7   3  -7   -0.06    1.14
   7   3  -7    0.04    1.04
   6   3  -8   -0.08    1.13
   6   3  -8    2.93    1.43
  -5  -3   9    0.37    0.99
  -5  -3   9   -0.54    0.86
   5   3  -9    1.73    1.37
  -4  -3  10 1031.76   40.01
  -4  -3  10 1049.39   42.37
   4   3 -10  974.07   43.99
   3   3 -11    2.69    1.90
  -3  -3  11    0.81    1.15
  -2  -3  12  412.87   19.33
   2   3 -12  411.01   20.32
  -1  -3  13   -0.06    0.96
   1   3 -13   -0.58    1.53
   0   3 -14  750.51   33.13
   0  -3  14  692.17   31.90
   1  -3  15   -0.51    1.46
   2  -3  16  182.47   11.39
   3  -3  17   -0.45    1.73
   4  -3  18  795.69   36.43
   5  -3  19    5.02    2.59
   6  -3  20   80.86    7.90
   7  -3  21   -0.42    1.91
  21   3   8   55.08    6.92
  20   3   7    2.83    2.24
  19   3   6  203.10   12.64
  18   3   5    1.59    1.98
  17   3   4  234.72   13.50
  16   3   3    0.42    1.95
  15   3   2  213.84   12.09
  15   3   2  211.87   11.76
  14   3   1   -0.90    1.11
  14   3   1    4.52    1.50
  13   3   0  130.24    8.27
  13   3   0  135.21    8.38
  12   3  -1    1.17    1.06
  12   3  -1    0.64    1.30
  11   3  -2 1103.95   45.84
  10   3  -3   -0.98    1.01
  10   3  -3    0.04    1.43
   9   3  -4  154.84    8.65
   9   3  -4  154.49    9.12
   8   3  -5   -0.29    1.06
   8   3  -5    0.22    1.12
   7   3  -6  348.48   17.14
   7   3  -6  352.59   16.26
   6   3  -7   -0.56    1.07
   6   3  -7    0.00    1.24
   5   3  -8    2.59    1.56
  -4  -3   9    0.57    1.11
  -4  -3   9    1.10    1.02
   4   3  -9    2.06    1.28
  -3  -3  10 1724.82   66.65
   3   3 -10 1739.58   73.38
  -3  -3  10 1802.93   70.70
  -2  -3  11    0.15    1.01
   2   3 -11   -0.55    1.36
  -1  -3  12 1009.60   42.44
   1   3 -12 1010.27   44.10
   0  -3  13   -1.33    0.97
   0   3 -13   -0.72    1.44
   1  -3  14  316.12   16.25
   2  -3  15    0.84    1.80
   3  -3  16   31.21    4.90
   4  -3  17    1.67    1.97
   5  -3  18  299.43   17.09
   6  -3  19   -0.88    1.76
   7  -3  20   73.18    8.25
   8  -3  21    1.11    2.08
  21   3   9    0.04    2.34
  20   3   8   34.86    5.65
  19   3   7    0.34    2.04
  18   3   6   -0.50    1.96
  17   3   5   -3.56    1.35
  16   3   4  461.40   22.35
  15   3   3    1.47    2.00
  14   3   2   98.05    6.81
  14   3   2  107.06    7.39
  13   3   1    0.92    1.32
  13   3   1   -1.02    0.96
  12   3   0    0.22    1.06
  12   3   0    1.55    1.30
  11   3  -1    1.60    1.24
  11   3  -1    4.62    1.66
   9   3  -3   -0.57    1.22
   9   3  -3   -0.33    0.97
   8   3  -4  389.80   17.55
   8   3  -4  377.48   18.23
   7   3  -5    0.56    1.16
   7   3  -5    0.95    1.37
   6   3  -6 1309.84   56.55
   6   3  -6 1388.52   54.72
   5   3  -7   -0.21    1.15
   5   3  -7   -0.79    1.10
  -4  -3   8    2.32    1.13
  -4  -3   8    0.76    1.05
   4   3  -8    3.94    1.76
   3   3  -9    0.66    1.17
  -3  -3   9    0.70    1.09
  -3  -3   9    0.42    0.90
  -2  -3  10   65.15    5.13
   2   3 -10   76.65    5.77
  -1  -3  11   -0.18    0.89
   1   3 -11    1.47    1.73
   0  -3  12   38.26    3.98
   0   3 -12   44.81    5.03
   1  -3  13    0.49    1.26
  -1   3 -13   -0.71    1.28
   2  -3  14  162.63   10.17
   3  -3  15   -0.32    1.67
   4  -3  16  224.59   13.37
   5  -3  17   -0.76    1.98
   6  -3  18    4.46    2.53
   7  -3  19   -0.59    2.30
   8  -3  20    6.40    2.85
   9  -3  21    4.09    2.52
  20   3   9    0.12    1.87
  19   3   8   42.93    5.99
  18   3   7   -0.18    1.75
  17   3   6   43.43    5.61
  16   3   5    0.82    1.76
  15   3   4    4.34    2.53
  14   3   3    2.20    1.74
  13   3   2    0.25    1.22
  13   3   2    1.92    1.50
  12   3   1   -0.02    1.34
  12   3   1   -0.67    1.30
  11   3   0  564.38   24.96
  11   3   0  539.50   24.51
  10   3  -1    1.52    1.37
  10   3  -1   -0.60    0.92
   8   3  -3   -1.31    0.98
   8   3  -3    0.70    1.26
   7   3  -4    7.83    2.03
   7   3  -4    5.45    1.84
   6   3  -5   -0.33    1.18
   6   3  -5   -1.57    0.69
   5   3  -6    3.35    1.55
   5   3  -6    5.21    2.00
   4   3  -7    3.26    1.51
   4   3  -7    0.47    1.10
   3   3  -8  420.25   20.00
  -3  -3   8  424.40   18.09
  -3  -3   8  424.34   19.09
   2   3  -9    2.44    1.60
  -2  -3   9    2.07    1.21
  -2  -3   9    0.30    1.13
   1   3 -10    8.74    2.47
   0  -3  11    0.15    1.07
   0   3 -11   -0.80    1.55
  -1   3 -12  497.67   23.82
   1  -3  12  516.67   23.33
   2  -3  13    0.99    1.38
   3  -3  14  168.82   10.54
   4  -3  15    0.41    1.42
   5  -3  16  602.68   28.42
   6  -3  17    1.04    2.56
   7  -3  18   21.55    4.94
   8  -3  19    0.35    1.90
   9  -3  20  128.26   10.29
  20   3  10    2.41    2.22
  19   3   9   -0.43    1.81
  18   3   8    3.86    2.76
  17   3   7    3.48    2.41
  16   3   6  378.81   19.33
  15   3   5    0.31    1.80
  14   3   4  174.50   10.59
  13   3   3    1.59    1.37
  13   3   3    0.64    1.23
  12   3   2   20.40    3.58
  12   3   2   26.00    3.27
  11   3   1   -0.95    0.92
  11   3   1    0.34    0.92
  10   3   0  191.91   10.30
  10   3   0  184.92    9.99
   9   3  -1    0.99    1.38
   9   3  -1    2.18    1.35
   7   3  -3   -0.32    1.07
   7   3  -3   -0.49    1.06
   6   3  -4  252.29   12.12
   6   3  -4  238.39   12.32
   5   3  -5    0.30    1.04
   5   3  -5    0.11    1.03
   4   3  -6  377.57   17.62
   4   3  -6  359.68   16.79
   3   3  -7    1.84    1.32
   2   3  -8 1560.82   66.92
  -2  -3   8 1633.68   61.16
  -2  -3   8 1625.38   64.73
   1   3  -9    0.99    1.52
  -1  -3   9   -0.16    1.08
  -1  -3   9    0.01    1.05
   0   3 -10  608.59   27.31
   0  -3  10  593.90   26.25
  -1   3 -11   -0.63    1.25
   1  -3  11    0.66    1.24
   2  -3  12   16.84    3.10
   3  -3  13    0.81    1.29
   4  -3  14  199.86   11.94
   5  -3  15    0.30    1.80
   6  -3  16    7.23    2.98
   7  -3  17    1.61    2.53
   8  -3  18  231.82   14.43
   9  -3  19    1.15    2.21
  10  -3  20    2.17    2.04
  20   3  11   -2.45    1.46
  19   3  10   64.55    7.37
  18   3   9    3.40    2.19
  17   3   8  349.52   18.66
  16   3   7   -0.11    1.60
  15   3   6   65.08    6.01
  14   3   5   -0.74    1.87
  13   3   4   71.29    5.94
  12   3   3    1.97    1.06
  12   3   3    0.29    1.39
  11   3   2    0.88    1.10
  11   3   2    0.41    1.20
  10   3   1    1.99    1.12
  10   3   1   -1.36    0.87
   9   3   0 2234.80   91.40
   9   3   0 2250.01   89.19
   8   3  -1    0.14    1.09
   8   3  -1    1.04    1.15
   6   3  -3   -2.18    0.75
   6   3  -3   -0.56    1.04
   5   3  -4  457.86   20.43
   5   3  -4  468.99   21.04
   4   3  -5   -1.13    0.85
   4   3  -5   -0.71    0.86
   3   3  -6   67.67    5.11
   3   3  -6   72.98    5.07
   2   3  -7   -0.15    1.19
  -2  -3   7    0.25    1.08
  -2  -3   7    0.86    1.07
   1   3  -8 3036.36  127.12
  -1  -3   8 3171.26  122.97
  -1  -3   8 3182.80  116.24
   0  -3   9   -0.34    1.00
   0   3  -9   -1.19    1.12
  -1   3 -10  674.24   29.89
   1  -3  10  660.24   28.95
   2  -3  11   -0.05    1.16
   3  -3  12   14.65    3.06
   4  -3  13    0.01    1.56
   5  -3  14   52.31    5.89
   6  -3  15    1.01    1.83
   7  -3  16 1107.63   48.39
   8  -3  17   -0.26    1.93
   9  -3  18  422.41   22.45
  10  -3  19   -0.48    2.03
  11  -3  20   24.74    5.12
  19   3  11    2.22    2.09
  18   3  10   10.65    3.59
  17   3   9    2.13    2.33
  16   3   8  123.42    9.07
  15   3   7    0.31    1.77
  14   3   6  590.89   27.19
  13   3   5   -1.69    1.64
  12   3   4  209.45   11.58
  11   3   3    0.40    1.04
  11   3   3   -0.01    1.25
  10   3   2  157.92    9.03
  10   3   2  156.25    8.42
   9   3   1    0.69    1.24
   9   3   1    1.85    1.03
   8   3   0  351.47   15.76
   8   3   0  323.91   15.82
   7   3  -1   -0.74    0.91
   7   3  -1    0.23    0.78
   5   3  -3   -0.42    0.96
   5   3  -3   -0.72    0.76
   4   3  -4   53.43    4.11
   4   3  -4   53.03    4.16
   3   3  -5   -0.83    0.96
   3   3  -5    0.85    1.02
   2   3  -6  318.20   15.23
   2   3  -6  341.77   15.92
  -1  -3   7    2.28    1.32
   1   3  -7    0.27    1.26
  -1  -3   7    0.35    1.19
   0  -3   8  228.06   10.96
   0   3  -8  233.80   12.14
   0  -3   8  228.99   11.63
   1  -3   9   -0.03    1.06
   2  -3  10  147.85    8.64
   3  -3  11   -1.01    1.02
   4  -3  12  266.10   14.09
   5  -3  13   -1.18    1.39
   6  -3  14  184.71   11.43
   7  -3  15    3.82    2.44
   8  -3  16  124.51    9.57
   9  -3  17    2.64    2.87
  10  -3  18   23.88    5.19
  11  -3  19    2.57    2.55
  19   3  12    9.10    3.11
  18   3  11   -1.73    1.68
  17   3  10   52.83    6.48
  16   3   9    1.47    2.06
  15   3   8  193.04   11.97
  14   3   7    0.24    1.71
  13   3   6   36.90    4.92
  12   3   5    0.00    1.35
  11   3   4   46.46    3.57
  11   3   4   46.31    4.40
  10   3   3   -0.36    0.84
  10   3   3    0.96    1.10
   9   3   2  399.51   18.54
   9   3   2  404.69   18.11
   8   3   1   -1.70    0.90
   8   3   1   -0.42    0.83
   7   3   0   58.39    4.71
   7   3   0   76.79    4.67
   6   3  -1    0.63    1.03
   6   3  -1   -0.56    0.86
   4   3  -3   -0.59    0.89
   4   3  -3    0.28    0.65
   3   3  -4  102.63    6.23
   3   3  -4   95.59    5.92
   2   3  -5    0.12    1.02
   2   3  -5    0.70    0.85
  -1  -3   6 2647.64   98.57
  -1  -3   6 2682.95  104.37
   1   3  -6 2622.51  107.77
   0  -3   7    0.15    1.06
   0   3  -7    0.41    1.03
   0  -3   7   -0.15    1.04
   1  -3   8  109.20    6.79
   2  -3   9    1.00    1.16
   3  -3  10   70.93    5.43
   4  -3  11    1.98    1.40
   5  -3  12   43.69    5.07
   6  -3  13    0.86    1.95
   7  -3  14  544.66   25.92
   8  -3  15    0.60    2.45
   9  -3  16   10.12    3.99
  10  -3  17    1.52    2.44
  11  -3  18   25.23    5.43
  12  -3  19    4.70    2.54
  18   3  12   20.11    4.64
  17   3  11    0.77    1.90
  16   3  10   41.77    5.74
  15   3   9    0.63    2.08
  14   3   8   47.66    5.78
  13   3   7   -0.72    1.65
  12   3   6   18.45    3.61
  11   3   5   -1.93    0.74
  10   3   4   85.29    5.22
  10   3   4   88.07    6.22
   9   3   3   -0.78    1.05
   9   3   3    1.61    0.89
   8   3   2   44.98    3.46
   8   3   2   48.30    4.13
   7   3   1   -0.81    1.01
   7   3   1   -0.55    0.79
   6   3   0  325.64   14.74
   6   3   0  316.76   14.87
   5   3  -1   -1.69    0.79
  -5  -3   1    0.19    0.37
   5   3  -1    1.48    1.13
   4   3  -2   37.24    3.29
   3   3  -3   -0.41    0.75
   3   3  -3   -1.25    0.64
   2   3  -4  963.62   39.24
   2   3  -4  947.13   40.30
   1   3  -5   -0.24    0.99
   1   3  -5   -0.86    0.92
   0  -3   6   -0.96    1.14
   0  -3   6    2.35    1.53
   0   3  -6    2.21    1.59
   1  -3   7    1.22    1.21
   1  -3   7    0.91    1.29
   2  -3   8  680.67   29.10
   3  -3   9    0.24    1.03
   4  -3  10   30.32    3.90
   5  -3  11    0.65    1.47
   6  -3  12  396.04   19.57
   7  -3  13   -0.40    1.88
   8  -3  14 1023.74   44.72
   9  -3  15   -0.84    2.09
  10  -3  16    8.69    3.53
  11  -3  17    3.33    2.80
  12  -3  18   11.11    3.84
  18   3  13   -1.51    1.52
  17   3  12    2.45    2.38
  16   3  11    1.25    1.95
  15   3  10  341.06   18.13
  14   3   9    3.49    2.24
  13   3   8    6.78    2.68
  11   3   6   98.28    7.03
  10   3   5   -0.42    1.21
   9   3   4   99.65    5.50
   9   3   4   92.51    6.39
   8   3   3    1.97    0.84
   8   3   3   -1.92    0.77
   7   3   2 1464.16   61.25
   7   3   2 1545.22   60.69
   6   3   1    1.18    0.96
  -6  -3  -1    0.09    0.62
   6   3   1    0.19    0.91
   5   3   0  924.64   37.98
  -5  -3   0  913.60   37.53
   5   3   0  922.61   38.34
   4   3  -1    0.79    0.92
   4   3  -1    0.12    0.95
  -4  -3   1   -0.60    0.38
   3   3  -2  773.51   32.38
  -3  -3   2  802.30   31.00
   3   3  -2  706.99   31.55
   2   3  -3   -1.12    0.75
   2   3  -3    0.94    0.84
   1   3  -4  528.58   22.62
   1   3  -4  521.98   23.12
   0  -3   5   -1.08    0.71
   0   3  -5   -0.21    1.04
   0  -3   5    0.57    0.88
   1  -3   6 2390.82   94.75
   1  -3   6 2412.82   89.55
   2  -3   7    0.62    1.14
   3  -3   8 1305.44   53.23
   4  -3   9   -1.61    0.69
   5  -3  10    6.76    2.43
   6  -3  11   -1.79    1.24
   7  -3  12    5.34    2.60
   8  -3  13    0.13    2.09
   9  -3  14  254.32   14.83
  10  -3  15   -0.65    2.32
  11  -3  16   72.85    7.35
  12  -3  17   -2.05    2.23
  13  -3  18   35.95    5.73
  18   3  14   48.71    6.58
  17   3  13    0.76    1.95
  16   3  12   -0.91    1.82
  15   3  11    0.90    1.88
  14   3  10  311.56   16.76
  13   3   9    0.81    1.97
  12   3   8  437.38   21.22
  11   3   7    0.04    1.47
  10   3   6  212.40   11.64
   9   3   5    1.07    1.19
   8   3   4    6.69    1.87
   8   3   4    6.52    1.25
   7   3   3   -0.78    0.92
   7   3   3   -0.09    0.62
  -7  -3  -3   -0.36    0.83
  -6  -3  -2 1444.88   58.00
   6   3   2 1376.28   57.81
   6   3   2 1442.90   57.27
  -5  -3  -1   -0.03    0.60
   5   3   1    0.63    0.98
   5   3   1   -1.15    0.94
   4   3   0 1643.92   66.05
   4   3   0 1606.88   64.64
  -4  -3   0 1611.39   65.41
   3   3  -1   -0.78    0.65
   3   3  -1   -0.79    0.75
  -3  -3   1    0.09    0.41
  -2  -3   2  417.40   17.40
   2   3  -2  448.86   18.83
   2   3  -2  397.64   18.39
   1   3  -3   -1.21    0.75
   1   3  -3   -0.17    0.78
   0   3  -4  664.19   28.06
   0   3  -4  668.03   28.68
   1  -3   5   -1.45    0.75
   1  -3   5   -0.34    0.76
   2  -3   6 2738.78  101.68
   2  -3   6 2735.33  107.66
   3  -3   7   -0.86    0.82
   4  -3   8  297.73   14.44
   5  -3   9    0.36    1.24
   6  -3  10   22.79    3.68
   7  -3  11    1.32    2.00
   8  -3  12  289.24   15.55
   9  -3  13   -2.32    1.94
  10  -3  14  100.94    8.30
  11  -3  15   -1.83    2.40
  12  -3  16   88.87    8.17
  13  -3  17   -0.31    1.90
  14  -3  18    4.54    2.80
  17   3  14   63.70    6.65
  16   3  13    0.23    2.00
  15   3  12   -0.07    1.85
  14   3  11   -2.12    1.47
  13   3  10  568.80   26.77
  12   3   9   -1.37    1.31
  11   3   8    3.00    2.07
  10   3   7    1.09    1.44
   9   3   6    4.09    1.93
   8   3   5    0.52    1.04
  -8  -3  -5   -0.72    0.71
  -7  -3  -4  149.71    7.95
   7   3   4  154.34    7.30
   7   3   4  149.51    8.55
  -6  -3  -3   -0.95    0.75
   6   3   3   -1.94    1.00
   6   3   3   -0.16    0.72
  -5  -3  -2 1230.81   50.70
   5   3   2 1262.75   50.22
   5   3   2 1229.87   50.60
  -4  -3  -1    0.06    0.61
   4   3   1    0.65    0.90
   4   3   1   -0.56    0.69
   3   3   0   18.18    2.38
   3   3   0   14.24    1.95
  -3  -3   0   16.85    1.49
   2   3  -1    0.13    0.43
   2   3  -1   -0.97    0.43
  -2  -3   1   -0.03    0.38
   1   3  -2  441.03   18.82
   1   3  -2  407.94   18.48
   0   3  -3   -0.51    0.67
   1  -3   4  734.85   29.77
   1  -3   4  786.48   31.69
   2  -3   5    0.31    1.10
   2  -3   5   -0.46    0.84
   3  -3   6  268.35   12.93
   4  -3   7    4.37    1.63
   5  -3   8    1.02    1.37
   6  -3   9    0.26    1.28
   7  -3  10  167.40   10.08
   8  -3  11    1.33    1.76
   9  -3  12   12.12    3.53
  10  -3  13    0.50    2.23
  11  -3  14   20.29    4.68
  12  -3  15    0.04    2.50
  13  -3  16    0.89    2.49
  14  -3  17    0.30    2.17
  17   3  15    2.01    1.97
  16   3  14   11.80    3.63
  15   3  13   -2.77    1.37
  14   3  12    7.80    2.94
  13   3  11    3.75    2.38
  12   3  10   16.09    3.67
  11   3   9   -1.59    1.49
  10   3   8   83.13    6.46
   9   3   7   -0.64    1.22
  -8  -3  -6   65.73    4.98
   8   3   6   92.57    6.00
   7   3   5   -0.60    0.88
  -7  -3  -5    0.89    1.04
   7   3   5    0.49    0.49
   6   3   4  197.91   10.16
   6   3   4  188.96    8.79
  -6  -3  -4  196.64    9.67
   5   3   3    1.02    0.68
   5   3   3   -0.60    0.98
  -5  -3  -3   -0.53    0.86
   4   3   2  429.78   19.75
  -4  -3  -2  471.99   19.58
   4   3   2  457.53   19.39
   3   3   1   -0.52    0.60
   3   3   1    0.43    0.78
  -3  -3  -1    0.34    0.64
   2   3   0  107.87    5.81
   2   3   0  106.34    6.08
  -2  -3   0  109.87    5.26
   1   3  -1    0.76    0.85
   0   3  -2   20.39    2.51
  -1   3  -3    0.26    0.71
   2  -3   4 1451.28   54.92
   2  -3   4 1453.98   58.11
   3  -3   5   -1.09    0.91
   3  -3   5    1.48    1.10
   4  -3   6  110.83    6.63
   5  -3   7    3.39    1.38
   6  -3   8  359.01   17.12
   7  -3   9   -1.48    1.39
   8  -3  10  242.22   13.26
   9  -3  11   -2.18    1.76
  10  -3  12   62.49    6.24
  11  -3  13   -1.90    1.72
  12  -3  14   25.81    5.03
  13  -3  15   -0.71    1.77
  14  -3  16   -0.31    2.20
  15  -3  17    1.25    2.28
  16   3  15    2.64    1.85
  15   3  14   17.77    4.03
  14   3  13    2.45    2.18
  13   3  12  111.24    8.59
  12   3  11    3.04    2.12
  11   3  10    5.86    2.57
  10   3   9   -0.66    1.46
   9   3   8  453.96   21.74
  -9  -3  -8  486.10   21.87
  -8  -3  -7   -0.29    1.19
   8   3   7    0.48    1.12
   7   3   6   30.91    3.23
  -7  -3  -6   30.34    3.13
   6   3   5    1.02    0.47
  -6  -3  -5    0.32    0.83
   6   3   5   -0.22    1.07
  -5  -3  -4 3002.39  119.92
   5   3   4 2915.46  118.67
   5   3   4 2992.32  116.61
  -4  -3  -3   -1.06    0.76
   4   3   3    0.40    0.61
   4   3   3    2.31    1.12
  -3  -3  -2   24.80    2.22
   3   3   2   25.68    2.93
   3   3   2   29.14    2.22
  -2  -3  -1    1.23    0.71
   2   3   1    2.77    1.08
   1   3   0   15.50    2.20
  -1  -3   0   20.29    1.67
   0   3  -1   -0.61    0.57
  -1   3  -2   20.62    2.48
   2  -3   3    4.04    1.23
   3  -3   4 2061.51   76.34
   3  -3   4 2027.31   80.75
   4  -3   5    0.48    1.10
   5  -3   6   14.59    2.53
   6  -3   7    1.21    1.35
   7  -3   8  200.29   10.99
   8  -3   9   -1.10    1.37
   9  -3  10   52.56    5.13
  10  -3  11   -1.01    1.83
  11  -3  12  484.72   23.76
  12  -3  13    1.07    2.48
  13  -3  14   14.04    3.83
  14  -3  15    0.83    2.78
  15  -3  16   62.03    7.70
  16   3  16   20.59    4.30
  15   3  15   -2.19    1.59
  14   3  14    1.79    2.15
  13   3  13    0.70    1.89
  12   3  12  144.89    9.89
  11   3  11   -0.82    1.40
  10   3  10  536.07   24.90
   9   3   9    1.19    1.41
  -9  -3  -9   -0.92    1.01
   8   3   8  100.83    6.69
  -8  -3  -8   85.50    6.16
  -7  -3  -7    0.09    1.03
   7   3   7    1.70    1.17
  -6  -3  -6  813.76   33.66
   6   3   6  752.21   33.09
   5   3   5    0.45    0.39
   5   3   5    2.85    1.27
  -5  -3  -5   -0.78    0.90
  -4  -3  -4  381.35   17.57
   4   3   4  411.91   16.60
   4   3   4  389.54   17.63
   3   3   3   -0.37    0.74
  -3  -3  -3    0.37    0.82
  -2  -3  -2 1788.98   73.32
   2   3   2 1832.72   71.65
  -1  -3  -1    0.24    0.58
   1   3   1    0.29    0.72
   0   3   0   -0.20    0.68
  -1   3  -1   -0.68    0.55
  -2   3  -2 1770.78   70.13
   3  -3   3    0.72    1.06
   3  -3   3   -1.01    0.76
   4  -3   4  389.91   17.35
   5  -3   5   -0.47    1.05
   6  -3   6  762.38   32.28
   7  -3   7   -1.28    1.20
   8  -3   8  102.71    7.15
   9  -3   9   -1.44    1.39
  10  -3  10  513.06   24.18
  11  -3  11   -1.68    1.98
  12  -3  12  160.97   10.84
  13  -3  13   -0.01    2.02
  14  -3  14    0.85    2.18
  15  -3  15   -2.63    1.67
  16  -3  16   19.49    5.09
  15   3  16   61.38    7.31
  14   3  15    0.27    1.48
  13   3  14    9.71    3.35
  12   3  13    3.19    2.38
  11   3  12  453.35   22.23
  10   3  11   -1.12    1.33
  -9  -3 -10   18.11    3.17
   9   3  10   23.83    3.90
  -8  -3  -9    0.13    1.10
   8   3   9   -0.27    0.83
  -7  -3  -8  206.12   10.91
   7   3   8  200.49   11.04
  -6  -3  -7    0.19    1.18
   6   3   7    0.33    1.23
  -5  -3  -6   20.71    2.69
   5   3   6   19.12    2.89
  -4  -3  -5   -1.11    0.84
   4   3   5    0.07    0.92
  -3  -3  -4 2025.77   82.55
   3   3   4 2036.91   80.29
   2   3   3   -0.30    0.79
  -2  -3  -3   -0.80    0.63
  -1  -3  -2   16.50    1.82
   1   3   2   17.60    2.29
   0   3   1   -0.63    0.66
  -1   3   0   19.89    2.16
  -2   3  -1    3.43    1.17
   3  -3   2   25.48    2.39
   3  -3   2   25.91    2.56
   4  -3   3    5.63    1.46
   5  -3   4 2920.31  114.45
   6  -3   5   -0.40    1.17
   7  -3   6   27.38    3.47
   8  -3   7    0.63    1.42
   9  -3   8  460.52   21.62
  10  -3   9    0.42    1.57
  11  -3  10    4.99    2.78
  12  -3  11    0.23    2.03
  13  -3  12  104.69    8.33
  14  -3  13    1.65    2.54
  15  -3  14   16.80    4.28
  16  -3  15    0.05    2.14
  16  -3  15   -1.92    1.98
  15   3  17    1.48    1.56
  14   3  16    3.68    2.29
  13   3  15   16.37    3.93
  12   3  14   26.92    4.95
  11   3  13    3.00    2.01
  10   3  12   58.49    5.62
  -9  -3 -11   -0.82    1.34
   9   3  11   -1.88    1.49
   8   3  10  260.61   13.72
  -8  -3 -10  260.08   13.84
   7   3   9   -1.26    1.11
  -7  -3  -9    1.37    1.23
  -6  -3  -8  360.73   17.15
   6   3   8  359.62   17.10
   5   3   7    2.98    1.32
  -5  -3  -7   -1.95    0.92
  -4  -3  -6  110.17    6.50
   4   3   6  106.80    6.49
   3   3   5    2.01    1.13
  -3  -3  -5    0.35    0.78
  -2  -3  -4 1436.04   58.71
   2   3   4 1424.28   57.08
  -1  -3  -3   -1.52    0.63
   1   3   3   -0.64    0.47
   0   3   2   15.83    2.12
   0  -3  -2   15.58    1.81
  -1   3   1    5.29    1.27
  -2   3   0  109.92    6.00
  -3   3  -1    0.65    0.75
   4  -3   2  460.08   19.85
   4  -3   2  460.65   18.75
   5  -3   3    0.69    1.02
   6  -3   4  170.79    8.95
   7  -3   5    1.16    1.45
   8  -3   6   80.56    5.78
   9  -3   7    0.54    1.46
  10  -3   8   95.02    6.88
  11  -3   9   -1.67    1.77
  12  -3  10   14.66    3.62
  13  -3  11    0.50    2.23
  14  -3  12    7.35    3.38
  15  -3  13    0.81    2.55
  16  -3  14   11.93    3.87
  16  -3  14    6.15    2.54
  17  -3  15   -0.37    2.11
  17  -3  15    1.10    2.25
  14   3  17    0.72    1.64
  13   3  16    1.37    2.16
  12   3  15    2.15    2.32
  11   3  14   11.34    3.57
  10   3  13   -3.71    1.19
   9   3  12   21.56    3.98
  -9  -3 -12   14.29    3.37
  -8  -3 -11    1.56    1.65
   8   3  11    0.03    1.39
  -7  -3 -10  176.37   10.00
   7   3  10  159.59    9.68
  -6  -3  -9   -0.34    1.00
   6   3   9   -0.48    1.05
  -5  -3  -8   -0.40    1.06
   5   3   8    0.26    1.00
  -4  -3  -7    1.27    1.26
   4   3   7   -0.01    1.01
  -3  -3  -6  285.39   13.58
   3   3   6  282.30   13.36
  -2  -3  -5    0.98    1.04
   2   3   5   -1.92    0.62
   1   3   4  709.29   28.74
  -1  -3  -4  675.77   29.33
   0  -3  -3   -0.99    0.54
   0   3   3   -0.73    0.67
  -1   3   2  391.82   16.94
  -2   3   1    5.88    1.23
  -3   3   0    1.24    0.62
   5  -3   2 1148.38   44.00
   5  -3   2 1168.49   46.61
   6  -3   3   -0.97    0.80
   7  -3   4  130.83    7.47
   8  -3   5    0.48    1.34
   9  -3   6    7.88    2.26
  10  -3   7    1.24    1.56
  11  -3   8    0.00    1.70
  12  -3   9   -1.41    1.88
  13  -3  10  630.83   29.30
  14  -3  11    1.52    2.44
  15  -3  12    1.82    2.56
  15  -3  12    1.40    1.85
  16  -3  13   -0.04    2.23
  16  -3  13    1.50    2.03
  17  -3  14   71.03    7.50
  17  -3  14   68.01    6.85
  14   3  18    4.42    2.36
  13   3  17   -0.95    1.77
  12   3  16   99.71    8.58
  11   3  15    0.12    1.83
  10   3  14  102.81    8.17
   9   3  13   -0.88    1.75
  -9  -3 -13    3.91    2.43
   8   3  12  269.62   14.49
  -8  -3 -12  267.37   14.66
  -7  -3 -11   -0.22    1.28
   7   3  11   -0.14    1.32
   6   3  10   29.58    3.91
  -6  -3 -10   26.88    3.72
   5   3   9    0.74    0.75
  -5  -3  -9    0.69    1.31
   4   3   8  336.02   15.88
  -4  -3  -8  333.74   16.16
  -3  -3  -7    0.20    1.14
   3   3   7    0.74    1.20
  -2  -3  -6 2621.21  105.43
   2   3   6 2725.84  103.78
  -2  -3  -6 2579.52  107.29
   1   3   5    1.08    0.97
  -1  -3  -5    0.59    0.87
   0   3   4  626.51   25.44
   0  -3  -4  593.50   25.99
   1  -3  -3   -0.48    0.69
  -1   3   3   -0.05    0.39
  -2   3   2    0.83    0.49
  -3   3   1    0.16    0.46
  -4   3   0 1118.23   44.83
   5  -3   1    0.56    0.97
   5  -3   1    1.73    1.18
   6  -3   2 1338.16   53.53
   7  -3   3   -1.86    0.84
   8  -3   4    4.98    1.86
   9  -3   5    0.75    1.56
  10  -3   6  224.86   12.01
  11  -3   7    1.59    1.77
  12  -3   8  448.16   21.52
  13  -3   9    0.11    2.05
  14  -3  10  350.96   18.50
  15  -3  11   -0.47    1.70
  15  -3  11    1.22    2.23
  16  -3  12   -0.55    1.91
  16  -3  12    0.77    1.80
  17  -3  13   -1.57    1.88
  17  -3  13   -1.43    1.47
  18  -3  14   52.30    6.78
  18  -3  14   56.50    7.41
  13   3  18   38.70    6.08
  12   3  17   -0.60    1.78
  11   3  16   78.67    7.38
  10   3  15   -0.96    1.80
   9   3  14  222.60   13.15
  -9  -3 -14  209.38   12.83
   8   3  13   -0.43    1.43
  -8  -3 -13   -0.95    1.65
  -7  -3 -12    3.46    2.14
   7   3  12    7.43    2.66
   6   3  11    0.71    1.03
  -6  -3 -11    0.17    1.33
  -5  -3 -10    8.10    2.27
   5   3  10    5.02    1.79
  -4  -3  -9   -1.25    1.00
   4   3   9    1.18    1.18
  -3  -3  -8 1388.65   57.53
   3   3   8 1357.65   55.57
  -2  -3  -7    0.09    1.15
   2   3   7   -0.78    0.76
   1   3   6 2291.76   90.56
  -1  -3  -6 2282.38   93.77
  -1  -3  -6 2334.58   92.09
   0   3   5    0.43    0.40
   0  -3  -5   -0.27    0.87
  -2   3   3   -0.40    0.57
  -3   3   2  712.84   29.10
   5  -3   0  817.52   32.95
   5  -3   0  801.15   31.14
   6  -3   1   -0.42    0.93
   7  -3   2 1427.08   57.04
   8  -3   3   -0.03    1.02
   9  -3   4   92.41    6.16
  10  -3   5    1.67    1.79
  11  -3   6  101.33    7.00
  12  -3   7    1.18    1.83
  13  -3   8    3.34    2.41
  14  -3   9   -1.46    1.96
  14  -3   9    2.25    1.88
  15  -3  10  359.33   19.45
  15  -3  10  385.76   19.79
  16  -3  11   -0.53    1.92
  16  -3  11    1.30    2.29
  17  -3  12    1.43    1.91
  17  -3  12   -0.71    1.93
  18  -3  13    1.29    2.31
  18  -3  13   -0.74    2.02
  12   3  18   11.69    3.89
  11   3  17   -1.25    2.00
  10   3  16    7.09    2.98
   9   3  15    0.94    1.88
  -9  -3 -15    1.64    2.13
   8   3  14 1045.39   46.30
  -8  -3 -14 1094.04   47.60
  -7  -3 -13   -1.49    1.68
   7   3  13    0.89    1.87
  -6  -3 -12  422.84   20.38
   6   3  12  407.01   19.87
  -5  -3 -11    1.87    1.56
   5   3  11   -1.37    0.90
   4   3  10   27.27    3.53
  -4  -3 -10   33.80    3.90
   3   3   9   -0.21    0.97
  -3  -3  -9    0.26    1.33
   2   3   8  692.04   29.26
  -2  -3  -8  693.04   30.27
   1   3   7    2.44    1.12
  -1  -3  -7   -0.31    1.05
   0  -3  -6    2.66    0.90
   0   3   6   -0.05    0.29
   0  -3  -6    0.15    1.21
   1  -3  -5   -0.76    0.81
  -1   3   5   -1.40    0.48
   1  -3  -5   -0.95    0.71
  -2   3   4  869.23   35.07
  -3   3   3    0.99    0.72
  -4   3   2   32.47    2.57
   6  -3   0  300.73   13.19
   6  -3   0  289.48   12.42
   7  -3   1    1.78    1.07
   8  -3   2   53.20    4.00
   9  -3   3    0.78    1.23
  10  -3   4   88.21    6.10
  11  -3   5   -0.46    1.17
  12  -3   6   17.20    3.42
  13  -3   7   -0.80    1.53
  13  -3   7    0.52    1.89
  14  -3   8   49.81    5.69
  14  -3   8   48.53    5.25
  15  -3   9   -1.46    1.86
  15  -3   9   -0.36    1.77
  16  -3  10   48.93    5.96
  16  -3  10   41.75    5.83
  17  -3  11    0.55    2.29
  17  -3  11   -2.78    1.68
  18  -3  12   28.17    5.54
  18  -3  12   25.44    4.94
  19  -3  13    1.04    2.08
  12   3  19    0.65    1.72
  11   3  18   27.86    5.33
  10   3  17   -1.53    1.63
  -9  -3 -16   13.48    3.68
   9   3  16   14.73    3.44
  -8  -3 -15   -2.66    1.96
   8   3  15   -0.27    2.03
   7   3  14  551.57   26.04
  -7  -3 -14  545.83   26.35
   6   3  13    0.73    1.59
  -6  -3 -13   -0.13    1.72
   5   3  12   42.41    4.17
  -5  -3 -12   39.92    4.66
   4   3  11   -1.64    0.82
  -4  -3 -11    1.37    1.57
   3   3  10   72.43    5.24
  -3  -3 -10   68.08    5.37
  -2  -3  -9    2.04    1.37
   2   3   9    0.60    1.13
  -1  -3  -8   99.41    6.40
   0  -3  -7    0.17    0.70
   0   3   7    0.17    0.43
   0  -3  -7   -0.15    1.05
   1  -3  -6 2528.03   97.61
  -1   3   6 2411.35   95.15
   1  -3  -6 2355.66   98.84
  -2   3   5   -0.20    0.64
   2  -3  -5    0.25    0.87
   2  -3  -5   -0.34    0.81
   3  -3  -4   96.24    5.28
  -3   3   4   94.60    5.17
  -4   3   3    0.00    0.55
   4  -3  -3    1.40    1.04
  -5   3   2   21.84    2.05
   6  -3  -1    5.11    1.29
   6  -3  -1    2.17    0.99
   7  -3   0   54.63    3.77
   8  -3   1   -0.88    0.76
   9  -3   2  396.38   17.75
  10  -3   3   -1.24    1.21
  11  -3   4   43.16    4.24
  12  -3   5    1.08    1.38
  12  -3   5    1.23    1.54
  13  -3   6   35.38    4.49
  13  -3   6   27.04    4.26
  14  -3   7    0.65    2.12
  14  -3   7    0.16    1.62
  15  -3   8  208.33   12.34
  15  -3   8  186.53   11.82
  16  -3   9   -0.13    2.08
  16  -3   9    0.82    2.23
  17  -3  10   55.01    6.76
  17  -3  10   60.15    6.76
  18  -3  11   -3.53    1.93
  18  -3  11    3.45    2.20
  19  -3  12    4.10    2.70
  19  -3  12    5.95    3.15
  11   3  19    0.68    2.07
  10   3  18   20.84    5.05
  -9  -3 -17    0.95    2.21
   9   3  17   -0.96    1.90
   8   3  16  135.50    9.82
  -8  -3 -16  127.17    9.76
   7   3  15   -0.28    1.90
  -7  -3 -15    2.13    2.24
  -6  -3 -14  187.70   11.68
   6   3  14  202.18   11.88
   5   3  13    0.86    1.48
  -5  -3 -13   -0.36    1.66
   4   3  12  281.44   14.25
  -4  -3 -12  277.02   14.69
  -3  -3 -11   -2.27    0.99
   3   3  11    1.11    1.02
  -2  -3 -10  149.14    8.87
   2   3  10  156.18    8.60
  -1  -3  -9    0.11    1.28
   1   3   9    0.06    0.51
   0  -3  -8  234.14   11.32
   0   3   8  212.51   10.43
   0  -3  -8  207.02    9.51
   1  -3  -7   -0.72    0.77
  -1   3   7   -0.10    0.63
   1  -3  -7    0.93    1.22
   2  -3  -6  305.10   13.50
   2  -3  -6  300.94   14.36
  -2   3   6  310.44   13.56
   3  -3  -5    1.32    1.02
  -3   3   5   -0.14    0.53
  -4   3   4   51.58    3.38
   4  -3  -4   52.30    3.67
   5  -3  -3   -0.51    0.96
  -5   3   3   -0.05    0.76
   6  -3  -2 1120.66   47.43
   6  -3  -2 1137.37   42.91
   6  -3  -2 1164.28   45.44
   7  -3  -1    0.41    1.19
   7  -3  -1    0.53    0.90
   8  -3   0  328.18   14.49
   8  -3   0  324.24   15.63
   9  -3   1    2.43    1.64
  10  -3   2  166.93    8.93
  10  -3   2  163.18    9.50
  11  -3   3   -0.77    1.08
  11  -3   3   -0.88    1.27
  12  -3   4  210.17   12.02
  12  -3   4  218.68   11.54
  13  -3   5   -0.39    1.39
  13  -3   5    1.05    1.75
  14  -3   6  617.60   28.19
  14  -3   6  630.74   29.25
  15  -3   7   -0.98    1.69
  15  -3   7   -1.37    1.69
  16  -3   8  123.56    9.20
  16  -3   8  129.60    9.17
  17  -3   9   -0.44    2.04
  17  -3   9   -2.16    1.66
  18  -3  10   11.01    3.78
  18  -3  10    4.06    2.64
  19  -3  11    6.23    3.02
  19  -3  11    1.40    2.26
  11   3  20   24.87    5.03
  10   3  19   -0.94    2.02
  -9  -3 -18  430.43   22.49
   9   3  18  411.02   22.23
  -8  -3 -17   -2.61    1.96
   8   3  17    0.81    2.10
  -7  -3 -16 1142.93   51.05
   7   3  16 1156.65   49.93
   6   3  15   -0.58    1.44
  -6  -3 -15   -0.11    1.81
  -5  -3 -14   45.90    5.11
   5   3  14   58.53    5.45
   4   3  13    0.61    1.15
  -4  -3 -13    0.77    1.79
   3   3  12   20.63    3.27
  -3  -3 -12   16.76    3.23
  -2  -3 -11    0.89    1.29
   2   3  11    2.08    1.27
   0   3   9    0.55    0.87
   0  -3  -9    0.31    1.24
  -1   3   8 2946.51  116.79
   1  -3  -8 3087.25  119.81
   1  -3  -8 2939.52  121.60
   2  -3  -7    0.03    0.93
  -2   3   7   -0.06    0.67
   2  -3  -7    0.99    0.87
  -3   3   6   71.58    4.23
   3  -3  -6   66.09    4.24
   3  -3  -6   73.32    4.88
   4  -3  -5   -0.78    0.96
  -4   3   5   -0.44    0.64
   5  -3  -4  439.36   19.64
  -5   3   4  450.80   18.59
  -6   3   3   -0.15    0.64
   6  -3  -3    1.47    1.18
   7  -3  -2 1758.03   68.70
   7  -3  -2 1731.24   64.91
   7  -3  -2 1758.19   71.77
   8  -3  -1    0.48    1.01
   8  -3  -1    0.38    1.44
   9  -3   0 2243.84   87.33
   9  -3   0 2194.46   90.94
  10  -3   1   -0.53    0.99
  10  -3   1    2.74    1.57
  11  -3   2   -0.65    1.30
  11  -3   2   -0.87    1.29
  12  -3   3    0.82    1.34
  12  -3   3   -0.95    1.44
  13  -3   4   70.95    5.72
  13  -3   4   78.41    6.30
  14  -3   5    3.26    2.16
  14  -3   5    0.13    1.76
  15  -3   6   66.88    6.12
  15  -3   6   79.90    6.78
  16  -3   7    1.59    2.13
  16  -3   7    0.20    1.67
  17  -3   8  423.38   21.11
  17  -3   8  400.79   21.56
  18  -3   9    1.01    2.23
  18  -3   9   -1.26    2.00
  19  -3  10   70.44    7.87
  19  -3  10   65.63    7.66
  20  -3  11    4.67    2.83
  10   3  20    2.27    2.21
   9   3  19    0.64    2.10
  -9  -3 -19    0.90    2.21
   8   3  18  226.92   14.52
  -8  -3 -18  251.96   15.15
  -7  -3 -17   -0.67    2.32
   7   3  17    0.12    2.08
   6   3  16    6.58    2.87
  -6  -3 -16   11.98    3.54
   5   3  15   -1.71    1.51
  -5  -3 -15    0.19    1.71
  -4  -3 -14  210.88   12.45
   4   3  14  214.81   12.18
   3   3  13   -0.25    1.19
  -3  -3 -13   -1.05    1.41
  -2  -3 -12   24.24    3.84
   2   3  12   35.78    3.42
  -1  -3 -11   -0.69    1.19
   1   3  11    0.05    0.54
   0  -3 -10  606.40   27.01
   0   3  10  591.67   25.60
   1  -3  -9    0.65    1.00
  -1   3   9    0.94    0.90
   1  -3  -9    0.26    1.35
  -2   3   8 1402.59   56.41
   2  -3  -8 1397.43   59.12
   2  -3  -8 1459.60   57.84
   3  -3  -7    0.04    1.09
   3  -3  -7    0.11    0.91
  -3   3   7    0.41    0.65
   4  -3  -6  322.83   14.89
  -4   3   6  338.80   14.24
   5  -3  -5    1.15    1.05
  -5   3   5   -0.45    0.47
   6  -3  -4  230.87   11.47
  -6   3   4  239.80   10.45
   7  -3  -3   -0.96    0.82
   7  -3  -3   -0.53    0.68
   7  -3  -3    0.83    1.42
   8  -3  -2  656.16   28.92
   8  -3  -2  665.97   27.04
   9  -3  -1    1.93    1.77
   9  -3  -1    0.96    1.08
  10  -3   0  198.34   10.77
  10  -3   0  193.78    9.67
  11  -3   1    0.26    1.27
  11  -3   1    0.45    1.51
  12  -3   2   22.01    3.14
  12  -3   2   18.05    3.31
  13  -3   3   -0.67    1.54
  13  -3   3   -0.90    1.63
  14  -3   4  166.98    9.79
  14  -3   4  167.05   10.55
  15  -3   5    0.93    1.97
  15  -3   5   -0.70    1.67
  16  -3   6  382.53   20.32
  16  -3   6  396.28   19.45
  17  -3   7    3.21    2.26
  17  -3   7    0.51    2.50
  18  -3   8    0.28    2.38
  18  -3   8    1.46    2.23
  19  -3   9   -0.39    2.30
  20  -3  10    2.07    2.45
   9   3  20  134.32   10.62
  -9  -3 -20  142.84   10.73
  -8  -3 -19   -0.08    2.43
   8   3  19    0.11    1.67
   7   3  18   18.47    4.27
  -7  -3 -18   27.49    5.20
  -6  -3 -17   -2.60    2.14
   6   3  17    1.70    2.17
   5   3  16  633.84   28.67
  -5  -3 -16  581.05   28.82
  -4  -3 -15   -1.57    1.53
   4   3  15   -0.05    1.61
   3   3  14  196.99   10.93
  -3  -3 -14  171.81   11.05
  -2  -3 -13   -0.48    1.50
   2   3  13    0.24    0.96
   0  -3 -11   -0.67    1.31
   0   3  11    1.72    1.28
   1  -3 -10    2.51    1.43
  -1   3  10    1.64    1.00
  -2   3   9    0.90    0.82
   2  -3  -9    1.00    1.26
   2  -3  -9    0.28    1.17
  -3   3   8  386.49   16.52
   3  -3  -8  383.38   17.95
   4  -3  -7   -2.26    0.80
   4  -3  -7   -0.68    1.13
  -4   3   7   -0.28    0.54
   5  -3  -6    5.86    1.66
  -5   3   6    6.11    1.15
   6  -3  -5    1.06    1.28
  -6   3   5   -0.09    0.43
   7  -3  -4    6.91    2.05
   7  -3  -4    6.11    1.18
   7  -3  -4    5.20    1.16
   8  -3  -3    0.09    1.42
   8  -3  -3    0.00    0.66
   9  -3  -2   40.23    2.99
   9  -3  -2   38.41    3.93
  10  -3  -1    2.33    1.55
  10  -3  -1    0.35    1.15
  11  -3   0  578.02   26.66
  11  -3   0  589.46   24.87
  12  -3   1   -1.02    1.28
  12  -3   1   -0.05    1.28
  13  -3   2    0.92    1.83
  13  -3   2   -0.25    1.63
  14  -3   3    0.63    1.65
  14  -3   3    1.87    1.99
  15  -3   4    5.70    2.64
  15  -3   4    9.53    2.77
  16  -3   5   -1.22    1.43
  16  -3   5   -0.81    2.00
  17  -3   6   47.58    6.07
  18  -3   7    0.37    2.13
  19  -3   8   34.21    5.55
  20  -3   9    0.36    2.33
   9   3  21   -0.68    2.02
  -9  -3 -21    3.11    2.17
  -8  -3 -20    9.76    3.33
   8   3  20    9.18    3.36
  -7  -3 -19   -0.70    2.05
   7   3  19   -1.86    1.84
   6   3  18    2.73    2.56
  -6  -3 -18    3.00    2.74
  -5  -3 -17   -1.01    2.02
   5   3  17    1.16    1.82
   4   3  16  236.67   13.62
  -4  -3 -16  236.62   13.81
  -3  -3 -15    0.16    1.81
   3   3  15    1.07    1.44
  -2  -3 -14  162.45    9.92
   2   3  14  134.05    8.74
  -1  -3 -13    0.37    1.52
   1   3  13    0.43    0.86
   0   3  12   34.19    3.41
   0  -3 -12   34.00    4.24
  -1   3  11    1.02    1.10
   1  -3 -11    0.62    1.38
   2  -3 -10   50.80    3.85
  -2   3  10   66.38    4.27
   2  -3 -10   70.15    5.18
   3  -3  -9   -0.61    0.98
   3  -3  -9    0.64    1.35
  -3   3   9    1.18    0.83
   4  -3  -8    0.52    1.38
   4  -3  -8    0.47    1.28
  -4   3   8    0.81    0.66
  -5   3   7    0.38    0.62
   5  -3  -7   -0.55    1.02
   6  -3  -6 1333.90   54.46
  -6   3   6 1296.02   51.70
   7  -3  -5   -1.27    1.22
  -7   3   5    0.73    0.57
   8  -3  -4  377.87   15.18
   8  -3  -4  391.28   16.11
   8  -3  -4  384.25   17.94
   9  -3  -3   -1.16    1.26
   9  -3  -3    0.15    0.67
  10  -3  -2  197.90   10.86
  10  -3  -2  197.59    9.38
  11  -3  -1    5.39    1.65
  11  -3  -1   10.68    2.54
  12  -3   0    4.07    1.96
  12  -3   0    0.00    1.67
  13  -3   1   -0.47    1.63
  13  -3   1    1.72    1.64
  14  -3   2   95.10    7.37
  14  -3   2   98.58    6.61
  15  -3   3   -0.61    1.62
  16  -3   4  454.51   22.95
  17  -3   5   -1.46    1.84
  18  -3   6   -1.08    1.96
  19  -3   7    0.09    1.93
  20  -3   8   46.36    6.59
  21  -3   9    2.29    2.34
   8   3  21    1.81    2.19
  -8  -3 -21    0.45    1.86
   7   3  20   82.21    7.60
  -7  -3 -20   72.35    7.44
   6   3  19    0.64    1.75
  -6  -3 -19    2.14    2.32
   5   3  18  278.66   15.60
  -5  -3 -18  265.21   15.81
  -4  -3 -17    2.15    2.38
   4   3  17    1.46    1.60
   3   3  16   34.74    4.77
  -3  -3 -16   32.74    4.93
  -2  -3 -15    0.24    2.00
   2   3  15   -0.94    0.64
   1   3  14  301.96   14.91
  -1  -3 -14  296.43   15.99
   0   3  13   -0.96    0.96
   0  -3 -13   -0.30    1.41
   1  -3 -12  997.59   43.45
  -1   3  12 1000.08   41.22
  -2   3  11    1.32    0.92
   2  -3 -11    0.53    1.50
   3  -3 -10 1653.17   69.37
  -3   3  10 1674.61   65.86
   4  -3  -9    0.40    1.43
   4  -3  -9   -0.38    0.92
  -4   3   9    0.22    0.56
   5  -3  -8    2.38    1.29
  -5   3   8    2.10    0.97
   5  -3  -8    4.43    1.83
   6  -3  -7    0.44    1.45
  -6   3   7    0.00    0.44
   7  -3  -6  344.69   16.07
  -7   3   6  336.96   14.23
   8  -3  -5   -0.46    0.72
   8  -3  -5    1.10    1.56
   8  -3  -5   -0.30    0.66
   9  -3  -4  148.91    7.07
   9  -3  -4  151.48    8.73
  10  -3  -3    0.48    1.40
  11  -3  -2 1090.16   46.77
  12  -3  -1   -0.06    1.51
  13  -3   0  142.44    9.26
  14  -3   1    2.60    2.10
  15  -3   2  221.84   13.08
  16  -3   3   -1.01    1.83
  17  -3   4  251.31   14.83
  18  -3   5    1.60    2.65
  19  -3   6  194.49   12.81
  20  -3   7   -1.03    1.87
  21  -3   8   44.33    6.54
  -7  -3 -21    0.86    2.05
   7   3  21    0.19    1.98
   6   3  20   66.73    6.89
  -6  -3 -20   76.32    7.45
   5   3  19    0.28    2.02
  -5  -3 -19    2.97    2.43
  -4  -3 -18  765.55   35.81
   4   3  18  765.86   34.88
  -3  -3 -17   -0.81    1.79
   3   3  17    1.72    1.97
   1   3  15   -0.07    1.04
  -1  -3 -15   -1.99    1.66
   0   3  14  726.50   29.76
   0  -3 -14  637.74   31.03
  -1   3  13    1.38    1.01
   1  -3 -13    2.50    1.74
  -2   3  12  406.97   17.99
   2  -3 -12  392.63   19.41
   3  -3 -11   -0.58    1.43
  -3   3  11    0.04    0.95
  -4   3  10  965.13   38.17
   4  -3 -10  954.26   40.95
   4  -3 -10  919.65   39.80
   5  -3  -9   -0.39    0.97
   5  -3  -9    0.39    1.71
  -5   3   9    1.05    0.65
   6  -3  -8    0.03    1.63
  -6   3   8    0.59    0.49
   7  -3  -7   -0.99    1.30
   8  -3  -6  692.41   30.28
   9  -3  -5   -0.30    1.40
  10  -3  -4 1439.04   60.26
  12  -3  -2  235.33   12.81
  13  -3  -1    9.08    2.74
  14  -3   0    8.23    2.97
  15  -3   1    0.55    2.00
  16  -3   2  134.80    9.46
  17  -3   3    0.21    1.84
  18  -3   4   22.89    4.70
  19  -3   5   -1.89    2.01
  20  -3   6   91.82    8.30
  21  -3   7    1.36    2.39
  -7  -3 -22   69.55    8.17
   6   3  21    0.86    1.96
  -6  -3 -21   -1.37    1.94
   5   3  20  211.33   13.53
  -5  -3 -20  225.75   14.18
   4   3  19   -1.21    1.50
  -4  -3 -19    2.98    2.62
  -3  -3 -18   40.16    5.70
   3   3  18   42.96    5.30
   2   3  17   -0.01    0.96
  -2  -3 -17   -0.32    1.79
  -1  -3 -16  109.26    8.30
   1   3  16  114.58    7.74
   0   3  15    3.34    1.42
   0  -3 -15    1.45    1.89
   1  -3 -14   39.06    4.85
  -1   3  14   38.15    3.63
  -2   3  13    0.35    1.13
   2  -3 -13   -0.01    1.50
  -3   3  12   30.39    2.88
   3  -3 -12   33.93    4.22
   4  -3 -11   -0.54    1.36
  -4   3  11    1.34    0.70
   4  -3 -11   -0.81    1.27
  -5   3  10  468.04   19.67
   5  -3 -10  472.69   21.99
   6  -3  -9   -0.39    1.07
   6  -3  -9   -0.16    1.38
   7  -3  -8  502.69   22.86
   8  -3  -7   -0.87    1.58
   9  -3  -6   59.05    4.98
  10  -3  -5    1.04    1.60
  11  -3  -4    3.97    2.38
  12  -3  -3   10.64    2.63
  13  -3  -2  396.74   19.61
  14  -3  -1   -0.53    1.90
  15  -3   0   25.64    4.31
  16  -3   1    3.65    2.24
  17  -3   2   44.36    5.76
  18  -3   3   -0.97    1.88
  19  -3   4   30.26    5.39
  20  -3   5   -2.13    2.02
  21  -3   6  301.30   17.94
  22  -3   7    0.72    1.91
   6   3  22    2.60    2.34
  -6  -3 -22    4.45    2.39
   5   3  21    2.15    2.21
  -5  -3 -21    2.06    2.35
   4   3  20   30.11    5.02
  -4  -3 -20   39.37    5.94
   3   3  19    1.87    1.80
  -3  -3 -19   -1.73    1.78
   2   3  18    0.48    1.04
  -2  -3 -18    0.64    2.07
   1   3  17    0.09    1.38
  -1  -3 -17   -0.65    1.84
   0  -3 -16  482.76   24.37
   0   3  16  509.71   22.94
   1  -3 -15    0.73    1.98
  -1   3  15   -0.26    0.69
   2  -3 -14   13.09    3.37
  -2   3  14   18.73    2.73
  -3   3  13    1.81    1.11
   3  -3 -13    0.32    1.32
   4  -3 -12  226.69   12.51
   5  -3 -11   -0.24    1.55
   5  -3 -11    0.59    1.13
   6  -3 -10   49.60    4.52
   7  -3  -9   -0.31    1.61
   8  -3  -8   18.26    3.21
   9  -3  -7   -1.00    1.64
  10  -3  -6    0.51    1.57
  11  -3  -5   -2.18    1.71
  12  -3  -4   -1.66    1.39
  13  -3  -3   16.86    3.42
  14  -3  -2    7.90    2.91
  15  -3  -1    1.27    2.32
  16  -3   0  112.51    8.43
  17  -3   1   -2.09    1.72
  18  -3   2   15.25    3.89
  19  -3   3    2.68    2.63
  20  -3   4   16.42    4.25
  21  -3   5    6.66    3.16
  22  -3   6   31.80    5.79
   5   3  22   23.03    4.97
  -5  -3 -22   34.15    5.71
  -4  -3 -21    2.52    2.35
   4   3  21   -0.43    1.99
   3   3  20   24.85    4.62
  -3  -3 -20   37.22    5.59
   2   3  19   -0.09    1.15
  -2  -3 -19   -0.18    1.95
   1   3  18  132.48    9.10
  -1  -3 -18  136.87    9.86
   0  -3 -17    0.83    1.77
   0   3  17    2.26    1.54
  -1   3  16  132.79    8.14
   1  -3 -16  134.25    9.13
   2  -3 -15    0.29    1.63
   3  -3 -14  106.06    7.76
   4  -3 -13   -0.13    1.11
   5  -3 -12   15.76    3.07
   5  -3 -12   10.40    2.46
   6  -3 -11   -0.21    0.96
   6  -3 -11    0.69    1.64
   7  -3 -10   10.62    2.85
   7  -3 -10    7.92    2.04
   8  -3  -9   -0.24    1.69
   9  -3  -8  253.08   13.36
  10  -3  -7   -0.88    1.62
  11  -3  -6  289.25   14.97
  12  -3  -5    0.41    1.68
  13  -3  -4  509.72   24.21
  14  -3  -3    1.08    2.19
  15  -3  -2  198.22   12.06
  16  -3  -1    1.10    2.30
  17  -3   0    9.11    2.97
  18  -3   1   -3.04    1.82
  19  -3   2  306.70   17.64
  20  -3   3   -0.01    2.55
  21  -3   4  240.24   15.28
  22  -3   5    2.43    2.70
  -4  -3 -22  131.12   10.23
   4   3  22  123.86    9.70
  -3  -3 -21    1.17    2.10
   3   3  21   -0.84    1.33
  -2  -3 -20  180.78   12.12
  -1  -3 -19   -0.22    1.71
   0  -3 -18    5.66    2.87
   1  -3 -17   -0.61    1.57
   2  -3 -16   -0.70    1.70
   3  -3 -15    0.03    1.72
   4  -3 -14  878.19   39.19
   5  -3 -13   -1.38    1.39
   6  -3 -12   78.96    5.82
   7  -3 -11   -0.41    1.53
   7  -3 -11   -0.85    1.11
   8  -3 -10   -1.40    1.94
   8  -3 -10   -0.76    0.86
   9  -3  -9   -2.08    1.56
  10  -3  -8  403.90   19.59
  11  -3  -7   -0.08    1.81
  12  -3  -6  399.53   19.63
  13  -3  -5    7.02    2.52
  14  -3  -4  206.37   12.26
  15  -3  -3    1.22    2.41
  16  -3  -2   18.45    4.08
  17  -3  -1    2.68    2.15
  18  -3   0  238.84   14.42
  19  -3   1   -1.81    2.01
  20  -3   2  430.42   22.93
  21  -3   3    0.45    2.27
  22  -3   4   39.17    6.32
  -3  -3 -22  184.70   12.69
  -2  -3 -21   -0.04    1.87
  -1  -3 -20   59.37    6.90
   0  -3 -19    0.48    1.93
   1  -3 -18  183.63   11.94
   2  -3 -17    1.44    1.66
   3  -3 -16  185.71   11.63
   4  -3 -15   -2.05    1.24
   5  -3 -14  882.30   39.47
   6  -3 -13   -0.73    1.26
   8  -3 -11   -1.01    1.63
   8  -3 -11    0.55    1.32
   9  -3 -10  128.85    8.37
  10  -3  -9   -3.28    1.59
  11  -3  -8   41.32    4.49
  12  -3  -7   -2.24    1.62
  13  -3  -6  164.71   10.31
  14  -3  -5    3.15    2.42
  15  -3  -4  283.16   15.64
  16  -3  -3   -1.66    1.81
  17  -3  -2  158.43   10.76
  18  -3  -1   -0.38    2.37
  19  -3   0    1.15    2.50
  20  -3   1    0.76    2.44
  21  -3   2    2.57    3.07
  22  -3   3    1.96    2.53
  -3  -3 -23    1.46    1.99
  -2  -3 -22  168.81   11.92
  -1  -3 -21   -0.71    1.71
   0  -3 -20  233.48   14.50
   1  -3 -19    0.02    1.85
   2  -3 -18    7.08    2.96
   3  -3 -17    0.17    1.46
   4  -3 -16  192.53   11.89
   5  -3 -15    2.52    1.76
   6  -3 -14    1.20    1.69
   7  -3 -13    0.61    1.79
   7  -3 -13   -1.14    1.28
   8  -3 -12    9.64    2.67
   8  -3 -12   19.53    3.50
   9  -3 -11    1.65    2.04
   9  -3 -11   -1.21    1.03
  10  -3 -10    5.01    2.61
  11  -3  -9   -0.31    1.52
  12  -3  -8   10.11    3.05
  13  -3  -7    0.25    2.36
  14  -3  -6  150.83   10.11
  15  -3  -5    0.63    1.96
  16  -3  -4   32.06    5.00
  17  -3  -3    1.10    2.22
  18  -3  -2   83.04    7.83
  19  -3  -1    1.72    2.44
  20  -3   0   17.29    4.28
  21  -3   1   -0.06    2.74
  22  -3   2   29.99    5.71
  23  -3   3    1.90    2.32
  -2  -3 -23    3.56    2.24
  -1  -3 -22  110.42    9.24
   0  -3 -21    0.33    1.75
   1  -3 -20    0.50    2.19
   2  -3 -19   -0.64    1.71
   3  -3 -18   23.30    4.55
   4  -3 -17   -0.63    1.29
   5  -3 -16   17.84    3.82
   6  -3 -15   -0.09    1.40
   7  -3 -14  108.48    7.94
   8  -3 -13   -0.84    1.31
   8  -3 -13    0.12    1.50
   9  -3 -12   76.00    6.24
  10  -3 -11    0.51    2.06
  11  -3 -10    0.64    1.79
  12  -3  -9   -0.68    2.41
  13  -3  -8  348.97   18.20
  14  -3  -7   -2.38    2.32
  15  -3  -6   33.96    5.24
  16  -3  -5   -0.07    2.18
  17  -3  -4   25.67    4.75
  18  -3  -3    1.90    2.56
  19  -3  -2   45.93    6.41
  20  -3  -1   -0.38    2.17
  21  -3   0   -2.93    2.28
  22  -3   1    0.47    2.52
  23  -3   2   10.56    3.43
  -1  -3 -23    1.51    2.07
   0  -3 -22   33.13    5.68
   1  -3 -21   -0.23    1.95
   2  -3 -20    3.86    2.63
   3  -3 -19    2.43    2.21
   4  -3 -18  279.82   16.13
   5  -3 -17   -1.09    1.41
   6  -3 -16  139.30    9.67
   7  -3 -15   -0.10    1.50
   8  -3 -14   90.32    7.12
   9  -3 -13   -1.33    1.20
   9  -3 -13   -0.22    1.71
  10  -3 -12   13.85    3.22
  10  -3 -12   14.85    3.37
  11  -3 -11    0.10    1.85
  12  -3 -10  230.03   13.45
  13  -3  -9    1.14    2.59
  14  -3  -8  426.90   21.78
  15  -3  -7   -2.12    1.77
  16  -3  -6    2.32    2.57
  17  -3  -5    2.69    2.71
  18  -3  -4  183.26   12.36
  19  -3  -3    1.82    2.98
  20  -3  -2  286.59   17.14
  21  -3  -1    2.59    2.68
  22  -3   0  129.77   10.60
  23  -3   1   -3.23    1.50
   0  -3 -23    1.99    2.04
   1  -3 -22   78.60    7.69
   2  -3 -21   -1.18    1.52
   3  -3 -20   21.37    4.59
   4  -3 -19    2.06    2.12
   5  -3 -18    4.21    2.45
   6  -3 -17    0.03    1.69
   7  -3 -16  475.94   23.83
   8  -3 -15    0.60    1.48
   9  -3 -14   61.80    5.84
   9  -3 -14   62.05    5.71
  10  -3 -13    0.78    1.74
  10  -3 -13    0.93    1.56
  11  -3 -12  116.10    8.84
  11  -3 -12  151.93    9.14
  12  -3 -11   -0.27    2.53
  13  -3 -10  115.62    8.82
  14  -3  -9    2.09    2.54
  15  -3  -8  558.75   27.33
  16  -3  -7   -1.62    2.34
  17  -3  -6   36.60    5.66
  18  -3  -5   -2.49    2.33
  19  -3  -4  265.59   16.40
  20  -3  -3   -2.60    2.47
  21  -3  -2    4.07    3.19
  22  -3  -1    0.67    2.63
  23  -3   0   35.85    6.27
   1  -3 -23    0.06    1.66
   2  -3 -22   96.60    8.68
   3  -3 -21   -0.51    1.91
   4  -3 -20    1.29    2.04
   5  -3 -19   -0.80    1.60
   6  -3 -18  140.86   10.20
   7  -3 -17    0.26    1.96
   8  -3 -16  329.26   17.96
   9  -3 -15   -0.44    1.58
  10  -3 -14  153.59   10.26
  10  -3 -14  170.59   10.68
  11  -3 -13    1.42    2.35
  11  -3 -13    0.23    1.64
  12  -3 -12   34.59    5.20
  13  -3 -11   -0.48    2.40
  14  -3 -10  215.52   13.30
  15  -3  -9    0.09    2.22
  16  -3  -8  117.32    9.14
  17  -3  -7   -0.67    2.56
  18  -3  -6   31.91    5.66
  19  -3  -5   -2.81    2.47
  20  -3  -4   18.00    5.00
  21  -3  -3   -1.12    2.31
  22  -3  -2   70.00    8.32
  23  -3  -1    0.31    2.43
   2  -3 -23   -0.47    1.68
   3  -3 -22   47.25    6.67
   4  -3 -21    0.42    2.14
   5  -3 -20    5.23    2.48
   6  -3 -19   -0.11    1.92
   7  -3 -18   24.98    4.89
   8  -3 -17   -0.40    1.91
   9  -3 -16   24.76    4.55
  10  -3 -15    0.53    1.50
  11  -3 -14   61.00    6.18
  12  -3 -13    0.06    1.81
  12  -3 -13    0.55    2.20
  13  -3 -12   17.78    4.36
  14  -3 -11   -0.64    2.52
  15  -3 -10    5.63    3.25
  16  -3  -9   -0.28    2.45
  17  -3  -8  185.50   12.55
  18  -3  -7    0.73    2.95
  19  -3  -6  141.47   10.85
  20  -3  -5   -3.31    2.46
  21  -3  -4   47.72    7.03
  22  -3  -3    1.74    2.67
  23  -3  -2   -0.75    2.19
   3  -3 -23   -0.56    1.69
   4  -3 -22    5.49    2.70
   5  -3 -21   -1.13    1.76
   6  -3 -20   99.02    8.58
   7  -3 -19    0.16    2.20
   8  -3 -18   32.51    5.35
   9  -3 -17   -1.81    1.72
  10  -3 -16    4.97    2.39
  11  -3 -15   -1.90    1.45
  12  -3 -14   68.01    6.27
  12  -3 -14   53.40    6.42
  13  -3 -13   -0.55    1.38
  13  -3 -13   -1.10    1.96
  14  -3 -12  169.40   11.46
  15  -3 -11    0.01    2.22
  16  -3 -10   66.46    7.08
  17  -3  -9    0.79    2.87
  18  -3  -8   -0.76    2.88
  19  -3  -7   -0.12    2.21
  20  -3  -6    0.59    3.11
  21  -3  -5    2.82    2.94
  22  -3  -4  224.23   15.28
  23  -3  -3    4.95    2.82
   4  -3 -23    2.26    2.02
   5  -3 -22    2.01    2.46
   6  -3 -21    0.22    1.95
   7  -3 -20    5.27    3.18
   8  -3 -19    0.88    1.96
   9  -3 -18  411.73   22.06
  10  -3 -17    1.68    2.09
  11  -3 -16   47.03    6.03
  12  -3 -15   -0.03    1.94
  12  -3 -15   -1.55    2.30
  13  -3 -14   63.54    6.49
  14  -3 -13   -2.61    2.28
  15  -3 -12  185.08   12.42
  16  -3 -11   -2.87    2.55
  17  -3 -10  334.39   19.19
  18  -3  -9   -0.70    3.12
  19  -3  -8    1.19    2.72
  20  -3  -7    0.41    2.54
  21  -3  -6  270.08   17.08
  22  -3  -5   -1.50    2.80
  23  -3  -4  132.46   11.09
   6  -3 -22   43.77    6.32
   7  -3 -21    2.15    1.91
   8  -3 -20  201.44   13.45
   9  -3 -19    0.58    2.13
  10  -3 -18  353.23   19.60
  11  -3 -17   -0.15    1.88
  12  -3 -16   15.40    3.89
  13  -3 -15   -0.62    1.75
  13  -3 -15    2.22    2.60
  14  -3 -14  133.26    9.35
  14  -3 -14  116.15    9.36
  15  -3 -13   -1.39    2.26
  16  -3 -12  190.91   12.93
  17  -3 -11    0.33    2.57
  18  -3 -10   67.43    8.09
  19  -3  -9    1.55    3.05
  20  -3  -8   14.49    4.81
  21  -3  -7   -1.50    2.97
  22  -3  -6   29.30    5.86
  23  -3  -5    2.15    3.10
   7  -3 -22   10.64    3.40
   8  -3 -21    3.97    2.15
   9  -3 -20   14.21    4.17
  10  -3 -19    2.58    2.42
  11  -3 -18  189.62   12.69
  12  -3 -17    0.38    1.90
  13  -3 -16   52.58    5.74
  14  -3 -15   -3.25    1.61
  14  -3 -15   -0.42    2.00
  15  -3 -14   30.81    5.42
  16  -3 -13   -0.72    2.71
  17  -3 -12    1.25    3.28
  18  -3 -11   -0.15    2.12
  19  -3 -10  109.60    9.66
  20  -3  -9   -1.80    2.59
  21  -3  -8  107.12    9.82
  22  -3  -7    5.90    3.21
   8  -3 -22   13.53    3.71
   9  -3 -21    0.67    2.02
  10  -3 -20   14.54    4.02
  11  -3 -19    3.26    2.28
  12  -3 -18    5.16    2.84
  13  -3 -17   -0.40    1.95
  14  -3 -16  156.80   11.46
  14  -3 -16  155.14   10.89
  15  -3 -15   -1.52    2.47
  15  -3 -15    0.66    1.84
  16  -3 -14   19.00    4.85
  16  -3 -14   16.45    3.66
  17  -3 -13    2.42    2.53
  18  -3 -12    5.28    3.31
  19  -3 -11    0.84    2.89
  20  -3 -10   -0.48    2.73
  21  -3  -9   -0.41    2.52
  22  -3  -8   98.47    9.49
  10  -3 -21    2.36    2.19
  11  -3 -20  202.58   13.60
  12  -3 -19    1.48    1.97
  13  -3 -18    4.20    2.66
  14  -3 -17   -1.04    1.90
  15  -3 -16   83.47    7.51
  15  -3 -16   79.85    8.20
  16  -3 -15    3.65    2.84
  16  -3 -15    1.95    2.13
  17  -3 -14    3.09    2.84
  18  -3 -13   -0.10    2.93
  19  -3 -12   96.31    8.96
  20  -3 -11   -0.09    2.77
  21  -3 -10    1.61    2.77
  11  -3 -21   -2.72    1.75
  12  -3 -20   67.21    7.16
  13  -3 -19   -0.49    1.89
  14  -3 -18    2.36    2.18
  15  -3 -17   -0.15    1.69
  16  -3 -16    7.41    3.17
  16  -3 -16    0.01    2.08
  17  -3 -15    1.87    2.59
  17  -3 -15   -0.74    1.67
  18  -3 -14  292.75   17.90
  19  -3 -13   -0.98    2.18
  20  -3 -12   92.34    8.88
  21  -3 -11    1.99    2.71
  14  -3 -19   -2.61    1.87
  15  -3 -18   -4.36    1.45
  16  -3 -17   -2.93    1.42
  17  -3 -16   84.44    8.48
  17  -3 -16   80.24    7.50
  18  -3 -15    3.21    3.33
  18  -3 -15    0.88    1.84
  19  -3 -14    8.21    4.10
  20  -3 -13    5.66    3.07
  17   4 -15   -1.51    2.19
  16   4 -16   53.49    7.47
  15   4 -17   -0.18    2.12
  19   4 -12   51.71    7.22
  18   4 -13    2.88    2.04
  17   4 -14   12.78    3.96
  16   4 -15    1.17    2.31
  15   4 -16    1.84    2.14
  14   4 -17    1.74    2.02
  13   4 -18  103.25    9.27
  12   4 -19    0.86    2.75
  20   4 -10    2.59    2.13
  19   4 -11    0.40    2.38
  18   4 -12   19.83    4.72
  17   4 -13    0.12    1.99
  16   4 -14   97.80    9.18
  15   4 -15    0.01    2.08
  14   4 -16    8.28    3.43
  13   4 -17    0.25    1.98
  12   4 -18   16.05    4.22
  11   4 -19   -2.01    1.68
  10   4 -20    2.79    2.55
  21   4  -8    9.96    3.26
  20   4  -9   -2.41    2.21
  19   4 -10    2.17    2.23
  18   4 -11    0.39    2.21
  17   4 -12   93.02    8.61
  16   4 -13    1.21    2.14
  15   4 -14  142.79   11.11
  14   4 -15    0.61    2.04
  13   4 -16    2.19    2.47
  12   4 -17    0.14    2.22
  11   4 -18   38.88    6.17
  10   4 -19    2.10    2.66
   9   4 -20  295.53   18.11
   8   4 -21    3.25    2.52
  21   4  -7   -2.87    2.14
  20   4  -8   45.82    7.01
  19   4  -9    1.48    2.41
  18   4 -10   59.36    7.62
  17   4 -11   -0.90    1.86
  16   4 -12    0.82    2.32
  15   4 -13    3.23    2.76
  14   4 -14  401.55   22.28
  13   4 -15   -0.93    2.37
  12   4 -16   36.84    6.29
  11   4 -17   -0.85    2.06
  10   4 -18    0.76    1.99
   9   4 -19    0.43    2.29
   8   4 -20    6.24    3.09
   7   4 -21    1.13    2.47
  21   4  -6   61.52    7.86
  20   4  -7   -1.35    2.46
  19   4  -8   31.61    5.98
  18   4  -9    3.01    2.64
  17   4 -10   15.43    4.33
  16   4 -11   -1.18    1.63
  15   4 -12    7.94    3.36
  14   4 -13    3.43    2.39
  13   4 -14    3.67    2.61
  12   4 -15   -1.85    1.86
  11   4 -16   16.35    4.56
  10   4 -17   -0.20    2.26
   9   4 -18   22.46    5.12
   8   4 -19    4.29    2.70
   7   4 -20   34.30    5.97
   6   4 -21   -0.81    2.03
  21   4  -5    1.47    2.84
  20   4  -6   16.13    4.54
  19   4  -7   -1.38    1.76
  18   4  -8    4.30    2.69
  17   4  -9   -1.01    2.08
  16   4 -10  331.16   19.09
  15   4 -11    4.17    3.21
  14   4 -12   28.09    5.53
  13   4 -13   -0.70    2.30
  12   4 -14  128.64   10.09
  11   4 -15   -3.33    1.83
  10   4 -16   33.86    5.72
   9   4 -17    1.11    2.23
   8   4 -18   38.93    6.17
   7   4 -19   -3.41    2.18
   6   4 -20    5.37    3.05
   5   4 -21    0.01    2.23
   4   4 -22  146.53   11.27
  21   4  -4  111.30    9.61
  20   4  -5    2.44    2.56
  19   4  -6   23.08    5.17
  18   4  -7    1.89    2.55
  17   4  -8  119.96    9.80
  16   4  -9    3.99    2.65
  15   4 -10  831.59   39.14
  14   4 -11    1.61    2.70
  13   4 -12  262.85   15.96
  12   4 -13    0.23    2.19
  11   4 -14    3.84    2.73
  10   4 -15    0.34    2.29
  -9  -4  16  142.47    9.18
   9   4 -16  133.11   10.31
  -8  -4  17    0.60    0.98
   8   4 -17    0.26    2.13
  -6  -4  19   -1.62    1.66
   6   4 -19   -1.54    2.38
  -5  -4  20   53.04    6.58
   5   4 -20   68.05    7.82
  -4  -4  21    2.81    2.14
   4   4 -21    1.96    2.40
  -3  -4  22   23.23    4.68
   3   4 -22   18.79    4.78
  20   4  -4   60.93    7.45
  19   4  -5    1.75    2.34
  18   4  -6   10.48    3.63
  17   4  -7   -1.23    1.83
  16   4  -8  226.46   14.35
  15   4  -9    1.85    2.54
  14   4 -10  468.86   24.39
  13   4 -11    1.65    2.48
 -12  -4  12  365.34   16.81
  12   4 -12  392.50   20.24
 -12  -4  12  336.44   17.48
 -11  -4  13    1.55    1.37
 -11  -4  13    0.16    1.64
  11   4 -13   -0.77    1.98
  10   4 -14   18.95    4.63
 -10  -4  14   18.82    3.45
 -10  -4  14   16.82    3.45
   9   4 -15   -2.30    1.96
  -9  -4  15   -0.23    0.96
   8   4 -16   52.14    6.78
   7   4 -17   -1.94    2.13
  -7  -4  17   -1.66    0.85
  -6  -4  18   63.02    6.09
   6   4 -18   71.74    7.00
   5   4 -19    2.04    2.75
  -5  -4  19   -0.17    1.80
  -4  -4  20  320.52   18.08
   4   4 -20  326.68   18.87
   3   4 -21   -1.16    2.27
  -3  -4  21   -0.69    1.94
  -2  -4  22   10.96    3.81
  19   4  -4   33.24    5.71
  18   4  -5   -0.54    2.15
  17   4  -6   11.01    3.99
  16   4  -7    2.34    2.27
  15   4  -8   70.37    6.96
  14   4  -9   -1.23    1.59
  14   4  -9    1.84    1.92
  13   4 -10    2.45    2.06
  13   4 -10    7.28    3.17
  12   4 -11   -2.51    1.52
  12   4 -11    1.41    2.05
 -11  -4  12  276.64   13.51
 -11  -4  12  265.89   14.11
  11   4 -12  276.84   16.01
 -10  -4  13    0.20    1.09
  10   4 -13    0.33    1.99
 -10  -4  13   -1.51    1.57
  -9  -4  14   14.15    2.85
  -9  -4  14   17.14    3.04
   8   4 -15   -0.08    2.05
  -8  -4  15   -1.43    0.56
   7   4 -16   75.04    7.24
  -7  -4  16   68.90    6.03
  -6  -4  17   -1.12    1.14
   6   4 -17   -0.60    2.33
   5   4 -18    3.60    2.76
  -5  -4  18    1.56    1.87
  -4  -4  19    0.43    1.92
   4   4 -19    2.00    2.08
   3   4 -20    6.13    3.75
  -3  -4  20   10.60    3.25
  -2  -4  21    1.41    1.92
   2   4 -21   -0.87    2.24
  -1  -4  22   18.87    4.55
  19   4  -3    0.49    2.00
  18   4  -4   88.16    7.88
  17   4  -5    1.70    2.03
  16   4  -6   40.55    5.77
  16   4  -6   38.19    4.72
  15   4  -7   -0.19    1.52
  15   4  -7   -1.07    1.83
  14   4  -8   96.52    8.21
  14   4  -8  104.71    7.38
  13   4  -9    0.07    1.87
  13   4  -9   -0.48    1.16
  12   4 -10   78.54    7.19
  12   4 -10   72.87    6.07
  11   4 -11    0.36    1.92
 -10  -4  12  492.86   22.17
 -10  -4  12  452.35   20.77
   9   4 -13    0.41    1.68
  -9  -4  13   -0.36    0.66
  -9  -4  13   -0.83    0.79
  -8  -4  14   16.86    3.39
   8   4 -14   20.40    4.43
  -8  -4  14   19.95    3.50
   7   4 -15   -1.58    2.14
  -7  -4  15   -0.09    1.21
  -6  -4  16   67.55    5.97
   6   4 -16   62.87    6.71
  -5  -4  17    0.73    1.49
   5   4 -17   -1.62    1.96
  -4  -4  18    2.99    2.47
   4   4 -18   -0.77    2.65
   3   4 -19    0.86    2.23
  -3  -4  19   -1.21    1.33
  -2  -4  20   95.45    8.39
   2   4 -20  104.82    9.02
  -1  -4  21    0.84    2.16
   0  -4  22   12.59    3.81
  18   4  -3    2.39    2.12
  18   4  -3    2.59    1.64
  17   4  -4   16.19    3.91
  17   4  -4   15.21    3.40
  16   4  -5    1.37    1.81
  16   4  -5    2.17    2.25
  15   4  -6   60.97    6.13
  15   4  -6   69.08    5.83
  14   4  -7   -0.18    1.83
  14   4  -7    3.65    1.88
  13   4  -8  354.58   17.79
  13   4  -8  379.89   19.68
  12   4  -9    0.26    1.70
  12   4  -9   -1.28    1.37
  11   4 -10  351.12   17.35
  11   4 -10  349.81   18.83
  10   4 -11    0.65    1.69
 -10  -4  11    0.48    0.64
 -10  -4  11    0.49    0.64
  -9  -4  12   27.04    3.52
  -9  -4  12   20.22    3.17
   8   4 -13   -1.15    1.46
  -8  -4  13    0.29    1.12
  -8  -4  13    1.62    1.76
   7   4 -14  248.89   14.86
  -7  -4  14  245.81   13.54
   6   4 -15    0.21    2.13
  -6  -4  15    1.77    1.41
  -5  -4  16  399.29   19.61
   5   4 -16  372.04   20.69
   4   4 -17    0.80    2.48
  -4  -4  17    1.13    1.27
  -3  -4  18  140.19   10.09
   3   4 -18  140.17   10.53
  -2  -4  19    1.09    1.95
   2   4 -19    0.66    2.27
  -1  -4  20   69.63    7.02
   0  -4  21    1.71    2.14
   1  -4  22   87.02    8.26
  20   4   0   32.27    5.44
  19   4  -1   -1.38    1.86
  18   4  -2   35.66    5.08
  18   4  -2   31.92    5.14
  17   4  -3    1.26    1.83
  17   4  -3   -0.37    1.24
  16   4  -4   12.03    3.13
  16   4  -4    3.95    2.30
  15   4  -5    0.99    1.55
  15   4  -5    0.00    1.47
  14   4  -6    5.72    2.68
  14   4  -6    7.48    2.47
  13   4  -7   -0.02    1.46
  13   4  -7    0.46    1.36
  12   4  -8  171.23    9.92
  12   4  -8  161.63   10.98
  11   4  -9   -1.84    1.46
  11   4  -9    0.47    1.29
  10   4 -10   15.38    3.71
  10   4 -10   23.02    3.73
  -9  -4  11   -0.15    1.15
   9   4 -11   -1.89    1.21
  -9  -4  11    0.96    1.09
  -8  -4  12    6.72    2.36
  -8  -4  12   11.29    2.68
   8   4 -12    9.39    3.18
   7   4 -13    2.22    1.98
  -7  -4  13    1.27    1.37
  -7  -4  13   -0.92    1.48
   6   4 -14   47.65    6.17
  -5  -4  15    0.31    1.29
   5   4 -15   -1.01    1.74
   4   4 -16  102.25    8.51
  -4  -4  16   91.71    7.29
   3   4 -17    2.40    2.45
  -3  -4  17   -1.57    1.17
   2   4 -18  301.18   17.99
  -2  -4  18  333.96   17.78
  -1  -4  19   -0.05    1.99
   0  -4  20    1.40    2.03
   1  -4  21   -2.06    1.69
  21   4   2    2.71    2.78
  20   4   1    0.69    2.05
  19   4   0   24.14    4.78
  18   4  -1   -0.56    1.77
  17   4  -2   19.48    4.00
  17   4  -2   16.54    3.91
  16   4  -3    0.23    1.37
  16   4  -3   -0.17    1.74
  15   4  -4   32.98    5.07
  15   4  -4   30.65    4.51
  14   4  -5   -0.97    1.64
  14   4  -5   -0.95    1.41
  13   4  -6   82.72    7.06
  13   4  -6   80.05    6.31
  12   4  -7    0.08    1.14
  12   4  -7    2.38    2.20
  11   4  -8  201.05   11.43
  11   4  -8  214.60   12.71
  10   4  -9   -0.90    1.08
  10   4  -9    1.43    2.15
   9   4 -10   26.07    4.50
   9   4 -10   29.21    4.01
  -8  -4  11   -0.23    1.19
   8   4 -11   -2.60    1.41
  -8  -4  11    1.58    1.11
  -7  -4  12   28.14    3.88
   7   4 -12   23.78    4.27
  -7  -4  12   21.29    3.53
  -6  -4  13   -1.18    0.79
   6   4 -13    0.56    1.81
  -6  -4  13    2.15    1.63
   5   4 -14   86.87    7.48
  -5  -4  14   79.51    6.49
   4   4 -15    1.02    2.29
  -4  -4  15   -1.94    1.11
  -3  -4  16    2.09    1.75
   3   4 -16    5.18    2.84
  -2  -4  17    0.76    1.80
   2   4 -17    0.79    2.48
  -1  -4  18    3.79    2.55
   1   4 -18   -3.41    1.97
   0  -4  19    0.11    1.92
   1  -4  20   10.41    3.63
   2  -4  21    2.64    2.28
  21   4   3   -1.60    1.90
  20   4   2    0.81    1.96
  19   4   1   -0.12    2.21
  18   4   0  206.30   12.61
  17   4  -1    1.29    1.90
  16   4  -2  172.30   11.27
  16   4  -2  182.60   11.03
  15   4  -3    0.30    1.29
  15   4  -3   -1.08    1.59
  14   4  -4   -0.01    1.77
  14   4  -4   -0.39    1.52
  13   4  -5    0.05    1.63
  13   4  -5    1.98    1.77
  12   4  -6   35.68    4.44
  12   4  -6   31.68    4.67
  11   4  -7    1.58    1.78
  11   4  -7    0.50    1.07
  10   4  -8  328.14   17.46
  10   4  -8  334.96   16.50
   9   4  -9   -0.37    1.05
   9   4  -9    3.23    2.14
   8   4 -10   12.18    3.58
  -7  -4  11    2.03    1.53
   7   4 -11   -0.23    1.41
  -7  -4  11    0.24    1.01
   6   4 -12   12.34    3.39
  -6  -4  12   13.89    2.97
  -6  -4  12    9.04    2.54
   5   4 -13    2.76    2.17
  -5  -4  13    0.38    1.28
  -4  -4  14  389.73   18.75
   4   4 -14  351.36   19.53
   3   4 -15    3.78    2.30
  -3  -4  15   -0.91    0.99
  -2  -4  16   45.68    5.63
   2   4 -16   47.81    6.14
   1   4 -17   -0.15    2.57
  -1  -4  17   -1.05    1.33
   0  -4  18  218.71   13.63
   1  -4  19    4.68    2.49
   2  -4  20    7.32    3.06
   3  -4  21    1.08    2.01
  21   4   4   22.59    4.74
  20   4   3   -1.05    1.57
  19   4   2    0.95    2.31
  18   4   1    6.75    2.65
  17   4   0   64.49    6.19
  16   4  -1    3.37    2.26
  16   4  -1    5.33    2.36
  15   4  -2   77.86    6.64
  15   4  -2   82.97    6.75
  14   4  -3    0.92    1.16
  14   4  -3    1.68    1.90
  13   4  -4    8.07    2.70
  13   4  -4    1.82    1.84
  12   4  -5    0.42    1.25
  12   4  -5   -0.86    1.16
  11   4  -6   60.37    5.03
  11   4  -6   51.27    5.29
  10   4  -7    0.79    1.71
  10   4  -7   -0.41    0.81
   9   4  -8    5.68    2.38
   9   4  -8    1.40    1.29
   8   4  -9   -1.34    1.61
   8   4  -9    1.81    1.13
   7   4 -10  431.18   21.66
  -7  -4  10  421.02   20.31
  -7  -4  10  448.85   19.36
  -6  -4  11    0.61    1.42
   6   4 -11   -0.01    1.72
  -6  -4  11   -0.38    1.35
  -5  -4  12   89.70    6.78
   5   4 -12   97.73    7.72
  -5  -4  12   99.13    6.75
  -4  -4  13    1.41    1.67
   4   4 -13   -0.83    1.71
  -3  -4  14  187.43   11.44
   3   4 -14  208.24   12.70
   2   4 -15   -3.25    1.57
  -2  -4  15   -1.96    0.97
  -1  -4  16   72.98    6.71
   1   4 -16   81.37    7.18
   0  -4  17    1.51    1.88
   1  -4  18  162.12   11.28
   2  -4  19    0.83    1.77
   3  -4  20  110.90    9.35
   4  -4  21   -0.16    2.06
  21   4   5   -0.97    1.79
  20   4   4   19.02    4.35
  19   4   3    0.44    1.99
  18   4   2  423.79   21.73
  17   4   1   15.19    3.54
  16   4   0  146.51    9.83
  15   4  -1    0.50    1.93
  15   4  -1    0.25    1.38
  14   4  -2   52.96    5.25
  14   4  -2   55.47    5.28
  13   4  -3   -0.27    0.73
  13   4  -3   -1.71    1.16
  12   4  -4   12.57    2.95
  12   4  -4   11.77    2.87
  11   4  -5    1.22    1.34
  11   4  -5   -0.02    1.05
  10   4  -6   42.09    4.11
  10   4  -6   40.49    4.37
   9   4  -7   -0.07    1.17
   9   4  -7   -0.87    1.14
   8   4  -8    1.26    1.56
   8   4  -8    0.93    1.17
   7   4  -9   -0.96    1.03
   7   4  -9    0.94    1.68
  -6  -4  10  153.69    9.21
   6   4 -10  148.32    9.96
  -6  -4  10  165.73    8.95
  -5  -4  11   -0.55    1.30
   5   4 -11   -1.20    1.36
  -5  -4  11   -0.70    1.03
  -4  -4  12  390.28   17.79
   4   4 -12  380.17   19.81
  -4  -4  12  378.12   18.72
  -3  -4  13    0.26    1.37
   3   4 -13   -2.16    2.02
   2   4 -14  239.82   14.10
  -2  -4  14  235.15   13.34
  -1  -4  15    0.26    1.49
   1   4 -15   -1.35    1.73
   0  -4  16   40.67    5.44
   1  -4  17   -1.38    1.49
   2  -4  18   -1.43    1.57
   3  -4  19    2.33    2.26
   4  -4  20    8.24    3.28
   5  -4  21   -2.70    1.52
  21   4   6   -0.21    1.99
  20   4   5   -0.70    1.97
  19   4   4  308.80   17.28
  18   4   3   -1.95    1.91
  17   4   2  643.00   30.09
  16   4   1   11.16    3.09
  15   4   0    3.90    2.18
  14   4  -1    5.63    2.47
  14   4  -1    7.10    2.07
  13   4  -2  124.83    8.34
  13   4  -2  126.20    8.45
  12   4  -3   -0.24    0.78
  12   4  -3    0.47    1.35
  11   4  -4  367.87   17.63
  11   4  -4  348.64   17.98
  10   4  -5   -0.63    1.23
  10   4  -5   -0.67    1.04
   9   4  -6  283.74   15.43
   9   4  -6  311.85   15.17
   8   4  -7   -1.16    1.17
   8   4  -7    2.15    1.37
   7   4  -8    1.10    1.21
   7   4  -8   -1.89    1.10
   6   4  -9    0.49    1.42
  -5  -4  10  523.57   24.17
  -5  -4  10  533.21   22.98
   5   4 -10  542.15   25.59
  -4  -4  11    5.50    1.89
   4   4 -11    1.10    1.78
  -4  -4  11    1.50    1.17
   3   4 -12 1352.57   59.57
  -3  -4  12 1404.53   57.31
   2   4 -13   -1.10    2.15
  -2  -4  13   -0.65    1.33
  -1  -4  14  136.62    9.22
   1   4 -14  142.33    9.92
   0  -4  15    0.37    1.39
   1  -4  16    4.99    2.38
   2  -4  17    1.54    1.91
   3  -4  18   20.51    4.66
   4  -4  19   -0.02    2.12
   5  -4  20   46.17    6.80
   6  -4  21   -1.49    1.40
  20   4   6   27.88    5.12
  19   4   5   -0.25    1.66
  18   4   4  148.61   10.48
  17   4   3    0.33    1.80
  16   4   2  422.48   21.26
  15   4   1    1.72    1.82
  14   4   0  471.89   22.74
  14   4   0  476.65   22.69
  13   4  -1    1.32    1.83
  13   4  -1    3.58    1.81
  12   4  -2   12.72    2.79
  12   4  -2    6.12    2.24
  11   4  -3    1.21    0.79
  11   4  -3   -0.70    0.91
  10   4  -4  136.17    8.52
  10   4  -4  138.00    8.73
   9   4  -5   -0.07    1.33
   9   4  -5   -1.09    1.09
   8   4  -6  545.67   25.70
   8   4  -6  559.63   24.95
   7   4  -7    0.59    1.51
   7   4  -7   -1.19    1.12
   6   4  -8  458.57   22.25
   6   4  -8  470.48   21.63
  -5  -4   9    0.84    1.02
   5   4  -9    1.75    1.28
  -5  -4   9    2.06    1.21
  -4  -4  10   25.36    3.72
   4   4 -10   30.37    4.40
  -4  -4  10   26.63    3.68
  -3  -4  11    1.48    1.51
   3   4 -11    0.87    1.68
  -3  -4  11    0.31    1.14
   2   4 -12  141.85    9.61
  -2  -4  12  130.05    8.72
   1   4 -13   -0.57    2.20
  -1  -4  13    0.80    1.57
   0  -4  14  167.77   10.57
   1  -4  15   -2.98    0.82
   2  -4  16  303.66   16.83
   3  -4  17   -0.03    1.98
   4  -4  18  117.69    9.54
   5  -4  19    1.34    2.62
   6  -4  20    1.08    2.57
  20   4   7    2.85    2.48
  19   4   6    7.76    2.96
  18   4   5    1.56    2.25
  17   4   4   47.81    6.17
  16   4   3    2.84    2.09
  15   4   2  130.62    9.08
  14   4   1    0.03    1.61
  13   4   0  427.77   20.42
  13   4   0  405.40   19.92
  12   4  -1    0.12    1.47
  12   4  -1    2.70    1.28
  11   4  -2   70.68    5.56
  11   4  -2   84.03    6.11
  10   4  -3   -0.02    0.67
  10   4  -3    2.22    1.54
   9   4  -4   87.19    6.33
   9   4  -4   88.13    6.27
   8   4  -5   -0.43    1.15
   8   4  -5   -0.55    1.04
   7   4  -6   14.19    2.90
   7   4  -6   17.82    3.31
   6   4  -7    0.34    1.23
   6   4  -7   -1.79    1.13
   5   4  -8  136.53    8.40
   5   4  -8  123.10    8.37
   4   4  -9    1.09    1.47
  -4  -4   9   -0.63    0.82
  -4  -4   9    0.57    1.25
  -3  -4  10  261.71   12.93
   3   4 -10  264.81   14.49
  -3  -4  10  262.67   13.69
   2   4 -11   -0.66    1.61
  -2  -4  11    0.44    1.09
  -1  -4  12  163.43   10.16
   1   4 -12  175.61   11.01
   0  -4  13   -0.48    1.51
   1  -4  14  213.71   12.59
   2  -4  15   -0.04    1.47
   3  -4  16  190.75   12.27
   4  -4  17    3.39    2.37
   5  -4  18  176.36   12.25
   6  -4  19   -2.02    1.65
   7  -4  20  137.09   10.92
  20   4   8   10.79    3.63
  19   4   7    0.84    1.57
  18   4   6   26.18    4.87
  17   4   5    1.48    2.37
  16   4   4   90.51    7.51
  15   4   3   -0.68    1.77
  14   4   2   22.40    4.17
  13   4   1   -0.15    1.87
  12   4   0  174.94   10.01
  12   4   0  178.61   10.64
  11   4  -1   -0.61    1.16
  11   4  -1    1.62    1.38
  10   4  -2    8.64    2.39
  10   4  -2    9.16    2.44
   9   4  -3    0.88    1.58
   9   4  -3    0.63    0.71
   8   4  -4  240.33   12.18
   8   4  -4  209.47   11.86
   7   4  -5   -1.13    0.81
   7   4  -5    0.61    1.08
   6   4  -6  149.52    9.39
   6   4  -6  181.66    9.80
   5   4  -7    0.52    1.48
   5   4  -7   -0.77    1.08
   4   4  -8  407.22   20.00
   3   4  -9   -0.63    1.14
  -3  -4   9    0.48    0.96
  -3  -4   9    1.58    1.32
  -2  -4  10    7.00    2.10
   2   4 -10   13.15    3.15
  -2  -4  10   13.63    2.75
  -1  -4  11   -0.53    0.93
   1   4 -11   -1.35    1.50
   0   4 -12   75.93    6.59
   0  -4  12   72.21    6.07
   1  -4  13   -0.84    1.31
   2  -4  14  198.74   12.16
   3  -4  15    0.05    1.88
   4  -4  16  309.57   17.37
   5  -4  17   -0.85    1.65
   6  -4  18   -0.28    2.04
   7  -4  19    0.51    1.88
   8  -4  20    3.32    2.70
  19   4   8    0.60    1.65
  18   4   7    1.13    1.87
  17   4   6  233.71   14.08
  16   4   5   -0.17    1.97
  15   4   4  651.59   30.19
  14   4   3    0.12    1.86
  13   4   2  431.84   21.11
  12   4   1    0.88    1.22
  12   4   1    0.93    1.69
  11   4   0  104.53    6.93
  11   4   0  117.62    7.78
  10   4  -1    0.87    1.37
  10   4  -1    0.70    1.30
   9   4  -2 1708.46   72.42
   9   4  -2 1790.39   70.92
   8   4  -3   -0.53    0.93
   8   4  -3   -0.32    0.97
   7   4  -4 1557.58   62.59
   7   4  -4 1508.73   64.15
   6   4  -5   -1.57    0.96
   6   4  -5    0.91    1.07
   5   4  -6    6.30    1.99
   5   4  -6    7.66    2.16
   4   4  -7    1.10    1.14
   4   4  -7    0.79    1.07
   3   4  -8  734.47   32.83
  -3  -4   8  715.78   29.73
  -3  -4   8  729.94   31.53
  -2  -4   9   -1.48    0.83
   2   4  -9    0.97    1.20
  -2  -4   9    0.69    1.24
   1   4 -10  339.44   17.16
  -1  -4  10  332.76   15.47
  -1  -4  10  317.55   16.26
   0  -4  11   -0.96    0.90
   0   4 -11   -0.26    1.46
   1  -4  12  274.52   14.63
   2  -4  13   -0.80    1.56
   3  -4  14    1.00    1.59
   4  -4  15    0.64    1.78
   5  -4  16  550.42   27.04
   6  -4  17   -0.03    1.75
   7  -4  18   38.01    6.26
   8  -4  19    0.29    1.91
  19   4   9   -1.00    1.65
  18   4   8   88.49    7.83
  17   4   7    5.44    2.59
  16   4   6    5.60    2.88
  15   4   5    0.43    1.57
  14   4   4  847.40   37.55
  13   4   3   -1.91    1.67
  12   4   2    3.17    2.17
  11   4   1   -0.35    1.38
  11   4   1    0.69    1.24
  10   4   0  118.13    7.29
  10   4   0  117.11    7.93
   9   4  -1   -0.22    1.40
   9   4  -1    1.89    1.36
   8   4  -2    1.24    1.19
   8   4  -2   -0.29    1.21
   7   4  -3   -0.49    1.18
   7   4  -3    1.34    1.19
   6   4  -4 1149.07   45.99
   6   4  -4  999.40   44.59
   5   4  -5    0.53    1.02
   5   4  -5    0.27    1.14
   4   4  -6  286.78   14.78
   4   4  -6  292.56   14.49
   3   4  -7    2.74    1.47
   3   4  -7    0.28    1.10
   2   4  -8  192.28   10.88
  -2  -4   8  177.23   10.24
  -2  -4   8  193.06    9.96
   1   4  -9   -0.86    1.05
  -1  -4   9    0.95    1.37
  -1  -4   9    1.41    1.19
   0  -4  10   27.49    3.82
   1  -4  11    0.17    1.26
   2  -4  12 1438.13   59.73
   3  -4  13    0.91    1.77
   4  -4  14  349.71   18.35
   5  -4  15    0.90    1.95
   6  -4  16   23.41    4.78
   7  -4  17   -1.08    1.36
   8  -4  18   87.74    8.35
   9  -4  19   -3.54    1.77
  19   4  10    6.49    2.66
  18   4   9    1.23    1.97
  17   4   8   -1.78    1.33
  16   4   7   -3.07    1.50
  15   4   6   11.91    3.47
  14   4   5    0.88    1.89
  13   4   4  122.58    8.66
  12   4   3    5.29    2.43
  11   4   2   -0.04    1.59
  10   4   1   -0.01    1.03
  10   4   1    0.93    1.12
   9   4   0  201.54   10.61
   9   4   0  207.37   11.48
   8   4  -1    1.37    1.30
   8   4  -1    0.22    1.12
   7   4  -2  251.46   12.82
   7   4  -2  256.87   13.08
   6   4  -3   -0.25    0.95
   6   4  -3    1.41    1.27
   5   4  -4  104.64    7.05
   5   4  -4  124.37    7.50
   4   4  -5    1.24    1.36
   4   4  -5    0.95    1.10
   3   4  -6   86.43    6.26
   3   4  -6   87.70    6.20
  -2  -4   7   -0.03    0.79
  -2  -4   7    0.33    0.95
   2   4  -7    0.48    1.08
  -1  -4   8    1.66    1.49
   1   4  -8    1.97    1.62
  -1  -4   8    1.72    1.39
   0  -4   9    0.17    1.12
   0  -4   9    0.22    0.79
   1  -4  10   47.31    4.52
   2  -4  11    2.10    1.72
   3  -4  12    0.58    1.69
   4  -4  13    2.39    1.85
   5  -4  14  179.76   11.52
   6  -4  15    0.43    1.96
   7  -4  16   61.60    7.20
   8  -4  17    2.66    2.50
   9  -4  18   13.00    4.24
  10  -4  19    2.54    2.71
  18   4  10    1.09    1.91
  17   4   9   -0.23    1.86
  16   4   8   59.09    6.84
  15   4   7   -1.05    1.69
  14   4   6   69.68    6.48
  13   4   5   -0.54    1.76
  12   4   4 1000.63   43.04
  11   4   3    2.22    1.59
  10   4   2  111.32    7.62
  10   4   2  115.02    6.69
   9   4   1    0.59    0.84
   9   4   1    1.07    1.36
   8   4   0    4.06    1.37
   8   4   0    0.14    1.32
   7   4  -1    7.63    1.79
   7   4  -1   -0.25    0.84
   6   4  -2  788.10   37.27
   6   4  -2  974.59   37.42
   5   4  -3   -1.23    0.95
   5   4  -3    1.30    1.57
   4   4  -4 1399.42   57.31
   4   4  -4 1410.25   58.79
   3   4  -5    0.72    1.43
   3   4  -5   -0.41    0.90
   2   4  -6  210.86   11.48
   2   4  -6  223.09   11.76
  -1  -4   7    1.60    1.01
  -1  -4   7   -0.47    0.73
   1   4  -7   -0.42    0.86
   0  -4   8    1.15    1.19
   0  -4   8    0.78    1.15
   1  -4   9   -0.49    0.86
   2  -4  10  114.42    7.63
   3  -4  11   -1.23    1.20
   4  -4  12  109.08    8.11
   5  -4  13    0.93    1.72
   6  -4  14  468.22   23.41
   7  -4  15    1.63    2.38
   8  -4  16   14.81    4.20
   9  -4  17    1.55    2.49
  10  -4  18  132.81   10.76
  18   4  11    1.06    1.72
  17   4  10   -1.02    1.59
  16   4   9    5.69    2.38
  15   4   8  280.98   15.94
  14   4   7   -2.77    1.42
  13   4   6  321.56   16.98
  12   4   5    2.12    2.06
  11   4   4    3.77    2.04
  10   4   3    1.12    1.51
   9   4   2  348.78   16.87
   9   4   2  333.97   15.68
   8   4   1    0.59    1.18
   8   4   1    0.58    1.01
   7   4   0  631.21   27.43
   7   4   0  628.79   27.69
   6   4  -1    2.22    1.19
   6   4  -1    3.38    1.34
   3   4  -4   27.34    3.47
   3   4  -4   24.48    3.37
   2   4  -5    2.03    1.25
   2   4  -5   -0.58    1.00
   1   4  -6  805.86   35.17
   0  -4   7    0.82    1.03
   0  -4   7    1.81    1.26
   1  -4   8  830.49   35.08
   1  -4   8  805.54   33.06
   2  -4   9    1.02    1.33
   3  -4  10  194.52   11.11
   4  -4  11    0.37    1.70
   5  -4  12  155.92   10.13
   6  -4  13   -1.36    1.79
   7  -4  14  536.39   26.23
   8  -4  15    3.75    2.66
   9  -4  16  299.03   17.39
  10  -4  17   -0.39    2.29
  11  -4  18   47.34    6.91
  18   4  12   28.55    5.44
  17   4  11    0.13    1.97
  16   4  10    0.49    1.89
  15   4   9    0.16    1.67
  14   4   8    2.52    2.47
  13   4   7    2.31    2.05
  12   4   6  177.82   10.96
  11   4   5   -1.08    1.60
  10   4   4   20.72    3.67
   9   4   3    1.26    1.23
   8   4   2   19.08    2.35
   8   4   2   15.89    3.07
  -7  -4  -1   -0.72    0.63
   7   4   1   -0.17    0.77
   7   4   1    0.20    0.84
   6   4   0  111.17    6.92
  -6  -4   0  103.86    5.36
   6   4   0  106.71    6.33
   5   4  -1    9.69    2.04
   5   4  -1    8.43    2.24
   3   4  -3   -2.38    0.85
   2   4  -4  340.02   16.19
   2   4  -4  332.34   16.05
   1   4  -5   -0.32    1.15
   1   4  -5    0.02    0.73
   0  -4   6   47.76    4.03
   0  -4   6   48.60    4.30
   1  -4   7    0.46    1.02
   1  -4   7    1.08    1.26
   2  -4   8   27.26    3.69
   3  -4   9   -0.22    1.04
   4  -4  10 1337.86   55.55
   5  -4  11    1.04    1.84
   6  -4  12   45.69    5.50
   7  -4  13   -1.84    1.84
   8  -4  14   81.67    7.61
   9  -4  15    1.13    2.24
  10  -4  16    3.22    3.40
  11  -4  17    4.13    2.83
  12  -4  18  132.94   10.88
  17   4  12    1.01    2.05
  16   4  11    0.65    2.08
  15   4  10    5.92    2.57
  14   4   9   -0.37    1.89
  13   4   8  219.33   13.02
  12   4   7    1.06    1.61
  11   4   6  182.06   11.07
  10   4   5   -0.08    1.60
   9   4   4    7.12    2.27
   8   4   3    1.64    1.01
   8   4   3   -0.11    1.04
  -8  -4  -3   -0.41    0.74
  -7  -4  -2  129.08    6.75
   7   4   2  128.79    6.96
   7   4   2  124.06    7.84
   6   4   1    1.29    1.05
   6   4   1    0.20    0.76
  -6  -4  -1   -0.28    0.77
   5   4   0  451.29   19.73
   5   4   0  426.92   19.91
   4   4  -1    2.06    1.44
   4   4  -1    1.88    1.44
   4   4  -1    0.44    1.11
  -4  -4   1    0.15    0.63
  -3  -4   2   95.70    4.70
   3   4  -2  102.05    6.48
   2   4  -3   -0.35    0.69
  -2  -4   3    0.32    0.51
   2   4  -3    0.21    1.29
   1   4  -4    3.31    1.53
   0   4  -5    0.37    0.83
   1  -4   6   41.44    3.92
   1  -4   6   38.95    3.63
   2  -4   7    0.60    1.17
   2  -4   7   -1.25    1.17
   3  -4   8    3.82    1.79
   4  -4   9    0.77    1.27
   5  -4  10   75.50    6.27
   6  -4  11   -0.22    1.89
   7  -4  12   34.02    4.98
   8  -4  13    3.47    2.19
   9  -4  14   12.52    3.43
  10  -4  15    1.73    2.26
  11  -4  16    4.47    3.21
  12  -4  17    5.26    2.94
  17   4  13    1.94    1.83
  16   4  12   75.04    7.28
  15   4  11   -1.28    1.31
  14   4  10   15.28    3.87
  13   4   9   -0.70    1.65
  12   4   8   97.12    7.68
  11   4   7   -1.56    1.26
  10   4   6  606.77   27.66
  -9  -4  -5   -0.35    0.96
   9   4   5    0.84    1.41
  -8  -4  -4   10.05    1.97
   8   4   4   12.34    2.69
  -7  -4  -3    0.46    0.79
   7   4   3    0.00    1.14
   7   4   3   -0.17    0.71
  -6  -4  -2  236.51   11.04
   6   4   2  236.71   12.22
   6   4   2  239.47   11.32
   5   4   1    5.86    1.62
   5   4   1   -0.07    0.88
  -5  -4  -1    0.62    0.95
  -4  -4   0   38.06    2.64
   4   4   0   39.19    3.30
   4   4   0   35.71    3.58
   3   4  -1   16.25    2.37
  -3  -4   1   15.26    1.54
   3   4  -1   17.11    2.65
   2   4  -2  594.47   27.07
   2   4  -2  678.58   27.18
  -2  -4   2  603.81   25.70
   1   4  -3   -0.70    0.78
   0   4  -4  179.32    9.81
   1  -4   5   -1.70    0.78
   1  -4   5   -1.02    0.76
   2  -4   6    6.39    1.93
   2  -4   6    5.41    1.82
   3  -4   7   -0.23    0.99
   4  -4   8  157.62    9.28
   5  -4   9    0.04    1.28
   6  -4  10  735.79   32.80
   7  -4  11   -0.01    1.99
   8  -4  12   71.78    6.58
   9  -4  13   -0.72    1.65
  10  -4  14  115.51    9.27
  11  -4  15    0.08    1.51
  12  -4  16   -0.80    2.13
  13  -4  17   -3.20    1.63
  16   4  13    4.43    2.41
  15   4  12    4.33    2.39
  14   4  11    0.68    1.74
  13   4  10   92.11    7.77
  12   4   9   -0.78    1.42
  11   4   8  357.48   18.28
  10   4   7    1.34    1.87
   9   4   6    1.41    1.72
  -9  -4  -6    2.25    1.30
  -8  -4  -5    2.28    1.40
   8   4   5    0.11    1.09
  -7  -4  -4   53.49    3.89
   7   4   4   45.34    4.29
  -6  -4  -3   -0.84    0.81
   6   4   3    1.27    1.02
   6   4   3    0.48    0.80
   5   4   2 1101.35   43.74
  -5  -4  -2 1038.37   43.60
   5   4   2 1022.64   43.74
  -4  -4  -1   -0.19    0.84
   4   4   1    4.13    1.30
   4   4   1    0.54    1.01
   3   4   0  801.17   32.91
  -3  -4   0  784.47   32.14
   3   4   0  737.41   32.72
  -2  -4   1   26.19    2.07
   1   4  -2  258.10   12.76
   0   4  -3   -0.47    0.51
  -1   4  -4  895.02   37.54
   2  -4   5   -0.56    0.93
   2  -4   5   -0.50    1.09
   3  -4   6 1101.11   45.81
   3  -4   6 1112.88   43.33
   4  -4   7    0.13    1.24
   5  -4   8  638.86   28.27
   6  -4   9   -1.86    1.17
   7  -4  10  168.98   10.55
   8  -4  11   -1.87    1.29
   9  -4  12  419.86   21.41
  10  -4  13   -1.22    2.21
  11  -4  14  135.72   10.35
  12  -4  15    0.82    2.19
  13  -4  16    6.62    3.54
  16   4  14   39.42    6.10
  15   4  13   -2.32    1.64
  14   4  12   24.69    4.81
  13   4  11   11.98    3.25
  12   4  10   29.53    4.94
  11   4   9    0.18    1.80
 -10  -4  -8  143.40    8.77
  10   4   8  152.63    9.66
   9   4   7   -0.50    1.37
  -9  -4  -7   -0.92    0.84
  -8  -4  -6  110.58    6.85
   8   4   6  112.13    7.52
  -7  -4  -5    0.54    1.04
   7   4   5    0.27    0.82
  -6  -4  -4   28.48    2.79
   6   4   4   35.09    3.99
   5   4   3   -0.41    0.72
  -5  -4  -3    0.46    0.88
   5   4   3    0.61    0.81
  -4  -4  -2  222.69   10.73
   4   4   2  232.81   10.83
   4   4   2  228.12   11.73
   3   4   1    0.35    1.11
  -3  -4  -1   -1.61    0.74
  -2  -4   0 1216.25   49.79
   2   4   0 1222.73   49.72
  -1  -4   1   -0.97    0.67
   1   4  -1   -0.50    0.84
   0   4  -2  161.81    8.90
  -1   4  -3   -1.19    0.61
   2  -4   4   26.80    3.33
   2  -4   4   24.31    3.08
   3  -4   5   -0.36    1.19
   3  -4   5    0.09    0.96
   4  -4   6    2.90    1.40
   5  -4   7    0.29    1.19
   6  -4   8  112.35    7.55
   7  -4   9    1.90    1.94
   8  -4  10   51.03    5.43
   9  -4  11    0.66    1.95
  10  -4  12    9.48    3.15
  11  -4  13   -2.26    2.23
  12  -4  14   18.38    4.34
  13  -4  15    0.87    1.96
  14  -4  16  136.90   10.95
  15   4  14    2.60    2.17
  14   4  13   -1.23    1.50
  13   4  12  110.20    8.73
  12   4  11   -0.58    1.71
  11   4  10  280.00   15.46
  10   4   9   -0.31    1.24
 -10  -4  -9    0.09    1.33
   9   4   8   63.79    5.70
  -9  -4  -8   57.98    4.98
   8   4   7   -0.15    1.04
  -8  -4  -7    1.50    1.23
  -7  -4  -6   11.07    2.33
   7   4   6   16.01    3.05
  -6  -4  -5   -1.09    0.90
   6   4   5   -0.70    0.86
  -5  -4  -4  351.65   15.66
   5   4   4  322.87   16.03
  -4  -4  -3    0.56    1.07
   4   4   3    0.54    0.92
   3   4   2  208.63   10.85
  -3  -4  -2  214.62   10.17
   2   4   1   -0.95    0.91
  -2  -4  -1   -1.77    0.70
  -1  -4   0   47.43    3.24
   1   4   0   52.29    4.18
   0   4  -1    0.45    1.12
  -1   4  -2   39.92    3.67
  -2   4  -3   -0.75    0.69
   3  -4   4  363.54   16.89
   3  -4   4  361.35   15.97
   4  -4   5   -1.41    1.01
   4  -4   5    0.23    1.17
   5  -4   6   15.64    2.88
   6  -4   7   -0.35    1.26
   7  -4   8    5.10    2.14
   8  -4   9   -0.18    1.82
   9  -4  10    6.51    2.68
  10  -4  11   -0.99    1.83
  11  -4  12   37.38    5.52
  12  -4  13    0.25    2.19
  13  -4  14   13.85    4.20
  14  -4  15    4.50    2.85
  15   4  15    4.63    2.01
  14   4  14    4.33    2.36
  13   4  13   -2.08    0.92
  12   4  12   91.59    7.71
  11   4  11   -0.21    1.38
  10   4  10   80.67    6.70
 -10  -4 -10   78.26    6.16
  -9  -4  -9    0.02    1.10
   9   4   9   -0.92    1.45
   8   4   8  795.61   35.70
  -8  -4  -8  844.80   36.01
   7   4   7    1.71    1.11
  -7  -4  -7    0.90    1.20
  -6  -4  -6  142.61    7.94
   6   4   6  131.42    8.28
   5   4   5    0.30    0.74
  -5  -4  -5    0.40    1.15
  -4  -4  -4  133.18    7.44
   4   4   4  140.04    8.08
  -3  -4  -3    0.25    0.84
   3   4   3   -0.40    0.91
  -2  -4  -2  173.62    8.54
   2   4   2  168.97    9.10
  -1  -4  -1   -1.26    0.69
   1   4   1   -0.43    1.01
   0   4   0 3844.63  150.27
  -1   4  -1   -0.62    0.92
  -2   4  -2  171.58    9.23
   3  -4   3    0.55    1.08
   3  -4   3    1.33    1.22
   4  -4   4  123.77    7.08
   4  -4   4  129.06    7.56
   5  -4   5    0.31    1.05
   6  -4   6  130.39    8.05
   7  -4   7   -0.13    1.37
   8  -4   8  772.81   33.93
   9  -4   9   -0.29    1.76
  10  -4  10   93.08    7.55
  11  -4  11   -0.23    1.85
  12  -4  12   86.92    7.73
  13  -4  13   13.03    3.59
  14  -4  14    6.21    3.16
  15  -4  15    2.28    2.36
  14   4  15    3.40    2.21
  13   4  14   11.71    3.42
  12   4  13    1.02    2.04
  11   4  12   46.57    5.98
 -10  -4 -11   -1.20    1.47
  10   4  11    1.66    1.81
  -9  -4 -10    4.97    2.29
   9   4  10    4.67    2.04
  -8  -4  -9    1.45    1.43
   8   4   9   -0.81    1.36
  -7  -4  -8    3.83    1.53
   7   4   8    5.03    2.08
   6   4   7    1.15    1.19
  -6  -4  -7   -0.04    1.32
   5   4   6   19.40    3.11
  -5  -4  -6   14.37    2.57
   4   4   5    0.55    0.81
  -4  -4  -5   -0.84    0.93
   3   4   4  353.53   16.79
  -3  -4  -4  372.86   16.66
   2   4   3   -0.69    0.83
  -2  -4  -3   -0.17    0.78
  -1  -4  -2   35.01    2.87
   1   4   2   36.70    3.34
   0   4   1   -0.33    0.80
   0  -4  -1    0.46    0.92
  -1   4   0   41.60    3.60
  -2   4  -1   -1.53    0.76
  -3   4  -2  206.92   10.62
   4  -4   3    1.65    1.11
   4  -4   3    0.04    1.00
   5  -4   4  345.26   16.20
   5  -4   4  341.84   15.25
   6  -4   5    0.09    1.02
   7  -4   6   18.55    3.20
   8  -4   7    2.95    1.71
   9  -4   8   52.28    5.27
  10  -4   9    0.56    1.90
  11  -4  10  306.57   16.62
  12  -4  11   -2.36    1.69
  13  -4  12  123.62    9.59
  14  -4  13    1.25    2.07
  15  -4  14    9.96    3.65
  14   4  16  137.17   10.67
  13   4  15   -0.29    1.54
  12   4  14   21.21    4.47
  11   4  13    0.38    1.60
  10   4  12    8.99    2.89
 -10  -4 -12   16.59    3.34
   9   4  11    0.47    1.36
  -9  -4 -11    2.14    2.27
  -8  -4 -10   47.73    4.77
   8   4  10   50.17    5.09
   7   4   9   -1.19    1.05
  -7  -4  -9   -2.18    1.08
  -6  -4  -8  126.06    7.48
   6   4   8  107.37    7.45
   5   4   7    1.68    1.20
  -5  -4  -7   -0.55    1.20
  -4  -4  -6    5.28    1.93
   4   4   6    5.53    1.64
   3   4   5   -0.26    0.68
  -3  -4  -5    0.44    1.00
   2   4   4   29.33    3.06
  -2  -4  -4   23.96    2.77
   1   4   3   -0.83    0.83
  -1  -4  -3    0.60    0.85
   0  -4  -2  156.19    8.02
   0   4   2  158.47    8.48
  -1   4   1   -0.36    0.82
  -2   4   0 1291.42   52.24
  -3   4  -1   -0.98    0.81
   4  -4   2  225.49   10.63
   4  -4   2  219.81   11.17
   5  -4   3   -0.63    1.14
   5  -4   3    0.24    0.94
   6  -4   4   28.64    3.48
   7  -4   5   -0.39    0.97
   8  -4   6  118.48    7.77
   9  -4   7    1.45    1.55
  10  -4   8  139.35    9.31
  11  -4   9    0.27    2.02
  12  -4  10   23.54    4.51
  13  -4  11   -4.75    1.52
  14  -4  12   30.80    5.45
  15  -4  13   -1.58    2.02
  16  -4  14   32.07    5.75
  13   4  16    5.85    2.82
  12   4  15   -0.05    1.41
  11   4  14  128.78    9.75
 -10  -4 -13    0.26    1.73
  10   4  13   -0.77    1.78
  -9  -4 -12  448.50   22.45
   9   4  12  461.81   22.53
  -8  -4 -11    1.52    1.83
   8   4  11    0.42    1.49
  -7  -4 -10  169.19   10.16
   7   4  10  178.76   10.64
   6   4   9   -0.83    0.97
  -6  -4  -9    1.28    1.31
   5   4   8  676.41   29.61
  -5  -4  -8  675.96   30.06
   4   4   7    0.21    0.78
  -4  -4  -7   -0.02    1.21
  -3  -4  -6 1038.45   44.37
   3   4   6 1065.02   43.46
   2   4   5   -0.14    0.86
  -2  -4  -5    0.93    1.02
   1   4   4  877.10   35.82
  -1  -4  -4  840.16   36.29
   0   4   3    0.10    0.78
   0  -4  -3    0.78    0.90
  -1   4   2  253.38   12.22
  -2   4   1    5.93    1.50
  -3   4   0  763.29   31.94
   5  -4   2 1038.37   42.07
   5  -4   2  998.52   39.62
   6  -4   3   -0.60    1.03
   7  -4   4   54.94    4.49
   8  -4   5    0.19    1.13
   9  -4   6    1.20    1.64
  10  -4   7    2.64    1.96
  11  -4   8  380.50   19.21
  12  -4   9    8.30    2.92
  13  -4  10  101.97    8.33
  14  -4  11    1.25    2.43
  15  -4  12    9.02    3.63
  16  -4  13    0.55    1.89
  16  -4  13   -0.55    2.21
  13   4  17    2.77    1.54
  12   4  16    1.65    1.92
  11   4  15    1.45    1.98
 -10  -4 -14  104.28    8.11
  10   4  14  101.52    8.26
   9   4  13    1.79    2.15
  -9  -4 -13   -0.78    1.59
  -8  -4 -12   83.92    6.80
   8   4  12   75.96    6.66
   7   4  11    0.07    1.71
  -7  -4 -11    1.98    1.85
  -6  -4 -10  719.72   32.92
   6   4  10  761.71   32.71
   5   4   9    4.46    1.40
  -5  -4  -9    2.11    1.61
   4   4   8  147.77    8.97
  -4  -4  -8  165.12    9.19
   3   4   7    2.85    1.19
  -3  -4  -7    0.05    1.11
   2   4   6    6.53    1.79
  -2  -4  -6    8.28    2.01
  -1  -4  -5    1.35    1.09
   1   4   5    0.10    0.88
   0   4   4  169.35    9.00
   0  -4  -4  176.90    8.99
  -1   4   3    0.34    0.78
   1  -4  -3    2.41    1.06
  -2   4   2  652.74   27.61
  -3   4   1    8.53    1.70
  -4   4   0    2.00    0.90
   5  -4   1   -0.40    1.06
   5  -4   1   -2.02    0.94
   6  -4   2  213.16   10.25
   6  -4   2  212.51   10.80
   7  -4   3   -1.12    0.92
   8  -4   4    8.07    2.19
   9  -4   5   -0.58    1.29
  10  -4   6  556.11   25.34
  11  -4   7    2.77    2.02
  12  -4   8   98.63    7.66
  13  -4   9    0.59    1.95
  14  -4  10   16.53    4.32
  15  -4  11    1.52    2.25
  16  -4  12   83.20    7.80
  16  -4  12   71.47    7.26
  17  -4  13    0.59    2.06
  17  -4  13    2.11    2.67
  12   4  17    3.95    2.23
  11   4  16    7.70    2.96
 -10  -4 -15   -0.76    1.91
  10   4  15   -1.78    1.58
   9   4  14    1.82    1.93
  -9  -4 -14   -2.32    1.73
  -8  -4 -13   -0.82    1.67
   8   4  13   -1.00    1.26
   7   4  12   32.42    4.75
  -7  -4 -12   36.39    4.82
  -6  -4 -11    0.35    1.73
   6   4  11    1.81    1.69
   5   4  10   76.59    5.94
  -5  -4 -10   77.04    6.13
  -4  -4  -9   -0.02    1.42
   4   4   9    0.38    1.16
   3   4   8    5.54    1.75
  -3  -4  -8    3.57    1.64
  -2  -4  -7   -0.95    0.97
   2   4   7    0.79    0.99
  -1  -4  -6   37.25    3.46
   1   4   6   41.93    3.64
   0   4   5   -0.95    0.76
   0  -4  -5    0.20    1.01
  -1   4   4    3.96    1.23
   1  -4  -4    5.18    1.52
  -2   4   3   -0.45    0.27
  -3   4   2    5.47    1.28
  -4   4   1    0.58    0.67
   5  -4   0  427.16   18.24
   5  -4   0  449.81   19.48
   6  -4   1   -1.14    0.96
   6  -4   1   -1.40    1.02
   7  -4   2  121.72    7.24
   8  -4   3    0.36    1.21
   9  -4   4    8.65    2.12
  10  -4   5   -0.45    1.27
  11  -4   6  175.82   10.48
  12  -4   7   -1.41    1.68
  13  -4   8  228.09   13.30
  14  -4   9   -2.67    1.74
  15  -4  10    6.35    3.18
  16  -4  11   -0.44    2.13
  16  -4  11    3.38    2.84
  17  -4  12   -2.73    1.86
  17  -4  12    2.85    2.29
  12   4  18  110.10    9.35
  11   4  17    2.78    2.04
  10   4  16    6.60    2.71
 -10  -4 -16    5.31    2.48
   9   4  15    0.71    1.75
  -9  -4 -15    1.04    2.05
  -8  -4 -14   81.98    6.98
   8   4  14   72.28    6.65
  -7  -4 -13    0.36    1.73
   7   4  13   -0.88    1.72
   6   4  12   48.61    5.49
  -6  -4 -12   41.00    5.03
  -5  -4 -11   -1.16    1.71
   5   4  11    0.82    1.38
   4   4  10 1415.59   59.10
  -4  -4 -10 1466.20   61.10
  -3  -4  -9    0.33    1.10
   3   4   9   -0.35    0.96
   2   4   8   29.03    3.41
  -2  -4  -8   25.97    3.36
   1   4   7   -0.38    0.77
  -1  -4  -7    0.15    1.24
   0   4   6   41.48    3.58
   0  -4  -6   44.62    3.97
   0  -4  -6   44.86    2.91
   1  -4  -5    0.32    0.95
  -1   4   5    0.10    0.47
   2  -4  -4  308.54   14.02
  -2   4   4  278.33   13.50
  -3   4   3   -0.14    0.62
  -4   4   2 1818.95   72.22
  -5   4   1    3.61    1.29
   6  -4   0  102.71    6.07
   6  -4   0   90.56    5.57
   7  -4   1   -1.00    1.11
   7  -4   1   -0.06    1.02
   8  -4   2   17.03    2.66
   9  -4   3    0.30    1.07
  10  -4   4   18.65    3.05
  11  -4   5    1.73    1.71
  12  -4   6  169.32   10.39
  13  -4   7    1.01    2.26
  14  -4   8    7.79    3.05
  15  -4   9    3.05    2.46
  15  -4   9    0.20    1.91
  16  -4  10    3.37    2.44
  16  -4  10    2.11    2.54
  17  -4  11    3.09    2.53
  17  -4  11   -1.86    1.41
  18  -4  12   37.16    6.09
  18  -4  12   38.09    6.18
  11   4  18   36.96    5.63
 -10  -4 -17    0.28    1.91
  10   4  17   -1.46    1.50
  -9  -4 -16  333.89   17.89
   9   4  16  278.84   16.97
   8   4  15   -0.13    1.73
  -8  -4 -15    0.02    2.02
   7   4  14  568.48   27.32
  -7  -4 -14  581.95   27.81
   6   4  13   -0.02    1.44
  -6  -4 -13    1.43    1.97
  -5  -4 -12  154.06    9.86
   5   4  12  157.21    9.79
   4   4  11    1.91    1.62
  -4  -4 -11    0.40    1.51
  -3  -4 -10  208.25   11.57
   3   4  10  200.15   11.09
   2   4   9    1.21    0.92
  -2  -4  -9    0.21    1.07
  -1  -4  -8  776.40   33.76
   1   4   8  764.03   32.53
   0   4   7   -0.29    0.39
   0  -4  -7   -0.41    1.00
   1  -4  -6  742.45   30.38
   1  -4  -6  725.44   28.95
  -1   4   6  609.54   28.94
  -2   4   5    0.35    0.69
   2  -4  -5   -0.46    0.89
  -3   4   4   25.32    2.81
  -4   4   3   -0.44    0.73
  -5   4   2 1176.17   47.49
   6  -4  -1   -0.06    1.00
   6  -4  -1   -0.70    1.02
   7  -4   0  583.83   23.29
   7  -4   0  564.89   24.52
   8  -4   1    0.42    1.14
   9  -4   2  343.83   16.08
  10  -4   3    0.24    1.15
  11  -4   4    1.72    1.61
  12  -4   5    4.15    1.95
  13  -4   6  350.02   17.76
  14  -4   7   -0.46    1.97
  14  -4   7    0.38    1.93
  15  -4   8  292.61   16.20
  15  -4   8  294.97   16.93
  16  -4   9    1.15    1.98
  16  -4   9   -0.57    2.00
  17  -4  10    1.85    2.83
  17  -4  10   -1.08    1.75
  18  -4  11    2.65    2.33
  18  -4  11    3.01    2.72
 -10  -4 -18  136.04   10.10
  10   4  18  122.98    9.87
   9   4  17    0.10    1.73
  -9  -4 -17    2.85    2.16
   8   4  16   12.33    3.38
  -8  -4 -16    9.69    3.51
   7   4  15   -0.22    1.33
  -7  -4 -15   -0.51    1.87
  -6  -4 -14  470.13   23.52
   6   4  14  488.04   23.48
  -5  -4 -13    2.31    2.28
   5   4  13    2.93    1.99
  -4  -4 -12  114.58    8.18
   4   4  12  115.10    7.89
   3   4  11    1.35    1.20
  -3  -4 -11    1.08    1.44
   2   4  10  122.87    7.54
  -2  -4 -10  118.66    7.80
   1   4   9   -0.86    0.72
  -1  -4  -9    0.03    1.10
   0  -4  -8   -0.36    0.97
   0   4   8   -0.42    0.36
  -1   4   7   -0.09    0.80
   1  -4  -7    1.00    1.31
   1  -4  -7    0.05    1.04
   2  -4  -6  194.28   10.38
  -2   4   6  205.39    9.93
   2  -4  -6  194.81    9.46
   3  -4  -5   -1.03    0.92
   4  -4  -4 1278.77   53.12
  -4   4   4 1294.62   51.65
  -5   4   3   -1.18    0.76
   7  -4  -1   -1.25    1.06
   7  -4  -1   -1.16    1.04
   8  -4   0    1.97    1.35
   9  -4   1    0.32    1.26
  10  -4   2  108.77    6.94
  11  -4   3   -0.37    1.38
  12  -4   4 1018.51   43.12
  13  -4   5    2.30    2.12
  13  -4   5    0.17    1.46
  14  -4   6   69.41    6.36
  14  -4   6   65.58    6.38
  15  -4   7    3.68    2.35
  15  -4   7   -0.33    1.93
  16  -4   8   68.01    6.53
  16  -4   8   62.97    6.67
  17  -4   9    0.36    2.42
  17  -4   9    1.51    2.49
  18  -4  10    0.53    2.47
  18  -4  10    2.46    2.14
 -10  -4 -19    2.54    2.18
  10   4  19    0.77    1.54
   9   4  18    7.27    3.04
  -9  -4 -18   16.47    4.08
  -8  -4 -17    0.58    2.00
   8   4  17    0.28    1.74
  -7  -4 -16   57.09    6.59
   7   4  16   53.04    6.35
  -6  -4 -15    1.35    2.17
   6   4  15    0.80    1.98
   5   4  14  181.42   11.20
  -5  -4 -14  182.66   11.48
   4   4  13   -1.16    1.38
  -4  -4 -13    3.75    2.24
   3   4  12    4.99    1.85
  -3  -4 -12   -1.42    1.75
  -2  -4 -11    0.43    1.27
   2   4  11    0.25    0.93
  -1  -4 -10   46.45    4.49
   0   4   9    1.33    0.87
   0  -4  -9    0.90    1.17
  -1   4   8    4.76    1.58
   1  -4  -8    2.32    1.36
  -2   4   7    0.13    0.75
   2  -4  -7   -0.73    1.10
   2  -4  -7   -0.23    0.98
   3  -4  -6   92.12    5.91
   3  -4  -6   80.86    5.04
  -3   4   6   81.81    5.12
  -4   4   5   -0.01    0.69
   4  -4  -5   -0.01    1.21
   5  -4  -4  109.59    6.70
  -5   4   4  118.45    6.40
  -6   4   3   -0.26    0.91
   6  -4  -3   -0.29    1.48
   7  -4  -2  256.00   11.74
   7  -4  -2  277.59   13.45
   7  -4  -2  264.18   12.45
   8  -4  -1   -2.13    1.30
   8  -4  -1   -1.43    1.04
   8  -4  -1    0.22    0.97
   9  -4   0  196.04    9.96
   9  -4   0  193.05   10.98
  10  -4   1    0.25    1.18
  10  -4   1    2.14    1.71
  11  -4   2   -0.54    1.22
  11  -4   2    1.56    1.92
  12  -4   3    0.22    1.52
  12  -4   3   -1.01    1.96
  13  -4   4  141.37    9.46
  13  -4   4  124.88    8.49
  14  -4   5   -1.11    1.89
  14  -4   5    2.43    1.91
  15  -4   6   12.74    3.67
  15  -4   6   10.82    3.58
  16  -4   7   -1.28    1.85
  16  -4   7    0.89    2.06
  17  -4   8    1.50    2.09
  18  -4   9    1.20    2.32
  19  -4  10    4.68    3.06
   9   4  19    2.18    2.36
  -9  -4 -19    0.24    1.87
   8   4  18   79.81    7.53
  -8  -4 -18   93.85    8.23
  -7  -4 -17   -0.29    2.09
   7   4  17    2.28    1.97
   6   4  16   26.91    4.71
  -6  -4 -16   21.57    4.50
   5   4  15   -1.45    1.66
  -5  -4 -15   -1.50    1.67
   4   4  14  395.22   19.35
  -4  -4 -14  374.97   19.75
  -3  -4 -13    0.39    1.92
   3   4  13    2.38    1.69
  -2  -4 -12 1515.63   63.35
   2   4  12 1453.92   60.66
  -1  -4 -11   -0.29    1.14
   1   4  11    0.79    0.53
   0  -4 -10   24.87    3.70
   0   4  10   31.84    3.11
   1  -4  -9   -0.39    1.19
  -1   4   9    0.05    0.70
   2  -4  -8  165.51    9.40
  -2   4   8  166.69    8.64
   3  -4  -7    0.21    1.18
   3  -4  -7    0.51    1.11
  -3   4   7    0.56    0.75
   4  -4  -6  270.99   12.79
   4  -4  -6  265.93   13.35
  -4   4   6  273.60   12.53
   5  -4  -5    0.29    1.36
  -5   4   5    1.18    0.80
   6  -4  -4 1129.91   47.52
  -6   4   4 1138.32   45.66
   7  -4  -3    0.68    1.05
   7  -4  -3   -0.49    1.44
   7  -4  -3    0.86    1.09
   8  -4  -2    1.48    1.52
   8  -4  -2    0.87    1.02
   8  -4  -2    0.85    1.23
   9  -4  -1    3.55    2.13
   9  -4  -1   -0.71    1.04
  10  -4   0  116.27    7.79
  10  -4   0  111.82    6.73
  11  -4   1    1.06    1.92
  11  -4   1    0.65    1.36
  12  -4   2    2.94    2.44
  12  -4   2   12.85    2.81
  13  -4   3   -0.46    2.13
  13  -4   3   -0.94    1.25
  14  -4   4  872.45   39.12
  14  -4   4  843.21   37.10
  15  -4   5   -0.59    1.98
  15  -4   5    2.83    2.48
  16  -4   6    9.27    3.40
  17  -4   7    1.80    2.13
  18  -4   8   99.10    8.78
  19  -4   9    3.33    2.52
   8   4  19    0.68    1.82
  -8  -4 -19   -0.40    2.04
  -7  -4 -18   60.63    7.00
   7   4  18   40.96    5.82
   6   4  17    1.16    2.01
  -6  -4 -17    0.91    2.19
  -5  -4 -16  519.91   26.22
   5   4  16  554.40   26.00
   4   4  15    0.88    1.73
  -4  -4 -15    0.41    2.00
  -3  -4 -14    1.87    2.08
   3   4  14    0.23    1.48
  -2  -4 -13    0.03    1.90
   2   4  13    0.58    0.98
   0  -4 -11   -1.65    1.00
   0   4  11    0.51    0.76
  -1   4  10  311.77   14.67
   1  -4 -10  308.27   15.69
   2  -4  -9   -1.02    1.33
  -2   4   9   -0.68    0.76
   3  -4  -8  651.92   29.74
   3  -4  -8  668.02   28.49
  -3   4   8  690.78   28.25
  -4   4   7    0.20    0.78
   4  -4  -7   -0.98    0.94
   4  -4  -7   -0.07    1.23
   5  -4  -6    6.73    2.00
  -5   4   6    5.43    1.47
  -6   4   5    0.56    0.67
   6  -4  -5   -0.58    1.32
   7  -4  -4 1463.60   60.67
  -7   4   4 1453.94   58.02
   8  -4  -3   -1.04    1.38
   8  -4  -3   -0.19    0.83
   8  -4  -3   -0.49    0.94
   9  -4  -2 1826.38   74.78
   9  -4  -2 1775.21   71.34
  10  -4  -1    6.55    2.25
  10  -4  -1    1.90    1.21
  11  -4   0  110.79    7.91
  11  -4   0  117.69    7.01
  12  -4   1   -1.59    1.91
  12  -4   1    2.08    1.78
  13  -4   2  444.59   22.13
  14  -4   3   -0.85    2.04
  15  -4   4  666.00   31.71
  16  -4   5    0.39    2.19
  17  -4   6  272.76   16.36
  18  -4   7    0.50    2.37
  19  -4   8   -0.62    2.15
   8   4  20    7.97    3.14
  -8  -4 -20   11.51    3.58
  -7  -4 -19    0.17    2.27
   7   4  19   -0.73    1.61
  -6  -4 -18    0.20    2.02
   6   4  18    3.42    2.24
   5   4  17    2.58    1.81
  -5  -4 -17    3.04    2.41
   4   4  16  341.23   17.64
  -4  -4 -16  318.51   17.93
  -3  -4 -15    1.58    1.99
   3   4  15    0.66    1.58
   2   4  14   87.87    6.53
  -1  -4 -13    1.29    1.99
   1   4  13   -0.45    0.76
   0  -4 -12   71.89    6.26
   0   4  12   77.94    5.49
   1  -4 -11    2.02    1.62
  -1   4  11   -0.23    0.79
  -2   4  10    8.95    2.00
   2  -4 -10   14.07    2.95
  -3   4   9    0.03    0.90
   3  -4  -9    0.68    1.27
   4  -4  -8  395.48   17.66
   4  -4  -8  397.98   18.87
  -4   4   8  381.63   17.13
   5  -4  -7   -0.65    1.18
   5  -4  -7    1.86    1.44
  -5   4   7    0.47    0.69
  -6   4   6  162.37    7.97
   6  -4  -6  152.79    8.65
  -7   4   5    0.13    0.80
   7  -4  -5   -2.38    1.56
   8  -4  -4  207.93    9.49
   8  -4  -4  210.10   10.05
   8  -4  -4  208.08   11.16
   9  -4  -3    5.19    2.21
  10  -4  -2   15.65    3.16
  11  -4  -1    7.22    2.60
  12  -4   0  188.70   11.39
  13  -4   1   -0.30    2.37
  14  -4   2   27.27    4.69
  15  -4   3   -2.41    1.70
  16  -4   4  103.74    8.68
  17  -4   5   -0.56    2.43
  18  -4   6   26.82    5.38
  19  -4   7   -2.42    1.48
  20  -4   8    5.70    3.07
   7   4  20  113.66    9.35
  -7  -4 -20  139.67   10.48
   6   4  19    0.51    1.63
  -6  -4 -19    0.96    2.23
  -5  -4 -18  181.07   11.94
   5   4  18  171.93   11.56
  -4  -4 -17   -0.46    2.28
   4   4  17   -0.72    1.21
  -3  -4 -16  199.35   12.51
   3   4  16  190.58   11.69
   2   4  15    0.66    0.97
  -2  -4 -15    0.62    1.76
  -1  -4 -14  190.03   11.91
   1   4  14  207.42   11.31
   0  -4 -13   -1.47    1.50
   0   4  13    1.48    1.23
  -1   4  12  164.96    9.13
   1  -4 -12  168.20   10.35
   2  -4 -11    0.12    1.61
  -2   4  11    0.27    0.82
  -3   4  10  233.54   11.63
   3  -4 -10  250.90   13.11
  -4   4   9    0.08    0.64
   4  -4  -9   -0.49    1.04
   5  -4  -8  123.80    7.00
   5  -4  -8  126.95    7.83
  -5   4   8  109.71    6.37
   6  -4  -7    1.42    1.58
  -6   4   7   -0.49    0.59
   7  -4  -6   20.95    3.03
   8  -4  -5    2.14    1.68
   9  -4  -4   90.33    6.45
  10  -4  -3    0.67    1.80
  11  -4  -2   88.47    6.75
  12  -4  -1    7.82    2.91
  13  -4   0  431.36   21.60
  14  -4   1   -0.24    2.02
  15  -4   2  133.13    9.68
  16  -4   3    3.25    2.88
  17  -4   4   50.48    6.54
  18  -4   5   -0.24    2.07
  19  -4   6    1.08    2.41
  20  -4   7   -1.39    1.95
  -6  -4 -20    3.28    2.68
   6   4  20    2.94    2.08
  -5  -4 -19   -0.95    1.76
   5   4  19    2.54    2.31
   4   4  18  131.31    9.56
  -4  -4 -18  136.08    9.95
   3   4  17   -1.93    1.43
  -3  -4 -17    1.17    2.26
  -1  -4 -15   -2.45    1.50
   1   4  15   -1.04    1.09
   0   4  14  177.15   10.03
   0  -4 -14  176.90   11.03
   1  -4 -13   -0.15    1.89
  -1   4  13   -0.09    0.82
   2  -4 -12  128.52    8.75
  -2   4  12  131.27    7.56
   3  -4 -11   -1.05    1.43
  -3   4  11    0.00    0.83
   4  -4 -10   23.07    3.65
  -4   4  10   27.61    2.61
   5  -4  -9   -0.89    1.31
   5  -4  -9    0.80    1.20
   6  -4  -8  431.66   19.38
   6  -4  -8  411.91   19.92
   7  -4  -7   -1.73    1.44
   8  -4  -6  514.17   23.37
   9  -4  -5   -0.33    1.52
  10  -4  -4  133.11    8.51
  11  -4  -3    4.36    2.16
  12  -4  -2   22.73    3.99
  13  -4  -1   18.71    4.00
  14  -4   0  497.67   24.53
  15  -4   1   -0.98    2.21
  16  -4   2  441.84   22.93
  17  -4   3   -1.93    1.94
  18  -4   4  148.02   11.04
  19  -4   5   -2.31    2.08
  20  -4   6   23.68    5.15
   6   4  21    2.45    2.10
  -6  -4 -21    2.50    2.15
   5   4  20   27.35    4.92
  -5  -4 -20   42.28    6.22
  -4  -4 -19    0.83    2.18
   4   4  19    2.09    1.92
  -3  -4 -18   17.39    4.27
   3   4  18   18.66    3.68
   2   4  17    0.94    1.15
  -2  -4 -17    0.44    2.39
   1   4  16    5.34    2.38
  -1  -4 -16    3.13    2.43
   0  -4 -15   -0.40    1.55
   0   4  15    2.44    1.36
   1  -4 -14  130.38    9.23
  -1   4  14  133.22    8.11
  -2   4  13    1.05    0.77
   2  -4 -13   -1.56    1.73
   3  -4 -12 1385.96   59.42
   4  -4 -11   -2.89    1.37
   5  -4 -10  509.84   24.01
   6  -4  -9   -0.60    1.69
   6  -4  -9    0.96    1.41
   7  -4  -8    2.14    1.70
   8  -4  -7   -0.10    1.35
   9  -4  -6  282.72   14.31
  10  -4  -5   -0.55    1.62
  11  -4  -4  356.73   17.80
  12  -4  -3   -1.67    2.01
  13  -4  -2  133.18    9.20
  14  -4  -1    9.31    3.32
  15  -4   0    9.02    3.22
  16  -4   1   -3.17    2.49
  17  -4   2  628.72   30.73
  18  -4   3    1.36    2.63
  19  -4   4  319.39   18.63
  20  -4   5    4.42    2.61
  21  -4   6    1.50    2.20
   5   4  21   -1.73    1.40
  -5  -4 -21   -0.89    1.48
  -4  -4 -20    3.41    2.75
   4   4  20    3.71    2.57
   3   4  19    1.38    1.49
  -3  -4 -19    0.53    2.30
  -2  -4 -18    2.46    2.70
   2   4  18   -0.66    1.67
   1   4  17    2.39    1.61
  -1  -4 -17    0.96    2.19
   0  -4 -16   35.65    5.33
   1  -4 -15   -0.46    1.89
   2  -4 -14  244.69   14.03
   3  -4 -13   -0.38    1.72
   4  -4 -12  363.03   18.63
   5  -4 -11   -0.59    1.55
   6  -4 -10  155.14    9.71
   6  -4 -10  154.63    8.90
   7  -4  -9    1.37    1.70
   7  -4  -9   -0.16    1.30
   8  -4  -8   -0.10    1.35
   9  -4  -7   -0.32    1.57
  10  -4  -6   40.12    4.22
  11  -4  -5    6.07    2.19
  12  -4  -4   12.57    3.35
  13  -4  -3    3.16    2.49
  14  -4  -2   64.84    6.10
  15  -4  -1   -1.91    2.10
  16  -4   0  142.45   10.31
  17  -4   1   -1.22    2.73
  18  -4   2  420.29   22.45
  19  -4   3   -0.06    2.09
  20  -4   4   13.84    4.37
  21  -4   5   -0.09    1.73
  -4  -4 -21    0.15    1.71
  -3  -4 -20  124.96    9.82
  -2  -4 -19    0.85    2.41
  -1  -4 -18  161.29   11.35
   0  -4 -17    1.92    2.31
   1  -4 -16   66.22    6.35
   2  -4 -15   -0.30    1.71
   3  -4 -14  211.02   12.66
   4  -4 -13    1.57    1.96
   5  -4 -12   81.67    6.77
   6  -4 -11    0.19    1.75
   7  -4 -10  431.32   21.25
   7  -4 -10  438.27   20.33
   8  -4  -9   -0.08    1.44
   9  -4  -8    3.79    1.97
  10  -4  -7    1.49    1.71
  11  -4  -6   50.12    4.92
  12  -4  -5   -0.21    2.03
  13  -4  -4    3.30    2.39
  14  -4  -3    0.98    2.05
  15  -4  -2   70.44    6.65
  16  -4  -1   -0.53    2.36
  17  -4   0   53.18    6.72
  18  -4   1    2.09    2.62
  19  -4   2    4.48    2.91
  20  -4   3   -4.29    1.66
  21  -4   4   21.62    4.71
  -3  -4 -21   -1.08    1.84
  -2  -4 -20    4.34    2.69
  -1  -4 -19   -0.51    2.05
   0  -4 -18  215.48   13.73
   1  -4 -17    0.32    1.94
   2  -4 -16   52.83    6.32
   3  -4 -15    0.76    2.18
   4  -4 -14  397.24   20.42
   5  -4 -13    1.48    1.74
   6  -4 -12   12.12    3.18
   7  -4 -11   -0.12    1.78
   8  -4 -10    6.97    2.21
   8  -4 -10   11.93    3.13
   9  -4  -9   -0.11    1.67
  10  -4  -8  312.19   15.85
  11  -4  -7   -0.46    1.83
  12  -4  -6   30.69    4.44
  13  -4  -5   -1.48    1.86
  14  -4  -4    2.38    2.08
  15  -4  -3    3.56    2.63
  16  -4  -2  169.33   11.37
  17  -4  -1   -5.24    1.89
  18  -4   0  200.10   13.19
  19  -4   1   -1.17    2.00
  20  -4   2    4.37    2.71
  21  -4   3    1.80    2.11
  -2  -4 -21    2.68    2.25
  -1  -4 -20    8.14    3.23
   0  -4 -19    0.09    1.91
   1  -4 -18   -0.23    2.42
   2  -4 -17    2.23    2.30
   3  -4 -16    2.98    2.35
   4  -4 -15   -1.87    1.60
   5  -4 -14   70.67    6.44
   6  -4 -13    3.17    2.03
   7  -4 -12   20.51    3.77
   8  -4 -11   -1.20    1.50
   8  -4 -11   -0.20    1.61
   9  -4 -10   16.76    3.34
  10  -4  -9   -0.19    1.50
  11  -4  -8  173.17   10.46
  12  -4  -7    0.66    2.01
  13  -4  -6   78.15    6.60
  14  -4  -5    2.33    2.16
  15  -4  -4   28.69    4.72
  16  -4  -3   -1.09    2.11
  17  -4  -2   25.79    5.02
  18  -4  -1   -2.51    2.29
  19  -4   0   27.53    5.49
  20  -4   1    4.52    2.54
  21  -4   2    6.89    3.19
  -1  -4 -21   -1.36    1.97
   0  -4 -20    2.01    2.42
   1  -4 -19   -0.54    2.06
   2  -4 -18  304.30   17.36
   3  -4 -17    1.22    2.19
   4  -4 -16   85.81    7.72
   5  -4 -15    0.13    1.80
   6  -4 -14   17.09    3.90
   7  -4 -13    2.59    1.96
   8  -4 -12    8.96    2.91
   9  -4 -11   -0.76    1.39
   9  -4 -11    2.06    2.17
  10  -4 -10   22.46    3.84
  11  -4  -9   -1.38    2.13
  12  -4  -8  162.40   10.26
  13  -4  -7   -1.01    1.87
  14  -4  -6    3.50    2.51
  15  -4  -5    2.95    2.22
  16  -4  -4    4.02    2.60
  17  -4  -3   -0.25    2.46
  18  -4  -2   24.35    4.98
  19  -4  -1    1.32    2.58
  20  -4   0   34.64    5.87
  21  -4   1    0.51    2.00
  22  -4   2   28.47    5.60
  -1  -4 -22   64.64    7.10
   0  -4 -21   -1.93    2.02
   1  -4 -20   66.78    7.11
   2  -4 -19   -1.10    2.04
   3  -4 -18  124.54    9.64
   4  -4 -17    3.52    2.42
   5  -4 -16  359.67   19.42
   6  -4 -15   -1.29    1.59
   7  -4 -14  244.83   14.34
   8  -4 -13   -1.94    1.62
   9  -4 -12   70.73    6.49
  10  -4 -11    0.91    1.95
  10  -4 -11   -0.40    1.47
  11  -4 -10  263.97   14.51
  12  -4  -9    0.50    2.46
  13  -4  -8  366.63   19.05
  14  -4  -7    1.37    2.17
  15  -4  -6   57.83    5.90
  16  -4  -5    2.59    2.67
  17  -4  -4   10.90    3.88
  18  -4  -3   -4.10    2.12
  19  -4  -2   75.88    7.75
  20  -4  -1    0.41    2.72
  21  -4   0  266.69   16.70
  22  -4   1   -0.96    2.21
   0  -4 -22   13.31    3.72
   1  -4 -21    3.00    2.72
   2  -4 -20  103.31    8.99
   3  -4 -19   -2.90    1.69
   4  -4 -18    0.01    1.85
   5  -4 -17   -0.33    1.69
   6  -4 -16   71.20    6.84
   7  -4 -15   -1.90    1.57
   8  -4 -14   16.57    3.81
   9  -4 -13   -1.22    1.56
  10  -4 -12  920.46   40.15
  10  -4 -12  878.50   40.53
  11  -4 -11   -0.01    2.43
  12  -4 -10   72.95    6.87
  13  -4  -9    0.84    2.15
  14  -4  -8   94.72    7.79
  15  -4  -7   -1.01    1.88
  16  -4  -6   39.92    5.63
  17  -4  -5   -1.49    2.15
  18  -4  -4   73.68    7.27
  19  -4  -3    0.82    2.99
  20  -4  -2   20.62    4.86
  21  -4  -1   -0.19    2.59
  22  -4   0  248.90   16.21
   1  -4 -22   25.87    5.15
   2  -4 -21   -1.49    1.74
   3  -4 -20   10.30    3.61
   4  -4 -19    2.79    2.29
   5  -4 -18    0.57    1.98
   6  -4 -17    1.65    2.02
   7  -4 -16   69.63    6.79
   8  -4 -15   -0.27    1.95
   9  -4 -14   39.97    5.51
  10  -4 -13   -1.06    1.71
  11  -4 -12  272.03   15.25
  11  -4 -12  271.08   15.23
  12  -4 -11    2.22    2.85
  13  -4 -10    6.92    2.88
  14  -4  -9    1.80    2.39
  15  -4  -8   65.80    6.51
  16  -4  -7    1.61    2.69
  17  -4  -6   12.26    3.96
  18  -4  -5   -2.24    1.86
  19  -4  -4   25.10    5.13
  20  -4  -3    2.37    2.78
  21  -4  -2   90.86    8.52
  22  -4  -1    0.91    2.49
   2  -4 -22   10.95    3.42
   3  -4 -21    0.52    2.19
   4  -4 -20  338.41   19.37
   5  -4 -19   -2.23    1.74
   6  -4 -18   73.06    7.10
   7  -4 -17    1.51    2.28
   8  -4 -16   58.35    6.89
   9  -4 -15    0.38    1.97
  10  -4 -14   14.35    3.84
  11  -4 -13    1.27    2.03
  12  -4 -12  256.61   16.10
  12  -4 -12  347.02   16.89
  13  -4 -11    3.51    2.94
  14  -4 -10  448.51   22.83
  15  -4  -9    1.19    2.60
  16  -4  -8  214.48   13.38
  17  -4  -7    3.63    2.86
  18  -4  -6    1.13    2.63
  19  -4  -5   -0.83    2.60
  20  -4  -4   57.32    7.35
  21  -4  -3    2.65    2.59
  22  -4  -2   23.78    5.25
   3  -4 -22   23.31    5.18
   4  -4 -21   -3.45    1.36
   5  -4 -20   64.64    6.90
   6  -4 -19    1.15    2.08
   7  -4 -18  191.37   12.85
   8  -4 -17   -0.41    1.54
   9  -4 -16  178.93   12.08
  10  -4 -15   -0.68    1.98
  11  -4 -14    5.20    2.65
  12  -4 -13    2.93    2.24
  13  -4 -12  280.03   16.04
  14  -4 -11    0.82    2.71
  15  -4 -10  907.39   41.57
  16  -4  -9    2.86    3.13
  17  -4  -8  120.22    9.70
  18  -4  -7    0.62    2.24
  19  -4  -6   21.62    5.07
  20  -4  -5    0.97    2.92
  21  -4  -4  101.01    9.35
  22  -4  -3    4.25    2.90
   5  -4 -21    2.90    2.40
   6  -4 -20    5.95    3.34
   7  -4 -19    3.39    2.53
   8  -4 -18   38.11    5.85
   9  -4 -17    2.96    2.17
  10  -4 -16   34.78    5.42
  11  -4 -15   -1.15    1.55
  12  -4 -14  138.52   10.16
  13  -4 -13   -0.81    2.28
  13  -4 -13   -0.38    1.87
  14  -4 -12   25.97    5.02
  15  -4 -11   -3.34    2.55
  16  -4 -10  345.53   19.22
  17  -4  -9   -3.03    2.24
  18  -4  -8    2.73    2.74
  19  -4  -7   -1.61    2.34
  20  -4  -6   19.74    4.72
  21  -4  -5   -1.74    2.08
   6  -4 -21    2.77    2.41
   7  -4 -20   35.52    6.08
   8  -4 -19    1.62    2.07
   9  -4 -18   25.98    5.12
  10  -4 -17   -0.12    2.60
  11  -4 -16   11.69    3.80
  12  -4 -15   -0.20    1.87
  13  -4 -14   12.70    3.51
  14  -4 -13    1.20    2.59
  14  -4 -13   -1.46    1.37
  15  -4 -12    8.71    3.72
  16  -4 -11   -0.21    2.63
  17  -4 -10   22.33    4.92
  18  -4  -9   -0.91    2.79
  19  -4  -8   41.36    6.58
  20  -4  -7   -0.65    2.59
  21  -4  -6   46.85    6.99
   7  -4 -21    0.75    1.83
   8  -4 -20   11.08    3.72
   9  -4 -19    2.49    2.31
  10  -4 -18   -2.29    1.57
  11  -4 -17   -0.28    2.19
  12  -4 -16   40.69    6.00
  13  -4 -15   -0.49    2.02
  14  -4 -14  385.89   20.69
  15  -4 -13    1.38    2.81
  16  -4 -12    2.71    3.40
  17  -4 -11    1.56    2.59
  18  -4 -10   73.74    7.87
  19  -4  -9    2.53    2.97
  20  -4  -8   33.81    6.36
  21  -4  -7   -0.07    2.81
   9  -4 -20  323.61   19.17
  10  -4 -19    2.38    2.35
  11  -4 -18   37.25    6.13
  12  -4 -17   -0.28    1.56
  13  -4 -16    6.43    2.69
  14  -4 -15    2.52    2.22
  15  -4 -14  125.53    9.45
  15  -4 -14  124.88    9.81
  16  -4 -13   -3.17    2.25
  17  -4 -12   99.33    9.01
  18  -4 -11    3.56    2.84
  19  -4 -10    2.53    3.12
  20  -4  -9    1.74    2.76
  21  -4  -8    8.27    3.88
  10  -4 -20    0.24    1.93
  11  -4 -19   16.22    3.83
  12  -4 -18   19.99    4.52
  13  -4 -17   -0.82    1.64
  14  -4 -16   11.14    3.28
  15  -4 -15   -0.52    1.74
  16  -4 -14  105.89    8.68
  16  -4 -14   90.53    7.78
  17  -4 -13    4.26    3.42
  18  -4 -12   23.68    5.35
  19  -4 -11    0.34    3.12
  20  -4 -10   -0.87    2.63
  12  -4 -19   -0.99    1.94
  13  -4 -18  100.45    8.72
  14  -4 -17    0.70    1.56
  15  -4 -16   -0.52    1.61
  16  -4 -15    5.16    2.25
  17  -4 -14   16.95    4.65
  17  -4 -14   10.16    3.00
  18  -4 -13    1.19    2.52
  19  -4 -12   50.96    7.16
  17   5 -12    5.12    2.57
  16   5 -13    0.33    1.98
  15   5 -14   97.53    8.94
  14   5 -15    0.03    1.70
  13   5 -16   96.08    8.87
  12   5 -17    5.15    2.57
  18   5 -10   20.93    5.22
  17   5 -11    0.65    2.32
  16   5 -12   11.60    4.10
  15   5 -13    1.13    2.14
  14   5 -14    6.32    2.86
  13   5 -15    2.20    2.09
  12   5 -16   20.04    4.48
  11   5 -17   -0.13    1.81
  10   5 -18   21.41    4.91
  19   5  -8   63.61    8.09
  18   5  -9   -2.19    1.82
  17   5 -10    6.53    2.86
  16   5 -11    0.17    1.79
  15   5 -12  353.47   20.47
  14   5 -13    0.38    2.04
  13   5 -14   18.56    4.72
  12   5 -15    0.82    2.26
  11   5 -16    1.78    2.27
  10   5 -17   -1.08    2.04
   9   5 -18   11.14    3.75
   8   5 -19    0.84    2.25
  19   5  -7    3.49    2.73
  18   5  -8  153.15   11.83
  17   5  -9   -1.11    2.17
  16   5 -10   13.68    4.26
  15   5 -11    1.83    2.44
  14   5 -12   67.57    8.08
  13   5 -13    1.04    2.23
  12   5 -14  228.83   15.06
  11   5 -15   -0.20    2.07
  10   5 -16  119.92    9.94
  -9  -5  17   -1.20    1.17
   9   5 -17    1.85    2.30
  -8  -5  18    2.63    1.70
   8   5 -18    0.31    1.94
   7   5 -19    0.15    2.25
  -7  -5  19    0.16    1.79
  19   5  -6   47.86    6.92
  18   5  -7    0.25    2.68
  17   5  -8   20.59    4.85
  16   5  -9    1.23    2.49
  15   5 -10  238.26   15.24
  14   5 -11    0.08    2.08
  13   5 -12   54.74    7.28
 -12  -5  13    0.36    0.86
  12   5 -13    2.95    2.62
 -12  -5  13   -0.38    1.04
 -11  -5  14   35.43    4.59
  11   5 -14   57.47    7.11
 -11  -5  14   26.07    4.19
 -10  -5  15    1.88    1.74
 -10  -5  15   -2.27    1.72
  10   5 -15    1.42    2.09
  -9  -5  16   50.07    5.81
   9   5 -16   40.19    6.44
   8   5 -17   -1.87    1.98
  -8  -5  17    1.03    1.59
   7   5 -18   26.00    5.37
  -7  -5  18   18.65    4.01
   6   5 -19   -0.21    2.22
  -6  -5  19   -1.57    1.36
   5   5 -20  100.12    9.25
  -5  -5  20  106.61    9.02
  18   5  -6   76.91    7.64
  17   5  -7    0.74    2.01
  16   5  -8  178.97   12.53
  15   5  -9    0.99    2.32
  14   5 -10  161.92   10.30
  14   5 -10  151.05   11.29
  13   5 -11   -1.13    1.49
  13   5 -11    4.15    2.73
 -12  -5  12   98.27    6.65
 -12  -5  12   70.44    6.19
 -11  -5  13   -1.36    1.29
  11   5 -13    0.37    1.77
 -11  -5  13    0.85    1.11
 -10  -5  14   65.87    5.94
 -10  -5  14   64.88    5.75
  10   5 -14   67.11    7.04
   9   5 -15   -0.75    2.01
  -9  -5  15    0.06    1.48
  -9  -5  15    2.04    2.04
   8   5 -16   46.93    6.72
  -8  -5  16   47.19    5.70
  -7  -5  17   -0.76    1.59
   7   5 -17   -0.32    2.07
   6   5 -18   18.18    4.85
  -6  -5  18   21.07    4.24
   5   5 -19    0.49    2.27
  -5  -5  19   -1.23    1.54
  -4  -5  20   10.31    3.43
   4   5 -20    9.88    3.58
  18   5  -5    2.17    2.74
  17   5  -6    6.80    2.91
  17   5  -6    7.44    3.35
  16   5  -7    1.50    2.24
  16   5  -7    0.14    1.83
  15   5  -8   15.63    3.52
  15   5  -8   20.30    4.63
  14   5  -9    1.81    2.27
  14   5  -9   -0.90    1.19
  13   5 -10   65.78    6.98
  13   5 -10   70.82    6.26
  12   5 -11   -0.17    1.96
  12   5 -11    0.92    1.83
 -11  -5  12   23.19    3.73
  11   5 -12   17.03    4.60
 -11  -5  12   21.26    3.49
 -10  -5  13    1.14    1.49
 -10  -5  13    3.11    1.78
  10   5 -13   -1.31    2.17
   9   5 -14    3.44    2.49
  -9  -5  14   -0.82    1.56
  -9  -5  14    0.94    1.25
  -8  -5  15   -0.87    1.04
   8   5 -15    0.03    1.84
  -7  -5  16    7.09    2.34
   7   5 -16    2.38    2.61
   6   5 -17    0.01    2.07
  -6  -5  17   -0.05    1.62
  -5  -5  18  132.64    9.82
   5   5 -18  133.04   10.57
  -4  -5  19   -0.81    1.66
   4   5 -19    1.83    2.63
  -3  -5  20   28.68    5.24
   3   5 -20   26.32    5.57
  19   5  -3   -0.58    1.80
  18   5  -4   54.08    6.45
  17   5  -5    1.35    2.18
  17   5  -5    1.87    2.79
  16   5  -6   20.98    4.40
  16   5  -6   19.68    4.55
  15   5  -7   -0.22    1.53
  15   5  -7   -0.52    2.06
  14   5  -8   61.33    7.08
  14   5  -8   53.69    5.38
  13   5  -9   -0.85    1.28
  13   5  -9   -0.68    2.00
  12   5 -10   17.94    3.70
  12   5 -10   15.84    4.50
  11   5 -11   -1.51    2.23
  11   5 -11   -0.04    1.93
  10   5 -12  381.56   20.78
 -10  -5  12  386.50   19.24
 -10  -5  12  382.00   18.22
  -9  -5  13   -0.52    1.45
   9   5 -13    0.42    2.03
  -9  -5  13    1.53    1.28
  -8  -5  14   73.99    6.42
   8   5 -14   75.44    7.43
  -8  -5  14   79.29    6.44
   7   5 -15   -2.72    1.44
  -7  -5  15   -1.06    1.04
  -6  -5  16   22.98    4.22
   6   5 -16   25.08    5.31
  -5  -5  17    0.55    1.46
   5   5 -17    1.31    2.40
   4   5 -18   55.43    7.41
  -4  -5  18   53.50    6.64
   3   5 -19    4.69    2.84
  -3  -5  19   -0.24    1.90
  -2  -5  20   29.92    5.49
  20   5  -1    4.71    2.61
  19   5  -2  220.36   13.69
  18   5  -3    0.70    2.28
  17   5  -4   17.08    3.96
  17   5  -4    1.58    1.77
  16   5  -5   -1.71    1.58
  16   5  -5    0.42    2.03
  15   5  -6   38.58    5.30
  15   5  -6   37.49    5.63
  14   5  -7    0.75    1.82
  14   5  -7   -0.64    1.64
  13   5  -8   23.74    4.22
  13   5  -8   13.25    3.70
  12   5  -9   -1.36    1.31
  12   5  -9   -1.16    1.99
  11   5 -10  597.72   29.64
  11   5 -10  606.18   28.05
  10   5 -11   -1.92    1.82
   9   5 -12   11.71    3.66
  -9  -5  12   14.74    3.31
  -9  -5  12   11.18    2.88
  -8  -5  13    1.16    1.51
  -8  -5  13    0.26    0.94
   8   5 -13    1.60    2.16
  -7  -5  14    9.52    2.77
   7   5 -14    9.23    3.25
  -7  -5  14    8.19    2.64
   6   5 -15   -0.37    2.23
  -6  -5  15   -0.66    1.07
  -5  -5  16    0.84    1.31
   5   5 -16    1.33    2.07
  -4  -5  17    2.21    2.02
   4   5 -17    0.12    2.52
   3   5 -18  317.32   18.96
  -3  -5  18  341.25   18.72
  -2  -5  19   -2.92    1.79
  -1  -5  20   24.97    5.07
  20   5   0   29.71    5.43
  19   5  -1   -0.50    2.04
  18   5  -2   10.91    3.73
  17   5  -3    1.04    2.06
  15   5  -5    1.82    1.90
  15   5  -5   -0.40    1.65
  14   5  -6   30.38    4.86
  14   5  -6   26.39    4.50
  13   5  -7    2.00    1.57
  13   5  -7    1.79    1.90
  12   5  -8  255.69   14.68
  12   5  -8  229.81   13.58
  11   5  -9   -1.38    1.50
  11   5  -9    0.28    1.69
  10   5 -10    4.22    2.68
  10   5 -10    9.12    3.11
  -9  -5  11   -0.49    1.20
  -9  -5  11   -0.17    0.99
   9   5 -11    2.54    2.33
   8   5 -12   57.14    6.88
  -8  -5  12   54.42    5.22
  -8  -5  12   54.06    5.13
  -7  -5  13    0.46    1.09
  -7  -5  13   -0.51    1.31
   7   5 -13    2.65    2.42
  -6  -5  14   68.50    6.17
   6   5 -14   66.68    6.83
  -5  -5  15    1.86    1.45
   5   5 -15   -0.01    2.33
   4   5 -16   34.30    5.69
  -4  -5  16   30.83    5.00
  -3  -5  17    0.85    1.71
   3   5 -17    2.21    2.91
  -2  -5  18    7.98    3.14
  -1  -5  19    1.43    1.92
   0  -5  20   18.62    4.48
  20   5   1   -2.94    1.97
  19   5   0   27.62    5.08
  18   5  -1    2.96    2.27
  17   5  -2  166.47   11.22
  16   5  -3   -1.72    2.07
  15   5  -4    4.16    2.29
  14   5  -5    1.29    1.65
  14   5  -5    0.20    2.02
  13   5  -6   67.15    6.13
  13   5  -6   65.00    6.28
  12   5  -7   -0.79    1.80
  12   5  -7    0.99    1.48
  11   5  -8  464.26   23.48
  11   5  -8  454.84   22.36
  10   5  -9    0.14    1.91
  10   5  -9    0.02    1.59
   9   5 -10  254.04   14.02
   9   5 -10  233.20   14.42
   8   5 -11   -0.18    1.47
  -8  -5  11    1.31    1.53
  -8  -5  11    1.32    1.21
   7   5 -12  190.16   12.52
  -7  -5  12  197.28   11.22
  -7  -5  12  192.69   11.71
   6   5 -13    0.48    2.28
  -6  -5  13    1.70    1.34
  -6  -5  13    0.75    1.61
   5   5 -14   75.03    7.23
  -5  -5  14   65.72    6.09
   4   5 -15    0.72    2.44
  -4  -5  15    3.09    1.74
   3   5 -16  139.72   10.94
  -3  -5  16  163.83   10.77
  -2  -5  17   -1.66    1.39
  -1  -5  18   82.50    7.83
   0  -5  19   -0.68    1.63
   1  -5  20  141.83   11.18
  20   5   2   30.37    5.60
  19   5   1   -0.58    1.93
  18   5   0   69.78    6.81
  16   5  -2   28.77    5.06
  15   5  -3   -3.68    1.22
  15   5  -3    1.05    2.07
  14   5  -4    2.02    2.03
  14   5  -4    1.19    1.04
  13   5  -5   -0.44    1.41
  13   5  -5   -0.23    1.31
  12   5  -6   38.88    5.09
  12   5  -6   39.90    5.28
  11   5  -7    1.38    1.51
  11   5  -7    1.41    1.85
  10   5  -8   91.73    7.67
  10   5  -8   99.55    7.45
   9   5  -9    2.39    1.85
   9   5  -9    0.86    1.69
   8   5 -10   40.94    5.26
   8   5 -10   44.15    5.76
   7   5 -11    2.09    1.94
  -7  -5  11    0.16    1.39
  -7  -5  11    1.16    1.20
  -6  -5  12  157.68    9.95
   6   5 -12  174.77   11.49
  -6  -5  12  172.86   10.76
   5   5 -13   -0.66    1.79
  -5  -5  13    0.35    1.16
  -5  -5  13    1.85    1.69
  -4  -5  14    7.52    2.46
   4   5 -14    8.92    3.33
  -3  -5  15    2.02    1.54
   3   5 -15    2.55    2.97
   2   5 -16    0.35    2.35
  -2  -5  16    1.36    1.97
  -1  -5  17   -1.37    1.57
   0  -5  18   82.72    7.80
   1  -5  19    0.36    1.77
   2  -5  20   60.50    7.62
  20   5   3   -0.33    1.92
  19   5   2   50.18    6.86
  18   5   1    2.38    2.24
  17   5   0  482.87   24.42
  16   5  -1    0.30    2.10
  15   5  -2    9.40    2.98
  14   5  -3   -0.92    1.57
  14   5  -3   -2.48    1.43
  13   5  -4   51.13    5.86
  12   5  -5   -2.01    1.18
  12   5  -5   -1.52    1.58
  11   5  -6   33.00    4.73
  11   5  -6   40.58    5.35
  10   5  -7    1.66    1.87
  10   5  -7    0.17    1.62
   9   5  -8  740.36   34.86
   9   5  -8  779.01   34.06
   8   5  -9    0.70    1.58
   8   5  -9   -2.54    1.48
   7   5 -10  170.28   11.07
  -7  -5  10  155.59   10.10
  -7  -5  10  168.45    9.71
   6   5 -11   -0.15    1.57
  -6  -5  11   -0.75    1.29
  -6  -5  11   -1.20    0.87
   5   5 -12    0.41    1.78
  -5  -5  12   -1.55    1.09
  -5  -5  12    0.31    1.19
   4   5 -13   -0.27    1.81
  -4  -5  13    1.22    1.63
  -4  -5  13   -0.12    1.02
   3   5 -14   48.15    6.41
  -3  -5  14   50.44    5.86
   2   5 -15   -1.53    1.85
  -2  -5  15   -0.11    1.59
  -1  -5  16  604.93   29.06
   0  -5  17   -0.41    1.73
   1  -5  18   13.13    3.76
   2  -5  19   -0.25    1.92
   3  -5  20    4.78    2.19
  19   5   3    2.27    1.85
  18   5   2   17.72    4.60
  17   5   1    1.04    2.31
  16   5   0    1.01    2.50
  15   5  -1    2.59    2.08
  14   5  -2  100.31    8.00
  13   5  -3    0.75    1.68
  13   5  -3    0.01    1.52
  12   5  -4    5.19    2.37
  12   5  -4    1.05    1.27
  11   5  -5    1.21    1.74
  11   5  -5   -0.15    1.43
  10   5  -6   58.21    5.62
  10   5  -6   51.35    5.85
   9   5  -7   -0.32    1.65
   9   5  -7    0.73    1.88
   8   5  -8  214.33   12.41
   8   5  -8  207.57   12.69
   7   5  -9   -2.74    1.68
   7   5  -9    1.46    1.97
  -6  -5  10  441.66   20.40
  -6  -5  10  458.90   21.75
   6   5 -10  439.70   22.56
   5   5 -11   -1.20    1.41
  -5  -5  11   -0.13    1.38
  -5  -5  11    0.79    1.10
  -4  -5  12   34.35    4.69
  -4  -5  12   39.50    5.01
   4   5 -12   40.65    5.64
  -3  -5  13   -1.46    1.01
   3   5 -13   -0.88    1.76
  -2  -5  14  228.76   13.13
   2   5 -14  202.59   13.46
  -1  -5  15   -1.24    1.50
   0  -5  16  195.90   12.75
   1  -5  17    1.36    2.29
   2  -5  18   19.44    4.65
   3  -5  19    0.39    1.73
  19   5   4   69.48    7.15
  18   5   3    0.22    1.75
  17   5   2    9.00    3.15
  16   5   1    0.74    1.84
  15   5   0   44.84    6.13
  14   5  -1    1.55    1.87
  13   5  -2   33.89    5.04
  13   5  -2   37.18    4.68
  12   5  -3   -0.84    1.40
  12   5  -3    1.90    1.86
  10   5  -5   -0.88    1.54
  10   5  -5    1.79    1.71
   9   5  -6   50.97    5.14
   9   5  -6   46.76    4.90
   8   5  -7    1.49    2.04
   8   5  -7    0.90    1.89
   7   5  -8  537.25   26.07
   7   5  -8  542.11   25.38
   6   5  -9   -1.82    1.59
   6   5  -9    1.65    1.97
   5   5 -10   30.75    4.91
  -5  -5  10   39.55    4.83
  -5  -5  10   31.06    4.39
  -4  -5  11    1.94    1.51
   4   5 -11    1.15    2.04
  -4  -5  11    1.77    1.27
  -3  -5  12   75.31    6.42
  -3  -5  12   76.12    6.12
   3   5 -12   74.75    6.85
   2   5 -13   -0.50    1.72
  -2  -5  13   -0.42    1.14
  -1  -5  14   17.33    3.84
   0  -5  15    3.67    2.27
   1  -5  16  248.03   15.11
   2  -5  17   -0.08    1.54
   3  -5  18   31.01    5.57
   4  -5  19   -0.47    1.73
  19   5   5   -1.24    1.65
  18   5   4    5.78    2.61
  17   5   3    0.89    1.49
  16   5   2    2.31    2.08
  15   5   1    2.38    2.45
  14   5   0  330.93   17.79
  13   5  -1   -0.33    1.68
  12   5  -2   41.70    5.45
  12   5  -2   39.80    4.19
  11   5  -3   -0.03    1.35
  11   5  -3   -0.97    1.32
  10   5  -4   40.97    4.42
  10   5  -4   64.58    5.77
   9   5  -5    2.20    1.66
   9   5  -5    0.40    1.75
   8   5  -6  110.10    7.85
   8   5  -6   98.25    7.61
   7   5  -7   -0.25    1.74
   7   5  -7   -0.89    1.43
   6   5  -8   -0.82    1.47
   6   5  -8    1.07    1.71
  -5  -5   9    1.76    1.46
   5   5  -9    2.15    2.25
  -5  -5   9    1.14    1.36
   4   5 -10  198.96   12.19
  -4  -5  10  195.04   11.64
  -4  -5  10  199.35   11.13
   3   5 -11    9.48    2.75
  -3  -5  11   -0.71    1.35
  -3  -5  11   -0.85    1.04
   2   5 -12   10.64    3.07
  -2  -5  12    8.96    2.53
  -1  -5  13   -0.50    1.09
   0  -5  14   50.65    6.07
   1  -5  15   -0.57    1.53
   2  -5  16   12.41    3.82
   3  -5  17    1.30    2.22
   4  -5  18   14.68    3.94
   5  -5  19    2.83    2.31
  19   5   6   10.41    3.32
  18   5   5    2.94    1.85
  17   5   4   77.87    7.43
  16   5   3    1.32    2.17
  15   5   2   70.93    6.88
  14   5   1    0.55    1.64
  13   5   0   21.21    4.31
  12   5  -1   18.73    3.16
  12   5  -1   22.11    4.11
  11   5  -2  151.31    9.48
  11   5  -2  166.46   10.48
  10   5  -3   -0.01    0.88
  10   5  -3   -0.79    1.51
   9   5  -4  320.60   16.65
   9   5  -4  339.96   17.26
   8   5  -5   -1.12    1.56
   8   5  -5    0.52    1.27
   7   5  -6  637.59   29.11
   7   5  -6  642.97   29.64
   6   5  -7    2.34    1.82
   6   5  -7    0.60    1.51
   5   5  -8  140.34    9.41
   5   5  -8  138.39    9.43
  -4  -5   9    0.23    1.49
   4   5  -9   -0.51    1.65
  -4  -5   9   -0.25    1.08
  -3  -5  10   38.34    4.97
  -3  -5  10   41.43    4.94
   3   5 -10   37.02    5.26
  -2  -5  11   -0.13    0.97
   2   5 -11    0.76    1.47
  -2  -5  11   -0.31    1.27
  -1  -5  12   63.21    5.81
   0  -5  13    0.87    1.31
   1  -5  14  242.27   14.26
   2  -5  15   -0.76    1.47
   3  -5  16   46.66    6.23
   4  -5  17    0.73    1.79
   5  -5  18   28.30    5.44
   6  -5  19    2.63    2.04
  18   5   6   10.88    3.41
  17   5   5   -1.15    1.46
  16   5   4    5.79    2.57
  15   5   3    2.35    2.46
  14   5   2  393.88   20.38
  13   5   1    1.72    2.06
  12   5   0  993.00   43.26
  11   5  -1    0.07    1.40
  11   5  -1    0.10    1.77
  10   5  -2   69.58    6.36
  10   5  -2   64.96    5.34
   9   5  -3    0.39    1.04
   9   5  -3   -0.81    1.62
   8   5  -4   78.47    6.51
   8   5  -4   73.74    5.88
   7   5  -5    1.24    1.59
   7   5  -5    2.96    1.38
   6   5  -6  580.26   25.84
   6   5  -6  503.98   25.01
   5   5  -7    3.28    2.22
   5   5  -7   -1.77    1.71
   4   5  -8  292.43   15.85
   4   5  -8  298.92   15.77
   3   5  -9    0.58    2.02
  -3  -5   9    1.38    1.63
  -3  -5   9   -0.85    1.12
  -2  -5  10   25.44    4.11
  -2  -5  10   25.07    4.04
   2   5 -10   32.35    4.80
  -1  -5  11    0.46    1.24
  -1  -5  11   -0.75    1.19
   0  -5  12  509.19   24.47
   1  -5  13    0.14    1.28
   2  -5  14  151.56   10.47
   3  -5  15   -2.06    1.45
   4  -5  16   98.02    8.44
   5  -5  17    0.92    2.12
   6  -5  18   21.95    4.87
  18   5   7   -0.61    1.51
  17   5   6   34.94    5.61
  16   5   5   -0.08    1.46
  15   5   4   78.97    7.26
  14   5   3    0.90    2.49
  13   5   2  860.96   38.50
  12   5   1   -0.56    2.10
  11   5   0    1.27    2.00
  10   5  -1   20.90    3.98
  10   5  -1   15.83    2.69
   9   5  -2   26.69    4.37
   9   5  -2   28.73    3.65
   8   5  -3    0.27    1.01
   8   5  -3   -0.68    1.51
   7   5  -4   99.20    6.92
   7   5  -4   91.78    7.12
   6   5  -5    0.46    1.29
   6   5  -5   -0.68    1.21
   5   5  -6 1229.85   52.40
   5   5  -6 1267.58   53.79
   4   5  -7    4.73    2.01
   4   5  -7    6.45    2.15
  -3  -5   8    5.61    2.12
  -3  -5   8    8.29    2.32
   3   5  -8    9.07    3.00
  -2  -5   9    1.30    1.56
   2   5  -9   -0.95    1.36
  -2  -5   9    0.46    1.22
  -1  -5  10   -0.72    1.14
  -1  -5  10    1.05    1.68
   0  -5  11   -2.02    0.80
   1  -5  12   49.35    5.18
   2  -5  13    0.27    1.31
   3  -5  14  589.60   28.38
   4  -5  15   -0.41    1.84
   5  -5  16   12.26    3.81
   6  -5  17    0.37    1.97
   7  -5  18    6.65    2.92
  18   5   8   67.54    6.96
  17   5   7   -0.81    1.58
  16   5   6   44.54    6.11
  15   5   5   -0.54    1.89
  14   5   4   44.84    6.03
  13   5   3   -1.82    1.44
  12   5   2   80.86    6.96
  11   5   1    2.62    1.87
  10   5   0  635.34   27.70
  10   5   0  559.15   26.39
   9   5  -1   13.37    2.35
   9   5  -1   13.62    3.31
   8   5  -2  162.18    9.56
   8   5  -2  177.99   10.53
   7   5  -3    1.56    0.80
   7   5  -3    1.23    1.67
   6   5  -4  187.70   11.42
   6   5  -4  217.42   11.59
   5   5  -5    0.28    1.59
   5   5  -5   -0.57    1.22
   4   5  -6  134.67    8.65
   4   5  -6  128.50    8.72
   3   5  -7   -1.75    1.44
  -2  -5   8   66.37    5.67
  -2  -5   8   67.39    5.47
   2   5  -8   61.09    5.68
  -1  -5   9    0.15    1.19
  -1  -5   9   -1.08    1.16
   0  -5  10   90.00    6.59
   0  -5  10   81.95    6.70
   1  -5  11    0.08    1.39
   2  -5  12  102.61    7.88
   3  -5  13   -0.87    1.60
   4  -5  14   12.56    3.72
   5  -5  15   -1.11    1.70
   6  -5  16    1.96    2.41
   7  -5  17   -0.01    1.91
   8  -5  18    0.79    1.88
  17   5   8    1.02    1.52
  16   5   7    2.25    1.99
  15   5   6  272.19   15.66
  14   5   5   -1.98    1.64
  13   5   4  132.25    9.57
  12   5   3    1.42    1.76
  11   5   2  193.00   11.96
  10   5   1    1.04    1.90
   9   5   0  600.30   26.64
   9   5   0  589.70   27.30
   8   5  -1   12.25    3.00
   8   5  -1    5.01    1.58
   7   5  -2  643.20   29.07
   7   5  -2  659.05   29.34
   6   5  -3    0.39    1.32
   6   5  -3    0.39    0.52
   5   5  -4  157.93    9.90
   5   5  -4  170.66    9.87
   4   5  -5   -0.48    1.54
   4   5  -5   -1.97    0.96
   3   5  -6  530.31   24.52
   3   5  -6  503.73   24.04
   2   5  -7    0.45    1.45
  -1  -5   8   22.21    3.70
  -1  -5   8   19.78    3.51
   0  -5   9   -0.92    1.03
   0  -5   9   -0.65    1.38
   1  -5  10  138.47    9.16
   2  -5  11   -0.28    1.39
   3  -5  12  196.52   12.01
   4  -5  13   -1.42    1.47
   5  -5  14  109.78    8.85
   6  -5  15    4.27    2.58
   7  -5  16   30.78    5.49
   8  -5  17   -1.29    1.98
   9  -5  18   34.59    6.41
  17   5   9   -1.27    1.35
  16   5   8    0.82    1.68
  15   5   7    0.04    1.49
  14   5   6    1.01    1.95
  13   5   5    1.42    2.23
  12   5   4  143.17    9.89
  11   5   3   -1.19    1.68
  10   5   2  103.51    7.96
   9   5   1   -1.32    1.56
   8   5   0  461.55   21.31
   8   5   0  470.07   22.15
   7   5  -1    1.23    1.51
   7   5  -1    1.56    1.08
   6   5  -2   54.43    5.01
   6   5  -2   51.28    4.46
   5   5  -3    0.54    0.53
   5   5  -3    0.05    1.47
   4   5  -4  415.52   20.13
   4   5  -4  425.73   20.16
   3   5  -5   -2.32    1.22
   3   5  -5   -2.09    1.06
   2   5  -6  292.00   15.32
  -1  -5   7   -1.18    0.80
  -1  -5   7   -0.87    1.05
   0  -5   8   30.93    4.40
   0  -5   8   36.88    4.54
   1  -5   9   -0.23    1.16
   1  -5   9   -0.45    1.45
   2  -5  10  120.68    8.48
   3  -5  11   -0.03    1.30
   4  -5  12  281.17   15.60
   5  -5  13   -0.21    2.17
   6  -5  14   69.63    6.83
   7  -5  15    0.12    1.70
   8  -5  16   27.98    5.41
   9  -5  17    1.64    2.14
  17   5  10   93.33    8.32
  16   5   9    0.65    1.76
  15   5   8  117.80    9.22
  14   5   7    2.85    2.31
  13   5   6  165.78   10.99
  12   5   5   -2.92    1.40
  11   5   4  702.86   32.18
  10   5   3   -0.76    1.61
   9   5   2   46.11    5.47
   8   5   1    0.74    1.61
   7   5   0  150.19    9.22
   7   5   0  139.47    8.20
   6   5  -1    2.00    1.32
   6   5  -1   -0.14    1.17
   5   5  -2 1381.44   56.91
   5   5  -2 1359.10   57.44
   4   5  -3   57.80    4.69
   3   5  -4 1673.89   70.28
   3   5  -4 1697.17   68.94
   2   5  -5    0.13    1.52
   1   5  -6   36.85    4.58
   0  -5   7   -1.30    1.00
   0  -5   7    0.85    1.26
   1  -5   8    7.63    2.50
   1  -5   8    5.66    2.46
   2  -5   9    1.20    1.43
   3  -5  10   34.79    4.65
   4  -5  11   -0.44    1.51
   5  -5  12  492.19   24.23
   6  -5  13   -1.94    1.80
   7  -5  14    6.77    3.23
   8  -5  15    1.71    2.27
   9  -5  16    1.95    2.43
  10  -5  17    1.23    2.24
  16   5  10  221.83   14.18
  15   5   9    3.75    2.34
  14   5   8    8.77    2.99
  13   5   7   -0.70    1.76
  12   5   6   75.78    6.68
  11   5   5    0.13    1.68
  10   5   4  322.58   17.05
   9   5   3    1.85    1.66
   8   5   2  238.72   13.31
   7   5   1    1.48    1.50
   7   5   1    0.98    0.98
   6   5   0  140.31    8.99
   6   5   0  148.10    8.25
   5   5  -1   -1.37    0.88
   5   5  -1    1.99    1.47
   4   5  -2    8.44    2.41
   4   5  -2    7.74    2.20
   3   5  -3    1.88    1.18
   2   5  -4   93.12    6.74
   1   5  -5   -0.54    0.99
   0  -5   6   16.93    3.03
   0  -5   6   20.19    3.39
   1  -5   7   -0.42    1.44
   1  -5   7    2.46    1.64
   2  -5   8   33.60    4.32
   2  -5   8   35.28    4.51
   3  -5   9   -0.23    1.44
   4  -5  10  132.33    9.08
   5  -5  11    1.54    1.91
   6  -5  12   24.53    4.49
   7  -5  13    0.86    2.21
   8  -5  14   20.81    4.63
   9  -5  15   -1.14    1.82
  10  -5  16    9.44    3.47
  16   5  11   -1.30    1.22
  15   5  10    0.90    1.69
  14   5   9   -0.22    1.81
  13   5   8  506.82   25.11
  12   5   7    2.26    1.81
  11   5   6    8.74    2.77
  10   5   5    0.12    1.54
   9   5   4  230.95   13.18
   8   5   3   -1.69    1.23
   7   5   2   45.73    5.16
   6   5   1   -0.37    1.07
   6   5   1   -1.29    0.87
   5   5   0  281.58   13.86
   5   5   0  283.77   14.60
   4   5  -1   -0.38    0.96
   4   5  -1   -0.49    0.80
   3   5  -2   98.40    6.82
   2   5  -3   -0.61    0.74
   1   5  -4  862.91   37.12
   0   5  -5   -1.12    0.89
   1  -5   6   54.71    4.77
   1  -5   6   50.35    4.83
   2  -5   7   -1.36    0.91
   2  -5   7    0.52    1.35
   3  -5   8  385.70   19.04
   4  -5   9    0.71    1.79
   5  -5  10   36.76    4.98
   6  -5  11   -0.61    1.59
   7  -5  12  172.07   11.49
   8  -5  13   -0.48    1.55
   9  -5  14   13.85    3.74
  10  -5  15    1.21    2.27
  11  -5  16   14.74    4.42
  15   5  11   -1.62    1.49
  14   5  10   16.43    4.05
  13   5   9   -0.99    1.39
  12   5   8   74.46    6.92
  11   5   7    1.28    1.79
  10   5   6    6.68    2.74
   9   5   5   -0.11    1.24
   8   5   4  147.27    9.44
   7   5   3   -0.22    1.38
   6   5   2    4.47    1.76
   5   5   1    1.45    1.02
   4   5   0    7.34    2.02
   3   5  -1    0.13    1.05
   2   5  -2    3.86    1.68
   1   5  -3    0.28    0.99
   0   5  -4  712.61   31.33
   1  -5   5    1.01    1.26
   1  -5   5    1.31    1.39
   2  -5   6    1.86    1.47
   2  -5   6    2.21    1.66
   3  -5   7    0.24    1.48
   3  -5   7    0.58    1.24
   4  -5   8  175.56   10.67
   5  -5   9   -1.33    1.06
   6  -5  10   43.86    5.44
   7  -5  11    0.49    1.89
   8  -5  12   56.79    6.63
   9  -5  13    1.54    2.41
  10  -5  14   13.20    3.86
  11  -5  15    1.56    2.82
  12  -5  16  157.10   12.08
  15   5  12    1.61    1.67
  14   5  11    1.24    2.07
  13   5  10   68.86    6.71
  12   5   9    0.98    1.67
  11   5   8  390.52   20.15
  10   5   7   -0.86    1.21
   9   5   6  296.08   15.81
   8   5   5    0.84    1.42
   7   5   4   22.39    3.82
   6   5   3   -0.78    1.09
   5   5   2   10.14    2.35
   4   5   1    2.39    1.19
   3   5   0  144.06    8.79
   2   5  -1   -1.38    0.86
   1   5  -2  279.83   14.25
   0   5  -3   -1.29    0.82
  -1   5  -4   75.34    5.81
   2  -5   5    0.23    0.95
   2  -5   5   -0.61    0.85
   3  -5   6    9.07    2.45
   3  -5   6    8.44    2.40
   4  -5   7   -0.02    1.37
   5  -5   8  385.46   19.05
   6  -5   9   -1.12    1.38
   8  -5  11   -1.08    1.69
   9  -5  12   18.12    4.21
  10  -5  13    1.66    1.91
  11  -5  14    6.97    3.32
  12  -5  15    2.31    2.53
  15   5  13   -2.28    1.49
  14   5  12   42.40    6.21
  13   5  11    2.62    1.93
  12   5  10   31.57    5.10
  11   5   9    1.54    1.90
  10   5   8    3.69    1.96
   9   5   7   -0.86    1.37
   8   5   6  161.61   10.20
   7   5   5    1.41    1.55
   6   5   4  276.72   14.53
   5   5   3    0.49    1.01
   4   5   2   61.38    5.01
   3   5   1    0.76    1.00
   3   5   1    0.82    1.00
   2   5   0  807.52   34.78
   1   5  -1   -2.59    0.94
   0   5  -2  300.18   15.09
  -1   5  -3    0.95    1.12
   2  -5   4  278.48   13.13
   2  -5   4  253.97   13.67
   3  -5   5   -1.91    0.93
   3  -5   5    0.01    1.03
   4  -5   6   51.04    4.85
   4  -5   6   59.38    4.95
   5  -5   7    1.38    1.67
   6  -5   8  514.27   24.26
   7  -5   9    1.53    1.80
   8  -5  10   67.60    6.48
   9  -5  11   -2.14    1.64
  10  -5  12   15.33    3.85
  11  -5  13    0.45    1.68
  12  -5  14   35.04    6.00
  13  -5  15    2.68    2.90
  14   5  13    0.08    1.33
  13   5  12   21.37    4.61
  12   5  11   -0.57    1.30
  11   5  10   24.04    4.52
  10   5   9    0.24    1.54
 -10  -5  -9    0.80    1.76
  -9  -5  -8  201.82   11.27
   9   5   8  205.44   12.29
  -8  -5  -7    1.22    1.37
   8   5   7    1.26    1.26
   7   5   6  409.98   19.64
  -7  -5  -6  383.71   18.39
   6   5   5   -0.65    1.15
  -6  -5  -5    0.72    1.26
  -5  -5  -4    8.15    2.00
   5   5   4    7.69    2.35
   4   5   3    0.56    0.71
  -4  -5  -3    0.10    1.02
   3   5   2  395.85   18.65
  -3  -5  -2  390.04   17.68
   2   5   1   -0.52    0.92
   1   5   0  304.25   15.60
  -1  -5   0  333.08   14.55
   0   5  -1   -0.56    1.08
  -1   5  -2  498.76   22.75
  -2   5  -3    1.04    1.27
   3  -5   4   31.01    3.82
   3  -5   4   27.31    3.75
   4  -5   5    0.77    1.04
   4  -5   5   -0.24    1.10
   5  -5   6   55.46    5.10
   6  -5   7    0.30    1.76
   7  -5   8    0.69    1.62
   8  -5   9    0.23    1.82
   9  -5  10  700.96   32.32
  10  -5  11   -0.37    1.53
  11  -5  12   58.19    7.06
  12  -5  13   -0.21    2.27
  13  -5  14    9.88    3.91
  14   5  14   42.90    6.35
  13   5  13    1.89    1.86
  12   5  12    3.74    2.24
  11   5  11    0.27    1.58
  10   5  10  147.77   10.26
 -10  -5 -10  156.08    9.76
  -9  -5  -9    2.26    1.79
   9   5   9    0.69    1.40
   8   5   8   44.89    5.47
  -8  -5  -8   40.40    4.07
   7   5   7   -1.14    1.14
  -7  -5  -7    1.94    1.47
  -6  -5  -6    4.70    1.71
   6   5   6    7.31    2.56
   5   5   5    1.97    1.27
  -5  -5  -5    0.43    1.32
  -4  -5  -4    6.89    1.85
   4   5   4    6.27    1.86
  -3  -5  -3   -0.05    1.09
   3   5   3   -0.43    0.87
   2   5   2   39.22    3.90
  -2  -5  -2   35.64    3.18
   1   5   1   -0.38    0.99
  -1  -5  -1   -1.48    0.91
   0  -5   0   -0.64    0.89
   0   5   0   -0.92    0.83
  -1   5  -1    0.47    1.29
  -2   5  -2   38.10    3.93
   3  -5   3    0.73    1.18
   3  -5   3   -1.36    1.06
   4  -5   4    8.47    2.22
   4  -5   4   10.03    2.44
   5  -5   5   -0.41    0.90
   5  -5   5    0.75    1.27
   6  -5   6    6.15    2.35
   7  -5   7   -0.50    1.68
   8  -5   8   39.25    5.00
   9  -5   9    2.85    2.16
  10  -5  10  160.86   10.86
  11  -5  11    2.25    2.47
  12  -5  12    1.67    2.28
  13  -5  13    2.86    2.38
  14  -5  14   37.70    6.35
  13   5  14    9.00    3.19
  12   5  13    0.74    1.74
 -11  -5 -12   55.43    5.45
  11   5  12   53.05    6.59
  10   5  11    2.38    2.05
 -10  -5 -11    1.17    1.94
   9   5  10  716.51   33.22
  -9  -5 -10  740.45   33.16
   8   5   9    0.71    1.38
  -8  -5  -9   -0.30    1.44
  -7  -5  -8    3.27    1.87
   7   5   8    2.24    1.52
   6   5   7   -0.44    1.38
  -6  -5  -7    0.17    1.10
   5   5   6   54.04    4.95
  -5  -5  -6   54.09    4.45
  -4  -5  -5   -0.77    1.16
   4   5   5    0.92    1.01
   3   5   4   27.27    3.66
  -3  -5  -4   28.26    3.18
   2   5   3   -1.21    0.75
  -2  -5  -3   -0.28    1.05
   1   5   2  501.68   22.25
  -1  -5  -2  479.35   21.58
   0  -5  -1   -1.19    0.82
   0   5   1   -1.16    0.62
  -1   5   0  341.51   16.38
  -2   5  -1   -2.01    0.56
  -3   5  -2  392.72   18.56
   4  -5   3   -0.06    1.13
   4  -5   3    0.06    1.04
   5  -5   4    5.45    1.86
   5  -5   4    9.23    2.34
   6  -5   5    1.38    1.39
   7  -5   6  370.96   18.29
   8  -5   7   -0.73    1.67
   9  -5   8  144.45    9.73
  10  -5   9   -0.61    1.74
  11  -5  10   28.49    4.92
  12  -5  11   -1.42    1.76
  13  -5  12   21.59    4.92
  14  -5  13    1.02    2.17
  13   5  15    4.45    1.99
  12   5  14   39.07    6.14
  11   5  13    0.07    1.70
 -11  -5 -13   -2.70    1.53
 -10  -5 -12   25.82    4.16
  10   5  12   22.11    4.56
   9   5  11    0.27    1.60
  -9  -5 -11   -0.43    1.39
  -8  -5 -10   55.94    5.42
   8   5  10   57.37    5.60
  -7  -5  -9    0.11    1.62
   7   5   9   -1.01    1.29
  -6  -5  -8  507.27   23.21
   6   5   8  487.08   23.32
   5   5   7   -0.31    1.14
  -5  -5  -7    0.73    1.13
   4   5   6   46.26    4.45
  -4  -5  -6   54.97    4.46
   3   5   5    0.86    0.93
  -3  -5  -5    0.43    0.95
   2   5   4  235.33   12.38
  -2  -5  -4  244.84   12.03
   1   5   3    2.86    1.18
  -1  -5  -3    3.67    1.49
   0  -5  -2  272.00   13.52
   0   5   2  306.14   14.39
   1  -5  -1    5.31    1.59
  -1   5   1    9.84    2.13
  -2   5   0  813.28   34.69
  -3   5  -1    0.79    0.95
   4  -5   2   77.67    5.69
   4  -5   2   65.61    5.07
   5  -5   3    0.15    1.31
   5  -5   3   -1.23    0.94
   6  -5   4  295.27   13.97
   6  -5   4  286.28   14.68
   7  -5   5    0.42    1.32
   8  -5   6  154.11    9.64
   9  -5   7    0.34    1.53
  10  -5   8    0.99    2.00
  11  -5   9    1.56    1.64
  12  -5  10   22.21    4.72
  13  -5  11    1.09    2.22
  14  -5  12   55.77    7.28
  15  -5  13    2.96    2.63
  12   5  15    1.88    1.63
  11   5  14    8.02    2.97
 -11  -5 -14    6.71    2.81
  10   5  13   -3.42    1.14
 -10  -5 -13    1.50    2.28
   9   5  12   27.32    4.89
  -9  -5 -12   28.32    4.41
  -8  -5 -11    0.94    1.65
   8   5  11    1.61    1.72
   7   5  10  936.77   40.48
  -7  -5 -10  911.42   40.61
  -6  -5  -9   -0.22    1.31
   6   5   9   -0.99    1.16
   5   5   8  399.72   19.67
  -5  -5  -8  414.13   19.67
   4   5   7    0.70    1.12
  -4  -5  -7   -1.37    0.83
  -3  -5  -6    6.29    1.86
   3   5   6    3.05    1.43
  -2  -5  -5    0.69    1.10
   2   5   5    1.27    1.13
   1   5   4   65.21    5.10
  -1  -5  -4   70.94    5.09
   0  -5  -3    4.37    1.58
   0   5   3    0.85    0.96
  -1   5   2  306.94   14.70
   1  -5  -2  289.94   14.08
  -3   5   0  145.03    8.45
  -4   5  -1   -0.51    0.72
   5  -5   2   10.13    2.49
   5  -5   2   10.03    2.53
   6  -5   3    0.85    1.45
   6  -5   3    1.03    1.29
   7  -5   4   24.09    3.50
   8  -5   5   -0.05    1.31
   9  -5   6  277.80   14.85
  10  -5   7   -0.31    1.78
  11  -5   8  394.11   20.13
  12  -5   9   -0.17    1.98
  13  -5  10   67.19    6.72
  14  -5  11   -1.01    1.45
  15  -5  12    4.18    2.98
  11   5  15    1.80    1.64
 -11  -5 -15   -0.86    1.73
  10   5  14   11.97    3.38
 -10  -5 -14   13.73    3.49
   9   5  13   -1.11    1.54
  -9  -5 -13   -2.36    1.51
  -8  -5 -12   55.02    5.47
   8   5  12   60.66    5.98
  -7  -5 -11    2.51    2.27
   7   5  11    2.63    1.75
   6   5  10   42.47    5.24
  -6  -5 -10   46.35    5.11
  -5  -5  -9    1.58    1.31
   5   5   9    1.41    1.55
   4   5   8  165.19    9.98
  -4  -5  -8  168.51    9.80
   3   5   7   -0.38    0.80
  -3  -5  -7    0.79    0.97
   2   5   6    1.64    1.37
  -2  -5  -6    2.52    1.40
  -1  -5  -5   -1.60    1.10
   1   5   5    1.10    1.09
   0   5   4  591.08   27.22
   0  -5  -4  659.21   27.66
  -1   5   3    1.01    0.88
   1  -5  -3    5.38    1.67
  -2   5   2    1.56    1.08
  -3   5   1    2.78    1.20
  -4   5   0    2.41    1.25
   5  -5   1    2.57    1.38
   5  -5   1   -0.66    0.86
   6  -5   2    9.05    2.13
   6  -5   2    6.28    1.98
   7  -5   3   -0.63    0.99
   8  -5   4  129.04    8.16
   9  -5   5    0.72    1.42
  10  -5   6    5.27    2.57
  11  -5   7   -1.20    1.86
  12  -5   8   74.32    6.81
  13  -5   9    1.58    2.46
  14  -5  10   25.04    5.03
  15  -5  11   -1.26    2.07
  16  -5  12    6.02    2.87
  11   5  16   12.77    3.70
 -11  -5 -16   17.44    4.08
 -10  -5 -15    0.65    1.75
  10   5  15   -0.34    1.39
  -9  -5 -14   11.86    3.61
   9   5  14   12.65    3.56
  -8  -5 -13    1.61    2.08
   8   5  13    1.39    1.75
  -7  -5 -12  180.15   10.99
   7   5  12  173.02   11.24
   6   5  11   -0.08    1.40
  -6  -5 -11   -1.23    1.73
   5   5  10   39.60    4.97
  -5  -5 -10   28.60    4.30
  -4  -5  -9    2.29    1.28
   4   5   9    0.03    1.08
  -3  -5  -8  400.81   19.32
   3   5   8  408.16   19.36
  -2  -5  -7    0.71    1.12
   2   5   7    0.08    0.76
  -1  -5  -6   50.66    4.17
   1   5   6   44.72    4.19
   0   5   5   -0.61    0.67
   0  -5  -5   -0.70    1.31
  -1   5   4  806.32   33.61
   1  -5  -4  776.44   34.12
  -2   5   3   -0.71    0.74
   2  -5  -3   -0.29    1.12
  -3   5   2   77.71    5.41
  -4   5   1   -0.29    0.42
   6  -5   1   -1.89    0.74
   6  -5   1   -0.36    1.01
   7  -5   2   39.88    3.97
   7  -5   2   45.39    4.03
   8  -5   3    1.46    1.19
   9  -5   4  227.71   12.35
  10  -5   5   -1.48    1.69
  11  -5   6   15.24    3.70
  12  -5   7    1.19    2.07
  13  -5   8  543.44   26.38
  14  -5   9    4.21    2.60
  15  -5  10    5.46    3.03
  16  -5  11    3.90    2.34
  16  -5  11   -0.55    2.32
  10   5  16   10.35    3.31
 -10  -5 -16   12.17    3.63
   9   5  15    1.22    1.82
  -9  -5 -15    1.49    2.17
   8   5  14   16.14    4.15
  -8  -5 -14   16.68    3.92
  -7  -5 -13    0.37    2.05
   7   5  13   -0.74    1.64
  -6  -5 -12   35.32    4.76
   6   5  12   34.09    5.09
  -5  -5 -11    4.94    2.47
   5   5  11    1.92    1.61
  -4  -5 -10  133.42    8.70
   4   5  10  128.86    8.65
   3   5   9    0.22    1.18
  -3  -5  -9   -0.40    1.13
   2   5   8   34.04    3.53
  -2  -5  -8   31.84    3.94
  -1  -5  -7    1.41    1.29
   1   5   7   -0.46    0.83
   0  -5  -6   12.80    2.54
   0   5   6   14.82    2.68
   1  -5  -5   -1.30    1.16
  -1   5   5   -0.46    0.61
  -3   5   3   -0.19    0.38
  -4   5   2    4.60    1.53
  -5   5   1   -0.68    0.76
   6  -5   0  138.77    7.78
   6  -5   0  141.24    8.23
   7  -5   1    0.39    1.14
   7  -5   1    0.77    0.94
   8  -5   2  221.02   11.77
   9  -5   3    0.71    1.14
  10  -5   4  328.77   16.56
  11  -5   5   -4.02    1.21
  12  -5   6   77.37    6.72
  13  -5   7    0.90    1.98
  14  -5   8    7.67    3.01
  15  -5   9    1.36    2.83
  16  -5  10  285.98   17.59
  16  -5  10  285.63   16.88
  10   5  17    2.16    2.13
 -10  -5 -17    1.34    2.03
  -9  -5 -16    4.26    2.74
   9   5  16    3.97    2.15
   8   5  15   -0.65    1.39
  -8  -5 -15    2.14    2.24
  -7  -5 -14    6.96    3.02
   7   5  14    7.05    2.85
  -6  -5 -13   13.54    3.14
  -5  -5 -12  499.18   24.05
   5   5  12  486.33   23.62
   4   5  11    2.03    1.62
  -4  -5 -11   -0.41    1.76
  -3  -5 -10   38.70    4.73
   3   5  10   38.87    4.67
  -2  -5  -9    0.67    1.10
   2   5   9    0.17    0.99
  -1  -5  -8    8.35    2.25
   1   5   8    8.02    2.16
   0   5   7   -0.63    0.63
   0  -5  -7   -0.20    1.15
   1  -5  -6   32.00    3.69
   2  -5  -5   -1.20    1.02
  -2   5   5   -0.41    0.41
  -3   5   4 1634.29   63.44
   3  -5  -4 1503.36   64.95
  -4   5   3   -1.14    0.76
  -5   5   2 1270.11   51.87
   6  -5  -1    0.82    1.31
   6  -5  -1    0.27    1.12
   7  -5   0  162.32    8.58
   7  -5   0  152.69    8.93
   8  -5   1   -0.02    0.87
   9  -5   2   47.33    4.47
  10  -5   3    1.73    1.25
  11  -5   4  683.47   30.62
  12  -5   5    1.84    1.97
  13  -5   6  190.82   11.79
  14  -5   7    1.20    1.90
  15  -5   8  119.30   10.07
  15  -5   8  131.81    9.82
  16  -5   9    1.05    2.82
  16  -5   9   -1.17    2.02
  17  -5  10  119.17   10.07
  -9  -5 -17   -2.83    1.67
   9   5  17   -0.08    1.76
  -8  -5 -16   22.35    4.50
   8   5  16   21.18    4.56
   7   5  15    1.07    2.15
  -7  -5 -15    1.16    1.98
  -6  -5 -14   70.10    6.53
   6   5  14   73.80    6.79
   5   5  13    1.32    1.40
  -5  -5 -13    6.77    2.72
   4   5  12  276.06   14.90
  -4  -5 -12  278.28   15.33
   3   5  11   -2.18    1.09
  -3  -5 -11    1.50    1.93
   2   5  10  118.98    7.71
  -2  -5 -10  108.99    7.77
  -1  -5  -9   -0.83    1.07
   1   5   9   -0.43    0.81
   0  -5  -8   33.44    3.63
   1  -5  -7   -0.13    1.22
  -1   5   7   -0.19    0.49
   2  -5  -6  267.91   13.52
  -2   5   6  259.14   13.06
  -3   5   5    0.42    0.86
   3  -5  -5    2.42    1.68
   3  -5  -5    2.13    1.52
  -4   5   4  412.41   18.80
  -5   5   3    0.47    1.00
  -6   5   2   55.81    4.47
   7  -5  -1   -0.54    1.33
   7  -5  -1   -0.16    1.15
   8  -5   0  429.88   19.98
   8  -5   0  445.19   18.96
   9  -5   1    0.00    1.13
  10  -5   2   93.41    6.55
  11  -5   3    0.35    1.34
  12  -5   4  160.68   10.04
  13  -5   5   -1.17    1.65
  14  -5   6    0.17    2.18
  14  -5   6    1.28    2.00
  15  -5   7    3.44    2.12
  15  -5   7    2.29    2.34
  16  -5   8    0.21    2.19
  17  -5   9    1.90    2.30
  -9  -5 -18   36.30    5.80
   8   5  17    0.92    1.59
  -8  -5 -17   -0.08    1.78
   7   5  16   31.42    5.15
  -7  -5 -16   35.42    5.35
  -6  -5 -15    1.75    2.25
   6   5  15    0.17    1.45
  -5  -5 -14  107.73    8.36
   5   5  14  113.43    8.38
  -4  -5 -13    0.28    1.67
   4   5  13    2.25    1.72
  -3  -5 -12  199.99   12.07
   3   5  12  201.25   11.69
  -2  -5 -11    0.07    1.71
   2   5  11   -0.48    1.18
   1   5  10  141.93    8.55
  -1  -5 -10  133.24    8.95
   0   5   9    0.16    0.50
   0  -5  -9    0.65    1.34
  -1   5   8   24.01    3.21
   1  -5  -8   24.90    3.56
   2  -5  -7    2.22    1.53
  -2   5   7    0.53    0.81
   3  -5  -6  484.73   21.49
  -3   5   6  496.43   21.71
   3  -5  -6  480.74   22.64
   4  -5  -5    0.98    1.34
   4  -5  -5    0.83    1.52
  -4   5   5    1.38    1.17
  -5   5   4  149.03    8.40
   5  -5  -4  152.94    8.60
  -6   5   3    0.06    0.79
   7  -5  -2  672.26   27.73
   7  -5  -2  696.47   29.45
   8  -5  -1   -0.27    1.35
   8  -5  -1    0.48    1.18
   9  -5   0  571.15   25.22
  10  -5   1    1.01    1.63
  11  -5   2  176.67   10.27
  12  -5   3   -0.11    1.58
  12  -5   3    0.28    2.34
  13  -5   4  137.61    9.38
  13  -5   4  141.06   10.31
  14  -5   5   -2.19    2.27
  15  -5   6  292.13   17.37
  16  -5   7    0.02    2.27
  17  -5   8    1.40    2.37
  18  -5   9   -1.81    1.99
  -8  -5 -18    0.92    2.21
   8   5  18    0.25    1.92
  -7  -5 -17    0.96    2.26
   7   5  17   -0.05    1.50
  -6  -5 -16   -3.15    1.66
   6   5  16    1.44    1.97
  -5  -5 -15   -1.03    2.16
   5   5  15    0.52    1.92
   4   5  14   10.80    3.11
  -4  -5 -14   11.52    3.51
   3   5  13    2.11    1.36
  -3  -5 -13    0.10    1.65
  -2  -5 -12  117.02    8.50
   2   5  12  116.89    8.04
   1   5  11    1.59    0.78
  -1  -5 -11    0.73    1.94
   0   5  10   77.81    5.68
   0  -5 -10   79.65    6.40
  -1   5   9   -0.39    0.86
   1  -5  -9    1.38    1.50
[truncated: 85,047 more chars]
