# Supplementary material for: Synthesis of Half-Titanocene Complexes Containing π,π-Stacked Aryloxide Ligands, and Their Use as Catalysts for Ethylene (Co)polymerizations
Source: Polymers (Basel). 2022 Mar 31;14(7):1427. doi: 10.3390/polym14071427 (PMC9002825; doi:10.3390/polym14071427)
Supplement: Supplementary file 1 [file polymers-14-01427-s001.zip › Ti 3.cif]

  
data_a064 
  
_audit_creation_method            SHELXL-97 
_chemical_name_systematic 
; 
 ? 
; 
_chemical_name_common             ? 
_chemical_melting_point           ? 
_chemical_formula_moiety          ? 
_chemical_formula_sum 
 'C22 H16 Cl4 O Ti' 
_chemical_formula_weight          486.05 
  
loop_ 
 _atom_type_symbol 
 _atom_type_description 
 _atom_type_scat_dispersion_real 
 _atom_type_scat_dispersion_imag 
 _atom_type_scat_source 
 'C'  'C'   0.0033   0.0016 
 'International Tables Vol C Tables 4.2.6.8 and 6.1.1.4' 
 'H'  'H'   0.0000   0.0000 
 'International Tables Vol C Tables 4.2.6.8 and 6.1.1.4' 
 'O'  'O'   0.0106   0.0060 
 'International Tables Vol C Tables 4.2.6.8 and 6.1.1.4' 
 'Cl'  'Cl'   0.1484   0.1585 
 'International Tables Vol C Tables 4.2.6.8 and 6.1.1.4' 
 'Ti'  'Ti'   0.2776   0.4457 
 'International Tables Vol C Tables 4.2.6.8 and 6.1.1.4' 
  
_symmetry_cell_setting            Monoclinic 
_symmetry_space_group_name_H-M    P2(1)/c 
  
loop_ 
 _symmetry_equiv_pos_as_xyz 
 'x, y, z' 
 '-x, y+1/2, -z+1/2' 
 '-x, -y, -z' 
 'x, -y-1/2, z-1/2' 
  
_cell_length_a                    16.6628(12) 
_cell_length_b                    10.2910(8) 
_cell_length_c                    12.0875(9) 
_cell_angle_alpha                 90.00 
_cell_angle_beta                  101.1540(10) 
_cell_angle_gamma                 90.00 
_cell_volume                      2033.6(3) 
_cell_formula_units_Z             4 
_cell_measurement_temperature     187(2) 
_cell_measurement_reflns_used     4135 
_cell_measurement_theta_min       2.34 
_cell_measurement_theta_max       26.36 
  
_exptl_crystal_description        block 
_exptl_crystal_colour             colourless 
_exptl_crystal_size_max           0.21 
_exptl_crystal_size_mid           0.18 
_exptl_crystal_size_min           0.11 
_exptl_crystal_density_meas       ? 
_exptl_crystal_density_diffrn     1.588 
_exptl_crystal_density_method     'not measured' 
_exptl_crystal_F_000              984 
_exptl_absorpt_coefficient_mu     0.957 
_exptl_absorpt_correction_type    multi-scan 
_exptl_absorpt_correction_T_min   0.8242 
_exptl_absorpt_correction_T_max   0.9020 
_exptl_absorpt_process_details    'SADABS' 
  
_exptl_special_details 
; 
 ? 
; 
  
_diffrn_ambient_temperature       187(2) 
_diffrn_radiation_wavelength      0.71073 
_diffrn_radiation_type            MoK\a 
_diffrn_radiation_source          'fine-focus sealed tube' 
_diffrn_radiation_monochromator   graphite 
_diffrn_measurement_device_type   'Bruker APEX CCD area detector' 
_diffrn_measurement_method        'phi and omega scans' 
_diffrn_detector_area_resol_mean  ? 
_diffrn_standards_number          ? 
_diffrn_standards_interval_count  ? 
_diffrn_standards_interval_time   ? 
_diffrn_standards_decay_%         ? 
_diffrn_reflns_number             12457 
_diffrn_reflns_av_R_equivalents   0.0287 
_diffrn_reflns_av_sigmaI/netI     0.0335 
_diffrn_reflns_limit_h_min        -20 
_diffrn_reflns_limit_h_max        20 
_diffrn_reflns_limit_k_min        -12 
_diffrn_reflns_limit_k_max        12 
_diffrn_reflns_limit_l_min        -8 
_diffrn_reflns_limit_l_max        15 
_diffrn_reflns_theta_min          2.34 
_diffrn_reflns_theta_max          26.36 
_reflns_number_total              4135 
_reflns_number_gt                 3462 
_reflns_threshold_expression      >2sigma(I) 
  
_computing_data_collection        'Bruker SMART' 
_computing_cell_refinement        'Bruker SMART' 
_computing_data_reduction         'Bruker SAINT' 
_computing_structure_solution     'SHELXS-97 (Sheldrick, 1990)' 
_computing_structure_refinement   'SHELXL-97 (Sheldrick, 1997)' 
_computing_molecular_graphics     'Bruker SHELXTL' 
_computing_publication_material   'Bruker SHELXTL' 
  
_refine_special_details 
; 
 Refinement of F^2^ against ALL reflections.  The weighted R-factor wR and 
 goodness of fit S are based on F^2^, conventional R-factors R are based 
 on F, with F set to zero for negative F^2^. The threshold expression of 
 F^2^ > 2sigma(F^2^) is used only for calculating R-factors(gt) etc. and is 
 not relevant to the choice of reflections for refinement.  R-factors based 
 on F^2^ are statistically about twice as large as those based on F, and R- 
 factors based on ALL data will be even larger. 
; 
  
_refine_ls_structure_factor_coef  Fsqd 
_refine_ls_matrix_type            full 
_refine_ls_weighting_scheme       calc 
_refine_ls_weighting_details 
 'calc w=1/[\s^2^(Fo^2^)+(0.0663P)^2^+1.7355P] where P=(Fo^2^+2Fc^2^)/3' 
_atom_sites_solution_primary      direct 
_atom_sites_solution_secondary    difmap 
_atom_sites_solution_hydrogens    geom 
_refine_ls_hydrogen_treatment     constr 
_refine_ls_extinction_method      none 
_refine_ls_extinction_coef        ? 
_refine_ls_number_reflns          4135 
_refine_ls_number_parameters      253 
_refine_ls_number_restraints      0 
_refine_ls_R_factor_all           0.0556 
_refine_ls_R_factor_gt            0.0454 
_refine_ls_wR_factor_ref          0.1238 
_refine_ls_wR_factor_gt           0.1166 
_refine_ls_goodness_of_fit_ref    1.033 
_refine_ls_restrained_S_all       1.033 
_refine_ls_shift/su_max           0.001 
_refine_ls_shift/su_mean          0.000 
  
loop_ 
 _atom_site_label 
 _atom_site_type_symbol 
 _atom_site_fract_x 
 _atom_site_fract_y 
 _atom_site_fract_z 
 _atom_site_U_iso_or_equiv 
 _atom_site_adp_type 
 _atom_site_occupancy 
 _atom_site_symmetry_multiplicity 
 _atom_site_calc_flag 
 _atom_site_refinement_flags 
 _atom_site_disorder_assembly 
 _atom_site_disorder_group 
Ti1 Ti 0.30476(3) 0.63454(4) 0.88850(4) 0.02219(15) Uani 1 1 d . . . 
O1 O 0.20424(11) 0.59381(18) 0.90626(16) 0.0263(4) Uani 1 1 d . . . 
Cl1 Cl 0.38545(4) 0.53820(7) 1.03941(7) 0.0379(2) Uani 1 1 d . . . 
Cl2 Cl 0.31194(5) 0.84788(7) 0.93102(6) 0.03418(19) Uani 1 1 d . . . 
Cl3 Cl 0.43398(6) 0.14119(12) 1.06271(9) 0.0645(3) Uani 1 1 d . . . 
Cl4 Cl 0.40439(6) 0.14710(11) 0.81732(9) 0.0621(3) Uani 1 1 d . . . 
C1 C 0.12395(15) 0.5598(2) 0.8768(2) 0.0223(5) Uani 1 1 d . . . 
C2 C 0.06581(15) 0.6387(2) 0.9150(2) 0.0198(5) Uani 1 1 d . . . 
C3 C 0.08771(16) 0.7521(2) 0.9839(2) 0.0244(6) Uani 1 1 d . . . 
H3A H 0.1434 0.7777 1.0033 0.029 Uiso 1 1 calc R . . 
C4 C 0.02995(17) 0.8228(2) 1.0214(2) 0.0254(6) Uani 1 1 d . . . 
H4A H 0.0461 0.8966 1.0676 0.031 Uiso 1 1 calc R . . 
C5 C -0.05522(16) 0.7892(2) 0.9933(2) 0.0239(6) Uani 1 1 d . . . 
C6 C -0.11540(18) 0.8600(3) 1.0326(3) 0.0300(6) Uani 1 1 d . . . 
H6A H -0.1002 0.9334 1.0796 0.036 Uiso 1 1 calc R . . 
C7 C -0.19735(18) 0.8244(3) 1.0039(3) 0.0332(7) Uani 1 1 d . . . 
H7A H -0.2376 0.8737 1.0314 0.040 Uiso 1 1 calc R . . 
C8 C -0.22063(17) 0.7174(3) 0.9353(3) 0.0307(6) Uani 1 1 d . . . 
H8A H -0.2768 0.6940 0.9163 0.037 Uiso 1 1 calc R . . 
C9 C -0.16241(16) 0.6436(2) 0.8939(2) 0.0243(6) Uani 1 1 d . . . 
C10 C -0.18431(16) 0.5316(3) 0.8230(2) 0.0278(6) Uani 1 1 d . . . 
H10A H -0.2403 0.5086 0.8006 0.033 Uiso 1 1 calc R . . 
C11 C -0.12676(17) 0.4588(3) 0.7879(2) 0.0271(6) Uani 1 1 d . . . 
H11A H -0.1432 0.3849 0.7420 0.032 Uiso 1 1 calc R . . 
C12 C -0.04121(15) 0.4900(2) 0.8179(2) 0.0217(5) Uani 1 1 d . . . 
C13 C 0.01935(16) 0.4156(3) 0.7841(2) 0.0249(6) Uani 1 1 d . . . 
H13A H 0.0042 0.3399 0.7400 0.030 Uiso 1 1 calc R . . 
C14 C 0.10130(16) 0.4492(3) 0.8131(2) 0.0255(6) Uani 1 1 d . . . 
H14A H 0.1417 0.3966 0.7895 0.031 Uiso 1 1 calc R . . 
C15 C -0.01807(15) 0.6025(2) 0.8849(2) 0.0197(5) Uani 1 1 d . . . 
C16 C -0.07839(15) 0.6791(2) 0.9234(2) 0.0210(5) Uani 1 1 d . . . 
C17 C 0.3220(2) 0.4842(3) 0.7526(3) 0.0464(8) Uani 1 1 d . . . 
H17A H 0.3142 0.3881 0.7568 0.056 Uiso 1 1 calc R . . 
C18 C 0.3976(2) 0.5522(4) 0.7826(3) 0.0549(10) Uani 1 1 d . . . 
H18A H 0.4521 0.5125 0.8137 0.066 Uiso 1 1 calc R . . 
C19 C 0.3833(2) 0.6809(4) 0.7507(3) 0.0501(9) Uani 1 1 d . . . 
H19A H 0.4258 0.7503 0.7562 0.060 Uiso 1 1 calc R . . 
C20 C 0.3007(2) 0.6947(3) 0.7008(3) 0.0396(7) Uani 1 1 d . . . 
H20A H 0.2746 0.7749 0.6633 0.047 Uiso 1 1 calc R . . 
C21 C 0.2639(2) 0.5736(3) 0.7007(3) 0.0391(7) Uani 1 1 d . . . 
H21A H 0.2066 0.5523 0.6627 0.047 Uiso 1 1 calc R . . 
C22 C 0.4686(2) 0.1948(4) 0.9430(3) 0.0603(11) Uani 1 1 d . . . 
H22A H 0.5241 0.1597 0.9445 0.072 Uiso 1 1 calc R . . 
H22B H 0.4725 0.2908 0.9449 0.072 Uiso 1 1 calc R . . 
  
loop_ 
 _atom_site_aniso_label 
 _atom_site_aniso_U_11 
 _atom_site_aniso_U_22 
 _atom_site_aniso_U_33 
 _atom_site_aniso_U_23 
 _atom_site_aniso_U_13 
 _atom_site_aniso_U_12 
Ti1 0.0187(2) 0.0268(3) 0.0214(3) -0.00061(19) 0.00454(19) -0.00017(18) 
O1 0.0190(9) 0.0332(10) 0.0270(10) -0.0001(8) 0.0053(8) -0.0011(7) 
Cl1 0.0293(4) 0.0425(4) 0.0387(4) 0.0128(3) -0.0015(3) 0.0009(3) 
Cl2 0.0402(4) 0.0278(3) 0.0341(4) -0.0017(3) 0.0061(3) -0.0018(3) 
Cl3 0.0539(6) 0.0947(8) 0.0473(6) -0.0066(5) 0.0159(5) -0.0054(5) 
Cl4 0.0580(6) 0.0768(7) 0.0461(6) 0.0098(5) -0.0029(4) -0.0112(5) 
C1 0.0196(12) 0.0274(13) 0.0196(13) 0.0060(10) 0.0033(10) -0.0022(10) 
C2 0.0206(12) 0.0218(12) 0.0169(12) 0.0046(10) 0.0030(10) -0.0027(9) 
C3 0.0240(13) 0.0261(13) 0.0223(13) 0.0012(11) 0.0022(11) -0.0074(10) 
C4 0.0310(14) 0.0206(12) 0.0242(14) -0.0047(11) 0.0040(11) -0.0044(10) 
C5 0.0286(14) 0.0215(12) 0.0214(13) 0.0026(10) 0.0048(11) -0.0001(10) 
C6 0.0373(16) 0.0239(13) 0.0306(16) -0.0008(11) 0.0106(13) 0.0015(11) 
C7 0.0319(16) 0.0315(14) 0.0387(18) 0.0037(13) 0.0135(13) 0.0082(12) 
C8 0.0223(14) 0.0320(14) 0.0386(17) 0.0054(13) 0.0076(12) 0.0008(11) 
C9 0.0234(13) 0.0237(13) 0.0255(14) 0.0063(11) 0.0042(11) -0.0006(10) 
C10 0.0206(13) 0.0316(14) 0.0291(15) 0.0036(12) -0.0001(11) -0.0063(11) 
C11 0.0296(14) 0.0256(13) 0.0238(14) -0.0013(11) -0.0003(11) -0.0075(11) 
C12 0.0246(13) 0.0225(12) 0.0179(13) 0.0027(10) 0.0037(10) -0.0052(10) 
C13 0.0307(14) 0.0222(12) 0.0211(14) -0.0024(10) 0.0035(11) -0.0034(10) 
C14 0.0260(14) 0.0262(13) 0.0251(14) 0.0008(11) 0.0069(11) 0.0024(10) 
C15 0.0230(13) 0.0194(11) 0.0164(12) 0.0047(10) 0.0030(10) -0.0017(10) 
C16 0.0233(13) 0.0224(12) 0.0174(13) 0.0057(10) 0.0038(10) -0.0016(10) 
C17 0.064(2) 0.0411(18) 0.0372(19) -0.0102(15) 0.0185(17) 0.0079(16) 
C18 0.039(2) 0.092(3) 0.037(2) -0.0082(19) 0.0161(16) 0.0248(19) 
C19 0.049(2) 0.074(3) 0.0346(19) -0.0116(18) 0.0252(16) -0.0214(19) 
C20 0.054(2) 0.0471(18) 0.0206(15) 0.0030(13) 0.0150(14) -0.0008(15) 
C21 0.0435(18) 0.0532(19) 0.0208(15) -0.0079(14) 0.0069(13) -0.0040(15) 
C22 0.044(2) 0.077(3) 0.058(3) 0.010(2) 0.0039(18) -0.020(2) 
  
_geom_special_details 
; 
 All esds (except the esd in the dihedral angle between two l.s. planes) 
 are estimated using the full covariance matrix.  The cell esds are taken 
 into account individually in the estimation of esds in distances, angles 
 and torsion angles; correlations between esds in cell parameters are only 
 used when they are defined by crystal symmetry.  An approximate (isotropic) 
 treatment of cell esds is used for estimating esds involving l.s. planes. 
; 
  
loop_ 
 _geom_bond_atom_site_label_1 
 _geom_bond_atom_site_label_2 
 _geom_bond_distance 
 _geom_bond_site_symmetry_2 
 _geom_bond_publ_flag 
Ti1 O1 1.7794(18) . ? 
Ti1 Cl2 2.2528(8) . ? 
Ti1 Cl1 2.2737(9) . ? 
Ti1 C17 2.314(3) . ? 
Ti1 C21 2.327(3) . ? 
Ti1 C20 2.340(3) . ? 
Ti1 C18 2.349(3) . ? 
Ti1 C19 2.357(3) . ? 
O1 C1 1.362(3) . ? 
Cl3 C22 1.747(4) . ? 
Cl4 C22 1.750(4) . ? 
C1 C14 1.385(4) . ? 
C1 C2 1.409(4) . ? 
C2 C15 1.424(3) . ? 
C2 C3 1.439(4) . ? 
C3 C4 1.353(4) . ? 
C3 H3A 0.9500 . ? 
C4 C5 1.436(4) . ? 
C4 H4A 0.9500 . ? 
C5 C6 1.395(4) . ? 
C5 C16 1.422(4) . ? 
C6 C7 1.391(4) . ? 
C6 H6A 0.9500 . ? 
C7 C8 1.388(4) . ? 
C7 H7A 0.9500 . ? 
C8 C9 1.399(4) . ? 
C8 H8A 0.9500 . ? 
C9 C16 1.424(4) . ? 
C9 C10 1.440(4) . ? 
C10 C11 1.349(4) . ? 
C10 H10A 0.9500 . ? 
C11 C12 1.438(4) . ? 
C11 H11A 0.9500 . ? 
C12 C13 1.390(4) . ? 
C12 C15 1.423(4) . ? 
C13 C14 1.386(4) . ? 
C13 H13A 0.9500 . ? 
C14 H14A 0.9500 . ? 
C15 C16 1.425(4) . ? 
C17 C21 1.394(5) . ? 
C17 C18 1.425(5) . ? 
C17 H17A 1.0000 . ? 
C18 C19 1.387(6) . ? 
C18 H18A 1.0000 . ? 
C19 C20 1.398(5) . ? 
C19 H19A 1.0000 . ? 
C20 C21 1.389(5) . ? 
C20 H20A 1.0000 . ? 
C21 H21A 1.0000 . ? 
C22 H22A 0.9900 . ? 
C22 H22B 0.9900 . ? 
  
loop_ 
 _geom_angle_atom_site_label_1 
 _geom_angle_atom_site_label_2 
 _geom_angle_atom_site_label_3 
 _geom_angle 
 _geom_angle_site_symmetry_1 
 _geom_angle_site_symmetry_3 
 _geom_angle_publ_flag 
O1 Ti1 Cl2 102.22(7) . . ? 
O1 Ti1 Cl1 103.00(7) . . ? 
Cl2 Ti1 Cl1 104.17(3) . . ? 
O1 Ti1 C17 100.20(12) . . ? 
Cl2 Ti1 C17 143.61(10) . . ? 
Cl1 Ti1 C17 98.20(10) . . ? 
O1 Ti1 C21 87.12(10) . . ? 
Cl2 Ti1 C21 118.55(9) . . ? 
Cl1 Ti1 C21 132.95(9) . . ? 
C17 Ti1 C21 34.95(12) . . ? 
O1 Ti1 C20 109.16(11) . . ? 
Cl2 Ti1 C20 87.33(9) . . ? 
Cl1 Ti1 C20 142.64(9) . . ? 
C17 Ti1 C20 58.21(12) . . ? 
C21 Ti1 C20 34.64(12) . . ? 
O1 Ti1 C18 135.68(13) . . ? 
Cl2 Ti1 C18 117.68(12) . . ? 
Cl1 Ti1 C18 85.99(10) . . ? 
C17 Ti1 C18 35.59(14) . . ? 
C21 Ti1 C18 58.01(12) . . ? 
C20 Ti1 C18 57.70(13) . . ? 
O1 Ti1 C19 142.84(11) . . ? 
Cl2 Ti1 C19 87.24(10) . . ? 
Cl1 Ti1 C19 109.41(11) . . ? 
C17 Ti1 C19 58.11(13) . . ? 
C21 Ti1 C19 57.49(12) . . ? 
C20 Ti1 C19 34.63(13) . . ? 
C18 Ti1 C19 34.29(14) . . ? 
C1 O1 Ti1 158.26(18) . . ? 
O1 C1 C14 120.3(2) . . ? 
O1 C1 C2 118.0(2) . . ? 
C14 C1 C2 121.7(2) . . ? 
C1 C2 C15 117.9(2) . . ? 
C1 C2 C3 122.9(2) . . ? 
C15 C2 C3 119.1(2) . . ? 
C4 C3 C2 120.9(2) . . ? 
C4 C3 H3A 119.6 . . ? 
C2 C3 H3A 119.6 . . ? 
C3 C4 C5 121.7(2) . . ? 
C3 C4 H4A 119.1 . . ? 
C5 C4 H4A 119.1 . . ? 
C6 C5 C16 119.2(2) . . ? 
C6 C5 C4 122.4(2) . . ? 
C16 C5 C4 118.3(2) . . ? 
C7 C6 C5 120.9(3) . . ? 
C7 C6 H6A 119.6 . . ? 
C5 C6 H6A 119.6 . . ? 
C8 C7 C6 120.3(3) . . ? 
C8 C7 H7A 119.8 . . ? 
C6 C7 H7A 119.8 . . ? 
C7 C8 C9 120.8(3) . . ? 
C7 C8 H8A 119.6 . . ? 
C9 C8 H8A 119.6 . . ? 
C8 C9 C16 119.2(3) . . ? 
C8 C9 C10 122.3(2) . . ? 
C16 C9 C10 118.5(2) . . ? 
C11 C10 C9 121.2(2) . . ? 
C11 C10 H10A 119.4 . . ? 
C9 C10 H10A 119.4 . . ? 
C10 C11 C12 121.8(3) . . ? 
C10 C11 H11A 119.1 . . ? 
C12 C11 H11A 119.1 . . ? 
C13 C12 C15 118.9(2) . . ? 
C13 C12 C11 122.9(2) . . ? 
C15 C12 C11 118.1(2) . . ? 
C14 C13 C12 121.6(2) . . ? 
C14 C13 H13A 119.2 . . ? 
C12 C13 H13A 119.2 . . ? 
C1 C14 C13 119.7(2) . . ? 
C1 C14 H14A 120.2 . . ? 
C13 C14 H14A 120.2 . . ? 
C12 C15 C2 120.2(2) . . ? 
C12 C15 C16 120.4(2) . . ? 
C2 C15 C16 119.4(2) . . ? 
C5 C16 C9 119.6(2) . . ? 
C5 C16 C15 120.5(2) . . ? 
C9 C16 C15 119.9(2) . . ? 
C21 C17 C18 107.1(3) . . ? 
C21 C17 Ti1 73.01(18) . . ? 
C18 C17 Ti1 73.51(19) . . ? 
C21 C17 H17A 126.1 . . ? 
C18 C17 H17A 126.1 . . ? 
Ti1 C17 H17A 126.1 . . ? 
C19 C18 C17 107.5(3) . . ? 
C19 C18 Ti1 73.18(19) . . ? 
C17 C18 Ti1 70.90(18) . . ? 
C19 C18 H18A 126.1 . . ? 
C17 C18 H18A 126.1 . . ? 
Ti1 C18 H18A 126.1 . . ? 
C18 C19 C20 108.7(3) . . ? 
C18 C19 Ti1 72.53(19) . . ? 
C20 C19 Ti1 72.05(18) . . ? 
C18 C19 H19A 125.6 . . ? 
C20 C19 H19A 125.6 . . ? 
Ti1 C19 H19A 125.6 . . ? 
C21 C20 C19 107.8(3) . . ? 
C21 C20 Ti1 72.14(17) . . ? 
C19 C20 Ti1 73.33(19) . . ? 
C21 C20 H20A 125.9 . . ? 
C19 C20 H20A 125.9 . . ? 
Ti1 C20 H20A 125.9 . . ? 
C20 C21 C17 108.9(3) . . ? 
C20 C21 Ti1 73.22(18) . . ? 
C17 C21 Ti1 72.04(19) . . ? 
C20 C21 H21A 125.4 . . ? 
C17 C21 H21A 125.4 . . ? 
Ti1 C21 H21A 125.4 . . ? 
Cl3 C22 Cl4 112.7(2) . . ? 
Cl3 C22 H22A 109.0 . . ? 
Cl4 C22 H22A 109.0 . . ? 
Cl3 C22 H22B 109.0 . . ? 
Cl4 C22 H22B 109.0 . . ? 
H22A C22 H22B 107.8 . . ? 
  
_diffrn_measured_fraction_theta_max    0.997 
_diffrn_reflns_theta_full              26.36 
_diffrn_measured_fraction_theta_full   0.997 
_refine_diff_density_max    1.256 
_refine_diff_density_min   -0.735 
_refine_diff_density_rms    0.082 
  
  
